# Supplementary material for: Inflammatory Cytokine-Induced HIF-1 Activation Promotes Epithelial–Mesenchymal Transition in Endometrial Epithelial Cells
Source: MDPI journal article supplement (doi:10.3390/biomedicines11010210), 2023-01-14
Supplement: s1 [file s1]

**Table S1.** The expression matrix, calculated as scaled TPM and loaded at gene level by tximport. e\_ctl: control, e\_cyt: treated by cytokines (500 ng/mL TNF $\alpha$  and 100 ng/mL IL-1 $\beta$ ) under 20% O<sub>2</sub> conditions for 8h, e\_hypo: exposed to 1% O<sub>2</sub> for 8h.

**Table S2.** Gene set enrichment analyses for gene lists analyzed by RNA-Seq were performed using Metascape database between cytokines (500 ng/mL TNF $\alpha$  and 100 ng/mL IL-1 $\beta$ )-treatment between control groups.

**Table S3.** Gene set enrichment analyses for gene lists analyzed by RNA-Seq were performed using Metascape database between 1% O<sub>2</sub> conditions between control groups.

**Figure S1.** Under hypoxic situations, pro-inflammatory substances cause the buildup of HIF-1 protein in endometrial epithelial cells. Immortalized endometrial epithelial cells EM-E6/E7/TERT were incubated with culture media (-) or DMOG (1 mmol/L) under 20% or 1% O<sub>2</sub> conditions for 6 h before protein were extracted. (A) Illustrations of immunoblots. Immunoblotting was done on whole-cell lysates for HIF-1 $\alpha$ , HIF-2 $\alpha$ , HIF-1 $\beta$ , and  $\beta$ -actin. There were at least three such experiments carried out. (B) Densitometric analysis results that have been  $\beta$ -actin normalized.

**Figure S2.** Principal component analysis (PCA) for the RNA-Seq results were performed using iDEP 0.93.

**Figure S3.** Results of gene set enrichment analyses with the gene sets whose expression was upregulated by pro-inflammatory cytokine treatment (500 ng/mL TNF $\alpha$  and 100 ng/mL IL-1 $\beta$ ).

**Figure S4.** Results of gene set enrichment analyses with the gene sets whose expression was upregulated by exposure to 1% O<sub>2</sub>.

**Figure S5.** Results of gene set enrichment analyses with the gene sets whose expression was commonly upregulated by pro-inflammatory cytokine treatment (500 ng/mL TNF $\alpha$  and 100 ng/mL IL-1 $\beta$ ) and exposure to 1% O<sub>2</sub>.
