# Supplementary material for: Inflammatory Cytokine-Induced HIF-1 Activation Promotes Epithelial–Mesenchymal Transition in Endometrial Epithelial Cells
Source: Biomedicines. 2023 Jan 14;11(1):210. doi: 10.3390/biomedicines11010210 (PMC9855875; doi:10.3390/biomedicines11010210)
Supplement: Supplementary file 1 [file biomedicines-11-00210-s001.zip]

Archive with 10 entries (10 files):
- Biomedicins_WB_revise.pptx
- figure_S1.pdf
- figure_S2.jpg
- figure_S3.pdf
- figure_S4.pdf
- figure_S5.pdf
- supplementary_captions_2.pdf
- Table_S1.csv
- Table_S2.csv
- Table_S3.csv
