# Supplementary material for: Inflammatory Cytokine-Induced HIF-1 Activation Promotes Epithelial–Mesenchymal Transition in Endometrial Epithelial Cells
Source: Biomedicines. 2023 Jan 14;11(1):210. doi: 10.3390/biomedicines11010210 (PMC9855875; doi:10.3390/biomedicines11010210)
Supplement: Supplementary file 1 [file biomedicines-11-00210-s001.zip › Table_S1.csv]

	e_ctl_1	e_ctl_2	e_ctl_3	e_cyt_1	e_cyt_2	e_cyt_3	e_hypo_1	e_hypo_2	e_hypo_3
A1BG	665.6878338	402.7856939	525.9019278	224.5192544	230.2206164	390.8478208	546.6916188	519.1081268	574.7942806
A1BG-AS1	239.6907996	163.5019269	198.7071717	149.0341353	91.45856093	127.0561847	169.2744762	137.2472689	191.4552073
A1CF	0	0	0	0	0	0	0	0	0
A2M	1.325420818	1.323708984	7.793685387	0.658282681	0	0.327918363	0.994764869	1.995668617	6.793360665
A2M-AS1	0.826136957	0	0	0	0	0.802488871	1.628438722	1.647799562	2.473163285
A2ML1	0	0	1.46970027	0	0	0	0	0	0.4795443
A2ML1-AS1	0	0	0	0	0	0	0	0	0
A2ML1-AS2	0	0	0	0	0	0	0	0	0
A2MP1	2.070009579	0.787418419	0.795354369	0.392410577	0	0.391288312	0	0.397807311	0
A3GALT2	0	2.061030671	2.198905557	0	2.080061017	0	2.061940901	2.104341337	6.136307866
A4GALT	106.1172246	64.27595418	74.57648521	112.1012678	132.9737377	150.3360226	79.032647	61.69827342	97.35743365
A4GNT	0	0	0	0	0	0.976009874	0	0	0
AAAS	1830.799154	1320.634187	1311.765505	1157.254119	924.6761755	1156.23046	1429.773718	1358.474898	1523.595502
AACS	912.2336342	605.8943593	677.4670272	559.9034507	578.050281	646.2388549	748.0960608	693.3328361	787.1071798
AACSP1	14.1460159	3.524228885	4.751088483	1.754966571	0	4.080968393	5.892064931	5.863602976	1.749454124
AADAC	2.670921042	0	3.066148728	2.579303699	2.569814499	0	1.328562054	0	1.342745534
AADACL2	0	0	0	0	0	0	0	0	0
AADACL2-AS1	36.23030003	37.35461875	17.36407489	36.03224756	5.562146716	7.280108739	32.14992207	14.63546944	17.90310363
AADACL3	0	0	0	0	0	0	0	0	0
AADACL4	0	0	0	1.120090296	0	0	0	0	0
AADACP1	1.691262176	0	1.638571359	3.202284073	4.780530961	3.051305296	3.069502133	6.201349411	3.094026596
AADAT	302.5454903	187.0991197	297.1585662	127.5755998	115.2998631	129.6363555	258.0085688	245.2097531	246.7896599
AAGAB	1203.225333	847.1674798	928.9264914	953.7022765	892.8344308	1069.501785	908.3455466	875.7582867	1068.865933
AAK1	861.229064	630.1524511	730.0602203	643.8401578	489.2580497	675.3634018	755.9013343	648.5789435	678.8798693
AAMDC	1786.851519	1090.336267	1422.32064	1225.166919	1097.685313	1295.568642	1490.475727	1379.215587	1605.342343
AAMP	2629.082375	1842.761528	1982.319633	2114.062896	1705.00682	2102.692307	1939.602747	1839.135106	2124.860042
AANAT	0	2.621006061	5.82066863	0	0	0	16.76978576	5.589198541	7.065466927
AAR2	889.5657868	626.4316789	650.2451974	723.6531753	597.0128335	744.3538711	639.2346605	613.452616	700.944979
AARD	5.14672069	0	0	3.715606335	1.626060607	0	4.532730671	1.666066818	4.160985126
AARS	3170.917767	2298.989248	2611.51327	2147.95275	1829.396776	2323.946484	2624.031368	2445.035503	2742.256309
AARS2	346.3393931	236.0835886	261.3459889	220.8161092	187.4787959	255.9475067	259.8091491	226.424731	297.8076766
AARSD1	1286.882137	848.0626716	940.4694944	1001.045316	823.9062336	1009.56536	1075.712019	874.6908274	1258.753359
AARSP1	0	0	0	0	0	0	0	0	0
AASDH	207.7087494	143.5422979	150.1274657	132.8963049	121.287594	159.2434435	178.4271	162.5956811	192.7507211
AASDHPPT	1142.665097	722.6834776	805.4520066	780.4952592	640.725325	922.6406321	745.7733686	714.6083483	882.7465396
AASS	321.0454356	222.1649856	267.5461905	236.1161392	195.3469248	254.2373912	250.6835651	223.788289	268.82527
AATBC	0	0	0	0	0	0	4.308921271	4.28365987	0.888133561
AATF	1697.488502	1249.024806	1344.432597	1328.334956	1188.617981	1481.370319	1357.375528	1301.244516	1368.41804
AATK	12.27827106	1.027680887	10.21202849	4.980066109	4.10778717	0.823048899	10.85679979	12.46620372	21.30545285
ABALON	0.901142089	0.903652286	3.684544221	0.904165561	1.789357197	0	0	0	0
ABAT	4.330458358	3.2469468	4.153920465	8.554386137	7.362702303	14.84800154	6.585937547	6.65335346	3.161677027
ABCA1	219.2339978	143.6935329	172.7476533	484.377531	404.7363797	535.9309253	188.2008553	175.8075379	205.0380061
ABCA10	3.37207946	3.476429774	1.791314311	2.499269721	1.767164852	7.954562148	10.67803156	6.391840821	5.535943871
ABCA11P	97.52753125	75.28821657	79.04094348	68.40893353	43.92753235	70.47600171	67.2525033	53.73081778	71.74301372
ABCA12	0.928755023	0	0.230798395	0.853344627	0.841264782	0.34050786	0.228988881	0.463034213	0
ABCA13	2.979615632	2.950682499	3.038493715	1.680944777	1.393824644	7.766846277	1.842752409	10.11068179	0.946944838
ABCA17P	13.65129418	42.88563726	17.57556695	8.515101401	6.478438433	3.555166802	33.36583043	28.85486431	36.2325017
ABCA2	609.5428459	377.0549343	358.8214175	212.4653665	215.1305714	327.2971124	505.5181536	549.687583	660.663016
ABCA3	32.90207111	14.79180639	21.23632217	9.839194839	4.731285306	6.355442606	28.50191771	20.91228473	26.18893813
ABCA4	0	0.867062131	0	0.213869288	0.211769942	0	0.215456219	0.216251731	0
ABCA5	312.1148125	192.0503432	272.8469876	228.803346	218.7798152	236.4640638	302.9877586	253.1654339	271.891194
ABCA6	2.737102041	3.838788264	5.948626429	0.652219112	4.213728928	1.230362767	2.503720093	1.353126618	4.185675652
ABCA7	302.8765754	235.5044592	246.4497325	47.59639944	103.6835447	46.09991994	224.8444842	221.0037076	268.2741527
ABCA8	3.414639395	1.74943458	7.29885989	1.620077844	2.351366411	2.497198461	4.636117158	3.39624356	4.205664501
ABCA9	1.432210838	1.882245676	6.356241392	0	4.772489927	4.6396097	8.608803841	2.367599255	0
ABCA9-AS1	0	0	0	0	0	0	0	0	0
ABCB1	34.11574959	25.0495042	36.5480441	19.68930924	19.36869283	20.42537383	41.95175824	44.49140265	31.03626079
ABCB10	518.895047	387.2696644	424.5134334	358.2519721	329.3770817	421.1330799	409.8887256	426.479759	407.9024398
ABCB10P1	2.579378164	4.110444398	1.589072207	0	1.712808372	1.728168923	7.442760672	2.184438018	2.13160652
ABCB10P3	2.636945128	1.595536903	3.765872728	3.517795228	0	0.860282265	6.38848256	2.193373848	2.173545489
ABCB10P4	0	1.2144324	0	0	0.85355348	0	0	0	0
ABCB11	7.03754634	2.812739332	6.451492276	4.654791578	5.164524403	6.284721743	6.462670997	10.23434064	4.215712659
ABCB4	6.683020283	3.10183162	7.15724061	6.367081926	5.885128246	5.725432654	8.277647175	7.479824619	6.25194228
ABCB5	0	0.295727474	0	1.453072754	1.425807062	2.24439461	2.224662903	1.80831871	4.452220501
ABCB6	531.7916977	348.7765421	459.9759115	336.3323228	246.3775522	361.9369855	692.4961438	671.3493223	908.6829305
ABCB7	366.7004201	283.8480206	320.1263625	299.2636416	327.8888544	349.4135063	433.3307736	351.1216272	348.0156612
ABCB8	1257.377958	794.7051854	903.3585546	905.2130678	715.7332479	927.7492076	1018.989323	909.5851257	989.4315922
ABCB9	321.9162334	241.4720687	288.1956857	176.6887395	118.2238238	182.5153673	257.4571827	242.5398947	335.068798
ABCC1	787.1489354	538.2696544	573.9664347	606.7215293	523.7233522	623.6197542	702.6611021	631.5149761	730.5219733
ABCC10	924.4539481	534.5292988	648.1057762	568.1922987	440.3293804	557.0051511	573.0025402	509.642826	695.8829643
ABCC11	6.406410721	3.316476684	1.436044641	3.900005648	1.39902633	0.467951869	0.953049742	0.47715934	2.362418615
ABCC12	0	0	0	0	0	0	1.513956977	0	0
ABCC13	0	0	0	0	0	0	0	0	0
ABCC2	30.60602566	13.62594613	9.008015569	16.6475556	13.87275972	13.39167562	14.49355656	12.60922353	19.59756156
ABCC3	444.7873355	219.6988865	308.6925801	408.758037	291.9001395	370.019048	380.0138394	281.4241574	405.8594398
ABCC4	412.753361	309.097697	371.1763063	276.6098379	261.8970203	359.3314948	320.6954365	327.4332316	365.1181362
ABCC5	419.2764063	277.3878183	361.9907863	209.310666	160.8179756	168.2502848	306.3722442	326.8143555	299.9256617
ABCC5-AS1	0	0	0	0	0	0	0	0	0
ABCC6	23.22718946	10.47996583	5.714033178	2.863417897	8.473000999	9.253533447	24.1339656	11.90245526	23.12489481
ABCC6P1	0	2.657360012	9.940506545	0	0	0	4.202919654	2.670509918	0.609256883
ABCC6P2	6.974696902	6.328679602	0	0	0	0	3.189594982	0	7.025059362
ABCC8	0	0	0	0	0	0	0	0	0
ABCC9	697.6065243	524.4051636	566.2660078	535.2810423	407.1974812	521.0734605	582.8414452	499.8955113	616.2011537
ABCD1	361.8720885	256.7310438	304.7098314	243.5201943	198.240266	297.6191346	336.4792422	317.0255731	358.7927134
ABCD1P2	0	0	0	0	0	0	0	0	0
ABCD1P3	0	0	0	0	0	0	0	0	0
ABCD1P4	0	0	0	0	0	0	0	0	0
ABCD1P5	0	0	5.790380936	0	0	0	0	0	0
ABCD2	0	0	0.750954555	0	0	0	0.393564324	0.746444289	0.384677869
ABCD3	1187.592901	813.4097978	983.9807908	645.1138157	578.3438469	721.3691963	1041.502238	906.0999195	1088.816497
ABCD4	1020.841726	612.7739097	844.7927326	751.1044957	623.6465778	758.6439073	835.308478	695.6051198	867.0669805
ABCE1	2109.804138	1682.226066	1904.843308	1865.683547	1684.185221	2133.771746	1831.84186	1529.640622	1777.401543
ABCF1	2670.845406	1898.73594	2113.730893	2650.249619	2271.115847	2697.077222	2161.65176	2026.170746	2288.641548
ABCF2	1865.869831	1317.051079	1463.424076	1689.498906	1420.030033	1810.57926	1465.978792	1338.946108	1588.119102
ABCF2P1	0	0	0	0	0	0	0	0	0
ABCF2P2	0	0	0	0	0	0	0	0	0
ABCF3	1760.844698	1115.816865	1161.170608	1144.719102	999.4561556	1249.880712	1123.915283	1210.395309	1303.774506
ABCG1	1.98134805	5.292924831	5.335923219	0.762031382	4.272810084	2.1830525	1.512763665	8.780406698	3.134461028
ABCG2	14.89972893	11.87745637	12.1085789	8.454902489	9.910733323	14.73886441	18.3427228	9.995702798	14.18547332
ABCG4	12.50250609	2.64125519	10.39968411	2.207190664	3.003030881	2.186629381	12.33676009	6.667013179	11.17938154
ABCG5	0	0.548272552	0	0	0	0.544418274	0	0	0.547194732
ABCG8	0.77106116	0.44670481	0.899641754	1.085533089	0.657615744	0	0.990220129	0.448583302	0.76556753
ABHD1	2.34727945	0	8.878444957	0.583747024	0.546699448	0.959787167	14.47278786	6.629989989	1.124883204
ABHD10	1389.499783	931.1970286	1012.796389	824.1522654	708.9493183	899.1897234	988.8156263	936.2999054	1049.144865
ABHD11	1389.594717	936.5496701	1017.326593	889.3624605	723.4225888	755.7775296	952.0375086	944.1910574	964.9973203
ABHD11-AS1	0	9.548870925	6.927296058	0	0	3.349904496	0	3.344397132	12.95108132
ABHD12	4437.9137	3082.477682	3375.460984	3234.351028	2905.052632	3779.075392	3597.772854	3614.996509	4081.165381
ABHD12B	25.51363042	11.46315446	18.82725275	3.483623418	0.688825859	5.609282579	13.6202048	9.245651598	9.428852745
ABHD13	200.5089471	155.1228243	161.4686773	150.1324121	159.894347	157.1495596	156.1141026	137.9017021	161.5874881
ABHD14A	522.1154654	332.36152	320.2162769	280.2665042	259.4507515	429.0925145	361.7370027	377.3302759	464.217367
ABHD14A-ACY1	37.79679377	18.55464431	24.53706415	41.15324027	35.4306354	29.68484997	19.42117182	35.86478995	68.46707248
ABHD14B	1295.567665	889.036731	889.9115063	777.8320675	760.6107807	907.5265612	1072.648357	1064.531806	1201.782051
ABHD15	344.0046595	258.5520911	295.1248554	126.430433	114.5468907	135.9104874	263.3877383	274.8204164	287.780045
ABHD15-AS1	0	0	0	0	0	0	0	0	0
ABHD16A	1063.424261	702.3879021	841.6993558	1097.690006	924.2564972	1240.128696	785.876941	782.0294389	933.008419
ABHD16B	0	2.656715819	0	0	0	0	1.329526859	0	1.33267051
ABHD17A	2627.781085	2068.834059	2047.037153	2071.159699	1787.419127	2299.559052	2276.776599	1973.868032	2301.821319
ABHD17AP1	0	0	0	0	0	0	0	0	0
ABHD17AP3	0	0	0	0	0	0	0	0	0
ABHD17AP4	0	0	0	0	0	0	0	2.361083546	0
ABHD17AP5	0	0	0	0	0	0	0	0	0
ABHD17AP6	0	0	0	0	0	0	0	0	0
ABHD17AP7	0	0	0	0	0	0	0	0	0
ABHD17AP8	0	0	0	0	0	0	0	0	0
ABHD17AP9	0	0	0	0	0	0	0	0	0
ABHD17B	397.5395649	270.966697	284.1422577	249.5048346	183.4305441	284.2723249	311.7127199	255.9730064	337.8557647
ABHD17C	362.1907177	263.3032712	293.0449898	196.8964839	192.9313892	209.5737441	293.9081299	238.2809946	276.4912621
ABHD18	156.6579275	97.71046605	100.8591119	90.04500827	82.42559504	103.4197851	145.4340906	106.5783381	128.8515304
ABHD2	685.4888885	469.0030307	482.8300994	558.2517703	555.8759033	573.8246903	441.4205884	452.9946926	514.9072871
ABHD3	401.8940945	252.5871013	280.8072197	239.1387772	231.9962539	233.4471473	313.1843016	305.1335662	263.3387609
ABHD4	723.2727762	477.8050244	589.0213397	283.931341	223.9470199	251.3652398	535.9739286	479.4830048	581.9974933
ABHD5	1674.178954	1102.152525	1293.922139	1110.129316	832.990603	1157.909144	1018.112518	1020.022509	1057.336505
ABHD6	355.7999443	260.7623598	308.8692544	185.7219677	165.2556268	205.8249751	259.1969802	257.4339447	305.0782441
ABHD8	500.1075371	377.0339765	330.5905355	244.5844021	191.7468813	250.3896242	453.5540793	405.806019	496.4094346
ABI1	1336.541837	1024.669221	1107.768565	1370.82249	1204.28664	1545.293952	1192.151761	1013.682608	1133.252137
ABI1P1	0	0	0	0	0	0	0	0	0
ABI2	1567.580544	1379.718376	1147.229635	1231.903699	1026.106936	1329.242814	1602.316217	1361.342997	1522.648477
ABI3	0	7.321638494	2.248618169	3.195835107	4.342885196	1.022790978	3.289833157	5.500980494	2.301646068
ABI3BP	3743.026179	3072.774291	3013.885166	11859.77856	9800.006719	12444.83876	3113.185691	3158.787966	3458.094726
ABL1	1154.006899	760.7140909	909.9889981	1667.825165	1471.228886	1862.242499	1023.536551	1015.788066	1082.731504
ABL2	745.0627725	588.7382148	604.9227348	859.3179107	705.3511828	902.3151011	597.2737366	523.3449667	656.2872582
ABLIM1	234.0748691	150.0864815	188.484399	137.9058667	122.9896356	152.2315164	246.8603979	240.430015	231.7780078
ABLIM2	0	1.948833746	0	0	0	0	0	1.860723628	0
ABLIM3	1336.439339	993.9318587	1099.753378	2615.564512	2257.283066	2763.43398	1211.583824	1039.624857	1202.220543
ABO	0.716165447	0	1.045127044	0	0.254133016	0	0.550726002	0	0
ABR	1608.471638	1144.167535	1394.811895	1482.455424	1260.895178	1748.14054	1260.302929	1260.200669	1396.028121
ABRA	0	0	0	0	0	0	0	0	0
ABRACL	2392.423926	1801.317616	1960.677166	1853.760154	1594.420161	2516.13971	1960.030795	1733.481649	1996.850435
ABRAXAS1	370.1667136	245.2355508	220.832178	256.7389812	220.9948702	245.2141019	301.084782	230.2925956	258.8870509
ABRAXAS2	544.8789377	376.1822462	431.2940583	442.4895711	373.4190739	537.0863144	426.9859104	364.3439092	439.8296014
ABT1	450.5671727	283.5933497	373.2863648	361.8450738	345.0159387	401.4164356	338.6463976	333.5669805	362.3858702
ABT1P1	0	0	0	0	0	0	2.517024248	0	0
ABTB1	389.6716796	251.0970618	278.8613836	212.6257427	235.9596432	233.8145521	382.1889672	338.6861172	392.6696475
ABTB2	91.69772061	89.04117607	84.53546796	166.9208943	152.6784276	169.7609962	75.2036655	70.75950718	89.46533111
ACAA1	1491.392378	1004.220242	1085.539674	1045.299379	1007.804657	1297.217219	1240.320418	1209.690473	1249.003745
ACAA2	644.334392	428.5004346	432.8491428	272.9909917	229.1007094	351.222479	525.460828	559.2499678	668.1464487
ACACA	1317.402082	707.166761	1018.800112	649.6434049	637.6278006	729.1150882	903.2961628	943.5710411	967.2798373
ACACB	109.9365436	77.37909485	80.93163558	20.37572586	42.4651772	37.45293548	88.04364763	88.47604602	118.2239378
ACAD10	372.2850759	249.9137653	296.0863533	258.4571553	169.4640178	227.2749705	319.8202821	270.9002865	349.8200578
ACAD11	363.7467066	308.2484575	312.3711475	269.9100047	222.5214627	246.8504266	347.3782903	342.6267482	401.4646872
ACAD8	665.0536367	501.9301118	540.2784075	429.3302893	367.3250378	510.609392	533.0732166	478.5135138	528.0287841
ACAD9	1715.836216	1174.32609	1361.610487	1265.491942	1059.172531	1305.897015	1310.54183	1177.866027	1382.266309
ACADL	10.11032561	5.983392224	7.730833085	4.267416847	2.479409654	4.844083402	8.962887324	8.32488882	8.11060967
ACADM	1015.68555	706.7910033	793.8226706	622.3139981	613.0774337	726.7452211	817.5828242	703.3043842	765.4732005
ACADS	388.7766304	272.3003051	307.6261545	232.4697244	218.1816213	235.2774685	332.7597153	285.3205281	347.7233512
ACADSB	279.4822376	206.8052373	299.2201691	231.1548291	212.678056	187.1368391	322.0978315	246.3030193	235.9535815
ACADVL	7586.255972	5119.265593	5491.85838	5701.348583	5027.883386	6202.894634	6854.897594	6162.399363	6982.62395
ACAN	0	0	0.422746952	0	0	0	0.419055491	0	0
ACAP1	117.8412561	64.14917702	74.05960212	56.95264125	108.6420006	92.33733858	164.9884309	211.5488785	189.3760984
ACAP2	641.1492401	428.7071131	578.5867903	517.9328618	437.1547847	515.3055559	526.9434034	478.3315394	576.5143425
ACAP2-IT1	55.62511444	7.703301296	38.72399077	35.05015485	38.49297458	62.64939053	37.74358293	39.28819006	24.21270192
ACAP3	2820.801345	1878.98256	2186.787419	1140.735209	1067.878472	1304.821049	2515.854193	2380.960322	2547.833134
ACAT1	2650.932009	1995.913036	2249.010534	1854.099997	1668.805085	1876.741796	2232.289967	2125.078303	2380.857522
ACAT2	2980.896032	1923.137343	2200.932033	1593.184783	1499.578619	1789.968058	2341.632094	2072.497368	2278.810877
ACBD3	1003.040388	699.2108287	790.996926	969.6842269	804.8224978	1034.396016	801.8199396	772.3618486	790.6223155
ACBD3-AS1	0	0	0	0	0	0	0	0	0
ACBD4	272.2371141	189.6809159	199.0037871	132.3101684	92.25189751	145.3407244	250.6792489	184.0682237	220.4915892
ACBD5	626.0920874	511.2643377	564.5015421	468.2325836	379.2606125	532.5890476	614.8450215	578.2795152	660.6105453
ACBD6	1525.219873	1017.410069	1129.327284	1079.769075	850.2218346	1097.952639	1235.4382	1083.584066	1263.303643
ACBD7	21.48097155	25.63578414	31.79024346	23.43618407	7.779246032	17.06057035	39.46362736	29.82658925	32.2588583
ACCS	545.4744166	362.0121718	456.8998013	284.9327549	268.1871986	378.5195211	497.9095734	377.3046785	466.5981356
ACCSL	0	0.960169474	0	0	2.826832293	0	0	0	0.944876099
ACD	1373.198217	937.313103	974.5758333	915.6572836	794.1444817	1238.059062	943.3867612	907.4468561	1073.671586
ACE	174.7268709	102.4494065	93.33884593	84.53139943	70.1129322	76.28037924	105.2113139	107.3194302	140.3448229
ACE2	0	0	2.776411477	0	0	0	0	0	0
ACE3P	0	0	0	0	0	0	0	0	0
ACER1	5.015559255	6.376092198	2.228268254	8.442903816	0	6.134295566	1.995420126	5.213474829	7.462476626
ACER2	8.532126392	9.696176362	9.151555995	1.806481219	2.379487315	5.402809202	12.13366861	18.30323191	16.99745296
ACER3	501.9175049	290.0418706	329.4663094	423.2032323	373.4925335	506.6366877	399.9738803	271.1642891	376.7911402
ACHE	1.699456014	3.163588243	3.249155656	7.043709474	11.38674006	5.46018013	1.712630665	0.575616359	3.633564309
ACIN1	4985.383031	3341.617191	3959.992772	3653.691022	2965.178168	3695.232471	3874.962003	3516.848684	3768.91732
ACKR1	0	0	0	0	0	0	0	0	0.881819879
ACKR2	1.66133816	0	2.740502653	0.571414341	0	0	2.263331277	3.468242146	0
ACKR3	0	3.039173126	6.077627813	0	0	0	0	0	0
ACKR4	6.340379792	4.2186688	3.113370967	43.71496989	59.93377826	56.85101202	3.139425115	2.094451422	0
ACLY	5029.51099	3599.374112	3944.04221	3711.140362	3248.414321	3909.608334	4142.979054	3814.08663	4337.696972
ACMSD	0	0	0	0	0	0	0	0	0
ACNATP	0	0	0	0	0	0	0	0	0
ACO1	1749.047822	1251.383389	1473.271893	1976.620404	1550.017662	1952.258244	1393.998159	1251.67584	1471.068865
ACO2	2050.411839	1441.921082	1499.029858	1466.275662	1317.654633	1650.027749	1588.511659	1347.315978	1753.448374
ACOD1	0	0	0	27.44392085	28.67573531	38.29626276	0	0	0
ACOT1	190.5801465	117.7919119	151.4960094	199.4816713	174.6114834	185.6745705	197.994059	173.5926855	211.8784373
ACOT11	89.30235864	80.78165717	90.55764344	36.88446169	39.44254346	43.71199943	80.02550764	83.41226961	93.20128453
ACOT12	0	3.978814321	0	0	0	0	0	0.843784329	0
ACOT13	536.3748144	356.8575981	405.4871168	293.0781071	316.8610307	343.5297896	460.8148219	364.4291486	448.6651293
ACOT2	862.7291066	648.8151695	681.5825722	624.5694918	674.8057708	840.1588696	777.445509	701.7626511	824.1293753
ACOT4	24.90593578	21.07650909	17.62629943	15.77858957	18.55620769	22.31644577	40.5339771	34.11720696	37.57492484
ACOT6	1.937617567	0	3.019543154	0	0	0	0	2.332367885	0
ACOT7	3832.455767	2603.183649	2816.21999	2607.365384	2335.921743	3098.7873	3038.134845	2960.270296	3438.906453
ACOT8	885.2523464	613.0614344	642.5110912	485.4886801	529.923807	589.6799924	630.1652384	593.1715872	726.5697427
ACOT9	1611.414306	1113.580034	1313.348244	1978.515192	1449.552644	2001.87759	1400.423685	1236.067995	1324.129387
ACOX1	614.7871122	487.593986	454.0584267	524.024411	434.5759979	521.9573727	454.0749979	391.0967592	451.558542
ACOX2	3.644877236	6.839417183	7.582074732	9.977783371	1.408589255	3.511314797	10.72497695	6.942208807	6.898731988
ACOX3	492.7068506	309.8588967	366.1097941	329.5050262	312.5307068	407.8954074	461.340336	367.0602618	437.3777166
ACOXL	0	0	0	0	0	0	0	0	0
ACOXL-AS1	0	0	0	0	0	0	0	0	0
ACP1	2587.066655	1906.676219	2492.040745	2186.789116	1811.646171	2399.543623	2296.093114	2070.32901	2464.971914
ACP2	1518.968395	1134.776556	1133.586322	1103.717631	1158.855797	1293.217223	1251.839328	1148.235026	1333.700714
ACP4	0	0	0	0	0	0	0	0	0
ACP5	83.66136643	74.37855182	101.1481614	66.39924566	59.46930633	72.53011749	85.04754685	88.61145642	131.2793158
ACP6	659.4897507	319.3149824	315.3352857	199.6248589	252.7838939	203.2082749	448.1855989	416.4054256	546.4781421
ACP7	36.76956262	32.77335525	23.07763371	48.55272197	38.80273611	47.7878419	34.97035215	29.78321324	35.2710757
ACPP	8.518980234	0	1.078071137	0	4.312152092	3.898800913	0.536837886	5.65067891	0
ACR	0	0	0	0	2.998215347	0	0	0	0
ACRBP	4.278173868	4.003443962	5.160956643	5.405261069	6.327067105	2.597886269	7.347422691	4.336669817	6.20097609
ACRV1	10.73602869	6.346158702	5.470237402	3.131088518	7.209014067	3.664867225	4.554616514	11.45077699	1.831854391
ACSBG1	24.91418964	25.26728434	12.76010823	20.81440969	5.163365949	5.86712786	26.61067115	12.16659745	7.787483484
ACSBG2	0	0	0	0	0	0	0	0	0
ACSF2	922.8189323	602.1813389	705.8790188	376.0778643	361.6631504	558.739657	752.4919668	668.9941959	837.3713696
ACSF3	650.5767759	514.8612959	473.469352	459.7320245	393.3424845	400.2137866	648.210852	547.44213	639.7869473
ACSL1	738.5456399	534.9658683	584.6760873	561.7016844	496.3956939	632.0198212	560.9696429	492.9193045	602.1459572
ACSL3	2509.10817	1953.783016	2188.226405	2932.650371	2534.675613	3150.435865	2388.582026	2114.22625	2253.097345
ACSL4	2552.516932	1867.953721	2119.199612	3058.974589	2576.237809	3302.26294	1994.347136	1891.272809	1985.617857
ACSL5	18.7259211	19.24590621	17.22606072	125.4234951	92.36356339	114.1475289	29.05640137	12.55151296	17.59698409
ACSL6	11.15700587	4.618540788	4.506960657	6.164080815	7.595551565	5.109026118	6.849050062	1.496658381	6.749970892
ACSM1	0	0	0	0	0	1.115395597	0	0	0
ACSM2A	3.511284663	0	0	0	0	5.580076073	0	0	0
ACSM2B	0	9.818336803	8.523910541	0	0	0	0.727209172	0	0.715971542
ACSM3	6.437475271	6.254468584	11.55739979	1.002261781	2.475002986	4.863601347	6.250490037	14.38563854	12.89272677
ACSM4	0	0	0	3.079085702	0.823910686	0	0	0	0
ACSM5	3.996281832	0	1.681998742	4.724085844	1.628263941	2.352630484	0	1.657596396	2.328270999
ACSM5P1	0	0	0	0	0	0	0	0	0
ACSM6	0	0	0	0	0	0	0	0	0
ACSS1	116.0062866	80.7818719	90.12538563	58.69260305	62.60919379	64.55457284	80.14359471	68.1409135	88.27591401
ACSS2	896.9377497	592.1430747	621.6081234	338.6521005	383.5285389	505.5145608	624.7486954	811.6620694	730.0366258
ACSS3	166.2736515	110.9384298	117.6860961	68.13746033	73.45673029	80.88103754	117.3143627	124.4699401	152.815527
ACTA1	3.282607552	0	0	1.659388273	0	1.654124658	1.675409499	0	4.873249059
ACTA2	1472.454828	987.4610916	1086.674336	904.1027666	941.0536265	1112.267826	1297.252325	1181.077248	1428.254121
ACTA2-AS1	20.97583494	5.407805893	9.330934092	10.00720196	4.614508596	3.399248563	21.14880774	11.54285792	35.90303497
ACTB	281496.8388	197427.8544	214962.9714	191282.7691	165745.6307	203395.4179	233716.1629	216485.6458	257378.4592
ACTBL2	0.826977351	0	0	0	0	0	0	0.820467399	0
ACTBP1	0	1.69609541	0	0	0	0	0	0	0
ACTBP11	1.641558895	0	0	0	0	0	0	0	0
ACTBP12	0	0	0	0	0	0	0	0	0
ACTBP13	3.570382344	1.141359456	2.910512199	1.217235873	3.316017905	0.837666234	1.743225143	4.529651159	3.44520165
ACTBP14	1.721276234	0	0	0	0	1.721381297	0	0	1.690696581
ACTBP2	6.594508824	0	0	3.320626449	1.644936594	0	1.67987807	0	3.243728027
ACTBP6	0	0	0	0	0	0	0	0	0
ACTBP7	4.968107029	6.693013617	6.676930437	1.663447782	0	4.96668313	10.1066892	3.349423536	1.625867156
ACTBP8	0	0	0	0	0	0	0	0	0
ACTBP9	0	0	0	0	0	0	0	0	0
ACTC1	702.1656598	511.7544181	514.5020857	372.3995643	403.2580561	412.2837622	682.9600606	628.421364	729.8604337
ACTG1	217241.5835	153035.0317	170572.5224	131405.4136	112359.152	138448.7189	188710.5624	170677.072	205424.8387
ACTG1P1	1.649542635	0	0	3.307702825	0	6.585179795	1.672108849	3.333669482	3.23950995
ACTG1P10	0	0	0	0	0	0	0	0	0
ACTG1P12	0	0	0	0	0	0	0	0	0
ACTG1P13	0	0	0	0	0	0	0	0	0
ACTG1P14	6.612097063	5.010338892	6.734944297	1.663088078	1.647117213	3.311769869	3.364707113	6.691935766	1.625786556
ACTG1P15	0	0	0	0	0	0	0	0	0
ACTG1P16	0	0	0	0	0	0	0	3.501984211	0
ACTG1P17	29.53428366	9.170772656	6.171360754	2.675524324	4.957842573	6.44196371	10.40125944	14.52558666	25.22727032
ACTG1P18	0	0	0	0	0	0	0	0	0
ACTG1P19	0	0	0	0	0	0	0	0	0
ACTG1P2	0	0	0	0	0	0	0	0	0
ACTG1P20	40.12675511	5.865547874	17.6877761	17.53201456	45.94667231	69.80873023	41.72124598	46.66718408	39.00506785
ACTG1P21	1.911115154	0	0	0	0	0	0	0	0
ACTG1P22	0	0	0	0	0	0	0	0	0
ACTG1P23	1.74483727	0	0	0	0	0	0	0	0
ACTG1P24	0	4.589895678	4.577900745	2.280030576	4.512723644	0	4.621898977	9.173932257	4.442844011
ACTG1P3	10.05759091	3.385791837	5.087810794	11.77023616	14.98387615	16.73721463	8.504122484	6.776430551	8.228715824
ACTG1P4	0	0	0	0	0	0	0	0	0
ACTG1P9	1.88269184	1.25570369	0.633527481	0.624033791	0.617206141	0	1.258029721	0	0
ACTG2	1218.327927	812.3893963	966.2927776	726.2108197	716.7267926	814.7878515	1124.801025	959.6974444	1216.612407
ACTL10	72.58074634	40.96001593	50.83548697	31.1769214	31.51129008	55.03801186	61.89364554	45.87361725	54.65120479
ACTL6A	2437.35347	1771.237266	2101.244797	1924.264976	1569.822888	2057.640526	2039.592435	1989.698343	2071.275903
ACTL6B	0	0	0	0	0	0	0	0	0
ACTL7A	0	0	0	0	0	0	0	0	0
ACTL7B	0	0	0	0	0	0	0	0	0
ACTL8	3.104173975	3.124120693	0	0	1.029275058	1.854261039	0	3.750535243	3.06562846
ACTL9	0	0	0	0	0	0	0	0	0
ACTN1	17177.05909	12306.7098	13579.70793	15359.92084	13272.66347	16196.6831	13826.24336	12731.70111	15287.52235
ACTN1-AS1	42.48850133	38.71408044	26.21652508	36.9732827	14.67368304	14.88954406	36.02556967	29.85467661	5.289898339
ACTN2	50.05483536	38.18038812	70.19926119	197.1251524	177.3095229	183.9323193	55.49282363	46.72640722	92.11291322
ACTN3	3.05014867	1.136914525	0	0	1.047946611	1.133111019	1.144995183	1.14543839	1.119617325
ACTN4	24099.10323	17233.24322	18512.90052	14446.88929	13376.37206	15993.91565	19734.0825	18386.36186	21781.91795
ACTN4P1	1.199721942	0	0	0	0	0	0	0	0
ACTN4P2	0	0	0	0	0	0	0	0	0
ACTP1	0	0	0	0	0	0	0	0	0
ACTR10	2984.710699	2033.341308	2436.224273	2051.811183	1832.967359	2770.749886	2431.294634	2136.531942	2449.984039
ACTR1A	4397.472637	3139.437366	3627.300693	3684.91694	3094.394267	3901.080485	3483.033353	3236.433787	4067.645746
ACTR1B	1697.500148	1147.106794	1346.241059	1178.057506	1053.133124	1347.763766	1346.592891	1345.184062	1579.138333
ACTR2	6673.692424	4869.31002	5740.818481	5276.182963	4525.18552	5703.946693	5769.849308	5319.927903	5870.094767
ACTR3	10884.46297	8155.995253	8798.184608	10027.91501	8752.589226	10924.38941	8857.928916	8065.475659	9309.468003
ACTR3B	225.5811007	216.5013922	199.1041137	77.70600415	85.66188405	98.9380933	160.8407591	200.7240982	146.9758547
ACTR3BP1	0	0	0	0	0	0	0	0	0
ACTR3BP2	0	0	0	0	0	0	0	0	0
ACTR3BP3	0	0	0	0	0	0	0	0	0
ACTR3BP4	0	0	0	0	0	0	0	0	0
ACTR3BP5	0	0	0	0	0	0	0	0	0
ACTR3BP6	0	0	0	0	0	0	0	0	0
ACTR3C	162.8552603	88.39614575	169.519986	83.02961258	73.44678121	79.24496628	147.9931854	112.1782643	114.754986
ACTR3P2	0	0	0	0	0	0	0	0	0
ACTR3P3	0	0	0	0	0	0	0	0	0
ACTR5	189.027099	134.7008581	148.0020855	116.9629402	108.0215235	121.2797744	136.5045652	129.4264633	140.9312699
ACTR6	772.8846941	488.3215159	526.7000334	684.0803684	591.1507153	756.7158554	598.3892291	628.6286566	685.1745566
ACTR6P1	0	0	0	0	0	0	0	0	0
ACTR8	784.9465638	511.4216496	554.1195515	650.4465452	604.7535552	664.4956809	645.6437594	524.544532	604.3616565
ACTRT1	0	0	0	0	0	0	0	0	0
ACTRT2	0	0	0	0	0	0	0	0	0
ACTRT3	89.81661951	74.58374872	86.6807949	66.16757106	56.02522247	69.19547811	87.46184474	62.83340302	65.71648332
ACVR1	1081.007307	719.9067272	827.4905376	851.8321516	718.5292562	924.7155614	802.3873719	763.8965928	973.4042969
ACVR1B	278.7217414	211.5895934	223.8155752	218.064225	197.4846587	213.3814894	255.9251991	233.3449959	288.7499609
ACVR1C	14.63638559	11.19907833	6.741442988	7.605129202	8.051232869	8.80450807	6.992729858	5.455766127	13.81750656
ACVR2A	113.7069696	65.87314451	63.22796852	71.40628951	43.57354514	71.50180628	70.42044095	60.16726794	89.77765687
ACVR2B	32.56036106	15.12786034	22.53079497	16.63848594	7.043900294	10.70833849	16.22528022	24.92219173	19.29050168
ACVR2B-AS1	4.681142616	4.656719952	4.05890676	2.662138224	2.619559879	6.62877832	6.021399598	2.015332097	4.665219953
ACVRL1	15.93539403	12.07745678	5.951662313	26.64283597	6.180193305	15.1613589	22.58080706	21.6965434	20.00400148
ACY1	1018.751186	664.1943295	733.0152272	718.941602	627.0303766	759.7508254	742.8648112	764.0381931	861.1391316
ACY3	5.187599838	2.079733738	5.394956947	5.254494012	5.207864213	6.540201213	2.643921512	4.178384627	2.029298005
ACYP1	1126.139866	816.3073344	910.1559243	580.5906796	475.2481608	713.5543578	855.0976468	860.348495	1019.391518
ACYP2	346.042434	283.7217802	271.4869824	260.8342287	253.1772004	221.8243663	311.9122568	222.7804717	323.5724965
ADA	233.3747012	180.9979476	159.149878	200.9384439	140.3585642	208.7862105	241.8195703	254.1685273	223.9234112
ADA2	19.59401771	8.695358318	14.99755529	4.109455725	4.041732575	8.654588853	30.47926043	14.37169957	28.38376207
ADAD1	0	0	0	0	0	0	0	0	0
ADAD1P2	0	0	0	0	0	0	0	0	0
ADAD2	1.790368597	0	2.702862425	0	0	0	0	0	0
ADAL	390.4437913	254.3700769	341.9197695	193.7598714	175.5821089	207.6785601	267.3978238	267.9844834	310.5747476
ADAM10	3255.863435	2563.500252	3068.021252	3051.120211	2621.773185	3342.11278	2984.174081	2726.858654	3192.56853
ADAM11	21.55096433	19.67710745	17.75847901	15.48293918	9.466250408	16.80554151	30.84088463	15.27703408	16.35557987
ADAM12	1115.886074	890.8625454	913.2298999	1007.659129	900.1402098	1174.894628	1048.508272	956.5899399	1199.012897
ADAM15	2063.424735	1437.193801	1681.225682	1378.819259	1238.820064	1577.21579	1823.838167	1700.482352	1910.701425
ADAM17	553.3986983	374.4367841	454.579911	617.3465987	588.8522516	673.9020626	457.0565505	461.5684582	557.924364
ADAM18	0	0	0	0	0	0	0	0	0
ADAM19	928.5024244	644.8921423	746.3101729	573.911144	490.4441022	625.7967232	789.4291758	721.672843	817.8580353
ADAM1A	0	0	0	0	0	0	0	0	0
ADAM1B	0	0	0	0	0	0	0	0	1.796766439
ADAM2	0	0	0	0	0	0	0	0	0
ADAM20	1.268394107	3.790881787	0.630491597	3.715863266	1.844395122	2.470977384	0.62935762	3.160142186	5.076710821
ADAM20P1	5.859584591	0.742153133	3.725718408	3.902138175	6.556259287	5.36782899	2.224662903	5.685142358	3.001605038
ADAM20P2	0	0	0	0	0	0	0	0	0
ADAM20P3	0	0	0	0	0	0	0	0	0
ADAM21	1.930054025	4.458415913	0.64071399	0.632769442	1.251834522	2.524827759	2.545714505	0	3.848175764
ADAM21P1	0	0	0	0	0	0	0	0	0
ADAM22	15.88713143	2.239321785	2.325630027	0.758434349	1.837149105	0.576075084	2.995491423	8.386508812	5.255508922
ADAM23	167.0797691	101.7511444	116.8714591	92.12753605	96.52030093	90.76905908	136.599954	102.7390961	133.0201188
ADAM24P	0	0	0	0	0	0	0	0	0
ADAM28	5.785900077	4.346240461	0.26492838	1.827600939	10.2749649	6.955232133	0.26796193	8.23946322	20.93479941
ADAM29	0	0	0	0	0	0.568752334	1.525585418	0	0.77658289
ADAM30	0	0	0	0	1.128856676	0	0	0	0
ADAM32	50.49961369	18.10824013	18.17868815	15.5259751	25.38041058	73.30517421	21.39663571	18.52416099	29.30999266
ADAM33	1395.347722	778.85424	990.051161	239.8907369	186.6153842	231.9454203	1070.151212	911.1401462	1137.951666
ADAM3A	1.764376422	0	1.903689482	0	0	1.707975032	1.726468002	0	0
ADAM3B	0	0	0	0	0	0	0	0	0
ADAM5	0	0	0	0	0	0	0	0	0
ADAM6	0	0	0	0	0	0	0	0	0
ADAM7	0	0	0	0	0	0	0	1.049610926	0
ADAM8	158.7581913	76.12006283	119.8438749	58.23834921	67.61653188	99.62995233	222.1464067	208.1163098	231.1264895
ADAM9	6805.416652	4654.772235	5461.118173	5205.714266	4404.365033	5607.906409	6186.257069	5641.857967	6431.257997
ADAMDEC1	0	0	0	0	0	0	0	0	0
ADAMTS1	3534.099759	2410.444277	3008.265103	4898.668007	4272.482423	5581.180485	2863.046834	2433.635292	3173.419401
ADAMTS10	63.14234546	20.44041158	40.07232681	36.47208758	6.004312723	30.65604373	91.00526931	83.13611989	92.41502962
ADAMTS12	552.4350069	379.4149563	434.5792651	834.3346943	719.8468501	1090.905816	452.5977035	409.6045378	470.2063646
ADAMTS13	28.67059912	9.126709864	13.45131752	5.010101332	10.39662529	7.549839407	21.62948382	23.37938817	21.04293801
ADAMTS14	5.061750891	3.886608848	4.324048601	3.902446492	3.455168679	1.795341069	2.41368854	3.207776674	3.253641851
ADAMTS15	0.56339389	0.282092058	1.443468328	0	0.842241517	0.281418903	1.134356937	0	1.396855132
ADAMTS16	0	0.645481257	2.615367278	1.017343626	1.903408134	1.27700305	1.288852706	1.026084562	1.514558286
ADAMTS17	0	0	0	0	0.257790096	0.259732298	0.260954398	0.525003261	0.258914697
ADAMTS18	0	0	0	0	0	0	0	0	0.297898325
ADAMTS19	1.469698397	2.214713617	4.041663883	0	0	0.355294181	0.36596582	1.098525285	0
ADAMTS19-AS1	0	0	5.44488302	0	0	0	0	0	0
ADAMTS2	713.1037431	548.4427697	571.5581954	617.3395588	557.9340446	621.3013153	609.3620848	574.4425304	608.2803306
ADAMTS20	0	0	0.361602335	4.305134305	4.080006988	6.921547485	0.687855279	0	0
ADAMTS3	27.73947299	16.7670091	15.37860626	13.31333751	16.06139741	15.76787972	20.09285392	15.37183765	22.90625334
ADAMTS4	15.14158222	10.47528469	11.64394622	19.89595877	18.46057844	22.95332784	12.9451205	13.15917265	15.24165829
ADAMTS5	558.9234461	378.5379951	417.4911948	221.8051133	218.2043815	242.5793202	421.0477887	405.8328033	520.9180736
ADAMTS6	382.3722606	269.8430743	283.124169	416.2352146	424.7819277	417.1656141	293.8092627	258.9145	296.516945
ADAMTS7	335.053717	234.9964702	271.7419967	207.6636361	180.572479	254.6680252	290.7144218	255.3894316	305.594972
ADAMTS7P1	1.424437197	0	0.347490215	0	0	0	0	0	0.693672155
ADAMTS7P3	1.518981481	0.914947135	0	0	0	0.460093995	0	0.943288515	0.657643867
ADAMTS7P4	82.40137626	55.02830784	101.0932308	39.49390338	35.40514941	42.69988277	85.47665663	65.4615841	42.06685437
ADAMTS8	0	0	0	0	0	0.742217008	0	0	0
ADAMTS9	0	0	0	0	0	0	0	0	0
ADAMTS9-AS1	0	0	0	0	0	0	0	0	0
ADAMTS9-AS2	0	0	0	0	0	0	0	0	0
ADAMTSL1	251.1440142	192.0976699	227.9380932	146.4243082	147.8463568	157.3951252	222.1222611	207.5992418	191.0707712
ADAMTSL2	2.307810963	1.986969964	1.522353896	1.45836553	0.815256353	0.420551147	1.753101701	1.167871046	1.965946251
ADAMTSL3	28.27138213	17.27609325	22.04178034	24.71652217	24.4620291	28.19472674	21.74234063	20.98472545	23.34474527
ADAMTSL4	556.5067441	418.1894406	467.7767123	227.4498854	210.2741503	269.7749141	498.7822142	480.319296	618.2521063
ADAMTSL4-AS1	11.75608647	10.12623952	8.379729733	25.3537879	12.70319815	21.25278821	12.44311716	7.209050365	11.34283874
ADAMTSL5	533.9195144	392.1582723	302.1024096	239.1212288	175.9710996	258.6789487	376.4229617	354.9217284	408.5371664
ADAP1	16.59192155	34.48020868	21.25928105	55.12550278	46.14872033	57.758864	25.81861691	27.29395639	34.91527956
ADAP2	66.77365634	35.30142576	50.43678992	10.58303551	6.763599846	12.27889931	58.48255161	45.50419982	47.36185739
ADAR	3062.228097	2019.347055	2223.366581	4299.067883	4045.730127	4908.686305	2480.941856	2284.384761	2427.551365
ADARB1	476.9504004	441.1438148	326.2841804	241.2799623	235.5254273	298.2643815	422.0393037	365.8299563	405.938025
ADARB2	0.397446161	3.833377044	0.405551511	1.955963621	0	0.196869309	4.935790709	0.975424923	2.910070081
ADARB2-AS1	0	0	0	0	0	0	0	0	0
ADAT1	1836.593548	1284.336796	1429.310361	1127.961554	1052.07893	1280.588127	1348.624187	1207.573658	1363.786135
ADAT2	168.520774	132.4792946	101.2024041	62.25628614	51.16403131	47.46535927	117.4669542	86.52193832	73.78305841
ADAT3	286.6173597	191.6661251	200.0779211	235.1476896	175.413815	233.864375	225.2126589	203.2912643	228.1135198
ADCK1	279.9734477	198.0078604	276.4738975	172.137157	141.9026471	122.3420801	259.8117134	212.952432	242.1222907
ADCK2	471.3330293	376.4307543	374.0024778	214.4093571	222.4589744	251.3974035	423.2370839	409.109949	448.8893859
ADCK5	344.4883661	247.9766559	285.7159133	220.9771792	173.1601676	247.960302	269.340332	231.4083875	316.7342415
ADCY1	2.39046968	0.477067767	2.171819772	1.259809324	0.507516444	4.179825514	0.526910549	3.229069081	0.376026782
ADCY10	3.407225922	0.653726925	1.97408406	0.325223144	0.963833762	0	3.132087518	0.661274663	0
ADCY10P1	23.33944204	22.2939692	18.47909844	17.70027861	15.77787146	16.29007627	24.65376705	12.37279637	23.09829674
ADCY2	2.378944282	1.932406828	4.172112056	1.27823127	2.73785848	0.930411675	3.635309562	1.553507943	0.912259887
ADCY3	1090.269795	978.6324927	912.6433812	662.4147466	820.4788451	829.3389155	998.4213024	939.3404843	1125.323093
ADCY4	31.93729922	35.44948275	23.7426585	87.45159906	81.71752976	92.98247283	21.09597197	33.43522165	26.79789948
ADCY5	1.184684899	0.965902791	0.981918974	0.961795163	0.707497412	9.619586437	0	23.79678915	2.832452093
ADCY6	861.6056504	458.8164732	593.1401103	376.2220282	332.7437082	417.2046782	652.9119665	655.8537792	801.3812596
ADCY7	764.0549783	539.2341399	572.7872543	306.1031167	288.1226253	384.2065093	622.5199194	656.9141178	735.7881214
ADCY8	0	0	0	0.73749448	0	0	0	0	0
ADCY9	401.2420992	251.108013	308.6908725	178.6740703	139.8926158	163.4198611	315.9940427	298.4218273	319.2089899
ADCYAP1	0	1.089330145	1.090214676	2.122891632	5.962063223	2.979514184	0	0	0.621266312
ADCYAP1R1	0	0	0	0	0	0	0	0	0
ADD1	5019.296395	3589.017574	3955.263006	3524.498787	3208.059529	3914.380288	4191.727534	3886.181509	4568.785714
ADD2	1.776682186	1.679668492	0.536402887	0.861360871	2.127375915	2.746453594	1.824370333	1.364994517	1.355023631
ADD3	1141.887673	784.5898542	947.9054198	582.5165566	504.3872096	639.976721	1575.225048	1233.603102	1545.697822
ADD3-AS1	11.70317169	7.754944092	5.781439307	0	3.264500772	6.626243522	7.988967324	10.54313871	10.85351494
ADGB	0	0	0	0	0	0	0	0	0
ADGRA1	0	0	0	0	0	0	0	0.492517797	0
ADGRA1-AS1	0	0	0	0	0	0	0	0	1.237535411
ADGRA2	1456.622983	1029.89238	1178.756041	1011.830968	864.689858	1132.005396	1296.543599	1209.04458	1378.844723
ADGRA3	433.6083293	319.934653	324.4118222	236.7399932	206.3559862	259.2858919	338.0256725	307.8704898	370.7575439
ADGRB1	1.58450217	1.585487494	5.767256033	0.862825377	1.604299843	0	0.316963875	0.648592301	0
ADGRB2	310.5297701	241.2801636	259.6348646	209.0454362	155.0087601	185.0887787	227.9126407	210.2044782	258.2254038
ADGRB3	8.206503872	6.094365182	4.156126225	8.342829227	5.766420779	3.535170063	3.864603119	5.842124406	7.63936719
ADGRD1	3.402723813	1.436335371	0	1.79926146	2.35145727	8.393814471	15.30274878	3.287710463	7.158049685
ADGRD1-AS1	2.925860454	1.891436161	1.90338115	0	3.705621899	1.44458136	1.4618575	4.399430058	4.364473754
ADGRD2	6.568996875	1.591650272	4.826819577	0.791372892	1.565162268	0	0.85255767	2.606190561	4.086537411
ADGRE1	135.202678	88.06056421	106.9643236	162.1675441	185.9077959	230.6574613	90.12112697	99.76856109	106.5181833
ADGRE2	39.89633718	35.60492649	40.79135714	44.58591429	20.82536929	26.5185775	68.17361292	22.23280953	42.83113229
ADGRE3	0	0	0	0	0	0	0	0	0
ADGRE4P	0	0.95937497	1.798880305	0	0	0	0	1.937934781	0
ADGRE5	2338.783191	1686.822168	1745.397953	2213.045991	2093.855161	2535.675905	1891.375364	1778.220323	2169.262717
ADGRF1	1.568234551	0.466674789	0.19268381	2.004986039	1.718032772	0.545037891	0.728707159	1.928114676	0.760247917
ADGRF2	0.681829364	0.646662277	0	0	0.700705691	0.334537002	1.009567011	0	0
ADGRF3	3.758150293	11.84290616	1.916900324	4.376509711	4.728968398	11.39332539	1.00443831	3.919105945	5.353921762
ADGRF4	2.766545832	2.669535257	0.554381017	2.726679268	1.614839503	1.08725934	2.757336894	1.65901589	1.104652555
ADGRF5	0	0	0.296449402	0	0	0	0	0	0.297683391
ADGRF5P1	18.46738	0	1.674978258	10.35924869	0	3.61152381	12.31654996	17.31859191	6.939058952
ADGRF5P2	0	0	0	0	2.072701427	0	0	0	0
ADGRG1	45.72935933	62.34852911	50.70560802	80.59095286	50.46012283	112.1192117	69.7474132	41.68036285	50.23490511
ADGRG2	3.427365355	5.137760242	5.028278992	2.813804539	3.174300361	3.806562431	4.17532115	2.872147844	2.396781166
ADGRG3	0	0	0	1.511267605	0	1.504374427	0	0	0
ADGRG4	0	0	0	0	0.175676148	0	0	0	0
ADGRG5	0	0	0	0	0	0	0	0	2.670472565
ADGRG6	908.3354383	677.0112767	732.359903	396.3699077	328.1492113	424.5009533	759.910912	776.4730283	729.8655115
ADGRG7	0	0	0	0	0	0	0	0.888160962	0
ADGRL1	35.71369806	16.60664802	55.52398405	6.818381067	29.12280771	10.48395254	44.94648797	28.18439785	58.96930656
ADGRL2	124.5159024	125.3603836	118.2539252	120.0112969	109.9677263	125.1216268	95.7549288	89.90435927	94.40429619
ADGRL3	4.457147699	1.34095188	2.497631873	0	0	0.80885403	0.821556958	2.779578234	3.043060405
ADGRL3-AS1	0	0	0	0	0	0	0	0	0
ADGRL4	0	0	0.845185571	0	0	0	0.854284164	0	0
ADGRV1	15.90474968	24.78575017	11.44170412	13.12439052	12.43757145	9.713289469	20.1305321	11.59493706	15.63624998
ADH1A	0	0	0	0	0	0	0	0	0
ADH1B	1.482184245	0	1.468087456	0.478122728	0.996929204	1.860626199	1.903535133	0.502128468	0.496470341
ADH1C	1.255428034	0	0	0	0	1.23777001	0	0	0
ADH4	8.159771983	3.063480671	6.097361064	3.968888825	2.959395779	1.979226579	5.14596589	6.095911276	2.040125298
ADH5	4358.254258	3138.410566	3629.083208	3036.420244	2740.170958	3367.773385	3430.44147	3406.656338	3609.317029
ADH5P2	0	0	0	0	0	0	0	0	0
ADH5P3	0	6.648864932	0	0	0	0	0	0	1.649939748
ADH5P4	0	0	0	0	0	0	0	0	0
ADH6	0	0	0	0	0	0	0	0	0
ADH7	9.736080316	0	9.623612356	7.45382259	4.713249767	0	0	7.855338897	4.864893505
ADHFE1	27.32515892	35.2846338	31.61150575	20.36871164	23.20272141	25.40267495	22.66461816	48.16898522	26.09549564
ADI1	2654.464364	1887.778348	2001.844475	1930.348586	1776.521254	2082.915081	2225.999844	2001.229333	2351.503737
ADI1P1	4.781659698	0	0	0	0	0	0	0	0
ADI1P2	0	0	0	0	0	0	0	0	0
ADI1P3	0	0	0	0	0	0	0	0	0
ADIG	0	0	0	0	0	0	0	0	0
ADIPOQ	0	0	0	0	0.37054629	0.375600729	0.378178221	0	0
ADIPOQ-AS1	0	0.477389864	0	0	0	0	0.477756267	0	0
ADIPOR1	1879.730774	1484.97305	1559.293237	1682.714285	1455.671871	2007.829831	1691.425391	1476.037838	1611.969023
ADIPOR1P1	0	0	0	0	0	0	0	0	0
ADIPOR1P2	0	0	0	0	0	0	0	0	0
ADIPOR2	1647.711237	1194.534571	1357.711177	1292.620506	1108.309744	1402.948627	1325.909779	1231.092483	1408.738637
ADIRF	227.7483558	112.0572855	104.8603369	159.3456976	120.1767047	93.23558649	137.8639249	168.7535847	189.0467391
ADIRF-AS1	317.6566383	167.4815357	220.2296735	86.19466736	56.04512062	68.14164994	253.0203486	268.2647287	296.4786062
ADK	2292.58189	1600.420078	1968.451806	1849.45168	1519.739581	1883.943805	1954.068274	1806.028113	1802.872226
ADM	8818.071106	6524.74273	7160.287357	23938.15078	22450.1041	28398.81572	11033.87304	10209.37307	12045.8358
ADM2	32.6095541	30.22570129	26.88484665	21.92571295	15.82950217	23.22793095	24.28061598	30.26800527	31.22336071
ADM5	8.497910365	14.84512409	10.72077636	23.25039733	8.83443866	19.78849176	8.799149737	12.22810109	8.035275353
ADNP	1056.436088	790.9581302	830.7861802	748.044166	604.9659612	800.9515723	841.7371777	779.2551663	881.1942336
ADNP-AS1	56.56467452	26.40222334	20.06235977	22.50642819	32.23087176	26.41611534	28.94049781	33.16184111	34.61026156
ADNP2	418.4589134	313.0864104	322.2861336	349.7111263	520.4931507	348.1376862	345.9417209	287.1982392	326.7027663
ADO	693.0289302	461.1919988	527.7282971	482.3852887	387.6857534	500.7206945	496.387314	459.4041723	527.8392661
ADORA1	75.09799541	76.94782919	68.81167212	12.42201849	6.329406728	18.00821865	103.6041009	67.21149413	69.85471232
ADORA2A	28.88928155	26.78180325	28.41844281	1189.061729	1084.064006	1430.105382	7.374716521	3.071132946	25.68507944
ADORA2A-AS1	0	0	0	4.543694654	4.535074993	3.231247787	0	0	0
ADORA2B	311.3010714	217.8147082	235.2534607	157.1426949	112.2900178	151.1828705	313.7366526	332.5708915	322.3811987
ADORA2BP1	2.409408551	0	0	19.29286485	7.130693488	9.60972889	0	0	0
ADORA3	0	0	0	1.540480649	0	0	0	2.779997101	0
ADPGK	1490.280778	1110.580113	1257.525131	1589.434414	1522.514782	1665.139228	1370.650104	1141.846233	1465.641919
ADPGK-AS1	1.276527917	0	0	0.643868857	1.261692739	5.269338007	0.635146451	0	0
ADPRH	37.58975679	15.8854741	14.23158734	15.83904542	10.85051213	13.27341321	27.26546915	27.74947426	18.09463657
ADPRHL1	37.26578505	22.90363333	27.59740201	23.89601331	23.63109955	34.92534761	50.92142459	30.71814768	50.34884692
ADPRHL2	1667.503888	1107.347167	1222.628821	1764.038236	1780.595242	2193.950469	1602.435853	1543.822039	1748.355489
ADPRM	182.6161862	100.5878179	182.8973275	178.4287527	184.1264116	190.140631	161.3477642	162.200992	160.6625472
ADRA1A	1.624570938	1.42411718	1.774213741	2.535548365	2.425530184	3.361113936	4.859291818	3.974280039	3.602264566
ADRA1B	1.483204723	0	0.785392872	0.76218554	0	0	0	0.751726668	2.941262357
ADRA1D	147.1267532	122.144852	172.9734709	68.20344019	45.19340461	63.82905734	147.5326687	122.4783671	151.2337482
ADRA2A	0	0	0.509767742	0	0.485801109	0	0	0	0
ADRA2B	0	0	0	0	0.442779306	0	0	0	0
ADRA2C	6.268286024	9.740367993	2.226513133	0	1.620291052	1.61503244	5.185142056	5.317702905	6.242377724
ADRB1	0	0.702406433	0.727046962	0	0	0.691380227	0	2.125447581	0
ADRB2	38.64670186	43.56702154	30.95003864	34.78962691	31.65902705	38.48668242	37.49121022	34.82755888	44.35565814
ADRB3	0	0	0	0	0	0	0	0	0
ADRM1	5411.654964	4092.315973	4302.228321	5176.298246	4420.644606	5440.740848	4571.862457	4339.548062	5012.785945
ADSL	2302.093045	1621.41063	1825.416096	1709.007387	1601.231848	2017.583705	1824.956122	1675.83133	1991.896102
ADSS	1803.117698	1282.839971	1541.940784	1497.149739	1414.63091	1600.758599	1394.198153	1294.678939	1367.551534
ADSSL1	59.09017745	43.95619992	42.64096992	21.69241968	12.76062112	32.54418657	100.9462659	68.60571626	74.96962763
ADTRP	14.85347727	26.7962117	10.7329199	23.89691257	53.98377659	71.00890073	38.68315079	20.0908167	26.68516667
AEBP1	4720.072801	3449.689672	3548.455801	3705.742423	3242.313311	3877.282196	4166.371744	3724.885269	4348.084376
AEBP2	799.2465218	528.8438243	628.8106888	629.16781	504.2562362	662.009382	692.7528327	601.3090097	683.3265284
AEN	757.8853185	544.0839674	579.8456627	757.5892777	672.5638669	865.7983229	450.0135492	438.0171717	524.956412
AES	11553.9821	8556.983241	9307.425031	8447.932211	7391.832743	9359.817892	9862.958524	9346.712853	10899.18057
AFAP1	1276.257461	981.3891443	1070.743768	1183.637377	1021.754147	1218.274259	1043.049912	936.1399447	1112.118229
AFAP1-AS1	0	0	0	0	0	0	0	0.47299394	0
AFAP1L1	516.8100304	385.5603845	439.2456571	364.4820071	301.8653883	381.7003546	565.3549361	634.4517691	656.2065506
AFAP1L2	1.374914001	0.457548723	2.269418723	0	1.344260983	1.340457492	1.357176143	2.276425869	2.693524221
AFDN	790.9430725	588.618309	689.7208542	631.2796022	511.4002405	695.4377343	738.1245205	555.6943919	658.7152317
AFDN-DT	0	0.917438014	0	0	0	0	4.043320574	0.813486282	0.805679561
AFF1	465.5328725	357.9312744	440.7199824	597.5168253	538.4140486	618.9767929	414.6151536	387.5830002	412.4965973
AFF2	0	0	0	0	0	0	0	0	0
AFF2-IT1	0	0	0	0	0	0	0	0	0
AFF3	267.3549673	217.6910876	274.8470901	476.8805697	400.2561382	520.4191165	210.0616131	195.9294671	263.7829754
AFF4	1059.520092	823.3246347	938.0403123	1025.016944	850.6333811	1015.02109	895.7382095	816.6225253	961.7342214
AFG1L	159.6636554	84.17423451	71.11794838	48.26418856	88.5808248	68.46314681	110.9956254	130.2366219	121.5934022
AFG3L1P	817.0726815	626.0751182	826.7531497	628.449945	537.6885383	758.777294	722.8938274	552.9987034	672.440048
AFG3L2	1345.731032	1029.170068	1126.323442	1115.427976	806.3829808	1195.360897	1043.690949	999.6051621	1153.981567
AFG3L2P1	0	0	0	0	0	0	0	0	0
AFM	0	0	0	0	0	0	0	0	0
AFMID	600.3221369	447.6074528	410.0427227	317.8973502	191.8103237	329.9910676	544.6152819	453.5634674	545.2909281
AFP	23.70237203	26.81912349	42.17145137	38.51273563	20.34327069	35.42839235	33.04066572	17.87617372	21.49437971
AFTPH	605.826115	521.608207	546.7746316	513.7470976	465.0322089	555.1630571	568.7077609	513.8018497	541.7087061
AGA	1983.347197	1411.572254	1479.244214	1385.049037	1247.145918	1232.82031	1884.648844	1366.1898	1742.030013
AGAP1	268.7694999	214.6093978	294.5111323	184.9619404	176.6184709	257.286725	291.361806	300.2311001	340.1374219
AGAP1-IT1	0	3.354956472	13.57218368	0	6.585084349	9.983836905	3.390985358	6.699777888	6.480551303
AGAP10P	75.58620408	48.37540596	44.69168635	47.69269714	47.62981518	49.88865429	58.85524568	55.00929299	63.5039542
AGAP11	8.767106455	4.260476917	1.148109947	0	0	1.876905235	4.780837928	0	7.759139081
AGAP12P	31.76102666	14.29904179	22.49168423	5.35223053	11.68898299	7.223948882	15.20398321	16.4942849	18.84548113
AGAP13P	0	37.13550728	17.44974376	0	0	0	12.84511083	0	0
AGAP14P	0	0	0	0	0	0.920497798	0	0	0
AGAP2	8.616405868	5.547488381	6.175416507	3.634236316	1.498153652	3.301433526	8.35127704	7.849055892	5.724413997
AGAP2-AS1	894.3909068	603.4950415	585.375171	626.6169742	545.5018565	713.0320768	737.5147636	677.7152399	797.9896033
AGAP3	2393.722364	1644.06874	1848.778462	1602.661577	1398.366352	1658.948238	1913.639486	1730.170831	1934.637346
AGAP4	320.0821043	149.8165432	218.7718321	193.4533785	198.8154044	193.2467161	204.0271632	249.3015253	209.0179094
AGAP5	212.887315	64.56010765	110.9574133	145.6652315	105.0828436	86.63961972	103.9083192	74.31359379	141.0139388
AGAP6	263.1174325	162.6321162	187.8921881	229.2074726	157.422524	193.9730202	203.1937493	209.8336878	265.5951096
AGAP7P	4.557064499	7.00329985	12.03230229	4.634828047	1.314845336	0	4.759866111	3.320079575	1.38223963
AGAP9	236.0077745	165.3935993	201.6906163	230.1985579	201.5370218	230.6752049	218.0039651	197.4194469	199.5916359
AGBL1	0.170900048	0	0	0	0	0	0.169120184	0	0
AGBL1-AS1	0	0	0	0	0	0	0	0	0
AGBL2	62.54599613	55.09674259	41.75937745	60.83430203	89.30772064	66.30096415	46.64304702	25.79303952	83.93223511
AGBL3	59.17700812	44.28705738	81.8471683	31.06680082	54.83846581	41.21130859	79.66753955	30.36262267	60.98490254
AGBL4	0.838652819	0.414130124	0.835390099	0	0.406640083	0	0	0	1.240705686
AGBL4-IT1	0	0	0	0	0	0	0	0	0
AGBL5	737.7100785	520.017115	576.2845698	412.1335696	378.1135385	453.0076574	569.7599063	518.3459285	595.6461693
AGBL5-AS1	0	0	0	0	0	0	0	0	7.336176119
AGBL5-IT1	0	0	0	0	0	0	0	0	0
AGER	193.523175	114.1729866	94.48702703	138.2956309	146.1002031	124.6590825	186.3052163	95.22092192	138.9276296
AGFG1	1463.673015	1140.396774	1206.351427	1416.376931	1236.379973	1541.649251	1091.330792	1022.908596	1352.172426
AGFG2	670.6415641	426.6207442	449.1050012	303.0584084	246.7343788	304.1388039	455.3545073	389.6682132	521.9741779
AGGF1	473.3747656	355.4930258	328.8266627	289.4568971	254.3846503	332.4113771	391.0053565	342.2044605	393.4699269
AGGF1P1	4.100550671	0	3.294504184	0	0	0	2.751548063	6.443594168	0
AGGF1P10	0	0.89605081	0.874287373	0	0	0	0	0	1.798862044
AGGF1P2	3.958284034	4.385471807	5.430581157	3.418979601	0	1.707158264	2.510169053	1.600956268	3.553259647
AGGF1P3	8.660106337	6.90001426	3.353039837	3.306186932	3.325807977	3.306925588	5.078911934	3.425075573	0
AGGF1P4	0	0	0	0	0	0	0	0	0
AGGF1P5	0	0	0	0	0	0	0	0	0
AGGF1P6	0	0	0	0	0	0	0	0	0
AGGF1P7	0	0	0	0	0	0	0	0	0
AGGF1P8	0	0	0	0	0	0	0	0	0
AGGF1P9	0	0	0	0	0	0	0	0	0
AGK	836.0699597	573.6751173	597.4786742	568.7585487	489.2405366	671.2888831	766.2308173	658.6543008	685.1286951
AGKP1	0	0	0	0	0	0	0	0	0
AGL	197.5017785	151.1875789	170.760216	112.1883931	96.36261489	112.9193911	195.6337902	157.7023138	187.9185244
AGMAT	94.11262173	71.0993739	81.6129071	51.12421497	51.39874318	64.34449442	73.16515921	92.76049708	75.40035508
AGMO	0.847747079	0	0	1.563501658	0	0	0	0	0.808903568
AGO1	331.9223803	231.507221	255.6089968	217.4763414	182.6417959	229.1593394	253.0759772	238.0787749	277.316017
AGO2	516.117396	309.7329141	312.3068247	488.2804399	317.3647538	389.5536656	323.3870651	367.2181048	310.1579909
AGO3	442.3400492	362.5466157	279.3720527	340.0194612	275.9648319	402.0262517	366.7093798	301.6516643	398.1997345
AGO4	335.7331152	255.0318562	277.283696	304.4792877	325.6051327	385.678044	415.8540396	306.6968942	374.1846911
AGPAT1	2631.696059	1763.074419	1947.721243	1877.478911	1617.019419	1922.227929	2238.77361	2028.097232	2406.409585
AGPAT2	1700.851548	1330.730622	1344.213871	888.7518899	810.3497773	1024.606232	1452.191523	1413.366699	1627.584397
AGPAT3	2338.744623	1690.668364	1983.024646	2132.896342	1889.317244	2272.723315	1943.235543	1800.46756	1942.686512
AGPAT4	126.3306424	108.2522314	93.99670792	102.7046365	92.66467059	104.3119213	120.2767461	109.381466	121.1729109
AGPAT4-IT1	15.83094511	14.01737919	8.442842931	10.22597863	5.51626285	8.331599263	15.95480471	8.441124416	17.47363892
AGPAT5	818.4683952	615.0540518	601.5279753	513.5736949	379.8094698	617.7932958	949.2000167	761.7759156	916.8499066
AGPAT5P1	0	0	0	0	0	0	0	0	0
AGPS	898.4277977	738.6997658	698.0962436	488.8059407	586.7037283	645.6348688	766.5728661	607.5454044	661.0611004
AGR2	0	0	0	0	0	0	0	0	0
AGR3	0	0	0	0	0	0	0	0	0
AGRN	6381.83605	4204.896107	4839.877771	7751.854248	6402.136063	7922.521147	5420.422508	5198.95776	5861.460874
AGRP	2.692711248	0	0	0	0	0	5.548949759	0	0
AGT	1.61208509	4.047764431	0	1.607025754	0	0	0	0	0
AGTPBP1	60.26441746	39.17697596	53.60468822	29.06602844	22.64050777	29.60441238	66.68078009	54.01078384	63.06333979
AGTR1	406.0605861	310.7681106	379.4160533	367.3779011	329.3231114	443.2399261	402.3756611	388.0197621	461.1124325
AGTR2	0	0	0	0	0	0	0	0	0
AGTRAP	1361.855694	988.1599764	1038.358159	1482.187368	1277.750639	1547.767014	1089.42515	984.1345416	1133.615429
AGXT	0.63032524	0.646318707	1.311502213	0	0	4.379060634	0	1.280267028	0
AGXT2	0	0	0	0	0	0	0	0	0
AHCTF1	562.7423448	437.9911349	455.714146	503.2980516	512.5984227	609.1299478	438.1587346	427.2423064	484.5065051
AHCY	3897.782656	2664.810553	3027.294147	2463.641548	2371.72138	2869.536539	3012.603029	2911.742901	3341.808417
AHCYL1	1811.943242	1276.438562	1388.667976	1494.255695	1301.719348	1609.449492	1425.166011	1303.29501	1544.973173
AHCYL2	241.2817548	171.3261647	152.5815516	116.4180154	78.88190685	120.6054055	189.6677399	182.95064	173.1555776
AHCYP2	0	0	0	0	0	0	0	0	0
AHCYP3	0	0	0	0	0	0	0	0	0
AHCYP4	0	0	0	0	0	0	0	0	0
AHCYP5	0	0	0	0	0	0	0	0	0
AHCYP7	0	0	0	0	0	0	0	0	0
AHCYP8	0	112.8640297	125.0194418	146.7081912	66.31149934	185.9136582	221.3224377	274.9274602	0
AHDC1	599.6734731	378.9646011	372.8974869	333.1963012	237.7707611	338.9924168	483.1140836	346.3766784	486.9977765
AHI1	497.453694	311.2243924	398.5173183	410.6591973	338.6124591	343.9492424	448.1606155	362.5784545	377.0056711
AHNAK	7176.0397	5097.561812	5856.152241	3736.555505	3066.3955	3856.332964	6262.947576	5755.894511	6560.486521
AHNAK2	915.367192	602.7344	676.0827349	161.9392353	121.6528478	151.3599402	727.8396978	710.2307924	769.7744837
AHR	441.748352	287.3162047	336.0270224	641.3461552	582.1652915	669.9669014	338.9344935	327.723646	402.4793362
AHRR	678.7730928	418.6640175	468.148371	451.8018006	347.3804116	447.0670767	380.4110599	368.838329	450.7428411
AHSA1	7322.69139	4886.216239	5097.537224	6146.142721	4957.889184	6608.301828	5552.11757	5289.533214	6113.732718
AHSA2P	1376.048742	745.7418031	1048.729263	690.5283322	507.8933275	596.4837563	1060.661008	909.5839855	1183.899823
AHSG	0	0	0	0	0	0	0	0	0
AHSP	0	0	0	0	0	0	0	0	0
AICDA	0.475452699	0.510844947	2.07412595	0	0.675833002	1.966665247	0.670818851	1.42910444	3.11643345
AIDA	2386.30583	1741.091165	1968.496704	2490.928972	2295.191339	2888.271203	1978.4245	1827.548941	2105.852017
AIF1	0	0	0	0	0	0	0	0	0
AIF1L	0.497092835	7.106692806	2.964826074	0	0	0	0.998446362	2.501241103	0
AIFM1	1066.036024	709.8690642	796.890527	720.3847058	634.755357	794.6204638	830.5895907	745.0734073	857.7784527
AIFM1P1	0	0	0	0	0	0	0	0	0
AIFM2	546.9517686	399.0756154	404.7660467	336.3283917	297.2118103	358.076798	449.8243966	406.1825339	485.3021902
AIFM3	10.93454167	4.543857361	22.03105988	9.041989616	6.468194065	2.165872202	10.69219896	14.70237181	27.6855763
AIG1	1852.105924	1318.150201	1563.706916	906.8594297	930.4990426	1222.086483	1674.392391	1551.124357	1840.207124
AIG1P1	0	0	0	0	0	0	0	0	0
AIM2	0	0	1.335504677	9.268088815	21.00517953	22.47580007	8.297146394	8.307947976	0
AIMP1	2088.599656	1347.788699	1753.774291	1336.929603	1088.903163	1413.121898	1502.7628	1473.24062	1536.073541
AIMP1P1	0	0	0	0	0	0	0	0	0
AIMP1P2	0	0	0	0	0	0	0	0	0
AIMP2	1565.497809	1177.757899	1254.794874	1167.10133	998.6168216	1368.157849	1065.827997	1018.807352	1258.368332
AIP	2055.200642	1561.127405	1652.293155	1449.625383	1393.218091	1709.635494	1730.375564	1631.546173	1937.338098
AIPL1	6.215881478	1.927682747	3.533983312	5.960745694	6.557531315	5.812432553	3.4641836	4.298808893	4.58738703
AIRE	4.488782516	0	0.797868461	1.946765495	2.306618284	8.934543205	0.771869494	0.77993038	0.765916797
AIRN	0	0	0	0	0	0	0	0	0
AJAP1	5.201466333	29.47014894	0.143398119	0.986049441	3.509570589	6.140012943	3.861708703	7.190131539	2.810716906
AJM1	104.1215599	61.72757013	92.74601827	47.2283716	38.78395098	53.1534459	110.3323726	127.5647158	149.1952349
AJUBA	2373.863712	1766.287825	2004.053816	1380.236464	977.8208452	1172.953903	2232.102795	1763.687709	2219.605707
AK1	3043.485879	2163.562964	2250.373978	1934.275518	1639.104686	2107.83651	2854.200485	2248.516085	3086.392817
AK2	4227.584303	3012.974103	3645.965075	3186.357799	2670.980791	3508.231328	4528.738663	3938.050346	4426.378224
AK2P2	7.457803186	0	0	0	0	0	0	0	0
AK3	1525.10648	1034.772828	1298.466883	1240.925031	967.2999019	1414.124523	1399.949535	1241.897553	1350.226925
AK3P2	0	0	0	0	0	0	0	0	0
AK3P3	43.51096025	16.814572	20.49234066	10.09394183	16.41561177	26.82142953	13.64305545	6.735846992	16.60157167
AK3P4	0	0	0	0	0	0	0	0	0
AK3P5	0	0	0	0	0	0	0	0	0
AK4	29.70299269	21.22699255	26.31737338	50.80294856	46.41271156	63.60343215	498.1479564	533.5144062	574.3217216
AK4P1	36.16961161	53.9594845	5.890826029	33.72069156	33.97500382	40.00618114	121.9881834	98.87558316	135.0896901
AK4P2	0	0	0	0	0	0	0	0	0
AK4P3	0	0	0	0	0	0	0	0	0
AK4P4	6.969804611	0	0	0	0	3.493289567	0	0	0
AK4P5	0	0	0	0	0	0	0	0	0
AK4P6	0	0	0	0	0	0	0	0	0
AK5	2380.131878	1966.678855	2107.919853	931.8548504	631.8629925	872.4707279	2063.451532	1995.53102	2076.278919
AK6	2355.239149	1310.972067	1653.62994	1636.553616	1692.873853	1846.941698	1554.300405	1418.498332	1563.625643
AK6P1	0	0	0	0	0	0	0	0	0
AK6P2	0	0	0	0	0	0	0	0	0
AK7	14.11663214	5.544353309	7.080845416	27.91068723	5.824002759	3.58597868	0	3.092146108	5.29564782
AK8	1.751920588	1.676318689	0.896510998	2.644744001	0.87102115	0	2.641788785	0.885508138	0
AK9	120.1266165	73.22579015	72.77841132	58.82235316	55.63068937	79.74705343	70.67276288	87.32171834	88.8867023
AKAIN1	0	0	0	0	0	0	0	0	0
AKAP1	401.1418822	290.6899716	304.7434159	173.8654542	150.5582068	194.6487973	353.4455182	268.8374363	302.2598702
AKAP10	581.4570707	381.3918339	482.3667475	454.858816	346.6623518	426.0936232	472.7532698	424.2393557	499.3993257
AKAP11	561.5677446	403.2397425	472.5236739	432.2959144	367.2319753	434.5924346	477.1499122	422.6426346	498.515652
AKAP12	1157.716547	887.4766032	965.0569116	711.7003126	670.2753751	779.9409136	861.1022131	776.9844649	879.7619144
AKAP13	636.62291	452.7055737	513.4791111	398.8724662	310.9798775	371.6171254	501.5904319	430.3413405	549.1005769
AKAP14	0	0	0	0	0	0	0	7.409222257	0
AKAP17A	934.628894	666.8159797	756.2358084	1110.42453	1011.437387	1166.65124	722.0118178	695.208127	743.9286069
AKAP17BP	0	0	0	0	0	0	0.626056971	0	0
AKAP2	2980.340412	2111.666808	2444.311917	3940.192134	3532.214731	4347.459364	2329.893234	2074.389181	2321.971664
AKAP3	9.906980364	22.67120854	28.89970169	11.29165096	28.67173751	6.602162941	16.76531719	22.68900225	15.77482859
AKAP4	0	0	0	0	0	0	0	0	0
AKAP5	38.87699973	27.13220123	28.49863286	12.18687532	15.21731599	16.10131831	23.69947322	29.28904324	32.89882386
AKAP6	9.122983145	20.47657227	64.11662891	8.761266905	15.58454592	25.63179252	11.77168895	17.91675728	26.00761455
AKAP7	117.4668607	69.73959012	69.70673633	120.3426607	89.96479123	157.1389697	96.95011924	70.00836227	94.19438642
AKAP8	740.6754075	422.2494232	517.4388772	646.3234978	447.3503615	617.8687483	576.390555	495.5924207	582.4006017
AKAP8L	1496.982287	1102.746707	1115.64678	1308.439511	1038.218346	1193.683114	1253.669843	1101.486116	1277.013495
AKAP8P1	0	0	0	0	0	0	0	0	0
AKAP9	395.0830943	324.022293	356.1772093	332.447399	191.5897858	279.8513838	409.7028737	326.8358341	364.6180926
AKIP1	2045.537556	1549.768953	1647.463703	1361.144545	1326.37284	1634.920324	1662.788883	1690.185995	1840.506312
AKIRIN1	1790.804401	1354.978622	1477.79446	1875.571173	1602.75919	2086.752737	1504.756595	1255.367269	1375.250384
AKIRIN1P1	0	0	4.66520615	0	0	0	0	0	0
AKIRIN1P2	0	0	0	0	0	0	0	0	0
AKIRIN2	1578.227822	1057.695229	1222.495219	1388.22776	1141.313668	1438.572339	1263.641383	1204.871477	1336.871231
AKIRIN2P1	0	0	0	0	0	0	0	0	0
AKNA	163.4888271	120.7831356	155.255668	100.745564	98.59025386	95.03298356	168.0284303	158.6382256	169.3407434
AKNAD1	15.93704481	7.805577651	13.60410791	0	4.67068226	6.124100045	12.42460813	17.70204139	27.71324904
AKR1A1	3391.220775	2236.351218	2492.427749	2458.341321	2178.95306	2794.350995	2512.65594	2414.772268	2732.063689
AKR1B1	8244.912683	5569.659395	6391.577004	18037.87	15428.25778	19472.95121	6288.478706	5845.884692	6747.101955
AKR1B10	0	0	1.110754334	2.23517044	0	4.724497267	6.178739003	0	14.95880533
AKR1B10P1	0	0	0	0	0	0	0	0	0
AKR1B10P2	0	0	0	0	0	0	0	0	0
AKR1B15	8.057724185	7.874205665	6.36575225	6.988289477	3.645609437	5.181802984	9.605853774	8.769748859	3.67802875
AKR1B1P1	0	0	0	0	2.011507796	0	0	4.106874719	0
AKR1B1P2	0	0	0	0	0	0	0	0	0
AKR1B1P3	7.928723762	0	4.080940642	0	0	0	0	0	0
AKR1B1P4	0	0	0	0	0	0	0	0	0
AKR1B1P6	0	0	0	0	0	0	0	0	0
AKR1B1P7	0	0	0	0	0	0	0	0	0
AKR1B1P8	0	0	0	0	0	0	0	0	0
AKR1C1	24.64925555	16.2956317	21.07622669	23.67988303	28.50700989	37.97541367	16.70466142	6.607022114	31.65142836
AKR1C2	0	0	0	0	6.074796702	4.093388903	0	0	0
AKR1C3	2.002748074	4.704025182	9.529001854	6.010333359	3.072015683	7.796982208	10.57705709	7.873885398	4.672957571
AKR1C4	0	1.562747486	0	0	0	0	0	0	0
AKR1C5P	0	0	0	0	0	0	0	0	0
AKR1C6P	0	0	0	0	0	0	0	0	0
AKR1C7P	2.217108479	8.935771097	0	9.437406284	0	3.902997412	3.979668825	0	3.817923824
AKR1C8P	0	0	0	0	0	0	0	0	0
AKR1D1	1.555538604	0	1.726849195	0.697438951	1.481412856	0	2.158396025	0	0
AKR1D1P1	0	0	0	0	0	0	0	0	0
AKR1E2	14.10507673	10.37240709	13.12922912	7.816660419	8.627416109	16.2457173	33.25883862	16.00974884	14.11301374
AKR7A2	2443.67263	1666.85279	1838.439022	1596.593306	1379.32264	1828.159014	2056.281608	1899.766944	2383.298284
AKR7A2P1	0	0	0	0	0	0	0	2.16002738	0
AKR7A3	36.53260163	24.3335053	22.16807789	12.44617	4.569101741	16.66300138	18.52540104	13.89875217	10.55061941
AKR7L	28.76997567	11.11773824	17.76163348	12.86743391	8.81649398	10.49217655	10.18938315	19.45299859	10.29804526
AKT1	4930.581712	3440.87561	4004.27433	4249.007491	3804.914335	4784.312134	4338.689064	3963.623806	4853.506309
AKT1S1	2518.54438	1939.490222	1915.248542	2178.654812	1895.884474	2350.067549	2173.237292	2063.559095	2198.844225
AKT2	3631.398043	2666.220563	2850.658166	2938.776966	2705.652867	3279.492005	2709.238032	2475.025078	2856.125499
AKT3	870.8114423	698.5091953	658.2210833	920.1803981	958.1471837	951.4194044	808.4867684	793.0360307	879.327748
AKT3-IT1	0	0	0	0	0	0	0	0	0
AKTIP	637.0280698	409.474735	459.1168273	288.1779979	250.6100208	270.9245013	607.074938	461.5512381	634.074677
ALAD	692.7588337	479.2754161	549.8551296	305.3732531	278.2154128	312.3122318	657.2626029	579.7662836	660.0228355
ALAS1	1310.678303	940.134947	928.0460611	1192.159699	924.4791248	1264.586877	902.784943	855.7020963	953.0357139
ALAS2	0	0	0	0	0	0	0	0	0
ALB	0	0	1.200170627	0	2.384575427	0	0	4.905281789	0
ALCAM	5743.61198	4120.547253	4863.216704	6825.66588	6066.717825	7543.615548	5090.587396	4642.325199	5041.504816
ALDH16A1	713.4333275	491.6629443	535.1831493	452.1495566	418.0782722	491.4040446	522.314116	558.9726546	589.4919682
ALDH18A1	1732.012383	1253.270982	1348.698229	1491.733944	1178.870249	1618.105714	1546.384103	1609.814165	1752.072609
ALDH1A1	91.19678597	74.82014603	68.95521254	29.89378275	6.863953766	7.755805823	79.87426174	37.92484774	79.68745265
ALDH1A2	14.26916358	9.242750473	11.3430853	61.35815846	8.642203434	10.59413176	8.335154638	12.25428028	12.74872109
ALDH1A3	199.6183999	182.8769938	172.0985669	4144.918639	3582.941026	4438.493788	207.678519	206.2526076	244.2274066
ALDH1B1	800.6301399	591.4581688	621.7149723	448.6633382	383.9924884	456.2519734	664.3615883	531.4911156	631.6601101
ALDH1L1	8.714311726	0.598562543	11.85980237	1.538014112	0	0.783280735	1.785701959	2.827468696	10.19374861
ALDH1L1-AS1	0	0	0	0	0	0	0	0	0
ALDH1L1-AS2	0	0	0	0	0	0	0	0	0
ALDH1L2	340.9199046	259.7787202	293.6615115	251.3187668	189.9925276	278.2538978	348.1233992	312.4624358	344.801809
ALDH2	417.650995	275.6400586	342.9570697	238.7184639	268.901942	258.1212649	299.9723363	364.9275073	362.9797593
ALDH3A1	0	0	0	0	0	0	0	0	1.157606884
ALDH3A2	547.3275746	413.045174	445.720725	320.2533296	255.3424646	290.1583793	492.9688063	402.7331874	486.4189597
ALDH3B1	1161.424934	819.7750031	922.0452554	503.5582455	429.2263026	574.0689885	1003.258023	946.0106855	1111.03163
ALDH3B2	0	0	0	0	0	0	2.843356888	0	1.379902225
ALDH4A1	469.3984732	322.2151602	428.538898	329.0062719	264.3145094	291.4040916	412.4447737	333.6498463	482.6504169
ALDH5A1	15.42524508	12.02946441	21.76091357	14.4758214	6.906089693	8.555534581	11.90846278	9.413617271	19.65382049
ALDH6A1	179.3881742	124.6916899	162.7004164	111.4157248	94.91831799	124.4414279	131.6000037	155.9908697	162.32275
ALDH7A1	2027.509102	1473.205965	1633.052476	1111.087129	1032.793737	1446.143387	1849.17989	1617.114016	1910.781273
ALDH7A1P1	0	0	0	0	0	0	0	0	0
ALDH7A1P2	0	0	0	0	0	0	0	0	0
ALDH7A1P3	0	0	0	0	0	0	0	0	0
ALDH7A1P4	0	0	0	0	0	0	0	0	0
ALDH8A1	2.143874177	15.23376565	0	3.967475705	0	1.48668717	3.328095297	2.152348151	2.835031299
ALDH9A1	1181.126642	883.6042096	1004.569711	1174.253002	1033.529901	1304.051372	989.5199087	923.8600205	1027.139588
ALDOA	33501.53812	23593.84882	25646.86804	26805.1383	24476.01568	30846.19464	44676.3303	43585.64497	49746.00146
ALDOAP1	0	0	0	0	0	0	0	0	0
ALDOAP2	3.492075665	1.76476637	0	0	0	0	0	0	0
ALDOB	0	0	0	1.292336777	0	0	0	0	0
ALDOC	180.1372651	172.7172133	138.4884528	125.2189267	102.0307034	105.3032808	619.4450855	651.9529638	715.3275736
ALG1	1245.228357	893.4253164	952.225294	840.5456393	760.6577322	972.4801958	1012.270115	886.6933453	1064.659114
ALG10	314.6968619	179.8888193	259.0581888	168.5844706	159.7934706	222.1576641	198.592162	190.6976785	270.3729012
ALG10B	169.6655402	136.315549	155.009121	112.6677234	97.93277441	103.4752972	140.5542078	137.7000642	147.7461508
ALG11	469.2199195	322.0225036	366.7012224	546.4566376	439.6225871	472.4763984	406.2926684	330.1176804	301.5761656
ALG12	445.723594	225.4895362	331.7375544	339.2972541	213.7849929	254.212353	280.8835653	328.5862794	324.549747
ALG13	835.7828752	725.1600342	809.5009756	978.367875	716.0503009	1035.536393	929.2211368	830.2394032	1138.838564
ALG13-AS1	0	0	0	0	0	0	0	0	0
ALG14	231.7799042	219.2886859	128.0678258	137.188901	161.4002918	172.4356868	290.0622389	195.6475929	195.6389754
ALG1L	12.25645084	3.10876743	0	0	0	5.081227834	15.68095239	3.103688221	6.001221937
ALG1L10P	13.28044047	0	0	0	0	0	0	0	0
ALG1L11P	0	0	0	0	0	0	0	0	0
ALG1L12P	0	0	0	0	0	0	0	0	0
ALG1L13P	14.29686656	0	0	0	9.572532888	4.836816981	9.906314403	0	17.1372137
ALG1L14P	0	0	0	0	0	0	0	0	0
ALG1L15P	0	0	0	0	0	0	0	0	0
ALG1L2	4.237324735	15.30159915	12.89515766	0	4.167118189	8.450762932	17.19087242	12.80381053	12.5216972
ALG1L3P	0	0	0	0	0	0	0	0	0
ALG1L5P	0	0	0	0	0	0	0	2.713350705	0
ALG1L6P	0	0	0	0	0	0	0	0	0
ALG1L7P	0	0	0	0	0	0	0	0	0
ALG1L8P	0	0	0	0	0	0	0	0	0
ALG1L9P	0	0	0	0	0	0	0	4.464587149	0
ALG2	866.9195794	628.2379958	668.33205	1261.556429	1066.735123	1322.279752	738.2148313	675.655438	726.0812786
ALG3	1717.073396	1128.495418	1200.087875	1295.163197	1219.385952	1455.497185	1303.814244	1081.882232	1413.696436
ALG3P1	0	0	3.416437649	0	0	0	0	0	0
ALG5	1246.843713	893.3637745	912.8641707	1040.023996	950.0624692	1087.300432	1047.936625	869.2480694	985.9686048
ALG6	505.0915215	289.175195	437.9128089	293.5115495	218.3979342	286.6118026	351.7687122	314.4658302	361.5393532
ALG8	1511.150903	994.8559748	1106.426063	1087.498559	930.5391569	1191.827586	1238.224176	1192.663761	1199.015664
ALG9	788.7819403	573.1714443	636.7513537	601.8327508	500.1181702	683.0109154	822.9054256	681.005673	846.3455029
ALG9-IT1	0	0	0	0	0	0	0	0	0
ALK	0	0	0	0	0	0	0	0	0
ALKAL1	0	0	0	0	0	0	0	0	0
ALKAL2	0	0	0	6.76188196	6.712196287	6.186343417	3.218691473	0	0
ALKBH1	337.1982514	282.5334162	274.4297271	303.2553202	266.8927738	347.3905686	257.8641781	275.4598169	274.4080157
ALKBH2	650.7468655	477.9054326	465.6001015	373.5669813	345.8264477	370.9925512	510.8012995	432.7799843	490.4707047
ALKBH3	1114.210509	712.2260585	800.5197612	773.5712281	680.4647961	790.8424882	790.6960411	761.9348989	839.2458615
ALKBH3-AS1	0	0	0.95208192	0	0	0	0	0	0
ALKBH4	433.9266584	262.5156381	265.6883714	250.6326585	203.8672407	240.2956081	269.6516848	290.6202198	308.6230676
ALKBH5	1428.249072	1063.189185	1237.668144	1210.090162	1089.39219	1288.263721	1843.480583	1796.47713	2033.267618
ALKBH6	795.6975695	505.6158613	526.7545845	524.8180706	388.6148336	555.2379744	560.3594545	586.8323607	662.0803705
ALKBH7	786.1561904	681.8345849	770.9595174	722.6773517	517.1609599	706.4379125	755.3218164	669.8224822	753.9054872
ALKBH8	194.6897614	112.5504795	135.7947692	146.2633667	92.41378578	118.2738983	143.5893324	138.8432453	146.0473136
ALLC	3.716730892	7.457692028	0	2.473833561	8.9031736	2.464640389	5.914509345	0	2.926539388
ALMS1	157.9315441	122.6654886	106.1400809	106.3205793	108.4926054	136.1330427	158.923285	160.5091183	188.1929681
ALMS1-IT1	10.97770188	17.22973284	13.51331598	9.372685388	4.763790164	9.370979086	7.888779928	8.83548771	8.04368464
ALMS1P1	2.873996161	0.87350406	0.480547351	0.482362088	0.430377034	1.294380498	0.435609516	1.759055295	1.758830613
ALOX12	0	0	0	0	0	0	0	1.416794404	0
ALOX12-AS1	283.046257	217.7967353	209.6614977	323.0330137	153.7758924	199.7139996	240.723247	165.6614619	308.603831
ALOX12B	0	0	0	0	0	0	4.965674279	0	1.459320284
ALOX12P1	2.978024887	0	0	0	1.475052716	0	0	1.503104279	0
ALOX12P2	1.858230383	1.42766024	1.990900015	5.927935617	1.269029615	1.185496843	0.835216568	0.460171956	1.151776803
ALOX15	0	0	0	0	0	0	0	0.695435595	0
ALOX15B	0	0	0	0	0	0	0.56321769	0.969607326	0
ALOX15P1	9.792806886	4.081670449	13.01165974	0	3.745940643	6.473395205	12.58199832	9.088809172	3.783480674
ALOX15P2	0	0	0	0.899823428	0	0	0	0	0
ALOX5	0	0	0	9.436609798	0	0	0	0	0
ALOX5AP	2.197209158	0	0	2.200998629	2.158222593	2.192684732	8.890273043	0	0
ALOXE3	13.01340539	12.10206495	14.00543764	7.640637054	4.266518088	11.58802604	10.7016439	10.23652806	10.01054436
ALPG	0	0	0	0	0	0	0	0	0
ALPI	0	0	0	0	0	0	0	0	0
ALPK1	284.6228355	227.1704931	218.1303354	211.6719895	213.8427566	234.8267251	254.5893248	217.2906609	218.8936634
ALPK2	620.7606002	388.7410224	514.5204196	542.2239835	479.673478	575.9810148	465.3829203	393.2925066	442.2200958
ALPK3	1.904992286	1.025404739	0.59835391	1.910204226	2.181073667	1.167218134	2.056710642	1.331322263	2.180960707
ALPL	0	0	0	2.217262355	0	9.008418484	0	4.453417362	0
ALPP	2.4180526	0	0	0	0	0.606605317	0	0.61331439	0
ALS2	446.6628239	373.3570954	393.2598775	302.6411783	248.7227175	312.434747	351.5059806	338.7322158	375.2698653
ALS2CL	153.4632912	68.82021953	73.16736033	112.0170202	70.14252956	91.86868261	95.56976238	70.10374759	93.69732501
ALS2CR12	25.47032013	20.86469848	42.70987028	44.27803398	64.87358529	60.60648419	69.00078098	12.16722575	38.10366212
ALX1	128.1097258	92.86654365	75.00731995	56.59036866	63.21293007	78.99010643	82.45176404	90.70970091	90.06056356
ALX3	0	0	1.029046342	0	0	0	0	1.679424022	1.9725286
ALX4	1.41033059	0.848595269	1.737854278	0.282469841	0	0	0.28418589	1.140318905	1.682690295
ALYREF	5139.572152	3850.26267	4176.918146	4018.721422	3695.486926	4633.885816	4181.68569	3932.449489	4628.062241
AMACR	675.1202919	535.6345405	609.1461723	391.4307193	379.9740157	413.9240582	563.8905143	541.5085995	673.6368535
AMBN	0	0	0	0	0	0	0	0	0
AMBP	1.784215715	0	0	0	0	0	0	1.804292933	0
AMBRA1	377.1365483	268.5408814	307.171507	350.5275756	288.4347264	380.0042368	378.5058744	267.708357	289.6257089
AMD1	2435.180422	1639.463792	1840.603773	1436.847927	1157.489753	1442.510571	1503.592812	1413.081404	1560.329417
AMD1P1	0	0	0	0	0	0	0	0	0
AMD1P2	0	0	0	0	0	0	0	0	0
AMD1P3	5.110253609	11.86495903	9.083699228	0	0	10.38410967	9.932135635	4.855529696	2.626840992
AMD1P4	1.116643028	0	1.18888093	0	2.600161452	0	2.775871308	0	0
AMDHD1	220.3333227	132.5286827	70.59459031	116.4386469	81.73674647	105.4508342	85.60787013	124.9299259	167.3413212
AMDHD2	2659.928393	1781.933745	1866.744733	1322.487234	1095.084561	1644.515971	1749.790185	1591.983648	1919.920261
AMELX	0	0	0	0	0	0	0	0	0
AMELY	0	0	0	0	0	0	0	0	0
AMER1	43.2461162	28.43123763	29.77394163	37.41851827	32.61788627	38.96651967	31.26844564	27.24397159	29.70426195
AMER2	0.888896353	0.189135027	0.553503457	0.358315845	0	0.534645219	0	0.556069231	0
AMER3	0	0.277346504	0.515886947	0	0.522235625	0.261703808	0.264661281	0	0
AMFR	2414.206749	1703.63223	1885.522013	1770.937654	1674.516809	1967.992749	2047.10522	2048.479161	2279.882725
AMH	293.3291935	124.768671	193.7916237	193.2199824	177.5443937	156.080241	177.8498673	226.3571073	166.7443156
AMHR2	1.216409758	0	0	0	0	0	0	0	0
AMIGO1	84.74865571	56.25040613	59.14083752	30.26186197	20.23533003	29.27736711	76.06345921	85.8067927	82.03544383
AMIGO2	2044.348759	1532.861875	1664.606348	5803.489101	5261.802946	6525.237287	1727.64613	1584.994247	1804.625039
AMIGO3	0	0	0	0	4.621800042	0	0	0	0
AMMECR1	218.145718	150.1193568	188.3200343	130.6770385	111.1988676	136.6322007	157.8589019	152.6649027	153.072158
AMMECR1-IT1	0	0	0	4.589685286	0	13.7402385	0	0	0
AMMECR1L	325.8394611	242.9824218	261.2426502	310.6082974	262.0309694	328.6218542	273.1269636	228.3533344	262.6569638
AMMECR1LP1	0	0	0	0	0	0	0	0	0
AMN	8.123845156	5.042484116	3.907373419	3.341103843	1.312505714	3.204998546	7.031169725	1.996157296	10.62678659
AMN1	260.7934139	200.4842022	238.93976	202.9912448	194.072421	236.415959	310.080752	174.0420135	340.0699327
AMOT	773.1101897	541.7367863	665.4005238	191.5667348	161.2577111	189.1936305	754.3076793	590.580918	737.0909967
AMOTL1	406.357095	295.8666625	311.9125154	234.5515585	197.4590591	235.9136465	308.7423642	280.6669156	328.8072643
AMOTL2	2595.550279	1891.673181	2075.830575	1649.951766	1441.989006	1822.798676	2308.032629	2115.755882	2445.158102
AMPD1	0	1.034831428	0	0.832379065	0	0	0	0	0
AMPD2	1792.729503	1324.779268	1608.760607	1760.729557	1338.311527	1763.159302	1793.454016	1581.936564	1969.395455
AMPD3	237.8653446	136.3667194	193.1122021	2539.71712	2226.124264	2725.38824	236.5618394	258.2051022	248.9359088
AMPH	345.1909952	236.0604835	247.0372474	217.4958938	195.2254916	279.0882406	265.5072882	257.8869494	266.0034302
AMT	47.35846239	38.47892856	34.05541669	26.33467303	21.26712643	25.53020345	72.27553271	59.13697144	56.15316258
AMTN	5.477775754	2.768848325	0	11.02547054	10.84755921	14.85853503	4.377016201	2.170336162	4.287339366
AMY1A	0	0	0	0	1.313505164	2.87108116	0	0	5.660820442
AMY1B	0	0	0	0	0	0	0	0	0
AMY1C	0	0	0	0	0	0	0	0	1.307469515
AMY2A	0	0	0	0	0	4.762829045	0	0	0
AMY2B	29.16421032	27.16509801	26.75833564	16.60184759	25.02587821	17.95642428	44.882887	24.19797066	26.46176979
AMYP1	0	0	0	0	0	0	0	0	0
AMZ1	184.3392333	141.373322	140.7184999	200.1330169	171.8391212	203.1155013	165.1810619	167.6885222	175.0069909
AMZ2	2785.474798	2019.697839	2295.311571	1596.476017	1537.581863	1779.126868	2403.497075	2262.969789	2443.460178
AMZ2P1	152.8289441	86.4149091	126.6921905	100.7224916	61.22213816	66.85749312	123.4104077	146.9722905	102.6312119
AMZ2P2	0	0	0	0	0	0	0	0	0
ANAPC1	552.5236684	432.4070564	577.3236488	432.3376656	346.8121331	516.1241267	504.746081	431.3279818	458.1717612
ANAPC10	569.8358674	325.3793067	418.5143591	525.7219021	461.265507	544.365888	398.1556289	424.0626636	492.3101892
ANAPC10P1	0	0	0	0	0	0	0	0	0
ANAPC11	5690.126478	3497.181803	4187.277866	3762.855749	3268.182271	3958.915646	3861.432566	4124.177278	4939.71456
ANAPC13	2934.601478	2173.677393	2513.060974	2054.036538	1699.460551	2006.279126	2301.433768	2038.361917	2328.528597
ANAPC15	2814.987412	2137.30854	2274.701187	1855.207754	1694.457051	2094.020594	2580.915497	2211.338635	2683.518432
ANAPC16	1426.57927	934.2284928	1270.69736	988.8625519	767.0847443	1014.293463	1205.737385	1268.052494	1243.04156
ANAPC1P1	0	0	0	1.015930506	0	0	0	0	0
ANAPC2	1230.18312	838.7890214	966.7330046	920.300205	708.0270072	913.9196878	1053.114963	861.0402073	1057.43027
ANAPC4	942.3807749	543.2855977	864.5199117	549.8533926	508.6482761	667.2633423	853.1379498	571.5219802	755.6363765
ANAPC5	3785.166397	2545.060359	3119.183476	2581.126572	2204.925668	2604.720169	3082.078215	2773.806433	3327.041817
ANAPC7	2042.747389	1467.261095	1541.74236	1344.878763	1281.81788	1245.151483	1572.059116	1384.076213	1622.469052
ANG	124.4917111	89.39181025	139.5009441	94.91688077	108.2265926	133.6302958	153.8638215	183.790957	167.7892971
ANGEL1	261.3852311	147.1029667	195.1830313	128.2905357	90.67794462	135.7599204	195.4933856	159.5778839	162.4233659
ANGEL2	600.4014941	420.3166728	524.7689261	528.9572275	500.6908553	500.8680226	476.3726093	481.582948	497.4643031
ANGPT1	279.9860836	233.4257991	273.1597312	138.6063117	165.2414074	185.0558263	255.6850895	218.6624039	285.4823214
ANGPT2	1.963429658	0	0.715662395	1.804785475	1.28115931	1.36152448	0.741478132	0	0
ANGPT4	1.372873045	0	0	0.745947507	1.318002692	0	1.371724389	0.709909777	1.34779648
ANGPTL1	0	0	0	2.590300341	5.947321328	1.723859766	0	6.116063433	0
ANGPTL2	945.7814278	668.4848258	672.9051597	248.8817	245.5191832	317.3381447	723.384507	746.8542204	725.2938953
ANGPTL3	0	0	0	0	0	0	0	0	0
ANGPTL4	20.17481975	10.12658309	23.01146091	25.11571572	31.80006315	30.97095013	258.8365493	317.4321068	335.5465691
ANGPTL5	0	0	0.998141984	4.64898494	0	0	0	0	0
ANGPTL6	14.67531382	5.631061669	2.40214381	7.016038015	0	5.331975681	6.749751303	10.31853291	14.36182655
ANGPTL7	0	0	0	0.780042239	0	0	0	0	0
ANGPTL8	0	0	0	0	16.61775064	0	6.818582532	2.283383715	9.73225875
ANHX	0	0	0	0	0	0	0	0	0
ANK1	3.670989467	2.51230925	1.973253935	1.913081853	0.383789009	1.730675556	7.229691076	6.518571363	3.637701785
ANK2	94.09380292	34.70548293	68.49264332	57.27082448	27.70074859	26.84793225	41.17092621	44.87657414	49.67433075
ANK3	1.784635912	2.356457522	11.95246801	0.767401238	0.814756627	3.735531759	2.777775529	0.836384345	10.02274186
ANK3-DT	0	0	0	0	0	0	0	0	0
ANKAR	67.14417989	112.8028099	89.16412491	45.90147762	28.16865045	15.35715796	58.32323182	46.91743385	70.13861308
ANKDD1A	111.4913918	66.74862409	96.06215314	118.3472582	123.3941178	115.2119187	95.54648011	84.87839724	99.04176281
ANKDD1B	13.15525183	2.908788489	0.725789916	5.553201887	1.086788894	1.407094514	13.40807462	7.791717652	11.28469913
ANKEF1	16.75675876	14.19816119	8.479771623	3.832381433	3.441925959	1.782723408	16.27895385	18.03222495	19.09778661
ANKFN1	6.441046944	2.078380932	1.404191569	0	1.92646364	0.689267895	2.783335853	0	2.778315628
ANKFY1	1031.720081	685.8393388	871.5906059	1078.426431	1024.257952	1246.85436	855.2706262	781.644151	856.4820254
ANKH	323.1484306	224.2179639	370.5306827	145.8831089	149.0146236	163.3464083	307.7050971	240.9952761	299.2497484
ANKHD1	1339.652494	909.8812877	969.7742733	893.7363496	821.4887672	1234.24098	891.4409166	788.0483019	899.1128125
ANKHD1-EIF4EBP3	243.2577303	194.4047178	185.5028993	266.6511958	206.7279408	277.6932005	193.269129	149.3296974	228.5212225
ANKIB1	1023.35012	795.2925604	803.0487955	1140.538554	1202.745123	1408.651472	832.9311474	762.7466632	868.2974768
ANKK1	0.649534238	0	0	0	0.648234538	0	0	0	0.642786564
ANKLE1	203.7391801	113.1182497	159.9111024	170.9711532	111.701773	104.4385204	104.208983	95.55915703	131.892549
ANKLE2	2638.894991	1821.031099	1980.80679	3123.646463	2386.256639	2991.598158	2142.124459	1915.625132	2071.255297
ANKMY1	198.134655	76.38381686	192.7905407	58.42138679	54.05378355	120.6199946	115.7628545	115.0944863	136.3405514
ANKMY2	791.2865834	568.512663	665.1610921	593.2075031	481.3059669	566.7694181	638.0339351	618.6552934	712.170034
ANKRA2	494.823352	320.6390994	332.2849386	316.0100642	262.0769214	432.1017703	360.205603	354.1231352	449.5666156
ANKRD1	785.4987624	635.575374	642.8800224	1774.271743	1503.321448	1817.29732	586.6066988	527.1717357	595.4751357
ANKRD10	2140.437417	1305.187774	1767.37349	1570.113544	1494.210661	1746.074088	1814.865149	1441.471442	1486.13863
ANKRD10-IT1	336.2121696	193.5021392	276.8998463	312.3685825	162.820829	252.5728457	198.7403358	243.976213	318.751745
ANKRD11	2402.032776	1796.359392	1888.461366	2143.82793	1542.84799	1936.575308	1829.504772	1841.099941	1839.384545
ANKRD12	322.9461659	283.4609895	289.3850409	375.4833262	307.876947	405.6630671	313.9513471	292.2461917	344.172214
ANKRD13A	4134.535769	3053.373027	3484.229145	2924.200787	2309.366955	3005.160087	3561.202982	3284.086751	3834.859913
ANKRD13B	208.1405317	179.2087663	155.9904944	74.38591726	34.91880314	65.49219461	181.9828132	142.0677767	155.8481094
ANKRD13C	500.4450151	428.1510888	465.9613481	371.1260863	343.8920566	393.7039185	406.6847093	370.5671793	411.6104518
ANKRD13D	1194.325054	703.6465476	771.1049078	784.5671773	574.4570746	810.5944789	818.1526178	700.5898467	884.3602093
ANKRD16	221.1479342	157.0031804	138.408998	114.2429925	101.5350213	120.5473868	150.5055888	193.8318277	232.64806
ANKRD17	825.7108775	581.0165325	588.6174247	635.2096174	511.4644325	711.6058023	609.3272502	525.5233311	581.0118066
ANKRD18A	1.502653833	1.010480937	62.69128102	0.946507774	1.911812604	2.395975529	1.495549511	1.492586063	5.384818504
ANKRD18B	367.851099	212.3059144	274.044573	207.7397647	138.8248619	211.3700427	231.3653736	225.8431109	234.1730157
ANKRD18CP	0.662950522	0.670991294	0.642326804	0	0	0	0	0.653060215	1.341778332
ANKRD18DP	6.658768923	0.94966913	4.668479213	0.699237468	2.736268445	2.788221431	1.478970096	0.730853128	1.489814025
ANKRD18EP	0	0	0	0	0	0	0	0	0
ANKRD19P	0	0	1.633993814	0	0	0	0	0	1.024562827
ANKRD2	7.292575794	0	1.370298762	1.756353998	1.739566388	0	0	1.761777931	0
ANKRD20A1	1.392982464	7.939397984	4.119102662	2.488298771	0	1.521808204	0	3.556669626	1.916565197
ANKRD20A10P	0	0	0	0	0	0	0	0	0
ANKRD20A11P	3.548622151	0	0	3.598625692	1.773774855	0	1.801341958	0	1.762941223
ANKRD20A17P	13.04194876	9.734355526	3.597333688	6.862753035	1.960672107	1.714424685	5.136063943	1.828191623	0
ANKRD20A18P	5.257202439	10.69585633	0	5.361685587	0	10.68656739	5.457547168	0	25.83569434
ANKRD20A19P	9.871353677	4.238016059	3.058345556	1.203438683	0	0.600718953	3.633760796	1.223580359	1.216821161
ANKRD20A2	0	0	0	0	0	0	0	0	0
ANKRD20A21P	0.580742016	0.602127076	1.096049267	0	4.852514115	0	0	7.701731055	0
ANKRD20A3	14.25736806	12.30062667	0	1.361425499	0.546154293	9.114232217	8.259036591	0.884298078	1.142051046
ANKRD20A4	0	0	2.803022904	0	0.484370078	0	0	1.481253384	1.523128773
ANKRD20A5P	47.60319702	22.32817584	19.2763028	11.05095808	0.89484896	8.506500323	15.26151606	36.7101334	14.70064291
ANKRD20A6P	0	0	0	0	0	0	0	0	0
ANKRD20A7P	9.465173425	7.102269348	5.649662934	2.647082072	4.500321371	7.543136274	8.536671962	7.786784329	8.693752089
ANKRD20A8P	2.750578353	2.022443518	0	1.253000655	0	1.833588354	1.454799189	0	1.155860546
ANKRD20A9P	0	0	0	0.676678934	0	0	0.734064367	0	0
ANKRD22	0	0	0	0	0	0	0	0	0
ANKRD23	49.72215953	43.68009886	32.6841455	48.89413176	25.99216517	30.8495333	32.24797674	45.9997893	22.99805696
ANKRD24	5.950437146	9.777881491	7.954302664	3.191133271	2.074700328	5.219346159	3.120789142	9.054508617	8.40641239
ANKRD26	287.533869	235.0014305	241.6116232	186.7714791	175.5440162	210.860661	249.2073625	186.0024353	223.1561242
ANKRD26P1	0	0.724072787	0.475519167	1.411552719	0.352283602	10.54616775	0	3.455257268	0.980393919
ANKRD26P2	0	0	0	0	0	0	0	0	0
ANKRD26P3	0	0	0	0	0	0	0	0	0
ANKRD26P4	5.637420531	5.968983776	10.94742413	0	0	0	0	0	8.537925043
ANKRD27	418.1434356	333.0085044	379.5003465	380.5741809	386.4369854	429.6200905	368.9224397	332.014287	451.5466937
ANKRD28	2859.660036	2098.70161	2265.119768	1595.635827	1421.98305	1778.646129	2633.958274	2473.235096	2709.270383
ANKRD29	2.633493511	7.880003401	4.426889197	3.165054784	3.115968793	2.209189083	10.21373179	2.254784406	7.002679374
ANKRD30A	1.857209905	1.200474888	0.786199279	0.388222603	0	1.940303348	0	0.401041895	0.745390614
ANKRD30B	53.68197428	54.19070679	38.06375699	44.72992406	29.91196478	39.83381488	65.40622174	50.79213989	54.52009514
ANKRD30BL	4.714608291	1.514798063	5.284431768	1.374914371	5.321983293	0.686986577	4.039359795	2.264930296	3.016354873
ANKRD30BP1	4.147972883	2.660087095	5.459184884	2.815448897	0	4.662676361	5.534096838	1.790260888	6.780545233
ANKRD30BP2	6.080968285	7.486294191	3.63834185	0	1.934095808	1.177723463	11.52876118	2.741950014	8.48862459
ANKRD30BP3	0	0	0	0	0	0	0	0	0
ANKRD31	0.592147358	2.046557805	1.430233768	0.564913989	0.567937772	0	0.862027994	1.170779845	1.784783876
ANKRD33	1.157582204	0	0	0	0	0	0	1.177202472	1.149036396
ANKRD33B	47.86714065	33.29212377	40.16420976	33.1329621	36.66284435	42.46896268	52.77440901	35.43177454	45.22952546
ANKRD33B-AS1	0	0	0	0	0	0	0	0	0
ANKRD34A	105.1246897	71.16134526	81.4760551	25.46131349	15.45893316	27.85957012	77.12126647	86.08789901	82.80238156
ANKRD34B	0	0	0.642635136	0	0	0	0	0	0
ANKRD34C	0	0	0	0	0	0	0.346568159	0	0
ANKRD34C-AS1	0	0	0	0	0	0	0	0	0
ANKRD35	75.0838888	67.80280278	79.63230063	33.22556	28.7900134	34.15409308	94.51467181	72.80537002	78.99439843
ANKRD36	245.7120699	157.8811723	139.7879063	234.8991089	215.7389187	287.0518999	175.8881392	156.7718938	200.6107716
ANKRD36B	130.8042679	153.6361346	150.9334931	243.7360677	146.6070608	240.2004968	136.7928135	152.9014462	172.3615582
ANKRD36BP1	0	0	0	0	0	0	0	0	0
ANKRD36BP2	169.47297	105.2788304	114.6077327	87.45370589	40.59554595	76.6112267	179.1272439	112.4875511	150.7154083
ANKRD36C	192.0412008	111.5421244	183.7956885	144.0912728	133.1977282	169.9879451	187.5648202	121.650011	156.7073075
ANKRD36P1	0	0	0	0	0	0	0	0	0
ANKRD37	230.3172291	144.3114427	169.9692969	268.9098755	203.0955059	250.8984145	777.1632273	690.6568576	851.8602758
ANKRD39	517.3208697	291.5251032	339.5103206	260.289047	315.6440179	317.2813371	310.7257243	300.4271764	373.8749445
ANKRD40	931.8395375	667.4138981	782.6201135	904.5227973	766.4716042	984.1913567	718.4865975	646.0552232	756.6969138
ANKRD40CL	4.13611733	0	0	2.092676558	4.032464942	3.401698868	0.616535868	0	10.35250413
ANKRD42	271.5653694	148.5335687	189.8652285	189.320208	158.6807869	204.1529378	169.7590115	163.8418337	205.0642817
ANKRD44	68.60556439	43.00296626	93.85255083	27.696227	47.53575325	26.16550831	127.7901152	101.5673855	184.3529329
ANKRD44-IT1	0	0	0	0	0	0	0	0	0
ANKRD45	7.074163492	3.993609284	1.270707511	5.359681526	1.239818401	7.5277585	3.439885744	1.637304617	1.278748978
ANKRD46	190.0824534	143.6048276	157.3309324	100.8890085	104.3326878	118.5788908	172.2323402	143.6292664	110.1918865
ANKRD49	302.6458273	265.7874937	274.9042502	275.8359877	196.2160834	344.0435932	293.1146284	240.1393213	262.0205178
ANKRD50	376.849914	242.8779767	293.1940327	236.4360439	198.8817997	240.4555538	264.3795072	239.5401786	273.784197
ANKRD52	1398.99401	1012.481092	1063.915399	1130.51907	970.6229614	1116.217661	1108.238799	1034.543907	1104.306619
ANKRD53	58.89442576	30.01728342	26.8834473	25.30908193	14.49591713	35.19575422	45.56812715	52.57872406	72.37725666
ANKRD54	631.236377	396.2007329	487.243256	418.7165249	335.8653784	440.0420531	583.2928216	475.0652842	534.4833552
ANKRD54P1	5.679920437	0	0	0	0	0	0	0	11.03489225
ANKRD55	10.05527983	0	0	0	0	0	0	1.203428201	0
ANKRD6	7.127168319	5.298937298	11.96088785	0	7.369494024	7.655202509	10.4355608	4.599485598	4.39040015
ANKRD60	0	0	0	0	0	0	0	0	0
ANKRD61	5.839084989	4.387533224	1.477147675	8.743924068	4.310289479	14.5169006	8.821543372	7.345019252	4.33129334
ANKRD62	1.583931903	0.529913056	0.677073453	0.629506419	1.493996847	0.997837301	0.738989951	0.741348074	1.145328787
ANKRD62P1	0	0	0	0	0	0	0	0	0
ANKRD62P1-PARP4P3	0	0	0	0	0	0	0	0	0
ANKRD63	0	2.340245335	0	0	0	0	0	0	0
ANKRD65	9.753188329	10.85314676	11.51027242	10.95910528	2.166649778	4.349065524	5.286700491	5.008974645	11.84570336
ANKRD66	0	0	0	0	0	0	0	0	0
ANKRD7	45.86367224	12.98995598	35.9784125	6.54824391	15.44412312	7.136639174	8.34409178	17.4035521	22.62890807
ANKRD9	887.9360534	574.1834069	669.7782459	570.3728456	482.4876127	615.2815645	745.0470227	669.1541566	754.3246083
ANKS1A	215.803571	147.9702865	186.5407924	157.6369529	126.5564929	137.3821066	182.0145502	152.2316546	192.3148353
ANKS1B	9.424984601	0.808676784	6.843311152	8.06205513	0	1.404897689	5.926061617	2.993526196	0
ANKS3	624.6764143	354.5553816	439.3138459	376.0317195	359.084727	422.9470095	489.4044353	448.3724951	403.9422566
ANKS4B	2.458811691	0.753319143	0.748867384	4.304183661	6.953836171	9.640399945	5.339383929	2.035507525	2.805773428
ANKS6	471.0200727	371.1034725	379.6202639	237.3464272	193.8271467	252.2227337	395.3774725	292.3549575	398.3838522
ANKUB1	0	0	1.723647286	0	0.840424334	0	9.178368933	0	0
ANKZF1	489.8932428	356.6370694	353.1993859	299.9103881	211.8932602	279.3754614	1202.405786	1008.160567	1142.677659
ANLN	6389.75634	4859.93609	5381.895409	5254.616414	4549.979867	5673.154108	5640.332191	4999.338586	5579.578104
ANO1	0.476082994	0	0.479361459	0	0	0	0	0	0
ANO1-AS1	0	0	0	0	0	0	0	0	0
ANO10	2611.77864	1846.933536	1949.120312	1884.803549	1636.707572	1977.325903	2138.182672	1833.545302	2061.737542
ANO2	0.442857432	0	0	0	0	3.453859377	0	0	0
ANO3	2.771348081	0.532210677	0	0.533131635	0.300493892	0	3.933485127	0.53987304	0
ANO4	58.61598534	48.73396372	41.66431631	39.84964992	23.60509112	95.94024408	47.02538913	36.99638246	50.29256112
ANO5	34.10959671	22.0827813	23.09696376	19.65958234	17.0397232	22.16762496	22.85455782	33.69105632	23.87224669
ANO6	1316.69333	936.6752233	1092.16592	1097.03586	931.4052035	1194.577982	1176.669304	1121.106405	1226.73383
ANO7	34.0997521	22.77086518	35.42047381	36.05295619	10.73175923	30.19938579	105.7281448	103.889654	112.4706958
ANO7L1	252.7521074	163.7625888	156.4866956	504.6548266	418.4239685	740.3662396	224.0970141	204.7978359	324.1990824
ANO8	319.9891508	237.3625691	265.2138246	101.7445627	99.03157942	121.5199887	289.8643523	250.0143904	302.4087656
ANO9	21.37436161	54.54434721	14.4129103	76.63141632	47.61046218	55.01266388	18.52217656	11.91823258	20.34835238
ANOS1	2.79226788	0.720680038	7.632404009	2.976236259	7.387574993	5.132402588	10.60325916	6.87014041	1.049038419
ANOS2P	3.952551349	2.826353275	0.687461871	1.319442988	1.95081389	3.366577834	1.674393914	0.569379894	1.68330823
ANP32A	3142.14494	2136.318201	2472.010096	1397.538808	1097.85447	1441.381571	3331.111837	2759.804639	3155.184681
ANP32AP1	0	0	0	0	0	0	0	0	0
ANP32B	6214.786055	4683.151465	5008.290584	4510.294663	3824.730873	4855.952819	5056.354383	4786.017039	5441.755852
ANP32BP1	0	0	0	0	0	0	0	0	0
ANP32BP2	0	0	0	0	0	0	0	0	0
ANP32BP3	0	0	0	0	0	0	0	0	0
ANP32C	0	0	0	0	0	0	0	0	0
ANP32D	0	0	0	0	0	0	0	0	0
ANP32E	2205.256227	1560.686068	1759.819307	1608.089679	1398.687698	1761.571505	1951.361107	1805.993161	1857.914691
ANPEP	3664.347116	2649.842453	3022.647512	4283.844213	3854.650311	4930.855141	3047.310498	2896.346257	3197.211021
ANTXR1	2464.468171	1752.844013	1948.206487	1408.18826	1334.087031	1533.990359	2049.368602	1815.675946	2163.915055
ANTXR2	2918.832002	2240.563552	2536.229589	4122.753415	3762.363932	4521.33107	2540.11762	2329.48003	2504.790614
ANTXRL	0	0	0	0	0	0	0	0	0
ANTXRLP1	0	0	0	0	0	0	0	0	0
ANXA1	16417.50892	11790.47066	13682.78905	11872.58721	11021.06241	13573.38213	14209.36463	12854.14885	14519.63915
ANXA10	6.794702594	1.353857211	2.695248996	0	2.396205397	0	0	2.465730489	2.711524932
ANXA11	5102.372698	3673.644676	4281.312404	2485.220379	2463.016848	3040.312581	4099.399796	4001.702076	4414.373443
ANXA13	2.669270269	0	0	1.756353998	0	0	1.765847285	0	0
ANXA2	86197.06841	62433.82235	69014.60828	63344.67959	56451.94129	70515.56008	75520.42742	71858.12152	81356.10102
ANXA2P1	0	0	0	2.13059956	0	0	0	0	0
ANXA2P2	4.163250039	10.69559865	0	6.262690898	2.000604699	4.111526791	8.552540468	6.366918234	10.33340188
ANXA2P3	0	0	0	1.911360415	0	0	0	1.922017834	0
ANXA2R	6.265314632	11.78853628	17.75933285	18.08081898	6.909178903	4.622767376	4.699159556	8.259359403	13.41001883
ANXA3	381.7509997	295.9213545	271.841588	161.608077	166.5888711	250.7265552	308.4620121	296.0186244	289.835538
ANXA4	1958.570622	1542.23151	1509.903045	1260.27162	1399.019425	1536.468321	1888.083144	1556.887153	2040.382842
ANXA5	39890.25681	28849.04412	32426.12392	36785.54853	31956.69876	40696.6102	34340.31266	31732.32646	36148.69365
ANXA6	7385.136479	5145.548426	5615.95949	6493.506321	5588.815396	7331.039589	6198.969062	5498.470829	6407.186345
ANXA7	4495.801634	3113.804524	3701.114057	4114.284202	3389.664145	4328.327272	3771.664126	3389.282898	3911.336953
ANXA8	7.39837535	0	3.712365259	18.11938431	15.09992598	24.13245952	0	0	2.15618958
ANXA8L1	1.249425223	2.708315668	0	30.91492896	27.14539481	24.98699624	3.90796857	3.874892205	2.265026712
ANXA9	6.79068071	2.278231034	4.590494923	0	2.243630185	0	3.432928992	2.284826479	5.578070907
AOAH	3.46386245	4.19189185	3.545557622	20.95261283	0	10.42528605	11.97419647	10.98045915	3.585660925
AOAH-IT1	0	0	0	0	0	0	0	0	0
AOC1	0	0	0	0	0	0	0	0	0
AOC2	20.67569436	6.581611197	7.317454684	13.76075699	8.701034727	16.26943174	11.99646316	18.2700716	11.15581941
AOC3	4.168082302	3.676108091	13.93905138	3.233526871	1.242339742	3.684723142	10.04321517	2.104783475	6.666684023
AOC4P	0	0	0	0	0	0	0	0	0
AOX1	1749.287485	1337.138838	1364.389887	1225.358692	1082.09368	1237.605192	1628.302482	1393.470911	1583.31611
AOX2P	0	0	0	0	0	0	0	0	0
AOX3P	16.28019554	1.673870756	9.988914676	3.006554107	11.76832574	5.463954162	9.112533677	6.873584428	8.951054782
AOX3P-AOX2P	0	0	0	0	0	0	0	0	0
AP1AR	457.2091337	342.9261328	386.0501967	368.7223948	348.4038035	343.7878039	300.0430972	314.8350847	325.1969665
AP1B1	1776.533617	1205.563024	1293.751988	1456.444278	1246.982372	1581.624845	1406.881253	1346.129863	1451.798137
AP1B1P1	0	0	2.512408093	2.444055268	0	2.435067746	2.474141198	0	0
AP1B1P2	0	0	0	0	0	0	0	0	0
AP1G1	1199.517636	906.9503819	1068.010144	1143.614787	960.5721006	1114.552383	1115.900215	903.8350124	1051.899807
AP1G2	1244.48812	688.313748	671.5304732	414.6025472	328.0367504	477.0512018	852.4347846	740.1932808	928.7925182
AP1M1	3209.695	2262.429627	2314.841418	2325.110209	2095.075945	2504.090069	2548.21104	2432.046972	2785.191308
AP1M2	854.0369753	537.7208879	572.3074422	350.8758455	302.999583	372.3631446	687.421218	715.280211	766.851652
AP1S1	3711.743036	2693.57982	2922.52982	2389.913837	2184.801049	2930.909236	3004.352397	2965.46441	3410.289702
AP1S2	2285.66395	1682.170043	1843.44382	1665.4799	1535.321037	1927.775334	1962.878747	1948.625314	1772.476871
AP1S2P1	0	0	0	0	0	0	0	0	0
AP1S3	52.20843409	37.08339208	29.22012984	33.84663909	33.6239241	47.0945465	34.21493512	34.06089262	33.77408825
AP2A1	2627.68366	1836.532183	2068.374229	2039.73525	1749.702362	2164.220077	2083.413985	1932.276143	2387.701258
AP2A2	1555.247828	1169.24124	1360.203497	1222.636124	979.6413898	1329.201665	1493.5938	1462.155235	1611.42919
AP2B1	2779.75769	2063.946846	2335.851993	2210.444257	1895.339092	2316.474858	2412.706343	2120.100045	2527.002846
AP2M1	23509.53468	15959.26128	17474.92412	15107.18643	13572.20792	16748.06252	19239.45831	17869.60569	21294.08341
AP2S1	9898.603171	6435.359831	7070.643373	6847.409326	6333.416319	7679.009951	7790.709314	7130.390398	8486.58116
AP3B1	927.2243058	661.9257398	790.2143792	819.7315122	708.4632447	931.3080921	799.2183679	755.0903559	866.7915159
AP3B2	4.461679821	1.87769338	1.784673313	20.43808299	11.12374828	1.311082	10.87835557	8.670733351	8.213052519
AP3D1	3058.413011	2109.165235	2450.424979	2833.675755	2234.203345	2686.295318	2226.472294	2088.35686	2557.979892
AP3M1	1168.169723	898.0863954	1138.812668	1010.84073	890.1170156	1071.003709	1150.771599	977.4138204	1113.704494
AP3M2	736.790838	440.564664	471.8420229	462.9926576	362.6450424	550.239719	495.7852248	482.7793718	510.6321989
AP3S1	3552.191213	2661.341124	2638.834051	2751.931517	2936.308494	3617.741388	2981.030822	2953.550832	3236.339756
AP3S2	1023.277697	903.6779036	958.5020095	938.5213339	825.2993768	1125.211096	880.4817967	722.704559	926.4115347
AP4B1	594.5105748	407.0255137	560.3516537	360.3315709	302.9711213	348.834474	487.0026545	423.4963322	462.8605433
AP4B1-AS1	3.144242743	5.233938238	2.689390687	5.08522793	5.398759267	7.821119118	8.645034812	3.280007964	7.22016557
AP4E1	271.4306363	194.0572402	245.0488614	188.399342	173.2785798	217.2671376	239.1582316	232.6086509	252.4532745
AP4M1	619.6357933	446.558986	428.2638184	340.2910628	326.4057834	373.9045553	423.2738988	428.6468373	486.3208424
AP4S1	245.1385313	136.0046401	170.1343257	149.1170469	203.2185973	214.4772826	194.6138642	171.6840249	215.7887289
AP5B1	316.6814815	208.2634109	247.4948121	221.8270809	209.6759337	264.8820781	258.4546388	242.2719827	280.8975405
AP5M1	687.1810511	559.1759248	627.9493277	529.5968827	453.7865277	607.600507	561.2444347	612.0668643	607.6121281
AP5S1	415.2783837	308.4536544	306.0238003	288.7103073	235.9516021	310.8229535	301.2206926	318.2594622	341.7963083
AP5Z1	1489.362077	1086.426016	1198.302751	1703.295916	1634.917511	1847.1284	1040.507575	1050.691952	1217.276015
APAF1	336.4208873	216.3768053	234.8626617	302.1344848	251.65004	292.6360034	392.0768488	303.6732562	352.1185067
APBA1	149.3495343	128.3058911	134.3400112	78.23520474	60.58180836	109.3285118	127.8136768	103.014315	152.0589061
APBA2	424.4795534	306.9865266	300.3049998	262.8696867	249.6446198	309.3485179	393.765537	363.8775008	393.865029
APBA3	528.0493048	315.0592511	290.166212	508.5522116	511.2778305	604.3949734	387.4355521	349.5308867	346.2696998
APBB1	824.5159578	576.0947272	558.9500711	439.7101953	402.5124432	540.3604284	708.2087316	620.0491432	865.506507
APBB1IP	620.2892294	425.6738451	506.8256139	361.9426048	302.96199	365.5197534	527.1167636	509.9707989	521.857845
APBB2	1163.802497	874.976921	1150.102436	1951.913157	1508.194155	1882.160378	1098.564952	960.7650434	1017.271518
APBB3	536.3178778	383.7631723	346.0307133	259.955859	212.7250756	295.4698231	418.9876505	393.7332013	593.4531454
APC	508.1405597	399.6303084	361.6641678	280.7551097	208.9725931	273.0175403	418.8622004	352.7256785	415.7497555
APC2	129.4271328	91.29063315	110.015032	73.1957876	64.6010533	81.50738612	96.67126517	80.93232091	108.5272775
APCDD1	9.534055689	5.266083462	4.201285011	15.08688018	14.73767059	21.3357606	6.657180789	5.452764246	5.832633193
APCDD1L	69.47603212	61.15737354	48.8288383	74.8591583	74.16250137	103.2910174	68.68275074	58.44826098	75.68022583
APCDD1L-DT	34.27338343	13.07659993	21.9654563	23.3267315	19.20412422	14.39058316	21.30515695	18.63097207	3.937104647
APCS	0	0	0	4.276563588	0	0	0	0	0
APEH	2975.158905	1925.306835	2262.588054	1916.637494	1676.418877	2092.564831	2085.364364	2100.916238	2485.307343
APELA	0	0	0	0	0	0	0	0	0
APEX1	5034.150083	3774.330862	3813.956209	3924.578983	3317.143127	4256.260093	3877.256106	3620.979256	3981.49088
APEX2	684.1601661	479.684092	570.9631145	581.8639521	504.8630162	574.2514658	520.233006	428.9985692	512.4538708
APH1A	3765.140657	2660.068585	2864.382736	3056.075304	2652.061692	3403.230984	2764.004103	2804.800334	3203.636549
APH1B	529.3296745	321.5978302	493.6439446	227.4273525	177.803365	302.1617179	382.7191784	424.0180077	439.1691634
API5	2841.760312	2031.699754	2206.928143	2327.368529	1876.62479	2386.267816	2267.1157	2145.934901	2272.197389
API5P1	0	0	0	0	0	0	0	0	0
API5P2	0	0	0	0	0	0	0	0	0
APIP	1221.946452	912.2597337	954.3850888	929.7699075	851.5407913	1118.414119	1005.213632	854.9164414	1006.028973
APLF	78.31328143	51.61911033	68.80602727	113.0350832	103.9370417	142.4630246	65.65445594	48.57547238	73.230356
APLN	20.5214221	14.09096749	13.71980358	0.539477829	0.53431989	1.602104971	154.1859395	162.558146	188.5378026
APLNR	0	0	0	0	0	0	0	0	0
APLP1	552.7248227	317.8192954	378.6004913	274.3378235	262.9076465	348.0175368	550.1079176	429.4990455	538.3697086
APLP2	12470.68104	9158.468981	9932.296944	9223.685065	8256.099697	10566.1697	10972.97942	10024.5591	11652.50539
APMAP	3719.712759	2734.503525	3005.214963	2626.293279	2290.672369	2915.166226	3298.520161	3061.549245	3355.495862
APOA1	10.63755256	0	0	2.172684843	4.291322634	2.154493776	0	0	8.437550932
APOA1-AS	4.257884365	0	4.375729795	8.609163807	0	0	8.745247598	4.308884972	8.354210329
APOA2	0	0	0	0	0	0	0	0	0
APOA4	0	1.204748034	0	0	0	0	0	0	0
APOA5	0	0	0	0	0	0	0	0	0
APOB	0	0	0	0	0	0	0	0	0
APOBEC1	0	0	0	0	0	0	0	0	0
APOBEC2	0	0	0	0	0	0	0	0	0
APOBEC3A	9.424714474	7.293251061	9.331574474	4.762599788	4.24355344	7.541615395	7.255664645	2.878267956	3.390232317
APOBEC3AP1	0	0	0	0	0	0	0	0	0
APOBEC3B	1628.554374	1253.456552	1263.648866	1533.066265	1423.372446	1685.799916	1349.479664	1250.314709	1423.361313
APOBEC3B-AS1	6.234400152	0	3.233881361	0	6.216128095	3.137178618	6.393484313	3.15976986	0
APOBEC3C	1561.29434	959.1126113	1227.055924	1042.960408	933.0114341	1133.742521	1262.26613	1211.268857	1289.568695
APOBEC3D	108.0089807	83.27629407	83.21447861	193.8212008	133.9195132	138.0610663	132.6559068	102.9656101	97.65234976
APOBEC3F	205.2367015	161.4391784	134.8772205	228.0059866	307.5680487	342.4868892	199.9469769	106.7768811	212.3293148
APOBEC3G	229.8564833	160.2326051	195.9675703	464.5527164	523.5139218	637.8707827	219.9238511	204.6836946	201.0064111
APOBEC3H	0	0	0	0	0	0	0	0	0
APOBEC4	0	0	0	0	0	0	0	0	0
APOBR	0.849397852	0	0.886312323	0.429716945	0.426629094	1.28452295	0.861901046	0.863401268	1.26862022
APOC1	103.0013452	97.35454949	149.7065925	65.10554715	18.70037843	22.03378763	63.85555139	68.42499841	187.6995606
APOC1P1	0	0	4.434526344	3.610238969	0	0	0	0	6.987231003
APOC2	9.051039447	0	2.331749232	4.58714167	2.267685142	4.557932877	2.310911404	6.894737212	2.230932829
APOC3	0	0	0	4.648368306	0	0	0	0	0
APOC4	0	0	0	0	0	0	0	0	0
APOC4-APOC2	0	0	0	0	0	0	0	0	0
APOD	9.331790949	0	0	2.337069238	3.166441045	18.56328308	7.095253098	14.09292031	0
APOE	99.77129222	76.09891183	67.34650196	49.70469739	60.33201387	70.25358727	55.48144909	109.337578	94.36636037
APOF	0	0	0	0	0	0	0	1.007258817	0
APOH	0	0	0	0	0	0	0	0	0
APOL1	195.1048558	129.4608001	151.2177278	522.1466058	565.3622563	699.9816413	170.0401252	120.4630815	189.1031324
APOL2	848.5245633	621.3040755	747.4398778	2225.503157	2518.657941	2772.1981	671.9100967	708.6407267	790.6843777
APOL3	69.45460208	51.54528582	50.35005374	216.7908754	313.3199547	241.8343713	56.73643206	47.75412071	63.80926774
APOL4	6.500864962	7.945088354	6.52347595	10.59295305	7.002900107	13.32999553	11.07837491	3.421422122	5.696257661
APOL5	0	1.24127377	0	0	1.223191178	0	0	0	0
APOL6	248.0831205	176.4668882	197.2415272	682.1256124	710.4839974	873.3131821	203.0163521	195.9071043	215.75485
APOLD1	424.8646338	245.8859065	347.8711947	321.7977156	316.7958847	356.9708656	306.8143281	274.7397845	391.670635
APOM	89.38261623	64.3428214	69.34404297	46.39594115	59.30112606	92.9221728	82.82732713	82.03298707	88.09021116
APONP	0	0	0	0	0	0	0	0	0
APOO	664.9556709	499.079043	599.5709206	888.630413	841.434143	961.3136221	627.2582297	537.0385671	631.5866833
APOOL	241.1739743	179.3816247	208.9306796	167.0906486	138.9765058	164.0178763	198.7054504	180.9090356	220.3773249
APOOP1	0	0	0	0	0	0	0	0	0
APOOP2	0	0	0	0	0	0	0	0	0
APOOP3	0	0	0	0	0	0	0	0	0
APOOP4	0	0	0	0	0	0	0	0	0
APOOP5	0	0	0	0	0	0	0	0	0
APOPT1	1567.322484	1101.488727	1158.781722	862.1188173	816.4513093	1189.460676	1188.331767	1036.705377	1168.180044
APP	10709.2023	7654.76044	8412.560502	8762.99456	7831.817494	9670.150052	9037.323842	8520.818334	9822.255934
APPBP2	601.7827711	502.3100353	585.4836327	613.8309103	481.0380687	556.2645113	456.6924127	422.659273	467.7426315
APPL1	597.7738533	385.0814486	493.6189934	405.8302579	301.3383371	429.0447195	661.7260707	510.672215	609.8419325
APPL2	2096.756067	1516.232487	1784.262543	1331.271702	1232.325861	1313.16121	2017.342378	1431.832149	1773.429243
APRT	5460.614436	3521.591087	4030.026815	3653.549145	3363.261455	3941.688596	4169.44899	3815.511383	4799.650037
APTR	463.4659244	374.2605115	415.8543786	394.6684342	322.2776438	411.5021432	350.3211237	307.5251805	340.3738491
APTX	1384.481432	1234.639721	1234.072257	1061.031464	1014.296815	1247.615391	1058.18867	1199.319209	1155.078294
AQP1	3.337263152	4.02167462	0.677618964	0	0	1.622327026	0	1.301722327	0.659605138
AQP10	0	0	0	0	0	0	0	0	0
AQP11	111.8966717	68.03041759	93.93530241	25.08966293	20.5952458	16.80832979	69.59350139	64.08853803	76.96370335
AQP12A	0	0	0	0	0	0	0	0	0
AQP12B	0	0	0	0	0	0	0	0	0
AQP2	0	0	0	0	0	0	0	0	0
AQP3	14.12335529	21.6126064	24.20579694	8.320835941	4.225835908	8.471632768	17.82017926	6.66347608	12.11762155
AQP4	0	0	0	0	0	0	0	0	0
AQP4-AS1	1.851897417	1.318984903	0.873623273	0.603684863	0	1.866709714	0.63067788	1.23437782	1.230361994
AQP5	0	0	0	0	0	4.905988801	0	1.261464553	0
AQP6	1.673193713	3.011773456	1.551265955	4.920175514	2.082650503	4.251785611	9.687786041	5.041809165	3.847530963
AQP7	1.758943878	0	0	0	0	0	0	3.561789112	3.153885675
AQP7P1	0	0	0	0	0	0	0	0	0
AQP7P2	0	0	0	0	0	0	0	0	0
AQP7P3	0	0	0	0	0	0	0	0	0
AQP7P4	0	0	0	0	0	0	0	0	0
AQP7P5	0	0	0	0	0	0	0	0	0
AQP8	0	0	1.457722756	1.416511485	1.403205851	0	2.859504679	0	1.384926303
AQP9	0	0	0	0	0	0	0	0	0
AQR	591.8537004	384.1767441	376.624747	462.055425	352.5502285	429.3761866	458.6784133	422.5358235	416.1040202
AR	71.25745652	60.69482159	64.54694186	17.31632106	16.15589091	19.73669739	55.24639209	49.42954223	67.51435129
ARAF	1640.960235	1267.585162	1254.903431	1347.661119	1106.655313	1349.391782	1418.320592	1242.742896	1567.472422
ARAFP1	0	0	0	0	0	0	0	0	0
ARAFP2	0	0	0	0	0	0	0	0	0
ARAFP3	0	0	0	0	0	0	0	0	0
ARAP1	2048.330965	1227.535842	1315.719507	1054.294196	1160.90876	1187.211043	1511.132154	1297.188581	1606.694036
ARAP1-AS1	0	0	8.488215177	0	0	0	0	0	0
ARAP1-AS2	0	0	0	0	0	0	0	0	0
ARAP2	267.7696415	171.5877499	203.4432468	88.66017636	73.02008397	91.05211152	285.0497462	159.5462827	180.7527909
ARAP3	444.7412038	292.8890098	349.6485866	264.4083175	220.2753339	290.4643294	369.0305232	311.5372517	355.8050791
ARC	11.82409833	7.652431533	14.2961236	3.627145023	2.378624153	5.335637056	9.461691576	12.62963166	11.18859683
ARCN1	4718.863775	3584.38879	3959.102713	4689.131165	4090.487567	5067.306695	3890.386114	3542.212664	4004.249957
AREG	40.51375638	33.81121439	45.11813329	11.10118808	15.77878005	15.8011419	30.45775543	34.00108772	24.26369498
AREL1	873.4808927	552.3469864	582.6168088	714.4988298	632.3576751	790.2994782	665.3619135	524.0171086	631.0220252
ARF1	13930.4827	9949.789899	10569.83032	14676.96264	13495.14045	16395.96835	11412.89933	10270.4467	12458.95162
ARF1P1	0	0	0	0	0	0	0	0	0
ARF1P2	0	0	0	0	0	0	0	0	0
ARF1P3	0	0	0	0	0	0	0	0	0
ARF3	4352.590425	3281.338454	3240.785603	4239.347146	3505.516045	4359.570741	3418.586681	3092.475314	3826.360972
ARF4	14114.45993	10062.32157	11456.5898	13994.90912	12161.98979	15500.65228	11617.99014	11100.13448	12648.77435
ARF4-AS1	44.20956747	45.00075866	26.99112633	0	13.09609578	6.60757051	13.51486332	0	23.96096064
ARF4P1	0	0	0	0	0	0	0	0	0
ARF4P2	4.763741305	0	0	0	0	0	9.787262528	0	0
ARF4P3	0	0	0	0	0	0	0	0	0
ARF4P4	0	0	0	0	0	0	0	0	0
ARF5	5479.679876	4386.294119	4102.170679	3755.233945	3500.304138	4255.210321	5023.473748	4524.006903	5202.080906
ARF6	2689.766569	2014.614299	2126.781497	2031.953943	1766.719711	2231.820323	2283.56385	2096.344887	2296.712933
ARFGAP1	3112.275669	2020.33529	2483.381501	2852.63258	2287.454365	3036.799633	2280.475001	2123.747795	2446.449989
ARFGAP2	1733.386457	1190.669006	1256.00133	1319.341963	1091.458827	1354.888548	1375.734906	1543.491995	1461.029895
ARFGAP3	1749.280371	1281.46011	1459.90494	2040.847042	1744.936323	2043.921833	1490.453918	1387.224441	1486.32127
ARFGEF1	673.8422633	419.4163488	539.0913765	498.1856917	470.3782699	573.4727477	497.0956079	448.4365817	545.3125827
ARFGEF2	639.3943181	411.4586343	472.3442958	502.3216113	467.0938937	538.37233	451.0176066	407.3403289	457.2580774
ARFGEF3	1.394933378	0.822290727	0.601152617	0.452044241	0.565348287	0.450771571	1.969649674	2.300789967	2.320210979
ARFIP1	578.0463631	479.9595274	589.89252	492.2804174	426.3622862	564.4571191	514.5908764	459.2468412	480.5940372
ARFIP2	2337.208533	1618.353871	1745.695209	1760.507929	1482.544779	1783.867109	1874.418558	1583.258881	1888.634462
ARFRP1	1734.177177	1214.420526	1239.751923	1427.784303	1297.746214	1547.469767	1265.277236	1254.060613	1457.644257
ARG1	0	0	0	0	0	0	0	0	0
ARG2	59.35943357	36.9184787	72.79392279	37.46263331	35.22234082	44.64871994	52.60407012	65.69426473	70.22657476
ARGFX	2.403945992	0.769831954	1.335504677	2.932198302	0.92490062	2.574509799	2.582123204	0.493727857	0.561541566
ARGFXP1	0	0	2.064804835	0	0	0	0	0	0
ARGFXP2	2.062926261	0	0	0	0	0	0	0	4.080411796
ARGLU1	2005.469869	1362.180977	1504.968594	1338.349994	1101.72014	1313.46747	1727.752843	1441.350948	1715.955769
ARHGAP1	2045.697651	1442.246979	1568.182901	1527.027849	1301.145641	1661.719814	1572.076863	1503.326488	1702.239577
ARHGAP10	441.6819609	343.3376647	326.1880045	468.9024282	433.3975776	527.1346694	369.7662379	353.9144463	393.7496364
ARHGAP11A	1741.892411	1329.526304	1669.898274	1232.048453	1232.63769	1635.27897	1501.324149	1245.673802	1687.54385
ARHGAP11B	215.9429262	152.2737096	96.81808844	171.7667654	141.5497275	155.1407322	169.3667674	111.6304793	144.7858937
ARHGAP12	622.8376931	399.0787504	562.0997778	422.0145928	387.6705118	476.5395669	489.4507713	426.0620322	446.5253553
ARHGAP15	8.367049071	0.734551658	23.27190662	1.849774077	0.97887095	1.967988975	3.480483729	7.013672174	4.338789158
ARHGAP17	1612.791561	1121.978956	1385.445242	1080.453051	1031.974438	1071.234854	1236.06837	956.2930097	1273.470069
ARHGAP18	1265.677055	1055.141777	1115.550415	573.9679771	545.6665842	649.6542135	1030.350893	884.4808199	941.5909696
ARHGAP19	257.1463757	177.661458	207.7576422	227.2030775	193.1420234	214.2853139	227.9628867	179.2709398	225.6128719
ARHGAP19-SLIT1	0	0	0	0	0	0.69636533	0	1.411907622	0
ARHGAP20	55.85910404	44.67546274	50.17005898	41.92852928	33.90034032	41.78470805	47.62664046	39.63603584	47.3264739
ARHGAP21	1700.762136	1236.399914	1402.467115	1257.387442	1026.247427	1299.04078	1448.580791	1231.668239	1549.631327
ARHGAP22	1818.79257	1213.362825	1279.380133	2017.372189	1692.124924	2133.831004	1231.851689	1353.779539	1301.080606
ARHGAP22-IT1	0	0	0	0	0	0	5.909710709	0	0
ARHGAP23	3051.938618	2344.811567	2724.000342	1549.336107	1433.546103	1580.721866	2575.14779	2173.207961	2620.261948
ARHGAP23P1	2.468116049	0	0	6.928938437	0	6.911633608	1.911812145	6.865114006	0
ARHGAP24	280.860123	165.3310481	172.7617417	345.6238437	329.2273232	401.0687176	226.2131872	180.9608123	209.5875648
ARHGAP25	63.95446585	39.55419383	45.9688214	29.80791644	32.74870072	31.82633178	56.998986	70.65581432	46.01177723
ARHGAP26	47.26436832	39.85490306	50.74315338	57.04233583	35.483947	38.73458566	79.46891664	41.05155038	35.81636289
ARHGAP26-AS1	0	0	0	0	0	0	0	0	0
ARHGAP26-IT1	0	0	0	0	0	0	0	0	0
ARHGAP27	307.6876189	181.6043049	237.468613	195.329154	176.1378034	278.6171343	224.1635857	208.8847214	179.2694517
ARHGAP27P1-BPTFP1-KPNA2P3	115.8797473	90.47925076	100.9804287	75.42193976	89.09542826	106.189249	89.80886017	78.30064927	93.52908553
ARHGAP27P2	0	0	0	5.065392863	0	0	0	0	4.511810913
ARHGAP28	3.155588057	0.32379281	0.956113954	0	2.466212364	3.450845784	7.928286159	3.724332784	0.325409859
ARHGAP29	1810.669776	1343.845079	1516.195627	827.3094581	699.8262656	850.7843765	1475.558215	1298.831261	1499.145029
ARHGAP30	0.73327346	0	0	0.827780001	0	0	0.744017093	0.467176343	0
ARHGAP31	259.2725416	167.6410594	195.6901427	324.270804	328.9529513	351.5271899	186.0476895	166.1099055	223.4854028
ARHGAP31-AS1	29.17060332	18.43546863	26.18431624	22.04978488	21.58622373	25.62782133	14.92213316	11.04247474	25.12611708
ARHGAP32	158.5706635	128.8319605	140.1502202	98.9958131	88.95786752	100.5047111	158.7226817	124.6494944	180.0706177
ARHGAP33	781.9498702	518.0954662	603.3347062	349.1097281	214.6955832	271.6317944	751.4108773	781.507135	904.9259404
ARHGAP35	741.2696858	559.355719	634.0521439	418.1924886	393.8603362	501.9519867	707.9684697	660.257142	711.6610975
ARHGAP36	0	0	0	0	0	0	0	0	0
ARHGAP39	123.9554199	92.18984051	90.40940688	81.88151681	68.79170401	86.26700442	91.38913481	71.88072109	94.16945409
ARHGAP4	100.2207527	47.86383093	100.6442045	35.21926678	36.52839553	54.32269188	93.59617732	80.29036067	135.9254872
ARHGAP40	2.806734656	0.94245417	0	0.579199347	2.848479483	0.9355376	0.948174937	1.949314001	0.922657312
ARHGAP42	88.24241216	65.98592121	95.60712619	95.34921841	90.59292318	57.44821042	114.4677813	113.4786369	107.4899261
ARHGAP42P1	0	0	0	0	0	0	0	0	0
ARHGAP42P2	0.825326578	0	0	0	0	0	0	0	0
ARHGAP42P3	0	0	0	0	0	0	0	0	0
ARHGAP42P4	0	0	0.589435999	1.159041022	2.837281094	0.581595311	0	1.773203692	1.185602018
ARHGAP42P5	0.592147358	0	0	0	0	0	0	0	0
ARHGAP44	3.8627793	10.43012677	6.611208276	2.62046403	0.648325397	1.013074253	8.496911835	9.869298041	9.442554778
ARHGAP45	70.38686875	40.15911241	50.40721376	34.16024896	18.68007141	19.36751814	100.7831123	80.83679596	85.24274057
ARHGAP5	962.0169924	689.101875	736.6179923	580.4731851	547.7213409	669.5086663	767.1437514	717.1303234	789.1502604
ARHGAP5-AS1	41.66707658	19.44438203	20.24894809	16.85217538	6.937367952	22.7434184	29.47149608	24.36307408	31.3400698
ARHGAP6	26.83902122	14.17022469	19.12647714	5.200846839	5.664999263	14.48791941	17.47066591	14.96220898	23.149048
ARHGAP8	0	6.805468219	7.054566039	3.549783127	3.057364647	0	0	0	0
ARHGAP9	8.108658042	1.176467967	17.90802005	0	3.604677394	12.28729231	3.183806151	2.565211404	14.78226404
ARHGDIA	24092.98568	17007.29888	18217.48429	18746.86362	15828.7524	19955.02446	18945.37517	17884.71295	21016.61229
ARHGDIB	495.7471547	310.2432007	399.8738844	271.7365779	254.4195629	350.0367568	378.8652389	357.8904484	412.9586782
ARHGDIG	9.66518711	3.257876606	10.10807315	11.8087758	0	23.45558397	3.642342484	3.288059518	2.120967295
ARHGEF1	2047.770782	1238.066162	1468.233107	1349.923575	1116.44777	1413.842907	1414.171041	1419.016238	1471.925107
ARHGEF10	1194.760558	807.8432843	834.4132798	672.9643811	593.4141528	700.7193238	811.6411734	815.5751716	892.1898736
ARHGEF10L	409.0874138	305.9380383	341.3820622	351.4625986	267.7971857	384.4575106	332.2889666	345.0628322	371.5564262
ARHGEF11	523.1622357	358.6324998	367.1424218	391.2597832	322.9751013	429.320759	369.464914	321.3544706	386.4043794
ARHGEF12	1734.440641	1191.589364	1421.738153	1128.143616	958.2462883	1121.733268	1386.281724	1239.502541	1454.349079
ARHGEF15	3.361814652	3.415295871	3.207886597	3.425068864	4.325076804	3.380941689	18.28869371	0	6.531813028
ARHGEF16	80.34112125	57.64325849	47.62309398	71.27666787	88.73224156	95.97992775	95.17119631	87.41589361	97.87281817
ARHGEF17	2541.280269	1605.706904	1893.239872	1299.541248	1116.606183	1255.290421	2089.54296	2002.41959	2163.177107
ARHGEF18	1119.680901	860.9043989	825.4835332	567.2027807	475.5531522	635.8299887	807.5395075	846.1896264	954.3001429
ARHGEF19	505.937858	358.861811	342.710404	434.2129016	367.2116228	442.1502446	332.5029502	364.3265495	461.8470495
ARHGEF19-AS1	0	0	0	0	0	0	0	0	0
ARHGEF2	2534.542113	1616.339716	1707.85855	2482.677636	1931.28231	2487.905751	2085.990421	1885.266326	1997.09597
ARHGEF25	792.7914883	638.9697981	600.2241814	400.015783	401.8247077	473.7712296	731.7742493	795.2957484	759.7529777
ARHGEF26	90.10616513	70.21970707	77.20050951	38.46564019	28.47845741	34.67209313	67.09940396	50.9922187	66.69053669
ARHGEF26-AS1	22.40390384	27.89634281	16.37821875	11.29054616	7.691385244	18.19646965	12.42630924	15.64931378	15.80037885
ARHGEF28	450.0548327	336.4585867	371.7528635	231.8797596	173.6869235	218.9040256	362.0809811	301.6658825	387.5227339
ARHGEF3	40.86957304	21.52596246	14.22193417	9.541668847	7.748058632	15.39236348	13.98609446	13.91802006	14.53081829
ARHGEF3-AS1	0	0	0	0	0	0	0	0	0
ARHGEF33	176.0668486	118.5450592	165.0942827	101.6302028	119.4242093	107.8489221	169.1761168	123.2974848	150.4367734
ARHGEF34P	36.59494083	27.02898006	32.74536127	25.37465069	7.03324706	9.927001102	36.0775422	30.71286531	44.0532462
ARHGEF35	65.63846462	62.79351607	70.53799952	26.40080705	31.22315304	40.36451708	58.61996018	51.84652125	55.14555266
ARHGEF37	16.76288162	19.39452151	9.926038657	11.77049309	0.958291354	0.642571284	25.82275542	23.46795527	30.47971644
ARHGEF38	0	0	0	6.25472604	0	0	0	0	0
ARHGEF38-IT1	0	0	0	0	0	0	0	0	0
ARHGEF39	195.3622264	128.7602833	178.0886047	112.53155	82.89113456	137.100913	202.2957188	111.2265286	177.3954703
ARHGEF4	19.10932068	20.92207459	13.88895928	17.05286411	11.69656973	15.70586166	53.28199807	59.14013621	37.41262291
ARHGEF40	1160.909983	744.432202	813.5987322	1346.117555	1168.643848	1538.882294	901.4276653	802.3157734	957.466844
ARHGEF5	216.3982995	161.3135822	140.8479282	82.80921725	89.40464463	107.0823428	175.4500922	162.7019337	188.1459782
ARHGEF6	37.03368633	30.07818112	31.76607497	22.49946536	20.15160333	18.0118237	36.31148206	27.9793159	28.10034491
ARHGEF7	731.1277554	485.6453455	563.2905562	476.9553623	524.9324829	605.4404649	782.0725621	658.1948037	753.2374997
ARHGEF7-AS1	0	0	0	0	0	0	0	0	0
ARHGEF7-AS2	0	0	0	0	0	0	0	0	0
ARHGEF7-IT1	0	0	0	0	0	0	0	0	0
ARHGEF9	307.1858438	251.134747	259.2355034	198.8649344	136.035986	192.1547533	252.4973734	197.4516764	260.3907281
ARHGEF9-IT1	0	0	0	8.057841463	0	0	0	0	0
ARID1A	983.3299753	647.8924491	776.8722587	737.6017745	598.3022155	732.4937767	781.90951	677.0424231	793.0117083
ARID1B	570.2894998	386.4388489	416.3632213	430.1937827	357.8691453	411.7899273	496.8783744	421.2231409	507.8342706
ARID2	208.273554	167.2545651	176.4470211	128.2179528	94.17890631	113.8627866	190.37611	175.6282861	170.4808601
ARID3A	447.7855898	322.8729885	380.1641379	350.2363958	304.1524946	451.4373218	424.3316807	426.4927671	549.0347266
ARID3B	74.41880728	42.51808228	53.16424775	51.18975804	26.8278194	62.00957936	67.39902673	57.86454653	57.11539459
ARID3C	10.25541357	6.434842587	8.070259231	5.219191705	1.288450756	3.875508936	14.29417197	7.823132678	10.18219591
ARID4A	217.834022	139.4024354	190.9074383	142.6398444	121.2067975	179.4102116	226.9879511	171.4583952	185.3775495
ARID4B	310.7805075	282.6650892	326.3212751	370.5107624	369.6343364	372.6631802	348.8331911	282.9310315	325.7099331
ARID5A	336.4745525	256.3444422	229.0947653	285.3671994	279.2316495	345.5793991	296.8465454	298.8649421	294.3125028
ARID5B	907.4926736	688.9078227	761.328173	528.5997339	439.5098991	539.3605351	868.2751584	787.8082445	877.2545766
ARIH1	1321.742896	873.049002	1028.604288	1042.305054	960.8196463	1287.912088	1095.14652	1077.858061	1163.701064
ARIH2	2310.440645	1564.784273	1804.061161	2119.340976	1806.047136	2251.997962	1855.489614	1538.226441	1881.638875
ARIH2OS	47.18336038	24.4105293	37.16627356	17.18574877	19.61455767	39.98243853	32.18320785	44.3616935	28.76932654
ARIH2P1	0	0	0	0	0	0	0	0	0
ARL1	2456.965647	1918.399305	2082.697414	2577.116574	2265.558312	3042.559398	2225.860658	1974.297092	2289.614688
ARL10	258.2734636	233.9318985	195.009725	181.0698996	144.1342158	217.6936877	412.4373345	324.2798378	360.9632767
ARL11	0	0	0	0	0.901527106	0	0	0	0.501843688
ARL13A	0	0	0	0	0	0	0	0	0
ARL13B	574.6028802	423.1194486	425.4227283	551.4842359	381.3742232	519.9457852	444.4189235	421.7241058	432.6661784
ARL14	0	3.235888156	3.167542535	7.719771774	7.726048006	0	3.202619851	0	1.605179773
ARL14EP	869.3650649	605.7965064	698.0933026	809.1261751	737.632754	976.0467973	763.2795799	664.5297019	809.9278894
ARL14EPL	0	0	0	0	3.491217043	10.64682739	0	0	0
ARL15	219.4744404	118.8996659	161.4486357	99.64556568	87.9180528	136.6023746	162.2840314	151.605844	143.1088454
ARL16	1547.01242	1114.098351	1292.410909	1168.97302	1021.656655	1238.409174	1242.451241	1216.667029	1315.102488
ARL17A	590.9933774	430.3278809	465.4552329	373.2684019	350.1269017	356.2494903	469.5185829	403.0905507	446.0598623
ARL17B	800.3875663	641.3325901	734.6445723	534.7633522	432.2309916	722.6702799	675.2620074	633.1655449	622.8364574
ARL2	5486.495859	4213.396253	4272.226807	3835.193336	3571.61264	4554.01191	4710.023262	4220.571772	4999.74126
ARL2-SNX15	8.949351817	0	3.469281018	3.329053783	3.206896077	3.275381436	0	0	0
ARL2BP	2177.088124	1586.273989	1792.174771	1365.435573	1184.95747	1480.19758	1800.646638	1680.002221	1823.786204
ARL2BPP1	0	0	0	0	0	0	0	0	0
ARL2BPP10	0	0	0	0	0	0	0	0	0
ARL2BPP2	0	0	0	0	0	0	0	0	0
ARL2BPP3	0	0	0	0	0	0	0	0	0
ARL2BPP4	0	0	0	0	0	0	0	0	0
ARL2BPP5	0	0	0	0	0	0	0	0	0
ARL2BPP6	0	0	0	0	0	0	0	0	0
ARL2BPP7	0	0	0	0	0	0	0	0	0
ARL2BPP8	0	0	0	0	0	0	0	0	0
ARL3	403.0860428	309.3835253	344.6149948	296.2141287	243.9363261	307.6084072	377.0352067	346.227236	396.0269412
ARL4A	1307.418716	851.052199	937.6256768	319.9523607	321.8586469	304.8459844	954.3066034	918.9436154	989.633227
ARL4AP1	0	0	0	0	0	0	0	0	0
ARL4AP2	0	0	0	0	0	0	0	0	4.164907668
ARL4AP3	0	0	0	0	0	0	0	0	0
ARL4AP4	0	0	0	0	4.99305049	0	0	10.27850784	0
ARL4AP5	16.9105808	4.088520367	12.54154824	0	0	4.017654773	8.358513078	4.262390734	8.5611379
ARL4C	334.9839043	224.992069	274.1031798	124.6082277	107.9633737	133.9228678	209.2789784	186.4667959	215.1041646
ARL4D	252.702044	185.0061371	220.958523	128.2997596	97.14289047	171.346794	223.6478212	220.3275864	236.6756249
ARL5A	555.3186376	327.7203466	566.5530413	382.3820238	357.0271764	478.3462301	393.0243889	345.621531	433.5010352
ARL5AP1	0	0	0	0	0	0	0	0	0
ARL5AP2	0	0	0	0	0	0	0	0	0
ARL5AP3	0	0	0	0	0	0	0	0	0
ARL5AP4	0	0	0	0	0	0	0	0	0
ARL5B	354.4502422	251.7393435	290.986565	269.1674487	252.1975799	327.4360194	309.4023417	283.9169513	327.8572566
ARL5C	0	0	0	0	0	0	4.728916178	0	4.628949864
ARL6	166.9489078	146.859655	176.8854456	181.3601031	95.30003996	174.3441081	277.1555329	206.97385	205.4471595
ARL6IP1	7189.626404	5262.167392	5883.441358	5550.643292	4759.919883	5697.832591	6057.775976	5452.112745	6359.803344
ARL6IP1P1	0	0	0	0	0	0	0	0	0
ARL6IP1P2	0	0	0	0	0	0	0	0	0
ARL6IP1P3	0	0	0	0	0	0	0	0	0
ARL6IP4	6047.667568	4283.272305	4465.525123	4277.880513	3902.773809	5029.655539	5022.752328	4670.313869	5620.770769
ARL6IP5	3202.547482	2317.887268	2574.612873	1420.346128	1292.903944	1569.599454	2797.953057	2405.382037	2845.574799
ARL6IP6	1026.367314	704.7274388	759.8552234	964.8817	822.0909134	1090.873793	908.7223538	769.9535261	940.0392547
ARL8A	808.6539482	577.3390286	595.8358811	729.3560908	608.8364924	859.2897503	664.6358976	634.2247665	680.1398385
ARL8B	2542.287931	1817.720613	2056.04135	2604.562396	2415.747426	3044.935996	1911.530727	1757.996446	2015.339448
ARL9	56.9728357	45.33309777	60.15356599	61.8228437	43.47028373	64.75820161	49.21915288	42.56424206	52.89135324
ARLNC1	2.658765348	2.44606475	4.376299023	6.322581492	10.844629	16.97317615	8.046677904	8.16004138	11.12570181
ARMC1	1166.551575	867.9177911	967.3273027	828.9996781	662.4917224	902.8906129	887.5991134	951.2232295	1045.590343
ARMC10	973.2382284	657.1948518	771.4008354	768.4108736	681.291319	936.7086763	811.3647567	744.1540872	884.0658037
ARMC10P1	0	0	0	0	0	0	0	0	0
ARMC12	21.84912399	0	0	0	0	0	6.40991139	8.739194838	6.489739726
ARMC2	163.8646031	71.36194692	149.1272366	79.79156372	89.9791924	87.25290001	113.1166479	103.5439026	118.8040712
ARMC2-AS1	0	0	0	0	0	0	0	0	0
ARMC3	0	0	0	0	0	0	0	0	0
ARMC4	155.4564048	120.2102978	154.1956462	58.21689547	44.82249488	48.23917676	146.8654552	147.3268149	160.8528442
ARMC4P1	8.440793612	4.092235212	0	0	0	0	3.75677345	0	3.796296105
ARMC5	231.1291994	138.5873382	159.3397631	222.14511	183.9627743	267.0542028	165.3957818	178.9852027	179.7761045
ARMC6	1307.607145	900.3552856	961.3539386	821.7494733	674.6954224	868.7803437	844.5064477	783.471598	925.1503566
ARMC7	286.4872187	175.6732855	215.4776126	148.1533504	123.6931352	173.5117649	204.4936973	205.8670405	203.4834164
ARMC8	870.0483349	609.8096777	712.2644094	780.3344975	593.3227485	829.3691641	667.0648961	694.1814141	837.5089273
ARMC8P1	0	0	0	0	0	0	0	0	0
ARMC9	1304.90711	966.9586872	995.117602	632.476335	542.3369828	541.1230646	905.9693839	799.2772655	939.675291
ARMCX1	1249.541257	936.5465565	1029.206247	1418.893132	1355.831327	1723.537678	856.7420302	787.957175	832.5590812
ARMCX2	2053.852891	1431.461816	1617.252878	1562.509956	1196.830102	1516.936717	1694.496518	1568.036509	1941.163087
ARMCX3	1640.405905	1096.537203	1314.312114	1562.901827	1260.905331	1523.836606	1278.142887	1197.786551	1283.845194
ARMCX3-AS1	5.196303915	5.319315266	0	0	0	5.326652606	0	0	0
ARMCX4	406.8199718	269.9563234	314.341413	207.7014306	178.5746682	235.1175791	313.6162043	298.6727985	275.2003962
ARMCX5	253.895463	161.1446963	184.8795705	194.5758582	203.8526578	196.9191314	230.6316901	140.8829648	179.9360959
ARMCX5-GPRASP2	185.6095783	158.6761922	206.0571673	213.1902456	127.6389205	211.0718942	172.8765253	234.7559261	208.0802336
ARMCX6	2403.142666	1736.295278	1840.013697	1561.684746	1417.543741	1696.416861	1901.712159	1577.811538	1795.678148
ARMCX7P	0	0	0	0	0	0	0	0	0
ARMH1	16.06541493	0	15.31485268	0.828884804	0	0	6.537341836	0	0
ARMH2	0	0	0	0	0	0	0	0	0
ARMH3	446.0134097	328.6784976	396.0086814	374.5921356	281.1340582	459.1814958	424.1665213	362.3211306	403.3199963
ARMH4	17.57797341	13.95113469	20.05851748	2.558029819	6.535929554	14.39492049	20.11626314	11.12236198	31.49629984
ARMS2	0	0	0	0	0	0	0	0	0
ARMT1	1522.985656	1233.406006	1268.157771	1784.114946	1627.014674	1994.62235	1271.254686	1083.893585	1206.565888
ARNT	727.9886751	518.6456928	558.1008298	630.8765547	533.7275568	661.7477909	627.3798714	487.9921485	609.3806308
ARNT2	247.544128	126.166956	213.7405884	101.8939681	121.1210265	97.91806244	142.2342382	112.9111652	129.5058428
ARNTL	296.5531836	189.5700933	185.4778058	171.0436077	160.3714029	262.7062638	223.3036142	226.0943148	236.0863032
ARNTL2	776.8025192	614.4012268	646.0338086	1044.510241	781.577436	1115.527801	643.037643	590.8464797	706.4264909
ARNTL2-AS1	0	0	0	0	0	0	0	0	0
ARPC1A	5708.703319	3936.562484	4574.240725	3942.137256	3429.679237	4580.790248	4544.941575	4309.817184	5025.073956
ARPC1B	12877.49138	8801.138502	10092.45405	9744.292475	9083.298757	10868.19952	10600.4885	9163.014232	10597.36518
ARPC2	15962.25731	11902.73035	12754.59508	14331.8403	12523.3425	15609.18084	13631.69576	13174.01253	14582.1398
ARPC3	13873.45103	10249.19099	11583.753	11776.00932	10740.54626	13030.93283	12192.58816	10846.32934	12196.33259
ARPC3P1	0	0	0	0	0	0	0	0	0
ARPC3P2	0	0	0	0	0	0	0	5.002435666	0
ARPC3P5	0	0	0	0	0	0	0	0	0
ARPC4	5718.093847	4131.355414	4554.624973	4791.990936	4320.731398	5348.145777	4692.165659	4497.261918	5327.205806
ARPC4-TTLL3	603.5562418	380.5485855	424.1680541	412.8769735	420.3213799	466.146163	544.1804087	470.3829327	694.1427792
ARPC5	11113.69543	8197.325465	9266.955193	9458.165479	8004.524684	9793.287721	9484.349364	8369.466742	9591.25228
ARPC5L	2418.82108	1713.191086	1946.9391	2026.969047	1897.205907	2288.126241	1845.124484	1652.168718	2042.783251
ARPIN	543.4907875	367.8355036	406.0807508	321.778677	214.6361386	277.9863921	441.9655764	435.0925956	496.9574084
ARPIN-AP3S2	822.5197528	570.7167045	586.5912325	570.9801789	575.5427959	658.7332965	715.4409363	606.8797781	687.4605662
ARPP19	1674.235291	1229.800609	1357.704489	1271.699727	1098.877135	1244.768137	1393.527741	1254.384677	1338.871969
ARPP21	0.550487845	0	0.581870005	0	0	0	0.581777494	0	0
ARPP21-AS1	0	0	0	0	0	0	0	0	0
ARR3	0	0	0	0	0	0	0	0	0
ARRB1	225.2539775	143.3339874	180.4163456	125.3923551	96.81622915	106.3133133	190.3476737	147.1729278	189.6923198
ARRB2	469.4884553	363.0932563	400.4393417	167.2750222	193.8758018	263.9447379	428.9246101	347.2848054	429.5675039
ARRDC1	771.4095031	593.8517963	528.9111062	381.1325174	375.9422549	500.930942	668.8564885	598.1506826	678.0348569
ARRDC1-AS1	583.5188864	427.889117	480.0502014	362.0031891	270.2037945	308.8242935	420.2208999	420.2821329	514.6193563
ARRDC2	311.5529493	200.736962	213.0839123	246.8486315	277.7322011	272.9828699	309.7931639	254.929981	297.0860361
ARRDC3	415.9715583	310.4895186	325.0359337	153.199936	105.6473287	155.2026376	378.0134683	360.7322982	445.1062545
ARRDC3-AS1	54.35404908	37.41429248	26.60390872	34.41820759	26.02212597	57.63401111	31.78753619	37.50051218	41.69617407
ARRDC4	87.98498159	61.13244328	66.98577718	68.83417988	52.05372401	71.37658726	84.86712829	65.95977987	76.54294346
ARRDC5	0	0	0	0	0	0	0	0	0
ARSA	402.5999051	301.3264119	325.3254337	326.3914861	294.6422911	351.8743445	342.7771346	331.0243879	362.0635769
ARSB	363.6709211	266.0192957	345.5377377	361.1576552	394.4992576	390.6606119	363.9205852	332.8835757	354.8145027
ARSD	323.8125217	240.3914137	228.3776798	294.8150628	197.5062832	316.4887339	324.8808119	304.061383	355.3087162
ARSD-AS1	0	0	0	0	0	0	2.54540983	0	0
ARSDP1	0	0	0	0	0	0	0	0	0
ARSE	118.9057046	90.66248068	76.07203794	39.76028935	28.16413021	41.12166123	120.6276305	89.19903375	97.393247
ARSEP1	0	0	0	0	0	5.199067775	5.316355554	5.214010048	0
ARSF	0	0	0	0	0	0	0	0	0
ARSFP1	0	0	0	0	0	0	0	0	0
ARSG	74.11875674	47.89060788	59.31495026	47.77666216	52.58574971	28.61893926	81.13358634	47.1471126	64.08578015
ARSH	0	0	0	0	0	0	0	0	0
ARSI	495.8518738	325.0495874	391.6655636	381.3647573	278.8397741	339.3682428	440.6048203	369.4213918	439.1105671
ARSJ	1194.040161	924.8909386	940.3649461	769.9291297	723.906232	902.3709793	917.0214806	838.6831339	947.7613983
ARSK	393.1195746	292.2389978	363.3430121	236.7566937	191.2341859	262.2821921	388.7531712	308.0089952	329.4150703
ART1	0	0	1.412042177	0	0	0	0	0	0
ART2BP	0	0	0	0	0	0	0	0	0
ART2P	0	0	0	0	0	0	0	0	0
ART3	5.785840049	1.142046595	1.239186489	17.74544707	0	7.953970695	2.291818418	3.373089522	8.21592726
ART4	0	0.717287289	1.455849046	0.343285387	0	0.685099561	1.775977739	2.123795383	1.861273463
ART5	9.968359114	2.389977024	2.436416103	2.388609578	0	1.603935658	0	1.614685798	1.572671027
ARTN	37.11646511	29.21616517	44.00230334	20.54707308	7.770296407	26.4056945	39.03426369	50.65451881	60.34936999
ARV1	595.3994712	448.1748364	547.8301945	334.4388447	338.6152303	369.5807814	486.7790736	497.4939839	533.8854898
ARVCF	331.0355249	229.9096227	245.2071069	94.65501679	66.39904212	69.01280367	279.3885743	309.1010513	291.7701308
ARX	0.700918306	0	0	0	0	0	0	0	0
AS3MT	338.9998153	242.5039798	338.160016	175.2520589	168.3221228	200.6504385	338.4162662	350.3617327	422.465337
ASAH1	2656.864228	2045.411678	2056.268828	1744.929437	1401.336356	1839.512768	2133.217886	1965.484153	2067.598009
ASAH2	18.79750463	16.41115696	43.77159981	38.07628709	107.2162844	59.31765209	37.76620508	86.91516136	173.3873837
ASAH2B	192.5452269	167.0776268	103.428016	249.8315736	150.4871323	176.069883	115.8454469	95.13226174	96.99449096
ASAP1	2904.796528	1984.163259	2248.078707	2707.982303	2390.174848	2934.499862	2381.583938	2098.833352	2330.167441
ASAP1-IT2	11.14175873	2.52618087	3.416603674	5.082375997	4.174046198	1.689273856	2.827869227	6.853525352	3.38888898
ASAP2	718.8881425	521.8572305	550.8493819	770.9259189	665.2625173	810.0727893	663.2513769	601.4252221	627.7370836
ASAP3	400.2537962	254.1627112	260.0602442	132.1381275	106.3754966	198.7970224	290.2944776	286.7953589	296.4819377
ASB1	1010.975324	780.9119209	782.4758141	1085.094431	954.3523381	1188.726852	939.6718806	707.4136093	817.9300112
ASB10	0	0	0	0	0	0	0	0	0
ASB11	0	0	0	2.373373575	0	0.704533012	3.394336786	4.378300544	0.982973125
ASB12	0	0	0	0	0	0	0	0	0
ASB13	141.2386252	102.5660698	98.32341292	72.26186944	37.56073709	53.70200435	143.2295109	111.0684063	121.7441783
ASB14	0	2.18948273	0	0	0	0	0	0	0
ASB15	0	0	0	0	0	0	0	0	0
ASB16	5.707443329	0	7.564357499	2.01438971	2.994580981	3.003904574	5.366880875	3.313028647	6.691562617
ASB16-AS1	304.3627515	238.8298258	229.612692	203.0965607	162.5803476	163.3178496	299.5807016	234.1687676	316.7940737
ASB17	0	0	0	0	0	0	0	0	0
ASB18	1.458293055	0.575564857	1.38222884	1.364405897	0.456544466	0.453700671	5.22251556	2.507221593	0.462295858
ASB2	4.626096833	1.74125333	2.384568883	3.02669749	1.153456788	1.736195783	4.186441798	2.34218799	2.381386528
ASB3	498.1625661	371.1459678	410.1271108	410.2286582	339.5328394	454.0830876	410.4098981	371.6398279	412.2539101
ASB4	1.410060463	0.468564421	0.919896798	0	0.444846352	1.362763714	0	1.079652999	0.457191179
ASB5	1.47963305	0	1.462324019	0	0	0	0.751253132	4.381209343	0
ASB6	638.9098612	448.2880855	452.2488022	568.0388082	483.8105218	609.3539113	430.6282275	404.5531413	507.2901924
ASB7	239.1375805	150.0207094	175.505968	181.8373009	175.2368896	220.830472	155.3190777	149.8093234	183.1664712
ASB8	609.1233394	526.1864428	614.6288141	366.6363985	389.3681013	425.0155173	633.9757616	571.5482059	589.2710162
ASB9	0	5.977186499	2.352004276	0	0	3.563137333	0	0	0
ASB9P1	0	0	0	0	0	0	0	0	0
ASCC1	738.2997047	568.4628454	612.483843	651.8868742	558.2680655	563.394053	684.3077918	631.0780048	690.7134289
ASCC2	1460.366456	1097.318738	1182.169751	1119.479032	904.1665645	1046.318522	1205.139789	1055.339095	1182.663523
ASCC3	686.9753047	534.1484519	655.4512654	702.2324343	589.4213479	795.3309395	593.3063564	593.1099439	716.0086184
ASCL1	0	0	0	0	0	0	0	0	0
ASCL2	0	0	0	1.217749735	1.162996998	0	0	0	2.294445783
ASCL3	0	0	0	0	0	0	0	0	0
ASCL4	0	0	0	0	0	0	0	0	0
ASCL5	1.382357487	0	0	1.425915157	0	0	0	0	1.374475145
ASDURF	110.9725388	51.28501043	150.5348435	144.1676326	252.8758207	146.6891806	206.3387855	37.31553586	106.5311599
ASF1A	741.6827993	593.3942261	640.5980095	430.5638403	381.5514667	486.8011332	550.8577489	538.9938616	546.8522345
ASF1B	2510.638947	1734.738994	1953.478158	1670.840095	1455.109248	1724.781165	1846.826147	1913.800594	2084.557714
ASGR1	21.67210107	21.6193919	12.91866205	13.32942138	32.01192395	26.26920971	15.01160614	17.97125653	37.82997072
ASGR2	0	0	0	0	0	0	0	0	0
ASH1L	327.2507821	218.6805679	269.3115575	254.4782462	198.0672929	295.8339046	278.6330304	245.4981197	262.6716599
ASH1L-AS1	100.4129027	60.38788516	66.63788377	60.78951897	106.6652464	102.7479228	74.41133198	66.58938354	79.88086625
ASH1L-IT1	0	15.6331867	0	15.47810888	0	0	0	0	0
ASH2L	1293.440569	916.6239901	1137.206994	948.4917948	862.715875	1041.031779	985.0291724	975.8758105	990.1402291
ASH2LP1	0	0	0	0	0	0	0	0	0
ASH2LP2	0	0	0	0	0	0	0	0	0
ASH2LP3	0	0	0	0	0	0	0	0	0
ASIC1	79.1913427	68.87927054	62.30031599	46.28291725	32.58715317	34.39641977	86.58110461	73.7398856	73.24002803
ASIC2	0	0	0	0	0	0	0	0	0
ASIC3	58.06663803	50.5436518	47.96448871	48.5946274	33.10582257	23.68982747	55.51404934	28.766623	47.30978966
ASIC4	3.520829133	1.229957448	0.506826729	0.621104779	2.831352535	1.672431532	5.44703587	2.077789823	2.19589861
ASIC5	0	0	0	0	0	0	0	0	0
ASIP	4.242187012	0	0	0	4.267835546	0	0	0	0
ASL	1467.447583	1022.173059	1102.257295	1041.479304	890.3037311	1185.568043	1255.047585	1170.320394	1289.674013
ASLP1	7.062007798	3.609434129	3.626222029	3.522342906	3.473136074	3.508385697	3.575339307	10.54783933	3.390259183
ASMT	0	0	2.763769863	0	0	0	0	0	0
ASMTL	575.9999446	420.632134	462.8295246	390.8769048	326.9431017	405.6845847	478.6068441	451.9966488	502.6387282
ASMTL-AS1	1731.821644	991.6298998	1086.911918	944.5066936	973.6719443	1055.717131	1289.008725	1221.331066	1269.699887
ASNA1	3941.719305	2842.465097	2990.676372	2814.47631	2431.148436	3116.588313	2981.05154	2924.079977	3468.646985
ASNS	1156.256213	776.3392037	931.4012592	646.3777103	605.6375465	775.797561	1081.781303	931.9464343	981.444865
ASNSD1	1312.396728	982.3183281	1086.858576	936.729395	804.5426062	1055.584082	1054.813527	1026.336603	1043.662037
ASNSP1	2.436721344	5.406023626	1.367381467	2.702476376	0	4.019400967	2.130315117	5.463398814	1.365259856
ASNSP3	0	0	0	0	0	0	0	0	0
ASNSP4	0	0	0	0	0	0	0	0	0
ASNSP6	0	0	0	0	0	0	0	0	0
ASPA	0.41836596	0	1.523895556	0.313712639	1.247132562	0	0.746733781	1.166847149	0.96994276
ASPDH	0	0	0	0	0	0	0	0	0
ASPG	23.51757548	18.0685149	29.46660573	30.80843109	19.97192938	24.65730352	6.150962771	11.7274852	17.08211003
ASPH	8857.678558	6308.671594	7329.480891	6319.228236	5578.176949	6817.481129	8162.497631	7230.000185	8420.198731
ASPHD1	365.9288186	272.8403534	332.1013625	373.0328733	328.2167197	412.4215989	332.488732	292.499932	383.6018299
ASPHD2	51.88884439	43.80910922	43.46061137	94.88538104	100.3923995	111.2569016	59.34391948	50.21072921	61.53236594
ASPM	1264.687311	1007.823556	1091.316536	833.1087484	746.2729131	836.9715302	1112.523092	966.1214449	1052.9284
ASPN	12.76638969	6.563767054	4.414864247	3.39087136	2.184867036	1.061714209	0	3.476084267	7.351517023
ASPRV1	4.627297396	5.429794343	0.783708905	3.091135762	0.766328705	3.849175201	2.33843374	4.676068451	6.851365939
ASPSCR1	1081.773025	867.3383825	834.2493658	778.3755535	695.0741054	781.4107585	872.6715215	765.1029065	847.1553468
ASRGL1	107.4145823	60.66969807	64.69890212	72.55582409	99.0416875	85.46065702	87.44854059	62.98486999	64.21291352
ASS1	101.0236288	57.58886713	79.34908579	177.3140836	144.6235831	199.992067	95.47086986	81.48620272	89.05738665
ASS1P1	0	0	0	0	0	0	0	0	0
ASS1P10	0	0	0	0	0	0	0	0	0
ASS1P11	0	0	0	0	0	0	0	0	0
ASS1P12	0	0	0	2.987746764	0	0	0	0	0
ASS1P2	11.98893554	1.511147637	9.132913766	10.50045792	0	2.987146743	3.029970512	4.538796422	2.945372967
ASS1P4	0	0	0	0	0	0	0	0	0
ASS1P5	0	0	0	0	0	0	0	0	0
ASS1P6	0	0	0	0	0	0	0	0	0
ASS1P7	0	0	0	0	0	0	0	0	0
ASS1P8	0	0	0	0	0	0	0	0	0
ASS1P9	0	0	0	0	0	0	0	0	0
ASTE1	179.556253	132.86012	160.8834156	123.9985563	99.83320691	114.6293658	165.9402874	118.0957848	140.0987236
ASTL	4.84216804	0	1.433245935	0	0	0	0	0	0
ASTN1	0	0	0	0	0	0	0	0	0
ASTN2	134.4234531	77.07821383	86.969536	72.40197386	52.58418239	71.88594083	111.0528536	89.77374257	105.320142
ASTN2-AS1	0	0	1.007154766	0	0	0	0	0	0
ASXL1	1968.173259	1179.06269	1410.319716	1420.933575	1170.619285	1429.246592	1481.070883	1228.019162	1646.894377
ASXL2	267.9653632	202.8370522	243.1478758	234.5320317	189.6861051	234.617717	228.6472382	207.4370704	219.317916
ASXL3	0	0	0	0	0	0	0	0	0
ASZ1	4.710196225	0	1.847525614	0.877778756	1.794536168	1.752502983	0.95576643	1.854301	0
ATAD1	925.7843213	691.8931413	733.1054736	766.6296487	682.8480313	816.698385	744.5052084	684.1295599	745.8120992
ATAD2	1455.201907	1014.599048	1193.286687	1223.644423	1053.208287	1298.938684	1195.210447	961.7744896	1156.218921
ATAD2B	124.448761	76.68639425	117.2985465	91.76947714	72.48728597	92.89212137	105.8455464	75.17455167	105.1286628
ATAD3A	2514.111213	1636.871302	1635.948426	2146.69569	1749.452726	2086.90567	1634.898854	1481.886059	1747.929195
ATAD3B	1266.914474	927.3686547	1057.678909	1259.583071	1027.611654	1180.962963	883.1881513	997.2597628	795.1264963
ATAD3C	60.62998869	69.98975168	51.73313642	74.64410713	32.30224162	82.83897182	26.25813643	55.15747883	79.17625934
ATAD5	168.7884694	117.4052029	138.7735414	104.9845129	89.79293116	103.1376902	141.6892249	116.7197601	136.1126946
ATAT1	478.3675142	300.7218368	368.9434842	245.4563229	215.5932715	234.1623546	436.1231989	304.1967701	375.0838131
ATCAY	9.89866647	8.289237659	8.949432481	7.143321587	1.4106563	6.059772506	11.35540093	8.805748152	16.37707325
ATE1	369.5300254	267.7318181	324.7317048	315.4195856	282.1728281	315.1248436	299.8581847	257.1826245	286.1918181
ATE1-AS1	4.386944816	2.173249069	0	4.409062857	2.151680735	0	2.18073888	6.609093179	0
ATF1	883.9262953	697.5914996	769.3502138	564.9587462	575.5192406	685.1769003	726.6075147	625.2181251	787.9068412
ATF1P1	0	0	0	0	0	0	0	0	0
ATF2	704.1069991	446.9282159	563.4563439	637.9459572	597.4081162	761.8776054	591.2280645	564.1011227	637.9910674
ATF3	137.1502303	76.70606361	104.9894806	647.7369775	559.2826668	727.5208129	111.2318503	183.1531157	119.7091039
ATF4	6400.19709	4766.692522	5149.587207	6406.154771	5723.996352	7136.950616	5708.277679	5526.298096	6033.989759
ATF4P2	1.75726309	1.77322677	5.359996837	0	3.480881815	7.012631225	7.117519784	1.774530104	0
ATF4P3	1.732021267	0	0	0	0	0	0	0	1.767320501
ATF4P4	0	0	0	0	0	0	0	0	0
ATF5	1548.22844	1069.895125	1167.018908	1881.829342	1702.182418	2201.458316	1134.71978	1117.317846	1250.147918
ATF6	594.7665347	461.934152	480.897569	427.7833597	370.8351989	467.5472303	537.3850577	520.4141774	520.5646417
ATF6B	2649.687656	1954.802988	2505.227229	1886.834048	1777.013779	2090.53536	3038.746786	2122.516861	2612.692917
ATF7	500.4853841	409.0296192	467.4033933	405.9224191	405.0778738	448.2994673	425.4989172	428.7107843	509.2194118
ATF7IP	488.2461313	349.8827072	393.6265554	375.7092712	323.8897802	398.303929	374.9645572	346.4656877	403.5627372
ATF7IP2	16.96973851	14.42796626	29.06892855	4.35338593	16.16722559	35.15269082	31.51279523	23.96026363	10.23643984
ATG10	257.7703379	144.1281055	160.1510322	120.0543585	116.959587	93.33179615	191.9747921	231.9200335	197.7219263
ATG10-AS1	0	0	0	0	0	0	0	0	0
ATG10-IT1	0	0	5.866965872	5.739296944	0	5.720532045	0	0	5.665172853
ATG101	1965.062212	1335.39518	1367.494933	1697.65582	1456.484651	1894.874305	1646.77068	1383.666166	1679.13451
ATG12	1541.026897	1110.371567	1128.202963	1176.444109	1061.09302	1442.224195	1442.036569	1092.697728	1478.380162
ATG12P2	0	0	0	0	0	0	0	0	0
ATG13	1486.27093	1176.244969	1160.130746	1374.951626	1174.795557	1327.144987	1155.604231	1029.356704	1187.047207
ATG14	305.2699564	216.7405596	254.6903096	213.2278089	180.1657254	228.7505891	261.6091454	240.9846415	256.5507467
ATG16L1	483.8127247	329.1676762	355.3625012	337.6034884	328.0864276	387.8236097	329.4971506	324.1407274	374.7495641
ATG16L2	925.1916037	535.6662133	635.808	690.2744845	563.9146885	651.1647277	652.1126763	573.998415	777.1530824
ATG2A	448.5029858	308.6189114	348.850054	320.4448202	272.2714759	366.9775439	350.5132215	310.0353574	352.1002105
ATG2B	386.1705698	280.5404337	357.4968468	267.5500943	230.3065919	306.2694988	357.917136	270.2683791	293.9685549
ATG3	2707.74484	1964.696351	2188.738663	2347.858306	1974.259228	2486.780526	2210.605134	2078.008355	2380.397403
ATG3P1	0	0	0	0	0	0	0	0	0
ATG4A	273.9608515	222.6559895	285.9298009	255.6485922	194.7849838	229.9908094	275.4131202	250.6151388	285.1243222
ATG4AP1	0	0	0	0	0	0	0	0	0
ATG4B	1620.909673	1165.108163	1406.643331	1340.620159	1100.278114	1385.725773	1348.719093	1121.29685	1663.467873
ATG4C	351.3313313	239.9985419	255.4318956	114.4937827	117.8260652	124.2960995	255.6830838	200.03085	239.8869517
ATG4D	599.4685971	492.7717721	537.4475398	455.4306414	397.8218174	706.3683746	508.8745075	456.3692481	515.6631288
ATG5	979.0137736	645.1284752	748.7037783	755.5122226	753.2262495	759.7455868	833.0416429	804.0462526	835.671807
ATG7	1108.756144	799.9674896	828.8674536	1195.379248	989.9110849	1269.411076	795.2626923	672.7715619	863.999955
ATG9A	1381.508179	992.0060655	1002.934697	772.7354319	727.7253597	880.1676137	1305.103655	1258.800163	1471.743703
ATG9B	14.81935129	12.27782224	11.53346848	10.07017573	2.538309092	32.29163619	233.0548743	213.1150688	210.5055473
ATIC	2874.248159	1956.862343	2410.920885	2052.602196	1909.509938	2399.717426	2266.290106	1949.378926	2256.97897
ATL1	42.899844	38.96772064	38.49817313	21.79231442	29.00800719	28.42595664	46.76405389	51.88752367	47.81474989
ATL2	944.2752923	743.5979507	750.1494524	776.8848403	587.0536722	1030.373094	736.0569684	588.9750749	748.995592
ATL3	1625.549157	1254.409657	1452.168723	1247.278264	1105.950019	1389.312963	1487.660756	1326.685987	1397.514442
ATM	611.8183617	571.5405412	592.8044316	626.3691644	589.5710383	621.4234926	767.9976294	525.0944113	759.8540235
ATMIN	942.0086607	685.0525431	773.1579249	693.3642842	587.0576927	805.8944847	776.7482342	700.5124494	769.2376864
ATN1	3327.167203	2279.346819	2513.019776	2509.676245	2199.677735	2702.829552	2539.863013	2343.683624	2668.723621
ATOH1	0	0	0.842149687	0	0	0	0.829427737	0	0
ATOH7	5.359160195	9.269913939	1.369587227	20.19248273	10.59172258	18.54184995	6.60261852	2.699504823	2.668162026
ATOH8	652.4252217	369.8641958	451.7762003	336.4447814	381.7419302	436.3943662	403.5894621	386.3087369	459.697899
ATOX1	4569.593928	3405.580626	3472.093433	3488.271323	2980.036	4178.212058	4071.471811	3456.251193	4120.879328
ATP10A	0	0	0	0.490378332	0.72932632	0.975136777	0.246685438	0.24780638	0.244084261
ATP10B	1.129909242	0.597639199	2.291713502	1.554997245	1.061053042	2.094024762	2.24626946	1.10662338	0.618472172
ATP10D	464.7681744	372.6868986	396.4416744	259.2565187	228.0983741	230.6943848	396.7215222	332.2743336	386.0428069
ATP11A	332.9292619	235.9071656	258.223107	141.6346536	146.9862615	195.8055102	252.0936786	266.4073561	237.5734305
ATP11A-AS1	0	0	0	0	0	0	0	0	0
ATP11AUN	0	0	0	0	0	0	0	0	0
ATP11B	940.6680527	696.1080952	773.3109761	840.7993072	730.3751984	815.9660819	818.2493015	808.0896923	816.0604897
ATP11C	776.7004714	601.1392496	719.5842833	545.4641648	448.9638381	545.5204884	657.7086984	631.8731074	652.6624256
ATP12A	0	0	0	0	0	0	0	0	0
ATP13A1	1403.840139	1002.523845	976.8578937	1100.988254	822.5982936	1085.964959	950.407318	956.8229696	1131.476542
ATP13A2	610.3448215	337.0848495	452.7722077	246.9832889	223.1317636	280.7272691	466.6383095	429.0066906	451.3237805
ATP13A3	2659.078755	2038.010933	2073.462134	5403.446187	4534.191047	5523.212866	2059.219034	1908.668007	2085.329004
ATP13A4	0.439645927	0.450977956	0.43721484	0.64672079	0.213814272	4.326027027	0.218172908	0	4.882007613
ATP13A4-AS1	0	0	0	0	0	0	0	0	0
ATP13A5	0	0	0	0	0	0	0	0	0
ATP13A5-AS1	0	0	0	0	0	0	0	0	0
ATP1A1	5783.464287	4154.529329	4659.484005	5139.414427	4535.484904	5715.864721	4605.541772	4444.679843	5083.941303
ATP1A1-AS1	38.97925763	13.03678881	33.72030719	30.34279521	30.47047592	36.00494623	45.59752832	73.71521899	68.59342672
ATP1A2	2.418742923	0.526219683	0.914939767	0	2.492198079	0.413256561	0.417557505	0	2.976377176
ATP1A3	22.17189517	12.00567222	24.61080294	15.6394101	7.82120024	8.659771106	21.02279912	19.79912237	22.75948038
ATP1A4	1.603501069	0.830192826	1.677658375	0.812852316	0	0	0	0	0.984101528
ATP1B1	1424.215543	950.3097157	1163.500957	780.2490423	709.4554719	845.2835552	1118.579911	1056.249037	1130.260688
ATP1B1P1	4.355129914	4.32313541	11.04030323	2.178337323	0	4.342249734	6.587257807	6.54468074	4.3696053
ATP1B2	2.698383905	3.379736424	5.558301777	1.718944858	2.913693631	2.461514138	3.354728997	4.526672549	4.287661767
ATP1B3	6052.234567	4274.087295	4750.501134	4338.752301	3685.369011	4621.592609	5214.179873	4657.275121	5354.585585
ATP1B3-AS1	0	9.008951407	0	0	0	0	0	0	0
ATP1B3P1	0	0	0	0	0	0	0	0	0
ATP1B4	0.881843049	1.459268637	0.849929141	0	0	1.249514574	0.872590072	1.298580825	1.352390691
ATP23	439.6160933	242.3200413	331.188415	156.6384423	175.0716395	245.200245	329.7088238	344.3884563	316.8814712
ATP2A1	129.2891282	34.68972168	65.85028513	43.19936095	101.5754536	81.27570559	130.1055968	39.18996574	38.89322164
ATP2A1-AS1	512.3445688	378.4884781	351.207632	121.9014862	184.4796265	259.8806964	447.8841735	413.1335622	404.856639
ATP2A2	4555.753515	3108.91248	3635.922938	5159.917102	4570.256833	5555.220182	3438.859979	3086.990972	3682.708559
ATP2A3	0.771691455	6.701108974	1.073469874	0	0.386764646	0	0.780451182	0	0.511623178
ATP2B1	4437.18805	3297.733034	3637.386139	20352.97611	17239.67369	22007.3331	3824.608468	3274.535676	3798.409361
ATP2B1-AS1	102.7500374	77.22339343	89.5259407	301.0336386	247.049501	346.3128006	82.99129322	82.98181394	88.77004695
ATP2B2	5.136185756	0	0	0.414198318	0	0	0.421365946	0	0
ATP2B2-IT1	0	0	0	0	0	0	0	0	0
ATP2B2-IT2	0	0	0	0	0	0	0	0	0
ATP2B3	0	0.376766937	0	0	0	0	0.248462711	0	0
ATP2B4	1904.097687	1342.299982	1559.459974	1328.463087	1152.198366	1353.322099	1820.669213	1516.103538	1667.981457
ATP2C1	2871.569794	2041.576476	2338.342984	2299.996138	2128.616437	2620.690466	2599.34655	2425.755845	2540.369233
ATP2C2	0	0	0	0	0	0	0	0	0
ATP2C2-AS1	76.32313926	45.69146226	50.17224102	57.71644545	45.38361822	43.40942905	62.48920959	52.6296164	65.4475742
ATP4A	0	0	0	0	0	0	0	0	0
ATP4B	0	0	0	0	0	0	0	0	0
ATP5F1A	11434.47791	8071.90573	9155.887989	8041.438018	7406.833337	8939.810318	9592.789373	8890.482785	10308.44537
ATP5F1AP1	0	0	0	0	0	0	0	0	0
ATP5F1AP10	0	0	1.117845971	0	0	0	0	1.113488145	0
ATP5F1AP2	0	0	0	0	0	0	0	0	0
ATP5F1AP3	0	0	0	1.179441336	0	0	1.188969986	0	0
ATP5F1AP4	0	0	0	0	0	0	0	0	0
ATP5F1AP7	0	0	0	0	0	0	0	0	0
ATP5F1AP8	0	0	0	0	0	0	0	0	0
ATP5F1B	19412.66722	13912.32918	15236.28569	15046.91522	13256.35636	16737.86255	15598.91042	14545.21931	17195.71494
ATP5F1BP1	0	0	0	0	0	0	0	0	0
ATP5F1C	7250.746162	4839.909315	5866.971849	5767.094401	4867.624399	6129.795088	6058.999552	5437.522839	6136.405875
ATP5F1CP1	0	0	0	0	0	0	0	0	0
ATP5F1D	4957.759292	3146.917004	3467.018596	3182.399445	2734.642157	3451.558512	3819.579802	3534.948626	4037.94229
ATP5F1E	2435.628893	1615.67231	1730.304957	1647.658478	1601.05038	1826.06865	1835.064741	1772.351996	2124.364002
ATP5F1EP1	0	0	0	0	0	0	0	0	0
ATP5F1EP2	0	0	0	0	0	0	0	0	0
ATP5IF1	9144.659028	6822.549917	7137.72063	5975.596095	5177.254291	6248.259322	7886.172364	7354.277982	8382.155197
ATP5MC1	6470.150946	4809.888209	4985.170875	4649.452965	4343.189369	5101.65639	4412.232122	4286.526735	5433.829307
ATP5MC1P1	0	0	0	0	0	0	8.854016681	0	0
ATP5MC1P3	0	0	0	0	0	0	0	0	0
ATP5MC1P4	0	0	0	0	0	0	0	0	0
ATP5MC1P5	0	0	0	0	0	0	0	0	0
ATP5MC1P6	0	0	0	0	0	0	0	0	0
ATP5MC1P7	0	0	0	0	0	0	0	0	0
ATP5MC1P8	0	0	0	0	0	0	0	0	0
ATP5MC2	8903.491207	6603.292474	6883.693353	6136.394685	5439.7431	6887.372944	7126.563741	6857.623337	8032.512728
ATP5MC2P1	0	0	0	0	0	0	0	0	0
ATP5MC2P3	0	0	0	0	0	0	0	0	0
ATP5MC2P4	0	0	0	0	0	0	0	0	0
ATP5MC3	6238.350482	4605.55285	4953.872706	4707.861505	4277.263022	5197.331551	5138.803202	4739.483125	5983.007931
ATP5MD	10994.51906	8403.835469	9141.040521	9689.623898	8146.116956	10018.09915	9326.352521	9228.069841	10174.22388
ATP5MDP1	0	0	0	52.88354937	0	0	0	0	0
ATP5ME	12398.52362	8085.421627	9044.862696	8569.403749	7808.056921	9556.810814	9628.042109	8444.01532	11371.59197
ATP5MF	15670.53699	11211.75993	11795.58046	11430.93382	10689.88527	13206.05701	13157.97088	12176.62329	13314.87876
ATP5MF-PTCD1	271.5759644	227.5918811	190.8099105	188.3244466	154.7530371	234.1787463	187.6271771	161.4979005	206.580452
ATP5MFP1	0	0	0	0	0	0	0	0	0
ATP5MFP3	0	0	0	0	0	0	0	0	0
ATP5MFP4	18.2462064	0	0	0	18.27349947	0	0	0	0
ATP5MFP5	0	0	0	0	0	0	0	0	0
ATP5MFP6	0	0	0	0	0	0	0	0	0
ATP5MG	6245.777971	3904.053226	4369.614171	4193.845298	3966.271946	4211.96478	4295.638875	4568.821228	5261.825587
ATP5MGL	0	0	0	4.995738894	2.581012888	0	2.658038134	0	0
ATP5MGP2	0	0	0	0	0	0	0	0	0
ATP5MGP3	0	0	0	0	0	0	0	0	0
ATP5MGP4	0	0	0	0	0	0	0	0	0
ATP5MGP5	0	0	0	0	0	0	0	0	0
ATP5MGP6	0	0	0	0	0	0	0	0	0
ATP5MGP7	0	0	0	0	0	0	0	0	0
ATP5MPL	4464.233237	3149.4679	3639.183265	2980.743727	3094.246462	3417.787005	3631.986799	3378.142199	3941.449911
ATP5PB	10407.68794	7354.643844	8231.07441	7719.456802	6999.387515	8415.918078	8394.565028	7931.592544	8951.705118
ATP5PBP1	0	0	0	0	0	0	0	0	0
ATP5PBP2	0	0	0	0	0	0	0	0	0
ATP5PBP3	0	0	0	0	0	0	0	0	0
ATP5PBP4	0	0	0	0	0	0	0	0	0
ATP5PBP5	5.692346257	8.476912515	2.852545774	5.641971516	0	2.814358015	11.38627469	14.24617909	8.511058311
ATP5PBP6	0	0	0	0	0	0	0	0	0
ATP5PBP7	2.855147332	0	0	0	0	0	0	0	0
ATP5PD	10640.25283	8370.160072	8788.143205	8303.533905	7841.577106	9288.776123	9570.832338	8766.550018	9753.411707
ATP5PDP1	0	0	0	0	0	0	0	0	0
ATP5PDP2	0	0	0	0	0	0	0	0	0
ATP5PDP3	0	0	0	0	0	0	0	0	0
ATP5PDP4	0	0	0	0	0	0	0	0	0
ATP5PF	6057.205675	4239.008696	4927.059369	4776.855805	3856.155915	4938.749939	5163.810418	4749.343766	4851.369088
ATP5PFP1	0	0	0	0	0	0	0	0	0
ATP5PO	6958.65895	5114.423174	5775.123196	5146.612809	4693.471958	5662.776532	6037.798416	5487.724982	6401.081659
ATP6AP1	4333.458563	3033.902018	3254.104812	3155.689113	2838.743449	3631.099013	3639.252112	3414.998633	4011.984836
ATP6AP1L	35.48243974	26.5718608	49.47439073	21.53898055	17.42485238	13.75189857	41.61080118	53.38322797	46.07169005
ATP6AP2	3973.030301	2674.784849	3392.100977	3518.470417	3130.323537	3897.096289	3502.127075	3063.289056	3696.812492
ATP6V0A1	983.3129273	657.4561364	719.2771609	657.6501428	559.1821993	684.0242995	747.3841615	734.0144338	881.312904
ATP6V0A2	642.5653334	461.5349886	536.6329028	612.9887679	596.6062615	607.4880183	455.6192447	429.986025	433.409151
ATP6V0A4	3.689778268	1.84127501	4.371128532	11.16136129	0.602668679	5.517607386	3.077931483	2.248524671	1.220233236
ATP6V0B	5281.283799	3803.202728	4189.932866	4792.739017	4218.27084	5553.521136	3970.691313	3630.099015	4237.143149
ATP6V0C	11622.29371	8342.544361	8476.54794	9009.958347	7864.109696	10203.30112	9637.892414	8913.609038	10506.76935
ATP6V0CP1	0	0	0	0	0	0	0	0	0
ATP6V0CP2	0	0	0	0	0	0	0	0	0
ATP6V0CP3	0	0	6.060527243	0	0	0	0	0	0
ATP6V0CP4	6.339509384	0	6.579829561	0	0	19.43694344	13.29521781	6.468353862	0
ATP6V0D1	5110.089012	3879.527859	3825.154425	3872.400863	3383.217621	4347.788324	4117.885234	3919.295296	4380.203446
ATP6V0D2	0	0	0.779202514	0.755376871	0.696117305	0	2.319137637	1.545107333	0
ATP6V0E1	6717.17472	4752.820387	5416.203539	5401.176742	4872.336899	6188.946796	5205.19449	4986.403973	5665.628217
ATP6V0E1P1	0	0	0	0	0	0	0	0	0
ATP6V0E1P2	0	0	0	0	0	0	0	0	0
ATP6V0E1P3	0	22.45892552	0	0	0	0	0	0	0
ATP6V0E1P4	0	0	0	0	0	0	0	0	0
ATP6V0E2	2263.599085	1519.199317	1662.634849	1209.186638	1029.118167	1475.536059	1801.617841	1662.151878	1935.705675
ATP6V0E2-AS1	118.4355044	73.23124432	109.3449079	59.62603304	66.85597273	58.38076259	75.80778585	80.64902719	94.95541347
ATP6V1A	1077.867716	716.3476904	896.6237052	772.3907847	642.1209895	810.4289847	798.6831042	730.3982851	832.3245346
ATP6V1B1	52.70087474	28.84120197	29.62126983	21.44301685	26.80190183	2.061804664	19.75141446	16.92611352	9.418750853
ATP6V1B1-AS1	23.63964265	27.32024113	14.40119368	11.24694498	2.04651128	9.784151154	28.30903285	15.31543023	24.70401385
ATP6V1B2	2916.384355	1989.910425	2406.575965	3055.841548	2793.276763	3555.634529	2022.092824	1790.860077	2023.996688
ATP6V1C1	2107.336683	1242.376048	1620.48657	1765.773548	1544.251083	1794.530441	1395.741258	1337.385037	1498.43384
ATP6V1C2	11.48598996	8.40723232	1.128163235	1.660313225	0.551446838	1.104270651	0	1.131988105	2.832075958
ATP6V1D	3642.160994	2716.470205	3146.843209	3068.678099	2571.335459	3163.359391	3078.094509	2981.339656	3174.402911
ATP6V1E1	7087.657512	4972.764496	5797.529116	6157.813242	5542.086063	7042.319595	5496.675348	5244.181226	6113.327084
ATP6V1E1P1	0	0	0	0	0	0	0	0	0
ATP6V1E2	160.3024146	125.8744495	133.609454	107.0082035	58.21967514	94.08299761	111.4717313	145.6624236	155.1530133
ATP6V1F	6969.508402	5409.803943	5471.205991	5991.927343	4968.556638	6113.731144	5568.741264	5454.536775	6233.558907
ATP6V1FNB	20.40373698	16.1620261	18.26796214	17.86792603	8.757321965	15.62452281	23.40604551	18.24708046	20.70081704
ATP6V1G1	1895.419992	1334.620688	1404.993019	1223.892413	1146.700911	1529.034153	1327.484164	1241.957102	1518.969427
ATP6V1G1P2	0	0	0	31.28262278	20.47313112	10.39917763	0	20.73622096	0
ATP6V1G1P3	0	0	0	0	0	0	0	0	0
ATP6V1G1P4	0	0	0	11.1565053	0	22.26820011	0	0	0
ATP6V1G1P6	0	0	0	0	0	0	0	0	0
ATP6V1G1P7	0	0	0	0	0	0	0	0	0
ATP6V1G2	102.9702506	47.50898803	102.7635841	33.78741651	29.8055233	49.63759663	76.46542749	71.24597467	93.05870279
ATP6V1G2-DDX39B	47.83049349	43.06942549	38.88078948	48.30349899	33.26289531	38.25052374	51.11560431	31.75002657	58.96224061
ATP6V1G3	16.08930612	6.542959624	6.546790596	0	0	11.79717504	11.93243057	12.05620272	31.88248225
ATP6V1H	1901.973772	1365.145617	1554.552774	1452.173727	1212.909127	1621.106295	1490.101002	1441.944366	1566.633938
ATP7A	157.6757643	107.4849977	108.6177186	88.07542731	73.71536083	113.0317108	141.8804086	118.8782284	144.4071265
ATP7B	25.69323454	24.41823814	21.30183087	25.96091564	11.35462135	9.938435857	22.51024934	19.93951263	20.22189068
ATP8A1	23.60518651	0.228795835	0	1.081190957	0.871861597	0	0.890464356	0.224605801	11.85940539
ATP8A2	9.675782073	11.26783518	10.24077452	17.46564931	2.757711202	3.346947232	27.60337946	6.369035839	23.05694884
ATP8A2P2	0	0	0	0	0	0	0	0	0
ATP8A2P3	0	0	0	0	0	0	0	0	0
ATP8B1	1113.460187	791.4500359	904.5023242	398.1677047	348.1898756	403.7778534	833.1199699	711.9615277	823.7801078
ATP8B2	931.6223858	632.3576951	715.9089179	644.3216207	656.4494078	696.1189472	657.9859275	763.4305101	823.2476898
ATP8B3	279.8114618	177.4833172	191.353571	108.9818696	88.04364285	102.1497387	270.3402256	229.7484408	272.8438077
ATP8B4	26.31668656	13.61742131	14.90688195	13.34599342	13.30232332	26.29982444	11.64664513	5.194718895	3.445362851
ATP8B5P	0.733723671	0	0	0	0	0	0.586474571	1.048400865	0
ATP9A	271.3683271	170.7830242	204.2749132	138.2980974	111.2758935	146.9534192	223.2007355	192.3953232	243.0684295
ATP9B	487.1724684	377.1939296	444.0933721	337.5953951	337.8610994	370.7733475	399.9169314	396.6798376	479.4737482
ATPAF1	1561.510261	1135.52485	1268.265	990.0469263	866.237916	1167.535969	1296.505007	1224.033503	1339.778614
ATPAF2	753.3451219	555.6082773	513.5646614	469.4669568	349.9706694	481.4281783	714.3173445	513.2307943	671.6453301
ATPSCKMT	578.1404272	439.4989757	435.8154631	344.1730833	273.0860281	408.5603975	416.5381372	416.0652823	551.7068111
ATR	493.1290284	348.0969831	439.5715404	379.1489851	335.3788958	426.8794669	356.2032613	361.4225212	312.0569852
ATRAID	3589.964866	2578.965755	2858.508347	2432.949892	2380.374395	2877.001857	3147.427234	2862.100341	3186.566771
ATRIP	397.4182781	286.3874503	282.2076639	253.2402503	234.4052477	275.4059959	320.5922277	294.8040497	308.265955
ATRN	701.3738889	494.0551975	564.0282525	555.3961631	482.7724334	607.5854391	632.1049029	589.4823229	663.3687915
ATRNL1	152.3404653	127.7431242	152.5601581	76.10881885	61.32653531	69.39595246	149.4313037	131.9034799	106.559558
ATRX	919.4484436	546.0435163	868.2324193	722.6855221	587.9167886	723.5975935	855.7750923	850.4683762	792.1347782
ATXN1	312.5399617	285.7554971	256.7636766	242.8985757	201.3016058	308.6498994	342.4041105	240.6303731	356.8826769
ATXN10	4570.609273	3231.537106	3195.044497	3418.052748	2996.138375	3755.338051	3557.42968	3223.303888	3952.162
ATXN1L	364.4837018	267.6186548	280.5764925	270.6816967	239.6534534	243.1618731	339.0731716	238.646712	340.8493634
ATXN2	1558.890034	1017.548077	1111.901779	1231.164251	924.5310508	1222.760176	1181.410534	946.7815637	1078.011342
ATXN2-AS	37.56700614	21.89710344	0	11.04409803	5.425948865	21.98754165	28.00169164	10.9751535	21.08221717
ATXN2L	3998.570854	2774.210693	3187.214689	3694.140888	3043.280208	3936.623788	3300.751476	2904.776584	3394.9168
ATXN3	590.5987226	506.5419959	528.7982804	446.7317573	504.7334511	566.857432	584.2506192	507.7078698	608.3226457
ATXN3L	0	0	0	0	0	0	0	0	0
ATXN7	401.1622918	270.3855706	284.7000067	432.1082777	323.5698198	466.7907903	356.2219988	343.8432776	370.8706528
ATXN7L1	286.227357	141.8388587	208.6990986	147.5428826	152.1109214	178.9305715	137.2543458	153.1723834	230.8893637
ATXN7L2	273.6492755	163.2268136	190.914269	105.1315031	90.27948186	122.7972734	167.5414069	194.4957086	174.285646
ATXN7L3	1643.648714	954.9529291	1109.695521	1098.08568	1040.914227	1397.61713	1272.833031	1133.306629	1270.248371
ATXN7L3B	626.8445098	485.4722509	486.3680436	430.2081966	367.944311	457.3570327	547.0906926	478.5831621	544.0536882
ATXN8OS	0	0	0	0	0	0	0	0	0
AUH	252.0513992	180.4384661	197.9574505	105.9801458	113.6966081	156.1720288	227.9764956	222.9280757	229.2931037
AUNIP	256.2186411	190.6358245	228.7270675	203.9103637	135.3196525	213.3645063	257.8287596	206.5536101	204.2011342
AUP1	3109.631341	2143.90705	2412.033039	2681.437255	2128.287777	2878.609877	2425.207501	2229.089102	2639.385472
AURKA	3758.20903	2744.09953	3007.810858	3388.985435	2744.607633	3522.819992	3016.871353	2800.733112	3271.498959
AURKAIP1	5973.539477	4473.522623	4943.874423	4326.318156	3712.001233	5012.39655	4947.252645	4348.630751	4863.734958
AURKAP1	2.222180855	0	0	3.073895698	5.641603035	1.532820493	1.546988858	1.554880896	0
AURKAP2	0	0	0	0	0	0	0	0	0
AURKB	3670.998592	2457.934992	2642.735969	2916.281689	2489.218716	2978.087403	2765.369633	2482.960444	2883.533327
AURKC	15.65014042	13.37168321	34.14471439	17.83573259	16.87304211	8.513118962	26.23736773	15.93891378	26.96224328
AUTS2	7.351943602	3.10002788	0	1.749905032	3.013252534	5.197434238	2.193611412	6.4240005	0.54910227
AVEN	789.7353068	584.8659499	543.0431497	633.5557274	533.3205306	654.8423253	654.2666291	579.864601	704.8709877
AVIL	84.21674657	45.47718224	52.2032242	50.51174307	40.0897104	38.91821769	82.85698219	44.97463556	70.36998937
AVL9	873.0877385	699.4460235	685.7549214	638.4302463	544.4599975	645.3367484	673.7438104	593.2725341	606.7167405
AVP	0	0	0	0	0	0	0	0	0
AVPI1	1081.61281	737.8370627	796.772507	314.1533016	269.0469305	357.0946483	720.7380211	724.980473	952.510523
AVPR1A	0.682159519	0.691133058	0	0.649803961	1.005447248	0.650175678	1.017996361	0	0
AVPR1B	0	0.317995074	0	0	0	0	0	0	0
AVPR2	2.931593139	1.450829711	0	1.471777324	0	0	2.201939204	2.196422269	0
AWAT1	0	0	0	0	0	0	0	0	0
AWAT2	2.398363378	0.800989416	0	0	3.766633812	0	4.011228109	0	1.918714536
AXDND1	15.09196898	4.56715567	4.605508322	3.357136331	12.88723334	0.906528245	1.852882863	14.8583765	0.519683198
AXIN1	597.0102056	406.1915845	458.9396787	397.3524629	352.9868294	419.8178577	412.9725221	429.4609053	555.3342498
AXIN2	24.29457942	22.84750266	17.73570987	5.389485512	10.40096382	15.58461383	31.42202738	18.01060676	28.04706818
AXL	12692.03058	9316.280194	10042.09327	8073.413532	6987.152196	8672.981741	10513.079	9720.41595	11167.89942
AZGP1	0	0	0	0	0	0	0	2.67481494	0
AZGP1P1	0	0	0	0	0	0	0	0	0
AZGP1P2	0	0	0	0	0	0	0	0	0
AZI2	2009.261275	1551.337498	1588.399094	2359.022648	2297.120051	2383.669338	1863.815959	1798.126582	1868.805363
AZIN1	2797.740913	2048.082115	2301.789888	2347.010563	1933.434058	2517.038184	2267.842782	2107.164245	2425.173686
AZIN1-AS1	117.8749318	35.90975856	21.69400552	113.7488116	49.22991278	72.89619864	66.24098129	86.23063958	68.42446184
AZIN2	20.28635199	22.22063858	41.59783518	10.556289	7.429869923	30.92819653	15.96826121	19.73540804	37.55198065
AZU1	11.78610053	7.566238527	6.620719133	8.952012411	2.189023842	9.214948189	12.90904187	3.315076441	8.654580394
AZU1P1	0	0	0	0	0	0	0	0	0
B2M	103147.5225	72347.39937	80424.95584	114228.1338	109988.8654	133698.1588	86220.39423	85734.09591	96503.46304
B3GALNT1	698.3408483	522.7239705	602.3727102	533.9215952	480.8027435	737.9852475	572.2448381	575.6185228	525.7752563
B3GALNT1P1	0	0	0	0	0	0	0	0	0
B3GALNT2	391.9470754	266.4688994	310.5733819	263.9848183	287.200246	329.8208981	305.6573744	252.6036401	319.6901999
B3GALNT2P1	0	0	0	2.892245545	0	0	0	0	0
B3GALT1	29.3180924	20.36274339	23.14383023	20.29494678	14.8373885	20.4616496	21.57743512	23.28998333	17.11045444
B3GALT2	72.22586012	53.6265012	66.3013512	47.88043656	50.62857568	58.64905688	43.91884356	45.01475371	39.00917846
B3GALT4	36.63050749	17.84665488	19.11504514	8.527331312	15.78121053	14.75491813	38.11218927	30.8764096	35.86614694
B3GALT5	0.365751316	0.243161336	1.22054426	0.715347036	0.238505244	0.11981145	2.885198963	0.366369015	0.484622113
B3GALT5-AS1	0	0	0	0	0	0	0	0	0
B3GALT6	1111.959034	718.1071959	751.8475081	873.6159873	749.829685	999.2049369	787.1007202	720.1909148	836.2841804
B3GAT1	0	0	0	0	0	0.554529301	0	0	0
B3GAT2	0	0	0.369192047	0	0.362959551	1.075289461	0	0	0.759737449
B3GAT3	2099.878969	1564.572956	1604.567932	1218.453468	977.9718304	1221.602787	1681.162632	1565.199662	1966.798571
B3GAT3P1	4.978641963	0	5.253503692	0	0	0	5.121921931	0	9.847140896
B3GLCT	377.0812624	274.5848277	349.7059838	220.2069774	200.9089807	248.6617932	316.3066141	280.6252616	335.8937141
B3GNT10	91.10635362	85.91611056	140.6790808	76.65495119	94.93410477	77.14815324	71.97806805	98.19078213	116.6092472
B3GNT2	308.228142	244.8827479	274.9149469	362.1720441	303.567339	423.3669974	225.2240842	214.5576468	232.0399315
B3GNT2P1	0	0	0	0	0	0	0	0	0
B3GNT3	0	0	0	0	0	0	0	0.764525382	0
B3GNT4	6.623412363	3.348299812	14.07329441	5.879940923	1.193094088	12.24862256	6.171934588	27.40679451	7.678512019
B3GNT5	192.9537483	142.2571117	166.621475	168.2277991	143.5336368	208.0159981	135.6669113	119.9516914	155.2062094
B3GNT6	5.308796605	1.183618508	0.748748795	1.416896882	1.424535034	0.794208531	0	0	1.198256249
B3GNT7	3.220688549	1.84127501	0.950469106	2.319006995	2.75628017	1.844431656	0.464172826	10.86666694	0.457916581
B3GNT8	17.08973472	9.485890336	18.13858127	4.852628378	2.872171004	11.4914784	12.44987079	13.54415798	7.567740482
B3GNT9	1263.092094	976.7608547	992.0413495	846.473061	809.1160464	899.7918787	1075.545844	1079.267688	1162.520272
B3GNTL1	255.3356575	182.9821905	198.7275216	145.7576496	92.13455293	137.8932909	217.2036846	168.7233332	187.8799438
B3GNTL1P1	0	0	0	0	0	0	0	0	0
B3GNTL1P2	0	0	0	0	0	0	0	0	0
B4GALNT1	1475.977128	1130.357135	1046.933632	922.5121488	836.1266971	1065.989738	1222.33998	1136.756185	1245.91622
B4GALNT2	4.280454937	2.042821486	3.139768933	2.211969579	2.504486777	1.841305405	3.138511089	1.589483966	2.977613046
B4GALNT2P1	0	0	0	0	0	0	0	0	0
B4GALNT3	0	0	0	0	0	0.880870457	0.891810005	0.315779188	0
B4GALNT4	52.21884896	63.54840275	66.02306967	13.41549324	8.351317896	11.43013629	64.69300224	97.08462416	75.88231739
B4GALT1	2514.160406	1889.67191	2085.14014	4618.005521	4123.364629	5014.095343	2177.88293	2019.712887	2265.006884
B4GALT1-AS1	47.2523627	40.86471834	28.63989637	28.12340033	22.96371645	15.50361295	18.39197864	31.39236068	31.46408663
B4GALT2	3728.651426	2682.683448	3021.949567	2875.720058	2368.685639	3254.635213	3225.634846	2916.771678	3450.042364
B4GALT3	790.2108195	741.2946606	696.9328119	728.4100969	674.5786002	678.9333831	657.4889767	640.4498982	658.583934
B4GALT4	1255.693899	958.3799278	1148.9659	957.4633596	807.2665859	1049.271449	1250.605977	1078.49667	1231.290535
B4GALT4-AS1	0	0	0	0	0	0	0	0	0
B4GALT5	767.4121708	529.4911093	576.9597933	1050.39383	877.977871	1158.689158	525.1399541	510.4107256	520.3446032
B4GALT6	132.8185713	103.2971858	117.8284269	79.85207095	74.08524839	70.79164038	100.8826903	91.15698107	117.096959
B4GALT7	885.6425291	555.0535413	631.3591244	736.8239418	613.9930894	728.5891176	753.4241209	686.3188614	855.0039253
B4GAT1	715.4386868	509.977047	641.1435437	359.3082151	287.9651891	355.4177104	655.0898872	682.9258059	649.781291
B9D1	1001.694077	699.926484	776.269849	603.0043557	486.3271383	651.8162553	761.0593602	746.0268417	872.2377249
B9D2	198.1022698	128.1384654	148.4621881	119.1647353	100.0343009	144.7463425	181.5903406	97.56003822	225.2222565
BAALC	48.23841456	12.59540932	20.91167225	8.74518303	16.31509884	13.38455002	40.38105549	13.98627211	19.7257696
BAALC-AS1	215.0983607	77.99006884	139.0823003	119.1729828	91.38637334	125.0832387	139.0268959	93.12916986	146.5632086
BAALC-AS2	0	0	14.14722294	0	0	0	0	14.13808813	6.720256287
BAAT	0.874339535	4.47621711	0.872081613	1.908816799	0.845694165	0	1.770493583	0	5.548007034
BABAM1	3913.069266	2801.11236	2981.549886	2774.980943	2542.358843	3028.379597	3261.125964	2992.740262	3410.856886
BABAM2	854.5283655	625.1573151	686.4763473	590.7146823	546.5331305	650.4204829	720.6882321	645.9732416	811.1589231
BACE1	2086.710151	1495.424671	1682.878745	1271.841527	1186.559612	1442.713298	1731.64804	1695.563457	1921.089985
BACE1-AS	59.62895981	40.3542599	84.6350355	34.05701412	38.29054042	40.93397352	89.52784798	62.84031433	75.66174152
BACE2	1234.290303	874.4914787	949.0213683	1145.772365	939.3951291	1211.893046	1056.917844	941.3859748	1088.392244
BACE2-IT1	0	0	0	0	0	0	0	0	0
BACH1	510.519534	317.8971569	397.4957905	444.0554365	397.1986146	476.264147	551.9538944	444.8098915	552.6671356
BACH1-AS1	17.7506743	18.74459532	11.85645816	28.35900597	3.888634923	3.051417953	14.70233532	8.355442842	19.61779221
BACH1-IT1	30.75228417	10.26630853	7.738849718	20.33286978	19.99664307	30.41915277	10.31361451	12.83192116	20.39859317
BACH1-IT2	32.05075236	6.466150361	6.008774895	41.36487426	21.61761556	23.41080254	6.39046295	44.61371182	20.26090117
BACH1-IT3	14.98049677	0	7.732730513	0	0	7.606759703	0	15.15258404	0
BACH2	0.423528378	0	0	0	0	0	0.425758348	0	0
BAD	3344.714562	2377.294971	2662.515659	2250.000183	2055.239141	2558.560202	2682.71724	2598.209143	3030.002206
BAG1	1368.874782	1050.92036	1159.688716	1861.467054	1881.757036	2591.714374	1221.336405	1153.957308	1248.604693
BAG2	546.5957118	397.6470962	417.4691609	218.6972513	183.6136707	249.6033299	422.8539293	357.1594556	394.1887463
BAG3	2368.43537	1708.939284	1891.939754	1854.673338	1685.890965	2033.115088	1958.533392	1778.596186	2105.173794
BAG4	511.3737941	343.0521584	415.241794	314.2747272	288.7735175	351.0131047	389.1124596	323.7949294	367.9016103
BAG5	528.7944038	425.6447706	516.4924639	486.9486386	397.275595	462.0188078	506.6697501	399.350045	462.8395872
BAG6	6517.481105	4641.130613	5509.353828	4946.968064	4121.951065	5261.137823	4817.218876	4735.924012	5757.676301
BAGE2	9.70822727	9.855334947	5.206850682	7.326179315	2.893159465	3.746797528	8.592325985	7.699264394	11.07403708
BAHCC1	472.6574296	254.955004	395.650945	485.8888757	480.3234161	508.6337142	290.2162522	290.6412097	303.3068936
BAHD1	342.1161149	232.5750565	235.0191046	203.2883083	177.9312719	247.0679123	264.537202	227.5975121	252.8025689
BAIAP2	1213.70102	817.2842958	908.5816046	360.0689618	346.478839	387.4667946	1014.586231	912.0020582	1044.030917
BAIAP2-DT	198.4492623	162.4177503	162.2192049	79.67034372	59.21921655	76.16234215	166.9763865	160.8280158	197.1586921
BAIAP2L1	272.6970195	179.9337839	274.1395393	88.57726476	65.94583672	135.0019032	270.863937	210.4852122	261.397532
BAIAP2L2	1424.045754	929.9698841	1002.134528	1103.877622	931.5447858	1028.756541	1088.599658	1088.202517	1280.623255
BAIAP3	2.792538006	3.495497883	4.719757204	1.766271531	4.596768349	3.113830312	14.73348837	31.12463485	23.21320575
BAK1	790.8859258	569.8956377	685.8874094	845.665296	803.294247	1034.094234	579.5207636	543.8966534	615.621692
BAK1P1	6.994115998	0	3.619652185	3.570954233	0	0	0	0	0
BAK1P2	0	0	0	0	0	0	0	0	0
BAMBI	48.38545343	22.23655014	24.9614002	16.91532899	19.17143764	20.26861066	31.74351061	31.82409622	25.24261123
BANCR	0	0	0	0	0	0	0	0	0
BANF1	10692.1596	7835.179881	8313.847998	7368.081637	6502.258065	8446.561476	8866.524517	8649.818204	9618.114041
BANF1P1	0	0	0	0	0	0	0	0	0
BANF1P2	0	0	19.08032221	0	0	0	0	0	0
BANF1P3	0	0	0	40.04054958	0	20.09542763	0	0	0
BANF1P4	0	0	0	0	0	0	0	0	0
BANF1P5	0	0	0	0	0	0	0	0	0
BANF2	0	0	0	9.605644643	0	0	0	0	0
BANK1	17.53148163	16.05843989	16.94706766	11.62627777	13.24199285	15.93652828	14.45844274	26.86538562	10.24071165
BANP	499.1970906	378.3465839	367.6431768	468.867871	409.6425007	489.0193349	396.7053744	387.4547338	525.7207437
BAP1	1752.22415	1246.128665	1352.927145	1306.432624	1077.887447	1459.392607	1265.546036	1254.011373	1510.108456
BARD1	360.6133289	366.1048365	275.9999199	239.1574047	234.9568308	333.9053871	380.3855941	279.0877172	298.5394457
BARHL1	0	0	0	0	0	0	0	1.74739683	0
BARHL2	0	0	0	0	0	0	0	0	0
BARX1	0	0	0	0	0	4.319943512	1.431389969	0	2.849593068
BARX1-DT	0	0	0	0	0	0	0	1.238915546	0
BARX2	2.377203466	2.367022285	0.804224845	2.368414809	1.567751754	0.851213321	2.022688566	0	1.569903754
BASP1	6077.119163	4568.057433	4791.728236	9236.478066	8356.793885	10605.63107	5161.213518	4839.86023	5159.436444
BASP1-AS1	2.32575937	1.262188565	1.176286752	2.873823599	2.281086866	8.023564982	2.910944026	4.063521984	2.311694225
BASP1P1	0	0	0	0	0	0	0	0	0
BATF	0	0	0	0	0	0	0	0	0
BATF2	123.0803	102.9486345	92.79608666	977.1500738	1075.11279	1279.430119	110.4060533	117.9828303	109.2883045
BATF3	137.2900658	143.2294349	166.3345839	412.5676287	530.3413729	532.2269658	197.2059909	132.7650195	167.10347
BAX	5457.065964	3849.8051	4343.544056	4339.673758	3381.825863	4312.958088	4407.68822	3647.438574	4860.434971
BAZ1A	808.156015	560.6175855	614.5789592	1096.375162	1012.370079	1266.504874	548.5184265	615.1116319	567.3614648
BAZ1B	1755.586865	1308.309253	1441.70946	1262.701775	1120.251384	1390.243262	1432.274823	1267.879944	1455.20105
BAZ2A	1520.563612	1126.862389	1138.660423	1609.258304	1320.349401	1618.44118	1095.098001	1094.733933	1267.060687
BAZ2B	355.5178422	227.8895626	244.894482	190.8291376	138.3660232	243.7709851	298.1483722	193.3798236	226.1558485
BBC3	183.99068	153.1503487	181.6731781	275.776354	290.5107669	318.652184	191.0385503	185.9095631	213.1977819
[truncated: 35,269 more rows]
