# Supplementary material for: Inflammatory Cytokine-Induced HIF-1 Activation Promotes Epithelial–Mesenchymal Transition in Endometrial Epithelial Cells
Source: Biomedicines. 2023 Jan 14;11(1):210. doi: 10.3390/biomedicines11010210 (PMC9855875; doi:10.3390/biomedicines11010210)
Supplement: Supplementary file 1 [file biomedicines-11-00210-s001.zip › Table_S2.csv]

Category	CategoryID	GO	Description	PARENT_GO	LogP	Enrichment	Z-score	#TotalGeneInLibrary	#GeneInGO	#GeneInHitList	#GeneInGOAndHitList	%InGO	STDV %InGO	GeneID	Hits	Log(q-value)	GeneList
Reactome Gene Sets	6	R-HSA-1280215	Cytokine Signaling in Immune system		-51	4.1	20	30211	715	1550	151	9.7	0.75	103|329|330|684|834|960|1052|1326|1435|1437|1440|1846|1901|2247|2308|2323|2537|2633|2634|2635|2919|2920|3091|3106|3133|3134|3383|3430|3433|3434|3437|3455|3460|3552|3553|3569|3574|3575|3576|3589|3592|3594|3598|3601|3604|3627|3656|3659|3660|3663|3665|3669|3718|3726|3911|3936|3965|3976|4050|4067|4312|4314|4318|4502|4582|4599|4600|4615|4790|4791|4792|4793|4938|4939|4940|4982|5055|5293|5371|5606|5610|…	ADAR|BIRC2|BIRC3|BST2|CASP1|CD44|CEBPD|MAP3K8|CSF1|CSF2|CSF3|DUSP4|S1PR1|FGF2|FOXO1|FLT3LG|IFI6|GBP1|GBP2|GBP3|CXCL1|CXCL2|HIF1A|HLA-B|HLA-E|HLA-F|ICAM1|IFI35|IFIT2|IFIT1|IFIT3|IFNAR2|IFNGR2|IL1A|IL1B|IL6|IL7|IL7R|CXCL8|IL11|IL12A|IL12RB1|IL13RA2|IL15RA|TNFRSF9|CXCL10|IRAK2|IRF1|IRF2|IRF5|IRF7|ISG20|JAK3|JUNB|LAMA5|LCP1|LGALS9|LIF|LTB|LYN|MMP1|MMP3|MMP9|MT2A|MUC1|MX1|MX2|MYD88|NFKB1|NFKB2|NFKBIA|…	-47	MyList
GO Biological Processes	19	GO:0034097	response to cytokine	19_GO:0050896 response to stimulus	-49	3.9	19	30211	799	1550	158	10	0.77	15|103|329|330|445|634|684|834|960|961|972|1051|1116|1435|1437|1440|1594|1906|2069|2207|2633|2634|2635|2643|2852|2919|2920|2921|3037|3091|3099|3309|3383|3428|3433|3434|3437|3455|3460|3552|3553|3569|3574|3575|3576|3594|3598|3601|3627|3656|3659|3663|3665|3718|3815|3875|3899|3965|4015|4155|4217|4501|4502|4599|4600|4615|4654|4790|4792|4824|4938|4939|5021|5277|5359|5371|5610|5743|5916|5971|6347|6348|6…	AANAT|ADAR|BIRC2|BIRC3|ASS1|CEACAM1|BST2|CASP1|CD44|CD47|CD74|CEBPB|CHI3L1|CSF1|CSF2|CSF3|CYP27B1|EDN1|EREG|FCER1G|GBP1|GBP2|GBP3|GCH1|GPER1|CXCL1|CXCL2|CXCL3|HAS2|HIF1A|HK2|HSPA5|ICAM1|IFI16|IFIT2|IFIT1|IFIT3|IFNAR2|IFNGR2|IL1A|IL1B|IL6|IL7|IL7R|CXCL8|IL12RB1|IL13RA2|IL15RA|CXCL10|IRAK2|IRF1|IRF5|IRF7|JAK3|KIT|KRT18|AFF3|LGALS9|LOX|MBP|MAP3K5|MT1X|MT2A|MX1|MX2|MYD88|MYOD1|NFKB1|NFKBIA|NKX3-1|OAS…	-45	MyList
GO Biological Processes	19	GO:0071345	cellular response to cytokine stimulus	19_GO:0050896 response to stimulus	-41	3.7	17	30211	703	1550	135	8.7	0.72	329|330|445|634|834|960|961|972|1051|1116|1435|1437|1440|1906|2069|2207|2633|2634|2635|2852|2919|2920|2921|3037|3091|3099|3309|3383|3428|3433|3434|3437|3455|3460|3552|3553|3569|3574|3575|3576|3594|3598|3601|3627|3656|3659|3663|3665|3718|3815|3875|3965|4015|4217|4501|4502|4599|4615|4654|4790|4792|4824|4938|4939|5277|5371|5916|6347|6348|6351|6352|6354|6355|6364|6372|6373|6374|6662|6672|6751|6772|67…	BIRC2|BIRC3|ASS1|CEACAM1|CASP1|CD44|CD47|CD74|CEBPB|CHI3L1|CSF1|CSF2|CSF3|EDN1|EREG|FCER1G|GBP1|GBP2|GBP3|GPER1|CXCL1|CXCL2|CXCL3|HAS2|HIF1A|HK2|HSPA5|ICAM1|IFI16|IFIT2|IFIT1|IFIT3|IFNAR2|IFNGR2|IL1A|IL1B|IL6|IL7|IL7R|CXCL8|IL12RB1|IL13RA2|IL15RA|CXCL10|IRAK2|IRF1|IRF5|IRF7|JAK3|KIT|KRT18|LGALS9|LOX|MAP3K5|MT1X|MT2A|MX1|MYD88|MYOD1|NFKB1|NFKBIA|NKX3-1|OAS1|OAS2|PIGA|PML|RARG|CCL2|CCL3|CCL4|CCL5|C…	-37	MyList
GO Biological Processes	19	GO:0009615	response to virus	19_GO:0044419 biological process involved in interspecies interaction between organisms	-36	5	17	30211	342	1550	87	5.6	0.58	103|661|684|1129|2537|2633|2635|3091|3428|3433|3434|3437|3455|3460|3569|3592|3627|3659|3660|3663|3665|3669|3696|3764|3964|3965|4321|4343|4599|4600|4615|4790|4938|4939|4940|5359|5371|5452|5610|5788|6351|6352|6355|6737|6772|6773|7098|7124|7292|7706|8091|8638|9111|9636|9641|10346|10561|10964|11040|11277|23586|24138|25939|51191|51284|54541|55337|55509|55601|57169|60489|64108|64135|79132|80149|81030|8…	ADAR|POLR3D|BST2|CHRM2|IFI6|GBP1|GBP3|HIF1A|IFI16|IFIT2|IFIT1|IFIT3|IFNAR2|IFNGR2|IL6|IL12A|CXCL10|IRF1|IRF2|IRF5|IRF7|ISG20|ITGB8|KCNJ8|LGALS8|LGALS9|MMP12|MOV10|MX1|MX2|MYD88|NFKB1|OAS1|OAS2|OAS3|PLSCR1|PML|POU2F2|EIF2AK2|PTPRC|CCL4|CCL5|CCL8|TRIM21|STAT1|STAT2|TLR3|TNF|TNFSF4|TRIM25|HMGA2|OASL|NMI|ISG15|IKBKE|TRIM22|IFI44|IFI44L|PIM2|TREX1|DDX58|IFIT5|SAMHD1|HERC5|TLR7|DDIT4|SHFL|BATF3|DDX60|Z…	-32	MyList
GO Biological Processes	19	GO:0031347	regulation of defense response	19_GO:0050896 response to stimulus	-34	3.6	16	30211	648	1550	120	7.7	0.68	103|134|135|329|330|634|661|718|834|837|961|1051|1540|1588|2069|2113|2161|2852|3075|3106|3133|3134|3428|3430|3434|3553|3569|3592|3594|3620|3659|3665|3818|3902|3965|4023|4067|4314|4318|4321|4615|4790|4792|4814|4862|4938|4940|5054|5359|5468|5734|5743|5788|6288|6318|6348|6352|6372|6737|6772|6773|7098|7124|7128|7130|7133|7292|7474|8767|9021|9111|9180|9314|9447|9536|9636|9641|10133|10318|10475|10769|1…	ADAR|ADORA1|ADORA2A|BIRC2|BIRC3|CEACAM1|POLR3D|C3|CASP1|CASP4|CD47|CEBPB|CYLD|CYP19A1|EREG|ETS1|F12|GPER1|CFH|HLA-B|HLA-E|HLA-F|IFI16|IFI35|IFIT1|IL1B|IL6|IL12A|IL12RB1|IDO1|IRF1|IRF7|KLKB1|LAG3|LGALS9|LPL|LYN|MMP3|MMP9|MMP12|MYD88|NFKB1|NFKBIA|NINJ1|NPAS2|OAS1|OAS3|SERPINE1|PLSCR1|PPARG|PTGER4|PTGS2|PTPRC|SAA1|SERPINB4|CCL3|CCL5|CXCL6|TRIM21|STAT1|STAT2|TLR3|TNF|TNFAIP3|TNFAIP6|TNFRSF1B|TNFSF4|W…	-31	MyList
GO Biological Processes	19	GO:0006954	inflammatory response	19_GO:0050896 response to stimulus	-33	3.9	16	30211	504	1550	102	6.6	0.63	133|134|135|445|623|624|718|719|837|960|1051|1116|1435|1903|1999|2149|2161|2683|2852|2919|2920|2921|3091|3428|3552|3553|3569|3576|3620|3627|3656|3663|3815|3818|3965|4067|4615|4790|4793|4814|4973|5293|5359|5606|5732|5734|5739|5743|5806|5971|6288|6289|6335|6347|6348|6351|6352|6354|6355|6364|6372|6373|6374|7098|7124|7128|7130|7133|7292|7412|8111|8605|8767|8876|9435|9447|9473|9734|10014|10318|10333|1…	ADM|ADORA1|ADORA2A|ASS1|BDKRB1|BDKRB2|C3|C3AR1|CASP4|CD44|CEBPB|CHI3L1|CSF1|S1PR3|ELF3|F2R|F12|B4GALT1|GPER1|CXCL1|CXCL2|CXCL3|HIF1A|IFI16|IL1A|IL1B|IL6|CXCL8|IDO1|CXCL10|IRAK2|IRF5|KIT|KLKB1|LGALS9|LYN|MYD88|NFKB1|NFKBIB|NINJ1|OLR1|PIK3CD|PLSCR1|MAP2K3|PTGER2|PTGER4|PTGIR|PTGS2|PTX3|RELB|SAA1|SAA2|SCN9A|CCL2|CCL3|CCL4|CCL5|CCL7|CCL8|CCL20|CXCL6|CXCL11|CXCL5|TLR3|TNF|TNFAIP3|TNFAIP6|TNFRSF1B|TNFS…	-29	MyList
GO Biological Processes	19	GO:0045087	innate immune response	19_GO:0044419 biological process involved in interspecies interaction between organisms	-30	3.2	14	30211	764	1550	124	8	0.69	103|445|629|639|661|684|715|716|717|718|834|837|961|972|1435|1540|1594|1906|2161|2207|2537|2633|2634|2635|2643|2852|3075|3106|3133|3428|3430|3433|3434|3437|3455|3594|3627|3659|3663|3665|3669|3718|3965|4067|4217|4599|4600|4615|4938|4939|4940|5293|5371|5468|5610|5806|5971|6347|6348|6351|6352|6354|6355|6364|6565|6672|6737|6772|6773|7098|7124|7474|7706|8542|8638|8767|8876|8942|9111|9447|9636|9830|101…	ADAR|ASS1|CFB|PRDM1|POLR3D|BST2|C1R|C1S|C2|C3|CASP1|CASP4|CD47|CD74|CSF1|CYLD|CYP27B1|EDN1|F12|FCER1G|IFI6|GBP1|GBP2|GBP3|GCH1|GPER1|CFH|HLA-B|HLA-E|IFI16|IFI35|IFIT2|IFIT1|IFIT3|IFNAR2|IL12RB1|CXCL10|IRF1|IRF5|IRF7|ISG20|JAK3|LGALS9|LYN|MAP3K5|MX1|MX2|MYD88|OAS1|OAS2|OAS3|PIK3CD|PML|PPARG|EIF2AK2|PTX3|RELB|CCL2|CCL3|CCL4|CCL5|CCL7|CCL8|CCL20|SLC15A2|SP100|TRIM21|STAT1|STAT2|TLR3|TNF|WNT5A|TRIM25…	-26	MyList
Reactome Gene Sets	6	R-HSA-913531	Interferon Signaling		-29	5.9	16	30211	199	1550	60	3.9	0.49	103|684|960|2537|2633|2634|2635|3106|3133|3134|3383|3430|3433|3434|3437|3455|3460|3659|3660|3663|3665|3669|4502|4599|4600|4938|4939|4940|5371|5610|5696|6672|6737|6772|6773|7318|7412|7706|8638|9021|9246|9636|9830|10346|10437|10475|11274|23321|23586|24138|25939|51191|54739|80128|80263|85363|91543|115361|115362|117854	ADAR|BST2|CD44|IFI6|GBP1|GBP2|GBP3|HLA-B|HLA-E|HLA-F|ICAM1|IFI35|IFIT2|IFIT1|IFIT3|IFNAR2|IFNGR2|IRF1|IRF2|IRF5|IRF7|ISG20|MT2A|MX1|MX2|OAS1|OAS2|OAS3|PML|EIF2AK2|PSMB8|SP100|TRIM21|STAT1|STAT2|UBA7|VCAM1|TRIM25|OASL|SOCS3|UBE2L6|ISG15|TRIM14|TRIM22|IFI30|TRIM38|USP18|TRIM2|DDX58|IFIT5|SAMHD1|HERC5|XAF1|TRIM46|TRIM45|TRIM5|RSAD2|GBP4|GBP5|TRIM6	-26	MyList
GO Biological Processes	19	GO:0051607	defense response to virus	19_GO:0044419 biological process involved in interspecies interaction between organisms	-29	5.4	16	30211	235	1550	65	4.2	0.51	103|661|684|2537|2633|2635|3428|3433|3434|3437|3455|3460|3569|3627|3659|3660|3663|3665|3669|3764|4343|4599|4600|4615|4938|4939|4940|5359|5371|5610|5788|6737|6772|6773|7098|7706|8638|9636|10346|10964|11277|23586|24138|25939|51191|51284|54541|55337|55601|57169|60489|64108|64135|79132|80149|81030|81622|83666|85363|91543|151636|197259|200316|282618|730249	ADAR|POLR3D|BST2|IFI6|GBP1|GBP3|IFI16|IFIT2|IFIT1|IFIT3|IFNAR2|IFNGR2|IL6|CXCL10|IRF1|IRF2|IRF5|IRF7|ISG20|KCNJ8|MOV10|MX1|MX2|MYD88|OAS1|OAS2|OAS3|PLSCR1|PML|EIF2AK2|PTPRC|TRIM21|STAT1|STAT2|TLR3|TRIM25|OASL|ISG15|TRIM22|IFI44L|TREX1|DDX58|IFIT5|SAMHD1|HERC5|TLR7|DDIT4|SHFL|DDX60|ZNFX1|APOBEC3G|RTP4|IFIH1|DHX58|ZC3H12A|ZBP1|UNC93B1|PARP9|TRIM5|RSAD2|DTX3L|MLKL|APOBEC3F|IFNL1|ACOD1	-26	MyList
GO Biological Processes	19	GO:0140546	defense response to symbiont	19_GO:0044419 biological process involved in interspecies interaction between organisms	-29	5.4	16	30211	236	1550	65	4.2	0.51	103|661|684|2537|2633|2635|3428|3433|3434|3437|3455|3460|3569|3627|3659|3660|3663|3665|3669|3764|4343|4599|4600|4615|4938|4939|4940|5359|5371|5610|5788|6737|6772|6773|7098|7706|8638|9636|10346|10964|11277|23586|24138|25939|51191|51284|54541|55337|55601|57169|60489|64108|64135|79132|80149|81030|81622|83666|85363|91543|151636|197259|200316|282618|730249	ADAR|POLR3D|BST2|IFI6|GBP1|GBP3|IFI16|IFIT2|IFIT1|IFIT3|IFNAR2|IFNGR2|IL6|CXCL10|IRF1|IRF2|IRF5|IRF7|ISG20|KCNJ8|MOV10|MX1|MX2|MYD88|OAS1|OAS2|OAS3|PLSCR1|PML|EIF2AK2|PTPRC|TRIM21|STAT1|STAT2|TLR3|TRIM25|OASL|ISG15|TRIM22|IFI44L|TREX1|DDX58|IFIT5|SAMHD1|HERC5|TLR7|DDIT4|SHFL|DDX60|ZNFX1|APOBEC3G|RTP4|IFIH1|DHX58|ZC3H12A|ZBP1|UNC93B1|PARP9|TRIM5|RSAD2|DTX3L|MLKL|APOBEC3F|IFNL1|ACOD1	-26	MyList
KEGG Pathway	24	hsa04668	TNF signaling pathway		-27	7.7	16	30211	112	1550	44	2.8	0.42	329|330|840|843|1051|1326|1435|1437|1906|2919|2920|2921|3383|3553|3569|3627|3659|3726|3976|4217|4314|4318|4323|4790|4792|5293|5606|5743|6347|6352|6364|6372|6374|7124|7128|7133|7185|7412|7424|8837|9021|9586|197259|257397	BIRC2|BIRC3|CASP7|CASP10|CEBPB|MAP3K8|CSF1|CSF2|EDN1|CXCL1|CXCL2|CXCL3|ICAM1|IL1B|IL6|CXCL10|IRF1|JUNB|LIF|MAP3K5|MMP3|MMP9|MMP14|NFKB1|NFKBIA|PIK3CD|MAP2K3|PTGS2|CCL2|CCL5|CCL20|CXCL6|CXCL5|TNF|TNFAIP3|TNFRSF1B|TRAF1|VCAM1|VEGFC|CFLAR|SOCS3|CREB5|MLKL|TAB3	-24	MyList
GO Biological Processes	19	GO:0002237	response to molecule of bacterial origin	19_GO:0044419 biological process involved in interspecies interaction between organisms	-27	4.3	14	30211	339	1550	75	4.8	0.55	19|25|133|445|623|717|834|1051|1437|1440|1594|1906|1948|2149|2643|2919|2920|2921|3552|3553|3569|3576|3592|3620|3627|3656|3663|3764|3965|4067|4615|4790|4792|4793|5054|5142|5606|5732|5734|5739|5743|6347|6348|6352|6372|6373|6374|6648|7124|7128|7133|7292|7412|7474|7494|7855|8564|8767|10318|10333|11009|26191|27063|27086|27178|29126|79931|80149|80380|114548|114769|117854|129607|342979|730249	ABCA1|ABL1|ADM|ASS1|BDKRB1|C2|CASP1|CEBPB|CSF2|CSF3|CYP27B1|EDN1|EFNB2|F2R|GCH1|CXCL1|CXCL2|CXCL3|IL1A|IL1B|IL6|CXCL8|IL12A|IDO1|CXCL10|IRAK2|IRF5|KCNJ8|LGALS9|LYN|MYD88|NFKB1|NFKBIA|NFKBIB|SERPINE1|PDE4B|MAP2K3|PTGER2|PTGER4|PTGIR|PTGS2|CCL2|CCL3|CCL5|CXCL6|CXCL11|CXCL5|SOD2|TNF|TNFAIP3|TNFRSF1B|TNFSF4|VCAM1|WNT5A|XBP1|FZD5|KMO|RIPK2|TNIP1|TLR6|IL24|PTPN22|ANKRD1|FOXP1|IL37|CD274|TNIP3|ZC3H12A|P…	-23	MyList
GO Biological Processes	19	GO:0019221	cytokine-mediated signaling pathway	19_GO:0023052 signaling	-26	4.2	14	30211	352	1550	76	4.9	0.55	329|330|634|960|972|1435|1437|1440|2069|2207|2919|2920|2921|3455|3460|3552|3553|3569|3574|3575|3576|3594|3598|3601|3627|3656|3659|3663|3665|3718|3815|3875|4599|4615|4792|4938|4939|6347|6348|6351|6352|6354|6355|6364|6372|6373|6374|6672|6772|6773|6775|6776|7124|7133|7185|7357|8638|8718|8784|8995|9111|9180|9244|9447|9641|10019|10148|10673|11277|23236|27178|51554|55504|60401|90865|146433	BIRC2|BIRC3|CEACAM1|CD44|CD74|CSF1|CSF2|CSF3|EREG|FCER1G|CXCL1|CXCL2|CXCL3|IFNAR2|IFNGR2|IL1A|IL1B|IL6|IL7|IL7R|CXCL8|IL12RB1|IL13RA2|IL15RA|CXCL10|IRAK2|IRF1|IRF5|IRF7|JAK3|KIT|KRT18|MX1|MYD88|NFKBIA|OAS1|OAS2|CCL2|CCL3|CCL4|CCL5|CCL7|CCL8|CCL20|CXCL6|CXCL11|CXCL5|SP100|STAT1|STAT2|STAT4|STAT5A|TNF|TNFRSF1B|TRAF1|UGCG|OASL|TNFRSF25|TNFRSF18|TNFSF18|NMI|OSMR|CRLF1|AIM2|IKBKE|SH2B3|EBI3|TNFSF13B|T…	-23	MyList
GO Biological Processes	19	GO:0032496	response to lipopolysaccharide	19_GO:0044419 biological process involved in interspecies interaction between organisms	-26	4.4	14	30211	318	1550	72	4.6	0.53	19|25|133|445|623|717|834|1051|1437|1440|1594|1906|1948|2149|2643|2919|2920|2921|3552|3553|3569|3576|3592|3620|3627|3656|3764|3965|4067|4615|4790|4792|4793|5054|5142|5606|5732|5734|5739|5743|6347|6348|6352|6372|6373|6374|6648|7124|7128|7133|7292|7412|7474|7494|8564|8767|10318|11009|26191|27063|27086|27178|29126|79931|80149|80380|114548|114769|117854|129607|342979|730249	ABCA1|ABL1|ADM|ASS1|BDKRB1|C2|CASP1|CEBPB|CSF2|CSF3|CYP27B1|EDN1|EFNB2|F2R|GCH1|CXCL1|CXCL2|CXCL3|IL1A|IL1B|IL6|CXCL8|IL12A|IDO1|CXCL10|IRAK2|KCNJ8|LGALS9|LYN|MYD88|NFKB1|NFKBIA|NFKBIB|SERPINE1|PDE4B|MAP2K3|PTGER2|PTGER4|PTGIR|PTGS2|CCL2|CCL3|CCL5|CXCL6|CXCL11|CXCL5|SOD2|TNF|TNFAIP3|TNFRSF1B|TNFSF4|VCAM1|WNT5A|XBP1|KMO|RIPK2|TNIP1|IL24|PTPN22|ANKRD1|FOXP1|IL37|CD274|TNIP3|ZC3H12A|PDCD1LG2|NLRP3|C…	-23	MyList
GO Biological Processes	19	GO:0002683	negative regulation of immune system process	19_GO:0002376 immune system process	-26	3.9	14	30211	425	1550	84	5.4	0.58	103|134|135|196|634|652|684|861|868|961|972|1051|1379|1588|1803|1997|2624|2633|2852|3106|3112|3133|3134|3142|3204|3398|3428|3575|3598|3620|3623|3624|3659|3718|3902|3965|4067|4321|4938|4940|5468|5734|5788|6318|6347|6348|6662|6737|6773|7043|7098|7124|7128|7130|7292|7940|8111|9111|9404|9636|10385|10769|10906|11274|11277|23236|25939|26191|27242|29126|54625|56833|64115|79132|79651|80149|80380|84830|14…	ADAR|ADORA1|ADORA2A|AHR|CEACAM1|BMP4|BST2|RUNX1|CBLB|CD47|CD74|CEBPB|CR1L|CYP19A1|DPP4|ELF1|GATA2|GBP1|GPER1|HLA-B|HLA-DOB|HLA-E|HLA-F|HLX|HOXA7|ID2|IFI16|IL7R|IL13RA2|IDO1|INHA|INHBA|IRF1|JAK3|LAG3|LGALS9|LYN|MMP12|OAS1|OAS3|PPARG|PTGER4|PTPRC|SERPINB4|CCL2|CCL3|SOX9|TRIM21|STAT2|TGFB3|TLR3|TNF|TNFAIP3|TNFAIP6|TNFSF4|LST1|GPR68|NMI|LPXN|ISG15|BTN2A2|PLK2|TRAFD1|USP18|TREX1|PLCB1|SAMHD1|PTPN22|TN…	-23	MyList
GO Biological Processes	19	GO:0030155	regulation of cell adhesion	19_GO:0022610 biological adhesion	-26	3	13	30211	760	1550	117	7.5	0.67	18|25|135|445|634|652|861|868|960|961|972|999|1051|1326|1435|1803|1901|1942|1948|1952|2049|2065|2113|2633|2736|3037|3112|3133|3142|3204|3371|3481|3552|3553|3569|3574|3575|3576|3592|3594|3620|3659|3714|3718|3902|3909|3911|3965|3976|4008|4067|4155|4321|4323|4582|4651|4739|5054|5270|5328|5329|5364|5371|5788|5800|6288|6347|6352|6591|6662|6666|7124|7292|7412|7422|7474|7494|8013|8613|8767|8784|8876|899…	ABAT|ABL1|ADORA2A|ASS1|CEACAM1|BMP4|RUNX1|CBLB|CD44|CD47|CD74|CDH1|CEBPB|MAP3K8|CSF1|DPP4|S1PR1|EFNA1|EFNB2|CELSR2|EPHB3|ERBB3|ETS1|GBP1|GLI2|HAS2|HLA-DOB|HLA-E|HLX|HOXA7|TNC|IGF2|IL1A|IL1B|IL6|IL7|IL7R|CXCL8|IL12A|IL12RB1|IDO1|IRF1|JAG2|JAK3|LAG3|LAMA3|LAMA5|LGALS9|LIF|LMO7|LYN|MBP|MMP12|MMP14|MUC1|MYO10|NEDD9|SERPINE1|SERPINE2|PLAU|PLAUR|PLXNB1|PML|PTPRC|PTPRO|SAA1|CCL2|CCL5|SNAI2|SOX9|SOX12|TN…	-23	MyList
GO Biological Processes	19	GO:0001819	positive regulation of cytokine production	19_GO:0048518 positive regulation of biological process	-26	3.7	14	30211	475	1550	89	5.7	0.59	25|661|718|719|834|861|947|972|1051|1116|1437|2069|2149|2207|3091|3133|3134|3357|3428|3552|3553|3569|3574|3592|3594|3620|3659|3663|3665|3815|3965|4023|4050|4060|4155|4321|4615|4938|4939|4940|5054|5142|5293|5452|5610|5734|5743|5788|6288|6348|6772|7098|7124|7292|7474|7494|7855|8013|8767|9308|9447|9636|10148|10333|11118|11119|23180|23236|23586|24145|26191|27086|28984|29126|51284|51704|64135|79132|90…	ABL1|POLR3D|C3|C3AR1|CASP1|RUNX1|CD34|CD74|CEBPB|CHI3L1|CSF2|EREG|F2R|FCER1G|HIF1A|HLA-E|HLA-F|HTR2B|IFI16|IL1A|IL1B|IL6|IL7|IL12A|IL12RB1|IDO1|IRF1|IRF5|IRF7|KIT|LGALS9|LPL|LTB|LUM|MBP|MMP12|MYD88|OAS1|OAS2|OAS3|SERPINE1|PDE4B|PIK3CD|POU2F2|EIF2AK2|PTGER4|PTGS2|PTPRC|SAA1|CCL3|STAT1|TLR3|TNF|TNFSF4|WNT5A|XBP1|FZD5|NR4A3|RIPK2|CD83|AIM2|ISG15|EBI3|TLR6|BTN3A2|BTN3A1|RFTN1|PLCB1|DDX58|PANX1|PTPN22…	-23	MyList
GO Biological Processes	19	GO:0022407	regulation of cell-cell adhesion	19_GO:0022610 biological adhesion	-24	3.6	13	30211	456	1550	84	5.4	0.58	18|25|135|445|634|652|861|868|960|961|972|999|1051|1326|1803|1948|1952|2049|2113|2736|3037|3112|3133|3142|3481|3552|3553|3569|3574|3575|3592|3594|3620|3659|3718|3902|3965|4067|4155|4651|5270|5329|5788|6347|6352|6666|7124|7292|7412|7422|7474|7494|8013|8613|8767|8876|9223|9308|9314|9435|9580|10019|10148|10385|10673|11151|23149|23308|26191|27242|28984|29126|57829|64115|64332|80149|80380|84830|114548…	ABAT|ABL1|ADORA2A|ASS1|CEACAM1|BMP4|RUNX1|CBLB|CD44|CD47|CD74|CDH1|CEBPB|MAP3K8|DPP4|EFNB2|CELSR2|EPHB3|ETS1|GLI2|HAS2|HLA-DOB|HLA-E|HLX|IGF2|IL1A|IL1B|IL6|IL7|IL7R|IL12A|IL12RB1|IDO1|IRF1|JAK3|LAG3|LGALS9|LYN|MBP|MYO10|SERPINE2|PLAUR|PTPRC|CCL2|CCL5|SOX12|TNF|TNFSF4|VCAM1|VEGFA|WNT5A|XBP1|NR4A3|PLPP3|RIPK2|VNN1|MAGI1|CD83|KLF4|CHST2|SOX13|SH2B3|EBI3|BTN2A2|TNFSF13B|CORO1A|FCHO1|ICOSLG|PTPN22|TNF…	-21	MyList
GO Biological Processes	19	GO:0035239	tube morphogenesis	19_GO:0032502 developmental process	-24	3.1	12	30211	661	1550	104	6.7	0.64	25|133|367|374|634|639|652|947|1000|1435|1890|1901|1906|1942|1948|2049|2050|2069|2247|2321|2535|2624|2637|2668|2683|2697|2735|2736|3037|3091|3142|3198|3200|3202|3204|3397|3398|3576|3674|3696|3726|3911|4015|4211|4223|4323|4814|4824|5054|5087|5156|5371|5743|5916|6091|6303|6347|6355|6474|6608|6662|6911|6935|7026|7127|7421|7422|7424|7453|7474|7477|7494|7855|8828|8862|9464|11082|23129|23251|23462|2367…	ABL1|ADM|AR|AREG|CEACAM1|PRDM1|BMP4|CD34|CDH2|CSF1|TYMP|S1PR1|EDN1|EFNA1|EFNB2|EPHB3|EPHB4|EREG|FGF2|FLT1|FZD2|GATA2|GBX2|GDNF|B4GALT1|GJA1|GLI1|GLI2|HAS2|HIF1A|HLX|HOXA1|HOXA3|HOXA5|HOXA7|ID1|ID2|CXCL8|ITGA2B|ITGB8|JUNB|LAMA5|LOX|MEIS1|MEOX2|MMP14|NINJ1|NKX3-1|SERPINE1|PBX1|PDGFRA|PML|PTGS2|RARG|ROBO1|SAT1|CCL2|CCL8|SHOX2|SMO|SOX9|TBX6|ZEB1|NR2F2|TNFAIP2|VDR|VEGFA|VEGFC|WARS1|WNT5A|WNT7B|XBP1|FZ…	-21	MyList
Reactome Gene Sets	6	R-HSA-909733	Interferon alpha/beta signaling		-24	9.2	16	30211	70	1550	33	2.1	0.37	103|684|2537|2634|3106|3133|3134|3430|3433|3434|3437|3455|3659|3660|3663|3665|3669|4599|4600|4938|4939|4940|5696|6772|6773|8638|9021|9636|11274|24138|25939|54739|91543	ADAR|BST2|IFI6|GBP2|HLA-B|HLA-E|HLA-F|IFI35|IFIT2|IFIT1|IFIT3|IFNAR2|IRF1|IRF2|IRF5|IRF7|ISG20|MX1|MX2|OAS1|OAS2|OAS3|PSMB8|STAT1|STAT2|OASL|SOCS3|ISG15|USP18|IFIT5|SAMHD1|XAF1|RSAD2	-20	MyList
Reactome Gene Sets	6	R-HSA-449147	Signaling by Interleukins		-23	3.5	13	30211	462	1550	83	5.4	0.57	834|1052|1326|1435|1437|1440|1846|1901|2247|2308|2919|2920|3091|3383|3552|3553|3569|3574|3575|3576|3589|3592|3594|3598|3601|3627|3656|3718|3726|3911|3936|3965|3976|4067|4312|4314|4318|4582|4615|4790|4791|4792|4793|5055|5293|5606|5696|5698|5699|5721|5743|5783|6195|6288|6347|6348|6351|6352|6364|6648|6772|6773|6775|6776|6935|7124|7133|7412|7422|8356|8767|8835|9021|9180|9235|9244|10148|11009|27178|90…	CASP1|CEBPD|MAP3K8|CSF1|CSF2|CSF3|DUSP4|S1PR1|FGF2|FOXO1|CXCL1|CXCL2|HIF1A|ICAM1|IL1A|IL1B|IL6|IL7|IL7R|CXCL8|IL11|IL12A|IL12RB1|IL13RA2|IL15RA|CXCL10|IRAK2|JAK3|JUNB|LAMA5|LCP1|LGALS9|LIF|LYN|MMP1|MMP3|MMP9|MUC1|MYD88|NFKB1|NFKB2|NFKBIA|NFKBIB|SERPINB2|PIK3CD|MAP2K3|PSMB8|PSMB9|PSMB10|PSME2|PTGS2|PTPN13|RPS6KA1|SAA1|CCL2|CCL3|CCL4|CCL5|CCL20|SOD2|STAT1|STAT2|STAT4|STAT5A|ZEB1|TNF|TNFRSF1B|VCAM1|…	-20	MyList
GO Biological Processes	19	GO:0002831	regulation of response to biotic stimulus	19_GO:0050896 response to stimulus	-23	3.9	13	30211	351	1550	71	4.6	0.53	103|196|329|330|634|661|2069|3075|3106|3133|3134|3428|3430|3434|3553|3592|3594|3659|3665|3902|3965|4067|4321|4938|4940|5359|5468|6318|6352|6372|6737|6772|6773|7128|7474|8638|8767|9111|9447|9636|9641|10133|10475|10906|11274|11277|23586|25939|26191|27086|29126|51191|51752|54625|55601|56833|57169|60489|79132|80149|81030|83666|85363|114769|115362|117854|151636|200316|259307|338322|730249	ADAR|AHR|BIRC2|BIRC3|CEACAM1|POLR3D|EREG|CFH|HLA-B|HLA-E|HLA-F|IFI16|IFI35|IFIT1|IL1B|IL12A|IL12RB1|IRF1|IRF7|LAG3|LGALS9|LYN|MMP12|OAS1|OAS3|PLSCR1|PPARG|SERPINB4|CCL5|CXCL6|TRIM21|STAT1|STAT2|TNFAIP3|WNT5A|OASL|RIPK2|NMI|AIM2|ISG15|IKBKE|OPTN|TRIM38|TRAFD1|USP18|TREX1|DDX58|SAMHD1|PTPN22|FOXP1|CD274|HERC5|ERAP1|PARP14|DDX60|SLAMF8|ZNFX1|APOBEC3G|DHX58|ZC3H12A|ZBP1|PARP9|TRIM5|CARD16|GBP5|TRIM6|…	-20	MyList
GO Biological Processes	19	GO:0071219	cellular response to molecule of bacterial origin	19_GO:0044419 biological process involved in interspecies interaction between organisms	-22	5	13	30211	212	1550	54	3.5	0.47	19|25|445|834|1051|1437|1440|1948|2919|2920|2921|3552|3553|3569|3576|3627|3656|4067|4615|4790|4792|4793|5054|5142|5606|6347|6348|6352|6372|6373|6374|7124|7128|7133|7292|7474|7494|7855|8564|8767|10318|10333|11009|26191|27063|27178|29126|79931|80149|80380|114548|114769|129607|730249	ABCA1|ABL1|ASS1|CASP1|CEBPB|CSF2|CSF3|EFNB2|CXCL1|CXCL2|CXCL3|IL1A|IL1B|IL6|CXCL8|CXCL10|IRAK2|LYN|MYD88|NFKB1|NFKBIA|NFKBIB|SERPINE1|PDE4B|MAP2K3|CCL2|CCL3|CCL5|CXCL6|CXCL11|CXCL5|TNF|TNFAIP3|TNFRSF1B|TNFSF4|WNT5A|XBP1|FZD5|KMO|RIPK2|TNIP1|TLR6|IL24|PTPN22|ANKRD1|IL37|CD274|TNIP3|ZC3H12A|PDCD1LG2|NLRP3|CARD16|CMPK2|ACOD1	-19	MyList
Reactome Gene Sets	6	R-HSA-877300	Interferon gamma signaling		-22	7.7	15	30211	91	1550	36	2.3	0.38	960|2633|2634|2635|3106|3133|3134|3383|3460|3659|3660|3663|3665|4502|4938|4939|4940|5371|6672|6737|6772|7412|7706|8638|9021|9830|10346|10437|10475|23321|80128|80263|85363|115361|115362|117854	CD44|GBP1|GBP2|GBP3|HLA-B|HLA-E|HLA-F|ICAM1|IFNGR2|IRF1|IRF2|IRF5|IRF7|MT2A|OAS1|OAS2|OAS3|PML|SP100|TRIM21|STAT1|VCAM1|TRIM25|OASL|SOCS3|TRIM14|TRIM22|IFI30|TRIM38|TRIM2|TRIM46|TRIM45|TRIM5|GBP4|GBP5|TRIM6	-19	MyList
GO Biological Processes	19	GO:0071222	cellular response to lipopolysaccharide	19_GO:0044419 biological process involved in interspecies interaction between organisms	-22	5.1	13	30211	200	1550	52	3.4	0.46	19|25|445|834|1051|1437|1440|1948|2919|2920|2921|3552|3553|3569|3576|3627|3656|4067|4615|4790|4792|4793|5054|5142|5606|6347|6348|6352|6372|6373|6374|7124|7128|7133|7292|7474|7494|8564|8767|10318|11009|26191|27063|27178|29126|79931|80149|80380|114548|114769|129607|730249	ABCA1|ABL1|ASS1|CASP1|CEBPB|CSF2|CSF3|EFNB2|CXCL1|CXCL2|CXCL3|IL1A|IL1B|IL6|CXCL8|CXCL10|IRAK2|LYN|MYD88|NFKB1|NFKBIA|NFKBIB|SERPINE1|PDE4B|MAP2K3|CCL2|CCL3|CCL5|CXCL6|CXCL11|CXCL5|TNF|TNFAIP3|TNFRSF1B|TNFSF4|WNT5A|XBP1|KMO|RIPK2|TNIP1|IL24|PTPN22|ANKRD1|IL37|CD274|TNIP3|ZC3H12A|PDCD1LG2|NLRP3|CARD16|CMPK2|ACOD1	-19	MyList
Canonical Pathways	11	M5885	NABA MATRISOME ASSOCIATED		-22	2.8	12	30211	751	1550	108	7	0.65	374|627|652|685|1435|1437|1440|1520|1839|1955|2069|2161|2247|2252|2323|2668|2919|2920|2921|3053|3084|3481|3552|3553|3569|3574|3576|3589|3592|3623|3624|3627|3699|3964|3965|3976|4015|4050|4312|4314|4318|4319|4320|4321|4323|4582|4803|5054|5055|5069|5270|5271|5328|5364|6274|6318|6347|6348|6351|6352|6354|6355|6364|6372|6373|6374|7043|7092|7124|7292|7422|7424|7474|7477|7869|8200|8743|8974|8995|9244|101…	AREG|BDNF|BMP4|BTC|CSF1|CSF2|CSF3|CTSS|HBEGF|MEGF9|EREG|F12|FGF2|FGF7|FLT3LG|GDNF|CXCL1|CXCL2|CXCL3|SERPIND1|NRG1|IGF2|IL1A|IL1B|IL6|IL7|CXCL8|IL11|IL12A|INHA|INHBA|CXCL10|ITIH3|LGALS8|LGALS9|LIF|LOX|LTB|MMP1|MMP3|MMP9|MMP10|MMP11|MMP12|MMP14|MUC1|NGF|SERPINE1|SERPINB2|PAPPA|SERPINE2|SERPINB8|PLAU|PLXNB1|S100A3|SERPINB4|CCL2|CCL3|CCL4|CCL5|CCL7|CCL8|CCL20|CXCL6|CXCL11|CXCL5|TGFB3|TLL1|TNF|TNFSF4|…	-19	MyList
WikiPathways	27	WP5115	Network map of SARS-CoV-2 signaling pathway		-21	4.8	13	30211	221	1550	54	3.5	0.47	196|341|629|637|684|715|716|1051|1294|2247|2537|2919|2920|2921|3075|3091|3434|3552|3553|3569|3574|3576|3592|3627|3699|3726|4599|4615|4791|4939|5054|5743|6288|6289|6347|6348|6351|6352|6355|6364|6372|6374|6772|7124|8542|8743|10964|11119|23586|54541|58191|64135|90865|114548	AHR|APOC1|CFB|BID|BST2|C1R|C1S|CEBPB|COL7A1|FGF2|IFI6|CXCL1|CXCL2|CXCL3|CFH|HIF1A|IFIT1|IL1A|IL1B|IL6|IL7|CXCL8|IL12A|CXCL10|ITIH3|JUNB|MX1|MYD88|NFKB2|OAS2|SERPINE1|PTGS2|SAA1|SAA2|CCL2|CCL3|CCL4|CCL5|CCL8|CCL20|CXCL6|CXCL5|STAT1|TNF|APOL1|TNFSF10|IFI44L|BTN3A1|DDX58|DDIT4|CXCL16|IFIH1|IL33|NLRP3	-19	MyList
GO Biological Processes	19	GO:1903706	regulation of hemopoiesis	19_GO:0002376 immune system process	-21	3.7	12	30211	371	1550	71	4.6	0.53	25|634|639|652|861|972|1051|1435|1440|2113|2124|2624|2736|3091|3106|3142|3202|3204|3205|3398|3574|3575|3594|3601|3623|3624|3659|3665|3718|3902|3965|3976|4015|4067|4211|4286|4323|4792|5788|5916|6348|6666|6772|6935|7098|7124|7130|7292|7494|8111|8359|8767|8876|9308|9580|9636|9760|10385|27086|28514|56833|56892|64115|64332|80149|114548|146433|259307|282618|338382|407006	ABL1|CEACAM1|PRDM1|BMP4|RUNX1|CD74|CEBPB|CSF1|CSF3|ETS1|EVI2B|GATA2|GLI2|HIF1A|HLA-B|HLX|HOXA5|HOXA7|HOXA9|ID2|IL7|IL7R|IL12RB1|IL15RA|INHA|INHBA|IRF1|IRF7|JAK3|LAG3|LGALS9|LIF|LOX|LYN|MEIS1|MITF|MMP14|NFKBIA|PTPRC|RARG|CCL3|SOX12|STAT1|ZEB1|TLR3|TNF|TNFAIP6|TNFSF4|XBP1|GPR68|H4C1|RIPK2|VNN1|CD83|SOX13|ISG15|TOX|BTN2A2|FOXP1|DLL1|SLAMF8|TCIM|VSIR|NFKBIZ|ZC3H12A|NLRP3|IL34|IL4I1|IFNL1|RAB7B|MIR221	-18	MyList
GO Biological Processes	19	GO:0071216	cellular response to biotic stimulus	19_GO:0050896 response to stimulus	-21	4.6	13	30211	239	1550	56	3.6	0.47	19|25|445|834|1051|1437|1440|1948|2919|2920|2921|3309|3552|3553|3569|3576|3627|3656|4067|4615|4790|4792|4793|5054|5142|5606|6347|6348|6352|6372|6373|6374|7124|7128|7133|7292|7474|7494|7855|8564|8767|10318|10333|10628|11009|26191|27063|27178|29126|79931|80149|80380|114548|114769|129607|730249	ABCA1|ABL1|ASS1|CASP1|CEBPB|CSF2|CSF3|EFNB2|CXCL1|CXCL2|CXCL3|HSPA5|IL1A|IL1B|IL6|CXCL8|CXCL10|IRAK2|LYN|MYD88|NFKB1|NFKBIA|NFKBIB|SERPINE1|PDE4B|MAP2K3|CCL2|CCL3|CCL5|CXCL6|CXCL11|CXCL5|TNF|TNFAIP3|TNFRSF1B|TNFSF4|WNT5A|XBP1|FZD5|KMO|RIPK2|TNIP1|TLR6|TXNIP|IL24|PTPN22|ANKRD1|IL37|CD274|TNIP3|ZC3H12A|PDCD1LG2|NLRP3|CARD16|CMPK2|ACOD1	-18	MyList
GO Biological Processes	19	GO:0071396	cellular response to lipid	19_GO:0050896 response to stimulus	-21	3.3	12	30211	499	1550	84	5.4	0.58	19|25|196|367|445|490|652|834|1051|1080|1437|1440|1906|1948|2852|2919|2920|2921|3399|3552|3553|3569|3576|3624|3627|3656|4023|4067|4615|4654|4790|4792|4793|4824|5054|5142|5606|5916|6347|6348|6352|6372|6373|6374|6608|6662|6751|6781|7023|7124|7128|7133|7292|7421|7474|7477|7494|8013|8564|8767|8837|9464|10318|11009|23236|26191|27063|27178|29126|54541|54762|55022|55809|79931|80149|80380|84709|84830|114…	ABCA1|ABL1|AHR|AR|ASS1|ATP2B1|BMP4|CASP1|CEBPB|CFTR|CSF2|CSF3|EDN1|EFNB2|GPER1|CXCL1|CXCL2|CXCL3|ID3|IL1A|IL1B|IL6|CXCL8|INHBA|CXCL10|IRAK2|LPL|LYN|MYD88|MYOD1|NFKB1|NFKBIA|NFKBIB|NKX3-1|SERPINE1|PDE4B|MAP2K3|RARG|CCL2|CCL3|CCL5|CXCL6|CXCL11|CXCL5|SMO|SOX9|SSTR1|STC1|TFAP4|TNF|TNFAIP3|TNFRSF1B|TNFSF4|VDR|WNT5A|WNT7B|XBP1|NR4A3|KMO|RIPK2|CFLAR|HAND2|TNIP1|IL24|PLCB1|PTPN22|ANKRD1|IL37|CD274|DDIT4|…	-18	MyList
GO Biological Processes	19	GO:1903037	regulation of leukocyte cell-cell adhesion	19_GO:0022610 biological adhesion	-21	3.9	12	30211	344	1550	68	4.4	0.52	135|445|634|652|861|868|960|961|972|1051|1326|1803|1948|2113|2736|3037|3112|3133|3142|3481|3552|3553|3569|3574|3575|3592|3594|3620|3659|3718|3902|3965|4067|5788|6347|6352|6666|7124|7292|7412|7494|8013|8767|8876|9308|9314|9435|9580|10148|10385|10673|11151|23149|23308|26191|27242|29126|57829|64115|64332|80149|80380|84830|114548|259307|282618|283234|407006	ADORA2A|ASS1|CEACAM1|BMP4|RUNX1|CBLB|CD44|CD47|CD74|CEBPB|MAP3K8|DPP4|EFNB2|ETS1|GLI2|HAS2|HLA-DOB|HLA-E|HLX|IGF2|IL1A|IL1B|IL6|IL7|IL7R|IL12A|IL12RB1|IDO1|IRF1|JAK3|LAG3|LGALS9|LYN|PTPRC|CCL2|CCL5|SOX12|TNF|TNFSF4|VCAM1|XBP1|NR4A3|RIPK2|VNN1|CD83|KLF4|CHST2|SOX13|EBI3|BTN2A2|TNFSF13B|CORO1A|FCHO1|ICOSLG|PTPN22|TNFRSF21|CD274|ZP4|VSIR|NFKBIZ|ZC3H12A|PDCD1LG2|ADTRP|NLRP3|IL4I1|IFNL1|CCDC88B|MIR221	-18	MyList
GO Biological Processes	19	GO:0050865	regulation of cell activation	19_GO:0050789 regulation of biological process	-21	2.9	12	30211	681	1550	101	6.5	0.63	18|25|135|196|634|639|652|825|861|868|961|972|1051|1326|1803|1948|2207|2624|2736|2852|3112|3133|3134|3142|3398|3481|3552|3553|3569|3574|3575|3592|3594|3598|3601|3620|3623|3624|3659|3718|3902|3965|4067|4323|4615|5156|5270|5359|5788|6195|6347|6348|6352|6665|6666|6935|7124|7128|7133|7292|7412|7474|7494|7940|8013|8767|8876|8995|9308|9473|9580|9760|10019|10148|10333|10385|10673|11151|11277|23149|23308…	ABAT|ABL1|ADORA2A|AHR|CEACAM1|PRDM1|BMP4|CAPN3|RUNX1|CBLB|CD47|CD74|CEBPB|MAP3K8|DPP4|EFNB2|FCER1G|GATA2|GLI2|GPER1|HLA-DOB|HLA-E|HLA-F|HLX|ID2|IGF2|IL1A|IL1B|IL6|IL7|IL7R|IL12A|IL12RB1|IL13RA2|IL15RA|IDO1|INHA|INHBA|IRF1|JAK3|LAG3|LGALS9|LYN|MMP14|MYD88|PDGFRA|SERPINE2|PLSCR1|PTPRC|RPS6KA1|CCL2|CCL3|CCL5|SOX15|SOX12|ZEB1|TNF|TNFAIP3|TNFRSF1B|TNFSF4|VCAM1|WNT5A|XBP1|LST1|NR4A3|RIPK2|VNN1|TNFSF18|…	-18	MyList
GO Biological Processes	19	GO:0001568	blood vessel development	19_GO:0032502 developmental process	-21	3.3	12	30211	503	1550	84	5.4	0.58	133|196|634|639|652|947|1000|1890|1901|1906|1942|1948|2049|2050|2069|2247|2308|2321|2624|2637|2683|2697|3037|3091|3198|3200|3204|3397|3576|3674|3696|3726|4015|4211|4223|4323|4814|4824|5054|5156|5743|6091|6303|6347|6355|6608|7026|7127|7422|7424|7453|7477|7494|7855|8828|8862|9021|9464|10512|11082|11277|23129|23251|23462|23670|28514|51752|54538|54567|55897|57381|64218|79625|80149|83478|84830|84870|9…	ADM|AHR|CEACAM1|PRDM1|BMP4|CD34|CDH2|TYMP|S1PR1|EDN1|EFNA1|EFNB2|EPHB3|EPHB4|EREG|FGF2|FOXO1|FLT1|GATA2|GBX2|B4GALT1|GJA1|HAS2|HIF1A|HOXA1|HOXA3|HOXA7|ID1|CXCL8|ITGA2B|ITGB8|JUNB|LOX|MEIS1|MEOX2|MMP14|NINJ1|NKX3-1|SERPINE1|PDGFRA|PTGS2|ROBO1|SAT1|CCL2|CCL8|SMO|NR2F2|TNFAIP2|VEGFA|VEGFC|WARS1|WNT7B|XBP1|FZD5|NRP2|APLN|SOCS3|HAND2|SEMA3C|ESM1|TREX1|PLXND1|MINAR1|HEY1|CEMIP2|DLL1|ERAP1|ROBO4|DLL4|ME…	-18	MyList
GO Biological Processes	19	GO:0001944	vasculature development	19_GO:0032502 developmental process	-21	3.2	12	30211	526	1550	86	5.5	0.58	133|196|634|639|652|947|1000|1890|1901|1906|1942|1948|2049|2050|2069|2247|2308|2321|2624|2637|2683|2697|3037|3091|3198|3200|3204|3397|3576|3674|3696|3726|3964|3976|4015|4211|4223|4323|4814|4824|5054|5156|5743|6091|6303|6347|6355|6608|7026|7127|7422|7424|7453|7477|7494|7855|8828|8862|9021|9464|10512|11082|11277|23129|23251|23462|23670|28514|51752|54538|54567|55897|57381|64218|79625|80149|83478|848…	ADM|AHR|CEACAM1|PRDM1|BMP4|CD34|CDH2|TYMP|S1PR1|EDN1|EFNA1|EFNB2|EPHB3|EPHB4|EREG|FGF2|FOXO1|FLT1|GATA2|GBX2|B4GALT1|GJA1|HAS2|HIF1A|HOXA1|HOXA3|HOXA7|ID1|CXCL8|ITGA2B|ITGB8|JUNB|LGALS8|LIF|LOX|MEIS1|MEOX2|MMP14|NINJ1|NKX3-1|SERPINE1|PDGFRA|PTGS2|ROBO1|SAT1|CCL2|CCL8|SMO|NR2F2|TNFAIP2|VEGFA|VEGFC|WARS1|WNT7B|XBP1|FZD5|NRP2|APLN|SOCS3|HAND2|SEMA3C|ESM1|TREX1|PLXND1|MINAR1|HEY1|CEMIP2|DLL1|ERAP1|RO…	-18	MyList
KEGG Pathway	24	hsa04060	Cytokine-cytokine receptor interaction		-21	4.1	12	30211	295	1550	62	4	0.5	652|1435|1437|1440|2919|2920|2921|3455|3460|3552|3553|3569|3574|3575|3576|3589|3592|3594|3598|3601|3604|3623|3624|3627|3976|4050|4803|4982|6347|6348|6351|6352|6354|6355|6364|6372|6373|6374|7043|7124|7133|7292|8200|8718|8743|8784|8795|8995|9180|9235|10148|10673|11009|27178|27242|51554|55504|58191|60401|90865|146433|282618	BMP4|CSF1|CSF2|CSF3|CXCL1|CXCL2|CXCL3|IFNAR2|IFNGR2|IL1A|IL1B|IL6|IL7|IL7R|CXCL8|IL11|IL12A|IL12RB1|IL13RA2|IL15RA|TNFRSF9|INHA|INHBA|CXCL10|LIF|LTB|NGF|TNFRSF11B|CCL2|CCL3|CCL4|CCL5|CCL7|CCL8|CCL20|CXCL6|CXCL11|CXCL5|TGFB3|TNF|TNFRSF1B|TNFSF4|GDF5|TNFRSF25|TNFSF10|TNFRSF18|TNFRSF10B|TNFSF18|OSMR|IL32|EBI3|TNFSF13B|IL24|IL37|TNFRSF21|ACKR4|TNFRSF19|CXCL16|EDA2R|IL33|IL34|IFNL1	-18	MyList
GO Biological Processes	19	GO:0030335	positive regulation of cell migration	19_GO:0040011 locomotion	-21	3.1	12	30211	560	1550	89	5.7	0.59	25|623|652|719|961|972|1435|1839|1901|1906|2113|2149|2247|2252|2321|2624|2852|2886|3037|3091|3309|3383|3552|3553|3569|3576|3592|3627|3655|3815|3918|3965|4067|4318|4323|4739|5054|5156|5293|5328|5606|5641|5743|5788|6348|6351|6352|6354|6355|6364|6591|6608|6615|6648|6662|6776|7124|7130|7422|7424|7474|7494|7869|8013|8613|8784|8828|8995|9734|10512|10769|11151|23604|27086|29126|55604|57381|57715|58191|6…	ABL1|BDKRB1|BMP4|C3AR1|CD47|CD74|CSF1|HBEGF|S1PR1|EDN1|ETS1|F2R|FGF2|FGF7|FLT1|GATA2|GPER1|GRB7|HAS2|HIF1A|HSPA5|ICAM1|IL1A|IL1B|IL6|CXCL8|IL12A|CXCL10|ITGA6|KIT|LAMC2|LGALS9|LYN|MMP9|MMP14|NEDD9|SERPINE1|PDGFRA|PIK3CD|PLAU|MAP2K3|LGMN|PTGS2|PTPRC|CCL3|CCL4|CCL5|CCL7|CCL8|CCL20|SNAI2|SMO|SNAI1|SOD2|SOX9|STAT5A|TNF|TNFAIP6|VEGFA|VEGFC|WNT5A|XBP1|SEMA3B|NR4A3|PLPP3|TNFRSF18|NRP2|TNFSF18|HDAC9|SEMA3…	-18	MyList
GO Biological Processes	19	GO:0009617	response to bacterium	19_GO:0044419 biological process involved in interspecies interaction between organisms	-21	2.8	11	30211	726	1550	104	6.7	0.64	19|25|133|445|623|717|718|834|1051|1437|1440|1594|1906|1948|2149|2207|2634|2643|2823|2919|2920|2921|3106|3133|3552|3553|3569|3575|3576|3592|3620|3627|3656|3663|3764|3965|4023|4067|4615|4790|4792|4793|4938|4939|4940|5054|5142|5606|5732|5734|5739|5743|6347|6348|6352|6364|6372|6373|6374|6648|7098|7124|7128|7133|7292|7412|7474|7494|7855|8564|8767|9636|10133|10318|10333|10458|10561|10616|11009|26191|2…	ABCA1|ABL1|ADM|ASS1|BDKRB1|C2|C3|CASP1|CEBPB|CSF2|CSF3|CYP27B1|EDN1|EFNB2|F2R|FCER1G|GBP2|GCH1|GPM6A|CXCL1|CXCL2|CXCL3|HLA-B|HLA-E|IL1A|IL1B|IL6|IL7R|CXCL8|IL12A|IDO1|CXCL10|IRAK2|IRF5|KCNJ8|LGALS9|LPL|LYN|MYD88|NFKB1|NFKBIA|NFKBIB|OAS1|OAS2|OAS3|SERPINE1|PDE4B|MAP2K3|PTGER2|PTGER4|PTGIR|PTGS2|CCL2|CCL3|CCL5|CCL20|CXCL6|CXCL11|CXCL5|SOD2|TLR3|TNF|TNFAIP3|TNFRSF1B|TNFSF4|VCAM1|WNT5A|XBP1|FZD5|KMO|…	-18	MyList
GO Biological Processes	19	GO:0048514	blood vessel morphogenesis	19_GO:0032502 developmental process	-21	3.5	12	30211	419	1550	75	4.8	0.55	133|634|639|652|947|1000|1890|1901|1906|1942|1948|2049|2050|2069|2247|2321|2624|2637|2683|2697|3037|3091|3198|3200|3204|3397|3576|3674|3696|3726|4015|4211|4223|4323|4814|5054|5156|5743|6091|6303|6347|6355|6608|7026|7127|7422|7424|7453|7477|7494|7855|8828|8862|9464|11082|23129|23251|23462|23670|28514|51752|54538|54567|57381|64218|79625|80149|83478|84830|84870|91010|93649|113026|154796|168667	ADM|CEACAM1|PRDM1|BMP4|CD34|CDH2|TYMP|S1PR1|EDN1|EFNA1|EFNB2|EPHB3|EPHB4|EREG|FGF2|FLT1|GATA2|GBX2|B4GALT1|GJA1|HAS2|HIF1A|HOXA1|HOXA3|HOXA7|ID1|CXCL8|ITGA2B|ITGB8|JUNB|LOX|MEIS1|MEOX2|MMP14|NINJ1|SERPINE1|PDGFRA|PTGS2|ROBO1|SAT1|CCL2|CCL8|SMO|NR2F2|TNFAIP2|VEGFA|VEGFC|WARS1|WNT7B|XBP1|FZD5|NRP2|APLN|HAND2|ESM1|PLXND1|MINAR1|HEY1|CEMIP2|DLL1|ERAP1|ROBO4|DLL4|RHOJ|SEMA4A|NDNF|ZC3H12A|ARHGAP24|ADTR…	-18	MyList
GO Biological Processes	19	GO:0008285	negative regulation of cell population proliferation	19_GO:0048519 negative regulation of biological process	-21	2.7	11	30211	784	1550	109	7	0.65	133|134|135|367|634|652|868|1028|1051|1594|1948|2069|2113|2149|2247|2321|2495|2624|2683|2852|2919|3430|3437|3552|3553|3569|3576|3592|3604|3620|3624|3659|3672|3965|3976|4067|4163|4654|4803|4824|5270|5364|5371|5468|5610|5739|5743|5744|5745|5916|5918|5920|6091|6347|6355|6591|6648|6662|6751|6772|6935|7023|7026|7043|7124|7128|7421|7453|7474|7855|7940|8200|8335|8862|9111|9294|9314|9536|9863|10019|10290…	ADM|ADORA1|ADORA2A|AR|CEACAM1|BMP4|CBLB|CDKN1C|CEBPB|CYP27B1|EFNB2|EREG|ETS1|F2R|FGF2|FLT1|FTH1|GATA2|B4GALT1|GPER1|CXCL1|IFI35|IFIT3|IL1A|IL1B|IL6|CXCL8|IL12A|TNFRSF9|IDO1|INHBA|IRF1|ITGA1|LGALS9|LIF|LYN|MCC|MYOD1|NGF|NKX3-1|SERPINE2|PLXNB1|PML|PPARG|EIF2AK2|PTGIR|PTGS2|PTHLH|PTH1R|RARG|RARRES1|PLAAT4|ROBO1|CCL2|CCL8|SNAI2|SOD2|SOX9|SSTR1|STAT1|ZEB1|TFAP4|NR2F2|TGFB3|TNF|TNFAIP3|VDR|WARS1|WNT5A|…	-18	MyList
GO Biological Processes	19	GO:0050727	regulation of inflammatory response	19_GO:0050896 response to stimulus	-20	3.6	12	30211	394	1550	72	4.6	0.53	134|135|329|330|718|834|837|961|1051|1540|1588|2113|2161|2852|3133|3430|3553|3569|3620|3818|4023|4067|4314|4318|4615|4790|4792|4814|5054|5468|5734|5743|5788|6288|6348|6352|7098|7124|7128|7130|7133|7292|7474|9021|9111|9180|9314|9536|10318|10769|11274|11277|11343|27086|27178|51284|51704|51738|56833|64332|79651|81030|81792|84630|90865|114548|144811|145581|284467|338322|407006|730249	ADORA1|ADORA2A|BIRC2|BIRC3|C3|CASP1|CASP4|CD47|CEBPB|CYLD|CYP19A1|ETS1|F12|GPER1|HLA-E|IFI35|IL1B|IL6|IDO1|KLKB1|LPL|LYN|MMP3|MMP9|MYD88|NFKB1|NFKBIA|NINJ1|SERPINE1|PPARG|PTGER4|PTGS2|PTPRC|SAA1|CCL3|CCL5|TLR3|TNF|TNFAIP3|TNFAIP6|TNFRSF1B|TNFSF4|WNT5A|SOCS3|NMI|OSMR|KLF4|PTGES|TNIP1|PLK2|USP18|TREX1|MGLL|FOXP1|IL37|TLR7|GPRC5B|GHRL|SLAMF8|NFKBIZ|RHBDF2|ZBP1|ADAMTS12|TTBK1|IL33|NLRP3|LACC1|LRFN5|T…	-18	MyList
WikiPathways	27	WP5088	Prostaglandin signaling		-20	13	16	30211	33	1550	22	1.4	0.3	196|374|834|1435|2919|3552|3553|3569|3576|3592|3627|3665|4318|4790|5732|5734|6347|6348|7124|7422|9536|114548	AHR|AREG|CASP1|CSF1|CXCL1|IL1A|IL1B|IL6|CXCL8|IL12A|CXCL10|IRF7|MMP9|NFKB1|PTGER2|PTGER4|CCL2|CCL3|TNF|VEGFA|PTGES|NLRP3	-18	MyList
GO Biological Processes	19	GO:0048568	embryonic organ development	19_GO:0032502 developmental process	-20	3.4	12	30211	446	1550	77	5	0.55	133|220|579|639|652|668|1028|1051|1437|1906|1942|2295|2323|2535|2624|2637|2668|2697|2735|2736|3091|3142|3198|3200|3201|3202|3203|3204|3205|3215|3221|3235|3398|3399|3481|3576|3726|3815|3880|3976|4237|4323|5013|5087|5156|5357|5916|6474|6608|6615|6662|6665|6911|6935|7026|7043|7124|7422|7474|7477|7855|7942|9021|9464|10019|10194|23462|26018|28514|55897|65009|84870|91461|113026|116039|130497|157506	ADM|ALDH1A3|NKX3-2|PRDM1|BMP4|FOXL2|CDKN1C|CEBPB|CSF2|EDN1|EFNA1|FOXF2|FLT3LG|FZD2|GATA2|GBX2|GDNF|GJA1|GLI1|GLI2|HIF1A|HLX|HOXA1|HOXA3|HOXA4|HOXA5|HOXA6|HOXA7|HOXA9|HOXB5|HOXC4|HOXD9|ID2|ID3|IGF2|CXCL8|JUNB|KIT|KRT19|LIF|MFAP2|MMP14|OTX1|PBX1|PDGFRA|PLS1|RARG|SHOX2|SMO|SNAI1|SOX9|SOX15|TBX6|ZEB1|NR2F2|TGFB3|TNF|VEGFA|WNT5A|WNT7B|FZD5|TFEB|SOCS3|HAND2|SH2B3|TSHZ1|HEY1|LRIG1|DLL1|MESP1|NDRG4|RSPO3…	-18	MyList
GO Biological Processes	19	GO:2000147	positive regulation of cell motility	19_GO:0040011 locomotion	-20	3	11	30211	584	1550	89	5.7	0.59	25|623|652|719|961|972|1435|1839|1901|1906|2113|2149|2247|2252|2321|2624|2852|2886|3037|3091|3309|3383|3552|3553|3569|3576|3592|3627|3655|3815|3918|3965|4067|4318|4323|4739|5054|5156|5293|5328|5606|5641|5743|5788|6348|6351|6352|6354|6355|6364|6591|6608|6615|6648|6662|6776|7124|7130|7422|7424|7474|7494|7869|8013|8613|8784|8828|8995|9734|10512|10769|11151|23604|27086|29126|55604|57381|57715|58191|6…	ABL1|BDKRB1|BMP4|C3AR1|CD47|CD74|CSF1|HBEGF|S1PR1|EDN1|ETS1|F2R|FGF2|FGF7|FLT1|GATA2|GPER1|GRB7|HAS2|HIF1A|HSPA5|ICAM1|IL1A|IL1B|IL6|CXCL8|IL12A|CXCL10|ITGA6|KIT|LAMC2|LGALS9|LYN|MMP9|MMP14|NEDD9|SERPINE1|PDGFRA|PIK3CD|PLAU|MAP2K3|LGMN|PTGS2|PTPRC|CCL3|CCL4|CCL5|CCL7|CCL8|CCL20|SNAI2|SMO|SNAI1|SOD2|SOX9|STAT5A|TNF|TNFAIP6|VEGFA|VEGFC|WNT5A|XBP1|SEMA3B|NR4A3|PLPP3|TNFRSF18|NRP2|TNFSF18|HDAC9|SEMA3…	-17	MyList
KEGG Pathway	24	hsa05200	Pathways in cancer		-20	3.1	11	30211	531	1550	84	5.4	0.58	25|329|330|367|623|624|637|652|840|861|999|1647|1906|2113|2149|2247|2252|2308|2323|2535|2735|2736|2941|3091|3455|3460|3481|3569|3574|3575|3576|3592|3594|3601|3655|3674|3714|3718|3815|3909|3911|3914|3918|4286|4312|4318|4790|4791|4792|4824|5156|5293|5330|5337|5371|5468|5732|5734|5743|5900|6513|6608|6772|6773|6775|6776|7043|7185|7422|7424|7474|7477|7855|10235|11040|23236|23462|23604|27006|28514|5456…	ABL1|BIRC2|BIRC3|AR|BDKRB1|BDKRB2|BID|BMP4|CASP7|RUNX1|CDH1|GADD45A|EDN1|ETS1|F2R|FGF2|FGF7|FOXO1|FLT3LG|FZD2|GLI1|GLI2|GSTA4|HIF1A|IFNAR2|IFNGR2|IGF2|IL6|IL7|IL7R|CXCL8|IL12A|IL12RB1|IL15RA|ITGA6|ITGA2B|JAG2|JAK3|KIT|LAMA3|LAMA5|LAMB3|LAMC2|MITF|MMP1|MMP9|NFKB1|NFKB2|NFKBIA|NKX3-1|PDGFRA|PIK3CD|PLCB2|PLD1|PML|PPARG|PTGER2|PTGER4|PTGS2|RALGDS|SLC2A1|SMO|STAT1|STAT2|STAT4|STAT5A|TGFB3|TRAF1|VEGFA|…	-17	MyList
GO Biological Processes	19	GO:0051272	positive regulation of cellular component movement	19_GO:0051179 localization	-20	2.9	11	30211	596	1550	90	5.8	0.59	25|623|652|719|961|972|1435|1839|1901|1906|2113|2149|2247|2252|2321|2624|2852|2886|3037|3091|3309|3383|3552|3553|3569|3576|3592|3627|3655|3815|3918|3965|4067|4318|4323|4739|5054|5156|5293|5328|5606|5641|5743|5788|6348|6351|6352|6354|6355|6364|6591|6608|6615|6648|6662|6776|7124|7130|7422|7424|7474|7494|7869|8013|8613|8784|8828|8995|9734|10512|10769|11151|23604|27086|29126|55604|57381|57715|58191|6…	ABL1|BDKRB1|BMP4|C3AR1|CD47|CD74|CSF1|HBEGF|S1PR1|EDN1|ETS1|F2R|FGF2|FGF7|FLT1|GATA2|GPER1|GRB7|HAS2|HIF1A|HSPA5|ICAM1|IL1A|IL1B|IL6|CXCL8|IL12A|CXCL10|ITGA6|KIT|LAMC2|LGALS9|LYN|MMP9|MMP14|NEDD9|SERPINE1|PDGFRA|PIK3CD|PLAU|MAP2K3|LGMN|PTGS2|PTPRC|CCL3|CCL4|CCL5|CCL7|CCL8|CCL20|SNAI2|SMO|SNAI1|SOD2|SOX9|STAT5A|TNF|TNFAIP6|VEGFA|VEGFC|WNT5A|XBP1|SEMA3B|NR4A3|PLPP3|TNFRSF18|NRP2|TNFSF18|HDAC9|SEMA3…	-17	MyList
GO Biological Processes	19	GO:0050863	regulation of T cell activation	19_GO:0002376 immune system process	-19	3.7	12	30211	342	1550	65	4.2	0.51	25|135|634|639|652|861|868|961|972|1051|1326|1803|1948|2736|3112|3133|3142|3481|3552|3553|3569|3574|3575|3592|3594|3620|3659|3718|3902|3965|4067|5788|6347|6352|6666|6935|7133|7292|7412|7494|8767|8876|8995|9308|9580|9760|10148|10385|10673|11151|11277|23149|23308|26191|27242|29126|57829|64115|64332|80149|80380|114548|259307|282618|283234	ABL1|ADORA2A|CEACAM1|PRDM1|BMP4|RUNX1|CBLB|CD47|CD74|CEBPB|MAP3K8|DPP4|EFNB2|GLI2|HLA-DOB|HLA-E|HLX|IGF2|IL1A|IL1B|IL6|IL7|IL7R|IL12A|IL12RB1|IDO1|IRF1|JAK3|LAG3|LGALS9|LYN|PTPRC|CCL2|CCL5|SOX12|ZEB1|TNFRSF1B|TNFSF4|VCAM1|XBP1|RIPK2|VNN1|TNFSF18|CD83|SOX13|TOX|EBI3|BTN2A2|TNFSF13B|CORO1A|TREX1|FCHO1|ICOSLG|PTPN22|TNFRSF21|CD274|ZP4|VSIR|NFKBIZ|ZC3H12A|PDCD1LG2|NLRP3|IL4I1|IFNL1|CCDC88B	-17	MyList
GO Biological Processes	19	GO:0034612	response to tumor necrosis factor	19_GO:0050896 response to stimulus	-19	4.7	12	30211	202	1550	49	3.2	0.44	329|330|445|1116|1906|2633|2634|2635|2643|2852|3037|3576|3875|3899|4155|4217|4654|4790|4792|4824|5743|6347|6348|6351|6352|6354|6355|6364|6772|7124|7133|7185|7412|8531|8718|8784|8995|9447|10673|27063|27242|51667|55022|55504|58191|60401|80149|81792|730249	BIRC2|BIRC3|ASS1|CHI3L1|EDN1|GBP1|GBP2|GBP3|GCH1|GPER1|HAS2|CXCL8|KRT18|AFF3|MBP|MAP3K5|MYOD1|NFKB1|NFKBIA|NKX3-1|PTGS2|CCL2|CCL3|CCL4|CCL5|CCL7|CCL8|CCL20|STAT1|TNF|TNFRSF1B|TRAF1|VCAM1|YBX3|TNFRSF25|TNFRSF18|TNFSF18|AIM2|TNFSF13B|ANKRD1|TNFRSF21|NUB1|PID1|TNFRSF19|CXCL16|EDA2R|ZC3H12A|ADAMTS12|ACOD1	-17	MyList
WikiPathways	27	WP5095	Overview of proinflammatory and profibrotic mediators		-19	5.9	13	30211	129	1550	39	2.5	0.4	374|1435|1437|1440|2919|2920|2921|3552|3553|3569|3574|3576|3589|3592|3627|3976|4312|4314|4318|4790|6347|6348|6351|6352|6354|6355|6364|6372|6373|6374|7124|7422|10148|10673|11009|27178|58191|90865|282618	AREG|CSF1|CSF2|CSF3|CXCL1|CXCL2|CXCL3|IL1A|IL1B|IL6|IL7|CXCL8|IL11|IL12A|CXCL10|LIF|MMP1|MMP3|MMP9|NFKB1|CCL2|CCL3|CCL4|CCL5|CCL7|CCL8|CCL20|CXCL6|CXCL11|CXCL5|TNF|VEGFA|EBI3|TNFSF13B|IL24|IL37|CXCL16|IL33|IFNL1	-17	MyList
GO Biological Processes	19	GO:0001775	cell activation	19_GO:0009987 cellular process	-19	2.9	11	30211	636	1550	93	6	0.6	25|135|684|868|960|972|1435|1437|1607|1803|1906|2149|2151|2207|2697|3133|3205|3383|3430|3460|3553|3569|3574|3575|3576|3589|3627|3659|3696|3714|3718|3815|3902|3936|4067|4189|4615|4683|4791|5087|5156|5293|5359|5699|5734|5788|5971|6288|6348|6352|6372|6608|7098|7124|7292|7412|7462|7855|8013|8767|8995|9111|9162|9580|9734|9760|10014|10148|10333|10397|10673|11119|11151|11277|23236|23308|26191|27086|2851…	ABL1|ADORA2A|BST2|CBLB|CD44|CD74|CSF1|CSF2|DGKB|DPP4|EDN1|F2R|F2RL2|FCER1G|GJA1|HLA-E|HOXA9|ICAM1|IFI35|IFNGR2|IL1B|IL6|IL7|IL7R|CXCL8|IL11|CXCL10|IRF1|ITGB8|JAG2|JAK3|KIT|LAG3|LCP1|LYN|DNAJB9|MYD88|NBN|NFKB2|PBX1|PDGFRA|PIK3CD|PLSCR1|PSMB10|PTGER4|PTPRC|RELB|SAA1|CCL3|CCL5|CXCL6|SMO|TLR3|TNF|TNFSF4|VCAM1|LAT2|FZD5|NR4A3|RIPK2|TNFSF18|NMI|DGKI|SOX13|HDAC9|TOX|HDAC5|EBI3|TLR6|NDRG1|TNFSF13B|BTN3A1…	-17	MyList
GO Biological Processes	19	GO:0006935	chemotaxis	19_GO:0040011 locomotion	-19	3.1	11	30211	506	1550	81	5.2	0.57	627|652|719|1803|1839|1890|1901|1906|1942|1948|2044|2049|2050|2115|2207|2247|2252|2321|2637|2668|2736|2919|2920|2921|3053|3084|3553|3569|3576|3627|3672|3798|3815|3909|3911|3918|3965|4015|4814|4917|5142|5156|5293|5328|5329|5337|5364|5800|6091|6288|6347|6348|6351|6352|6354|6355|6364|6372|6373|6374|6608|7412|7422|7424|7474|7869|8577|8828|10512|11151|23129|51554|54538|56833|56956|57449|57715|58191|64…	BDNF|BMP4|C3AR1|DPP4|HBEGF|TYMP|S1PR1|EDN1|EFNA1|EFNB2|EPHA5|EPHB3|EPHB4|ETV1|FCER1G|FGF2|FGF7|FLT1|GBX2|GDNF|GLI2|CXCL1|CXCL2|CXCL3|SERPIND1|NRG1|IL1B|IL6|CXCL8|CXCL10|ITGA1|KIF5A|KIT|LAMA3|LAMA5|LAMC2|LGALS9|LOX|NINJ1|NTN3|PDE4B|PDGFRA|PIK3CD|PLAU|PLAUR|PLD1|PLXNB1|PTPRO|ROBO1|SAA1|CCL2|CCL3|CCL4|CCL5|CCL7|CCL8|CCL20|CXCL6|CXCL11|CXCL5|SMO|VCAM1|VEGFA|VEGFC|WNT5A|SEMA3B|TMEFF1|NRP2|SEMA3C|CORO1…	-17	MyList
GO Biological Processes	19	GO:0032102	negative regulation of response to external stimulus	19_GO:0048519 negative regulation of biological process	-19	3.3	11	30211	427	1550	73	4.7	0.54	18|103|134|135|634|947|1588|1803|1906|2161|2247|2852|3106|3133|3134|3428|3818|3965|4067|4321|4790|4938|4940|5054|5055|5156|5270|5328|5468|5734|5788|5800|6091|6288|6318|6347|6737|6773|7124|7128|7130|7133|7474|7869|9021|9111|9314|9636|10019|10475|10512|10769|10906|11274|11277|25939|51738|54625|56833|57715|64218|65078|79132|79651|84830|114548|114769|114897|145581|223117|284467|407006|730249	ABAT|ADAR|ADORA1|ADORA2A|CEACAM1|CD34|CYP19A1|DPP4|EDN1|F12|FGF2|GPER1|HLA-B|HLA-E|HLA-F|IFI16|KLKB1|LGALS9|LYN|MMP12|NFKB1|OAS1|OAS3|SERPINE1|SERPINB2|PDGFRA|SERPINE2|PLAU|PPARG|PTGER4|PTPRC|PTPRO|ROBO1|SAA1|SERPINB4|CCL2|TRIM21|STAT2|TNF|TNFAIP3|TNFAIP6|TNFRSF1B|WNT5A|SEMA3B|SOCS3|NMI|KLF4|ISG15|SH2B3|TRIM38|SEMA3C|PLK2|TRAFD1|USP18|TREX1|SAMHD1|GHRL|PARP14|SLAMF8|SEMA4G|SEMA4A|RTN4R|DHX58|RHBD…	-16	MyList
GO Biological Processes	19	GO:0042330	taxis	19_GO:0040011 locomotion	-19	3.1	11	30211	510	1550	81	5.2	0.57	627|652|719|1803|1839|1890|1901|1906|1942|1948|2044|2049|2050|2115|2207|2247|2252|2321|2637|2668|2736|2919|2920|2921|3053|3084|3553|3569|3576|3627|3672|3798|3815|3909|3911|3918|3965|4015|4814|4917|5142|5156|5293|5328|5329|5337|5364|5800|6091|6288|6347|6348|6351|6352|6354|6355|6364|6372|6373|6374|6608|7412|7422|7424|7474|7869|8577|8828|10512|11151|23129|51554|54538|56833|56956|57449|57715|58191|64…	BDNF|BMP4|C3AR1|DPP4|HBEGF|TYMP|S1PR1|EDN1|EFNA1|EFNB2|EPHA5|EPHB3|EPHB4|ETV1|FCER1G|FGF2|FGF7|FLT1|GBX2|GDNF|GLI2|CXCL1|CXCL2|CXCL3|SERPIND1|NRG1|IL1B|IL6|CXCL8|CXCL10|ITGA1|KIF5A|KIT|LAMA3|LAMA5|LAMC2|LGALS9|LOX|NINJ1|NTN3|PDE4B|PDGFRA|PIK3CD|PLAU|PLAUR|PLD1|PLXNB1|PTPRO|ROBO1|SAA1|CCL2|CCL3|CCL4|CCL5|CCL7|CCL8|CCL20|CXCL6|CXCL11|CXCL5|SMO|VCAM1|VEGFA|VEGFC|WNT5A|SEMA3B|TMEFF1|NRP2|SEMA3C|CORO1…	-16	MyList
GO Biological Processes	19	GO:0001525	angiogenesis	19_GO:0032502 developmental process	-19	3.8	12	30211	321	1550	62	4	0.5	634|652|947|1890|1901|1906|1942|1948|2049|2050|2069|2247|2321|2624|2637|2683|3091|3200|3204|3397|3576|3674|4211|4223|4323|4814|5054|5156|5743|6091|6303|6347|6355|7127|7422|7424|7453|7494|7855|8828|8862|9464|11082|23129|23251|23462|23670|28514|51752|54538|54567|57381|64218|79625|80149|83478|84830|84870|91010|113026|154796|168667	CEACAM1|BMP4|CD34|TYMP|S1PR1|EDN1|EFNA1|EFNB2|EPHB3|EPHB4|EREG|FGF2|FLT1|GATA2|GBX2|B4GALT1|HIF1A|HOXA3|HOXA7|ID1|CXCL8|ITGA2B|MEIS1|MEOX2|MMP14|NINJ1|SERPINE1|PDGFRA|PTGS2|ROBO1|SAT1|CCL2|CCL8|TNFAIP2|VEGFA|VEGFC|WARS1|XBP1|FZD5|NRP2|APLN|HAND2|ESM1|PLXND1|MINAR1|HEY1|CEMIP2|DLL1|ERAP1|ROBO4|DLL4|RHOJ|SEMA4A|NDNF|ZC3H12A|ARHGAP24|ADTRP|RSPO3|FMNL3|PLCD3|AMOT|BMPER	-16	MyList
GO Biological Processes	19	GO:0048598	embryonic morphogenesis	19_GO:0032502 developmental process	-19	2.9	11	30211	576	1550	87	5.6	0.58	25|133|220|579|652|668|1028|1294|1846|1906|1942|2114|2247|2295|2321|2535|2624|2637|2668|2697|2735|2736|3091|3142|3198|3200|3201|3202|3203|3204|3205|3206|3215|3221|3235|3357|3398|3481|3624|3679|3714|3899|3909|3911|3914|4237|4318|4323|5013|5087|5156|5357|5916|6474|6608|6615|6662|6911|6935|7043|7424|7474|7477|7855|8013|8091|8200|8862|9021|9314|9464|10194|22943|23135|26018|28514|54567|55897|57619|650…	ABL1|ADM|ALDH1A3|NKX3-2|BMP4|FOXL2|CDKN1C|COL7A1|DUSP4|EDN1|EFNA1|ETS2|FGF2|FOXF2|FLT1|FZD2|GATA2|GBX2|GDNF|GJA1|GLI1|GLI2|HIF1A|HLX|HOXA1|HOXA3|HOXA4|HOXA5|HOXA6|HOXA7|HOXA9|HOXA10|HOXB5|HOXC4|HOXD9|HTR2B|ID2|IGF2|INHBA|ITGA7|JAG2|AFF3|LAMA3|LAMA5|LAMB3|MFAP2|MMP9|MMP14|OTX1|PBX1|PDGFRA|PLS1|RARG|SHOX2|SMO|SNAI1|SOX9|TBX6|ZEB1|TGFB3|VEGFC|WNT5A|WNT7B|FZD5|NR4A3|HMGA2|GDF5|APLN|SOCS3|KLF4|HAND2|T…	-16	MyList
GO Biological Processes	19	GO:0040017	positive regulation of locomotion	19_GO:0040011 locomotion	-19	2.9	11	30211	599	1550	89	5.7	0.59	25|623|652|719|961|972|1435|1839|1901|1906|2113|2149|2247|2252|2321|2624|2852|2886|3037|3091|3309|3383|3552|3553|3569|3576|3592|3627|3655|3815|3918|3965|4067|4318|4323|4739|5054|5156|5293|5328|5606|5641|5743|5788|6348|6351|6352|6354|6355|6364|6591|6608|6615|6648|6662|6776|7124|7130|7422|7424|7474|7494|7869|8013|8613|8784|8828|8995|9734|10512|10769|11151|23604|27086|29126|55604|57381|57715|58191|6…	ABL1|BDKRB1|BMP4|C3AR1|CD47|CD74|CSF1|HBEGF|S1PR1|EDN1|ETS1|F2R|FGF2|FGF7|FLT1|GATA2|GPER1|GRB7|HAS2|HIF1A|HSPA5|ICAM1|IL1A|IL1B|IL6|CXCL8|IL12A|CXCL10|ITGA6|KIT|LAMC2|LGALS9|LYN|MMP9|MMP14|NEDD9|SERPINE1|PDGFRA|PIK3CD|PLAU|MAP2K3|LGMN|PTGS2|PTPRC|CCL3|CCL4|CCL5|CCL7|CCL8|CCL20|SNAI2|SMO|SNAI1|SOD2|SOX9|STAT5A|TNF|TNFAIP6|VEGFA|VEGFC|WNT5A|XBP1|SEMA3B|NR4A3|PLPP3|TNFRSF18|NRP2|TNFSF18|HDAC9|SEMA3…	-16	MyList
Canonical Pathways	11	M5883	NABA SECRETED FACTORS		-19	3.6	11	30211	343	1550	64	4.1	0.51	374|627|652|685|1435|1437|1440|1839|1955|2069|2247|2252|2323|2668|2919|2920|2921|3084|3481|3552|3553|3569|3574|3576|3589|3592|3623|3624|3627|3976|4050|4803|6274|6347|6348|6351|6352|6354|6355|6364|6372|6373|6374|7043|7124|7292|7422|7424|7474|7477|8200|8743|8995|9244|10148|10673|11009|23452|27006|27178|143282|146433|387911|643866	AREG|BDNF|BMP4|BTC|CSF1|CSF2|CSF3|HBEGF|MEGF9|EREG|FGF2|FGF7|FLT3LG|GDNF|CXCL1|CXCL2|CXCL3|NRG1|IGF2|IL1A|IL1B|IL6|IL7|CXCL8|IL11|IL12A|INHA|INHBA|CXCL10|LIF|LTB|NGF|S100A3|CCL2|CCL3|CCL4|CCL5|CCL7|CCL8|CCL20|CXCL6|CXCL11|CXCL5|TGFB3|TNF|TNFSF4|VEGFA|VEGFC|WNT5A|WNT7B|GDF5|TNFSF10|TNFSF18|CRLF1|EBI3|TNFSF13B|IL24|ANGPTL2|FGF22|IL37|FGFBP3|IL34|C1QTNF9B|CBLN3	-16	MyList
GO Biological Processes	19	GO:0032103	positive regulation of response to external stimulus	19_GO:0048518 positive regulation of biological process	-19	3.3	11	30211	442	1550	74	4.8	0.54	661|718|719|834|961|972|1051|1435|1901|1906|2069|2113|2247|3133|3134|3428|3430|3553|3569|3576|3592|3620|3627|3665|3902|3965|4023|4067|4321|4792|4814|5054|5359|5641|5734|5743|6348|6351|6352|6354|7098|7124|7292|7422|7424|7474|8638|8767|9111|9180|9447|9641|10133|10318|23604|51284|51704|51738|55601|57169|64332|79132|81030|83666|84630|85363|90865|115362|117854|146433|284467|338322|407006|730249	POLR3D|C3|C3AR1|CASP1|CD47|CD74|CEBPB|CSF1|S1PR1|EDN1|EREG|ETS1|FGF2|HLA-E|HLA-F|IFI16|IFI35|IL1B|IL6|CXCL8|IL12A|IDO1|CXCL10|IRF7|LAG3|LGALS9|LPL|LYN|MMP12|NFKBIA|NINJ1|SERPINE1|PLSCR1|LGMN|PTGER4|PTGS2|CCL3|CCL4|CCL5|CCL7|TLR3|TNF|TNFSF4|VEGFA|VEGFC|WNT5A|OASL|RIPK2|NMI|OSMR|AIM2|IKBKE|OPTN|TNIP1|DAPK2|TLR7|GPRC5B|GHRL|DDX60|ZNFX1|NFKBIZ|DHX58|ZBP1|PARP9|TTBK1|TRIM5|IL33|GBP5|TRIM6|IL34|TAFA3|N…	-16	MyList
GO Biological Processes	19	GO:1903039	positive regulation of leukocyte cell-cell adhesion	19_GO:0022610 biological adhesion	-19	4.2	12	30211	245	1550	53	3.4	0.46	861|960|961|972|1326|1803|1948|2113|2736|3037|3112|3133|3142|3481|3552|3553|3569|3574|3575|3592|3594|3718|3965|4067|5788|6347|6352|6666|7124|7292|7412|7494|8013|8767|8876|9308|9435|9580|10148|10385|10673|11151|23149|23308|26191|29126|57829|64115|64332|80380|114548|259307|283234	RUNX1|CD44|CD47|CD74|MAP3K8|DPP4|EFNB2|ETS1|GLI2|HAS2|HLA-DOB|HLA-E|HLX|IGF2|IL1A|IL1B|IL6|IL7|IL7R|IL12A|IL12RB1|JAK3|LGALS9|LYN|PTPRC|CCL2|CCL5|SOX12|TNF|TNFSF4|VCAM1|XBP1|NR4A3|RIPK2|VNN1|CD83|CHST2|SOX13|EBI3|BTN2A2|TNFSF13B|CORO1A|FCHO1|ICOSLG|PTPN22|CD274|ZP4|VSIR|NFKBIZ|PDCD1LG2|NLRP3|IL4I1|CCDC88B	-16	MyList
GO Biological Processes	19	GO:0043122	regulation of I-kappaB kinase/NF-kappaB signaling	19_GO:0023052 signaling	-19	4.1	12	30211	254	1550	54	3.5	0.47	25|329|330|684|825|834|843|972|2149|2697|3357|3552|3553|3965|4615|4793|6398|6737|6772|7098|7124|7128|7185|7474|7706|8743|8767|8795|8837|9641|9830|10133|10318|10333|10346|10475|10616|10769|11040|24138|51523|51704|55504|57449|60401|79931|80149|80833|85363|92610|113277|114769|117854|257397	ABL1|BIRC2|BIRC3|BST2|CAPN3|CASP1|CASP10|CD74|F2R|GJA1|HTR2B|IL1A|IL1B|LGALS9|MYD88|NFKBIB|SECTM1|TRIM21|STAT1|TLR3|TNF|TNFAIP3|TRAF1|WNT5A|TRIM25|TNFSF10|RIPK2|TNFRSF10B|CFLAR|IKBKE|TRIM14|OPTN|TNIP1|TLR6|TRIM22|TRIM38|RBCK1|PLK2|PIM2|IFIT5|CXXC5|GPRC5B|TNFRSF19|PLEKHG5|EDA2R|TNIP3|ZC3H12A|APOL3|TRIM5|TIFA|TMEM106A|CARD16|TRIM6|TAB3	-16	MyList
GO Biological Processes	19	GO:0045596	negative regulation of cell differentiation	19_GO:0032502 developmental process	-18	2.7	11	30211	685	1550	96	6.2	0.61	19|374|579|627|634|652|859|861|972|1903|1942|2069|2301|2308|2624|2633|2852|3142|3202|3204|3205|3397|3398|3399|3481|3552|3553|3569|3623|3624|3627|3659|3718|3902|4067|4155|4211|4318|4320|4792|5087|5468|5744|5916|5997|5999|6348|6591|6608|6615|6648|6662|6772|6911|6935|7098|7124|7130|7292|7422|7424|7474|7494|7869|8111|8200|8359|9283|9464|10014|10512|22882|22943|23462|28514|28951|55553|55796|55897|5771…	ABCA1|AREG|NKX3-2|BDNF|CEACAM1|BMP4|CAV3|RUNX1|CD74|S1PR3|EFNA1|EREG|FOXE3|FOXO1|GATA2|GBP1|GPER1|HLX|HOXA5|HOXA7|HOXA9|ID1|ID2|ID3|IGF2|IL1A|IL1B|IL6|INHA|INHBA|CXCL10|IRF1|JAK3|LAG3|LYN|MBP|MEIS1|MMP9|MMP11|NFKBIA|PBX1|PPARG|PTHLH|RARG|RGS2|RGS4|CCL3|SNAI2|SMO|SNAI1|SOD2|SOX9|STAT1|TBX6|ZEB1|TLR3|TNF|TNFAIP6|TNFSF4|VEGFA|VEGFC|WNT5A|XBP1|SEMA3B|GPR68|GDF5|H4C1|GPR37L1|HAND2|HDAC5|SEMA3C|ZHX2|DK…	-16	MyList
GO Biological Processes	19	GO:0002694	regulation of leukocyte activation	19_GO:0002376 immune system process	-18	2.8	11	30211	629	1550	91	5.9	0.6	25|135|196|634|639|652|861|868|961|972|1051|1326|1803|1948|2624|2736|2852|3112|3133|3134|3142|3398|3481|3552|3553|3569|3574|3575|3592|3594|3598|3601|3620|3623|3624|3659|3718|3902|3965|4067|4323|4615|5359|5788|6347|6348|6352|6666|6935|7124|7128|7133|7292|7412|7474|7494|7940|8013|8767|8876|8995|9308|9473|9580|9760|10148|10333|10385|10673|11151|11277|23149|23308|26191|27242|29126|56833|57829|64115|6…	ABL1|ADORA2A|AHR|CEACAM1|PRDM1|BMP4|RUNX1|CBLB|CD47|CD74|CEBPB|MAP3K8|DPP4|EFNB2|GATA2|GLI2|GPER1|HLA-DOB|HLA-E|HLA-F|HLX|ID2|IGF2|IL1A|IL1B|IL6|IL7|IL7R|IL12A|IL12RB1|IL13RA2|IL15RA|IDO1|INHA|INHBA|IRF1|JAK3|LAG3|LGALS9|LYN|MMP14|MYD88|PLSCR1|PTPRC|CCL2|CCL3|CCL5|SOX12|ZEB1|TNF|TNFAIP3|TNFRSF1B|TNFSF4|VCAM1|WNT5A|XBP1|LST1|NR4A3|RIPK2|VNN1|TNFSF18|CD83|THEMIS2|SOX13|TOX|EBI3|TLR6|BTN2A2|TNFSF13B…	-16	MyList
GO Biological Processes	19	GO:0022409	positive regulation of cell-cell adhesion	19_GO:0022610 biological adhesion	-18	3.9	11	30211	291	1550	58	3.7	0.48	861|960|961|972|1326|1803|1948|2113|2736|3037|3112|3133|3142|3481|3552|3553|3569|3574|3575|3592|3594|3718|3965|4067|4651|5329|5788|6347|6352|6666|7124|7292|7412|7474|7494|8013|8613|8767|8876|9223|9308|9435|9580|10148|10385|10673|11151|23149|23308|26191|29126|57829|64115|64332|80380|114548|259307|283234	RUNX1|CD44|CD47|CD74|MAP3K8|DPP4|EFNB2|ETS1|GLI2|HAS2|HLA-DOB|HLA-E|HLX|IGF2|IL1A|IL1B|IL6|IL7|IL7R|IL12A|IL12RB1|JAK3|LGALS9|LYN|MYO10|PLAUR|PTPRC|CCL2|CCL5|SOX12|TNF|TNFSF4|VCAM1|WNT5A|XBP1|NR4A3|PLPP3|RIPK2|VNN1|MAGI1|CD83|CHST2|SOX13|EBI3|BTN2A2|TNFSF13B|CORO1A|FCHO1|ICOSLG|PTPN22|CD274|ZP4|VSIR|NFKBIZ|PDCD1LG2|NLRP3|IL4I1|CCDC88B	-16	MyList
WikiPathways	27	WP3617	Photodynamic therapy-induced NF-kB survival signaling		-18	12	15	30211	35	1550	21	1.4	0.29	329|330|597|1437|2920|3383|3552|3553|3569|3576|4312|4314|4318|4790|4791|5743|5971|7124|7412|7422|8837	BIRC2|BIRC3|BCL2A1|CSF2|CXCL2|ICAM1|IL1A|IL1B|IL6|CXCL8|MMP1|MMP3|MMP9|NFKB1|NFKB2|PTGS2|RELB|TNF|VCAM1|VEGFA|CFLAR	-16	MyList
KEGG Pathway	24	hsa04621	NOD-like receptor signaling pathway		-18	4.8	12	30211	184	1550	45	2.9	0.43	329|330|834|837|2633|2634|2635|2919|2920|2921|3428|3455|3553|3569|3576|3665|3709|4615|4790|4792|4793|4938|4939|4940|5330|6347|6352|6772|6773|7124|7128|8767|9447|9641|10135|10616|10628|23236|24145|84674|114548|114769|115361|115362|257397	BIRC2|BIRC3|CASP1|CASP4|GBP1|GBP2|GBP3|CXCL1|CXCL2|CXCL3|IFI16|IFNAR2|IL1B|IL6|CXCL8|IRF7|ITPR2|MYD88|NFKB1|NFKBIA|NFKBIB|OAS1|OAS2|OAS3|PLCB2|CCL2|CCL5|STAT1|STAT2|TNF|TNFAIP3|RIPK2|AIM2|IKBKE|NAMPT|RBCK1|TXNIP|PLCB1|PANX1|CARD6|NLRP3|CARD16|GBP4|GBP5|TAB3	-16	MyList
GO Biological Processes	19	GO:0043410	positive regulation of MAPK cascade	19_GO:0023052 signaling	-18	3.1	11	30211	490	1550	77	5	0.55	25|134|146|367|652|960|972|1000|1116|1647|1906|1942|2081|2149|2247|2321|2852|3084|3357|3383|3481|3552|3553|3569|3589|3672|3815|3965|3976|4217|4615|5156|5606|5610|5788|6091|6347|6348|6351|6352|6354|6355|6364|7043|7098|7124|7185|7422|7474|7477|7855|8767|8837|8844|9283|9464|10333|10347|22943|23236|23286|26191|50507|51738|55504|60370|60401|65009|80149|85363|113277|114897|146433|153769|168667|344558|4…	ABL1|ADORA1|ADRA1D|AR|BMP4|CD44|CD74|CDH2|CHI3L1|GADD45A|EDN1|EFNA1|ERN1|F2R|FGF2|FLT1|GPER1|NRG1|HTR2B|ICAM1|IGF2|IL1A|IL1B|IL6|IL11|ITGA1|KIT|LGALS9|LIF|MAP3K5|MYD88|PDGFRA|MAP2K3|EIF2AK2|PTPRC|ROBO1|CCL2|CCL3|CCL4|CCL5|CCL7|CCL8|CCL20|TGFB3|TLR3|TNF|TRAF1|VEGFA|WNT5A|WNT7B|FZD5|RIPK2|CFLAR|KSR1|GPR37L1|HAND2|TLR6|ABCA7|DKK1|PLCB1|WWC1|PTPN22|NOX4|GHRL|TNFRSF19|AVPI1|EDA2R|NDRG4|ZC3H12A|TRIM5|T…	-15	MyList
KEGG Pathway	24	hsa05164	Influenza A		-18	4.9	12	30211	171	1550	43	2.8	0.42	103|637|834|3112|3383|3455|3460|3552|3553|3569|3576|3592|3627|3665|4599|4600|4615|4790|4792|4793|4938|4939|4940|5293|5371|5610|6347|6352|6772|6773|7098|7124|7706|8743|8795|9021|9641|23586|51284|64135|90865|91543|114548	ADAR|BID|CASP1|HLA-DOB|ICAM1|IFNAR2|IFNGR2|IL1A|IL1B|IL6|CXCL8|IL12A|CXCL10|IRF7|MX1|MX2|MYD88|NFKB1|NFKBIA|NFKBIB|OAS1|OAS2|OAS3|PIK3CD|PML|EIF2AK2|CCL2|CCL5|STAT1|STAT2|TLR3|TNF|TRIM25|TNFSF10|TNFRSF10B|SOCS3|IKBKE|DDX58|TLR7|IFIH1|IL33|RSAD2|NLRP3	-15	MyList
GO Biological Processes	19	GO:0043408	regulation of MAPK cascade	19_GO:0023052 signaling	-17	2.7	10	30211	686	1550	94	6.1	0.61	25|134|146|367|467|634|652|859|960|972|1000|1116|1540|1647|1846|1850|1906|1942|2081|2149|2247|2308|2321|2633|2852|3084|3357|3383|3481|3552|3553|3569|3589|3672|3815|3965|3976|4067|4217|4615|5156|5468|5606|5610|5788|5997|6091|6347|6348|6351|6352|6354|6355|6364|7043|7098|7124|7185|7422|7474|7477|7855|8000|8767|8837|8844|9283|9464|10019|10318|10333|10347|10385|10636|22943|23236|23286|26191|50507|5173…	ABL1|ADORA1|ADRA1D|AR|ATF3|CEACAM1|BMP4|CAV3|CD44|CD74|CDH2|CHI3L1|CYLD|GADD45A|DUSP4|DUSP8|EDN1|EFNA1|ERN1|F2R|FGF2|FOXO1|FLT1|GBP1|GPER1|NRG1|HTR2B|ICAM1|IGF2|IL1A|IL1B|IL6|IL11|ITGA1|KIT|LGALS9|LIF|LYN|MAP3K5|MYD88|PDGFRA|PPARG|MAP2K3|EIF2AK2|PTPRC|RGS2|ROBO1|CCL2|CCL3|CCL4|CCL5|CCL7|CCL8|CCL20|TGFB3|TLR3|TNF|TRAF1|VEGFA|WNT5A|WNT7B|FZD5|PSCA|RIPK2|CFLAR|KSR1|GPR37L1|HAND2|SH2B3|TNIP1|TLR6|ABC…	-15	MyList
WikiPathways	27	WP5087	Malignant pleural mesothelioma		-17	3.1	11	30211	447	1550	72	4.6	0.53	374|467|627|685|834|960|961|999|1000|1008|1016|1435|1437|1440|1839|1942|2247|2252|2308|2321|2323|2535|2919|3091|3481|3553|3569|3620|3627|3655|3672|3815|3909|3911|3914|3918|3965|4217|4314|4318|4323|4790|4803|5156|5163|5293|5328|5563|5606|6195|6347|6351|6352|6374|6513|6772|7422|7424|7474|7477|7855|8045|10397|22943|23286|27006|27123|29126|114548|146433|154796|102800317	AREG|ATF3|BDNF|BTC|CASP1|CD44|CD47|CDH1|CDH2|CDH10|CDH18|CSF1|CSF2|CSF3|HBEGF|EFNA1|FGF2|FGF7|FOXO1|FLT1|FLT3LG|FZD2|CXCL1|HIF1A|IGF2|IL1B|IL6|IDO1|CXCL10|ITGA6|ITGA1|KIT|LAMA3|LAMA5|LAMB3|LAMC2|LGALS9|MAP3K5|MMP3|MMP9|MMP14|NFKB1|NGF|PDGFRA|PDK1|PIK3CD|PLAU|PRKAA2|MAP2K3|RPS6KA1|CCL2|CCL4|CCL5|CXCL5|SLC2A1|STAT1|VEGFA|VEGFC|WNT5A|WNT7B|FZD5|RASSF7|NDRG1|DKK1|WWC1|FGF22|DKK2|CD274|NLRP3|IL34|AMOT…	-15	MyList
GO Biological Processes	19	GO:0034341	response to interferon-gamma	19_GO:0044419 biological process involved in interspecies interaction between organisms	-17	5.7	12	30211	124	1550	36	2.3	0.38	445|684|834|961|972|1594|1906|2633|2634|2635|2643|3594|3659|3965|6347|6348|6351|6352|6354|6355|6364|6672|6737|6772|7098|7124|7474|8942|9111|51667|55337|58191|115361|115362|338382|730249	ASS1|BST2|CASP1|CD47|CD74|CYP27B1|EDN1|GBP1|GBP2|GBP3|GCH1|IL12RB1|IRF1|LGALS9|CCL2|CCL3|CCL4|CCL5|CCL7|CCL8|CCL20|SP100|TRIM21|STAT1|TLR3|TNF|WNT5A|KYNU|NMI|NUB1|SHFL|CXCL16|GBP4|GBP5|RAB7B|ACOD1	-15	MyList
GO Biological Processes	19	GO:0048525	negative regulation of viral process	19_GO:0016032 viral process	-17	6.6	13	30211	91	1550	31	2	0.36	684|3428|3434|3669|4599|4938|4939|4940|5359|5610|5806|6352|6737|6772|7124|7706|8091|8638|9636|9830|10318|24138|55337|57169|60489|64135|84875|85363|91543|117854|200316	BST2|IFI16|IFIT1|ISG20|MX1|OAS1|OAS2|OAS3|PLSCR1|EIF2AK2|PTX3|CCL5|TRIM21|STAT1|TNF|TRIM25|HMGA2|OASL|ISG15|TRIM14|TNIP1|IFIT5|SHFL|ZNFX1|APOBEC3G|IFIH1|PARP10|TRIM5|RSAD2|TRIM6|APOBEC3F	-15	MyList
GO Biological Processes	19	GO:1903900	regulation of viral life cycle	19_GO:0016032 viral process	-17	5.3	12	30211	139	1550	38	2.5	0.39	103|684|972|3428|3434|3576|3669|3965|4599|4938|4939|4940|5359|5610|5806|6352|6737|7124|7706|8091|8638|9636|9830|10318|10346|10475|24138|27074|55337|57169|60489|64135|84875|85363|91543|117854|200316|222537	ADAR|BST2|CD74|IFI16|IFIT1|CXCL8|ISG20|LGALS9|MX1|OAS1|OAS2|OAS3|PLSCR1|EIF2AK2|PTX3|CCL5|TRIM21|TNF|TRIM25|HMGA2|OASL|ISG15|TRIM14|TNIP1|TRIM22|TRIM38|IFIT5|LAMP3|SHFL|ZNFX1|APOBEC3G|IFIH1|PARP10|TRIM5|RSAD2|TRIM6|APOBEC3F|HS3ST5	-15	MyList
GO Biological Processes	19	GO:0071356	cellular response to tumor necrosis factor	19_GO:0050896 response to stimulus	-17	4.7	12	30211	178	1550	43	2.8	0.42	329|330|445|1116|1906|2633|2634|2635|2852|3037|3576|3875|4217|4654|4790|4792|4824|6347|6348|6351|6352|6354|6355|6364|6772|7124|7133|7185|7412|8531|8718|8784|8995|9447|10673|27063|27242|55022|55504|60401|80149|81792|730249	BIRC2|BIRC3|ASS1|CHI3L1|EDN1|GBP1|GBP2|GBP3|GPER1|HAS2|CXCL8|KRT18|MAP3K5|MYOD1|NFKB1|NFKBIA|NKX3-1|CCL2|CCL3|CCL4|CCL5|CCL7|CCL8|CCL20|STAT1|TNF|TNFRSF1B|TRAF1|VCAM1|YBX3|TNFRSF25|TNFRSF18|TNFSF18|AIM2|TNFSF13B|ANKRD1|TNFRSF21|PID1|TNFRSF19|EDA2R|ZC3H12A|ADAMTS12|ACOD1	-15	MyList
GO Biological Processes	19	GO:0045071	negative regulation of viral genome replication	19_GO:0016032 viral process	-17	8.5	13	30211	57	1550	25	1.6	0.32	684|3428|3434|3669|4599|4938|4939|4940|5359|5610|6352|7124|8091|8638|9636|10318|24138|55337|57169|60489|64135|84875|91543|117854|200316	BST2|IFI16|IFIT1|ISG20|MX1|OAS1|OAS2|OAS3|PLSCR1|EIF2AK2|CCL5|TNF|HMGA2|OASL|ISG15|TNIP1|IFIT5|SHFL|ZNFX1|APOBEC3G|IFIH1|PARP10|RSAD2|TRIM6|APOBEC3F	-15	MyList
GO Biological Processes	19	GO:1902105	regulation of leukocyte differentiation	19_GO:0002376 immune system process	-17	3.8	11	30211	283	1550	55	3.5	0.47	25|634|639|652|861|972|1051|1435|2124|2624|2736|3106|3142|3204|3398|3574|3575|3594|3601|3623|3624|3659|3665|3718|3902|3965|3976|4067|4286|4323|5788|6348|6666|6935|7098|7124|7130|7292|7494|8111|8767|8876|9308|9580|9760|10385|27086|56833|64115|64332|80149|114548|146433|259307|282618	ABL1|CEACAM1|PRDM1|BMP4|RUNX1|CD74|CEBPB|CSF1|EVI2B|GATA2|GLI2|HLA-B|HLX|HOXA7|ID2|IL7|IL7R|IL12RB1|IL15RA|INHA|INHBA|IRF1|IRF7|JAK3|LAG3|LGALS9|LIF|LYN|MITF|MMP14|PTPRC|CCL3|SOX12|ZEB1|TLR3|TNF|TNFAIP6|TNFSF4|XBP1|GPR68|RIPK2|VNN1|CD83|SOX13|TOX|BTN2A2|FOXP1|SLAMF8|VSIR|NFKBIZ|ZC3H12A|NLRP3|IL34|IL4I1|IFNL1	-15	MyList
WikiPathways	27	WP5039	SARS-CoV-2 innate immunity evasion and cell-specific immune response		-17	7.7	13	30211	68	1550	27	1.7	0.33	1437|2919|2920|2921|3433|3455|3569|3576|3627|3665|3902|4599|4790|6347|6348|6351|6352|6372|6373|6374|6772|6773|7124|7706|23586|51284|79132	CSF2|CXCL1|CXCL2|CXCL3|IFIT2|IFNAR2|IL6|CXCL8|CXCL10|IRF7|LAG3|MX1|NFKB1|CCL2|CCL3|CCL4|CCL5|CXCL6|CXCL11|CXCL5|STAT1|STAT2|TNF|TRIM25|DDX58|TLR7|DHX58	-15	MyList
GO Biological Processes	19	GO:0001501	skeletal system development	19_GO:0032502 developmental process	-17	3	10	30211	495	1550	76	4.9	0.55	415|579|652|861|960|1028|1116|1300|1906|2114|2247|2697|2736|3037|3091|3198|3200|3201|3202|3203|3204|3205|3206|3215|3221|3223|3235|3623|3696|3714|3815|4211|4318|4323|4664|4982|5087|5156|5364|5734|5744|5745|5788|5916|6474|6591|6615|6662|6781|6935|7043|7092|7421|7474|7477|8091|8200|9249|9464|10019|23516|27086|51738|55553|56243|64651|80263|81792|85301|91461|116039|130497|144347|157506|285590|389125	ARSL|NKX3-2|BMP4|RUNX1|CD44|CDKN1C|CHI3L1|COL10A1|EDN1|ETS2|FGF2|GJA1|GLI2|HAS2|HIF1A|HOXA1|HOXA3|HOXA4|HOXA5|HOXA6|HOXA7|HOXA9|HOXA10|HOXB5|HOXC4|HOXC6|HOXD9|INHA|ITGB8|JAG2|KIT|MEIS1|MMP9|MMP14|NAB1|TNFRSF11B|PBX1|PDGFRA|PLXNB1|PTGER4|PTHLH|PTH1R|PTPRC|RARG|SHOX2|SNAI2|SNAI1|SOX9|STC1|ZEB1|TGFB3|TLL1|VDR|WNT5A|WNT7B|HMGA2|GDF5|DHRS3|HAND2|SH2B3|SLC39A14|FOXP1|GHRL|SOX6|KIAA1217|CSRNP1|TRIM45|AD…	-15	MyList
GO Biological Processes	19	GO:0043123	positive regulation of I-kappaB kinase/NF-kappaB signaling	19_GO:0023052 signaling	-17	4.6	11	30211	188	1550	44	2.8	0.42	25|329|330|684|834|843|972|2149|2697|3357|3552|3553|3965|4615|6398|6737|7098|7124|7706|8743|8767|8795|8837|9641|9830|10333|10346|10475|10616|10769|11040|24138|51523|51704|55504|57449|60401|80833|85363|92610|113277|114769|117854|257397	ABL1|BIRC2|BIRC3|BST2|CASP1|CASP10|CD74|F2R|GJA1|HTR2B|IL1A|IL1B|LGALS9|MYD88|SECTM1|TRIM21|TLR3|TNF|TRIM25|TNFSF10|RIPK2|TNFRSF10B|CFLAR|IKBKE|TRIM14|TLR6|TRIM22|TRIM38|RBCK1|PLK2|PIM2|IFIT5|CXXC5|GPRC5B|TNFRSF19|PLEKHG5|EDA2R|APOL3|TRIM5|TIFA|TMEM106A|CARD16|TRIM6|TAB3	-14	MyList
GO Biological Processes	19	GO:0045088	regulation of innate immune response	19_GO:0044419 biological process involved in interspecies interaction between organisms	-17	4.1	11	30211	231	1550	49	3.2	0.44	103|329|330|634|661|2069|3075|3106|3133|3134|3428|3430|3592|3659|3665|3902|3965|4067|4321|4938|4940|5359|5468|6318|6352|6737|6773|7128|7474|9111|9447|9636|9641|10906|11274|11277|25939|26191|51752|54625|56833|57169|79132|81030|83666|85363|115362|117854|730249	ADAR|BIRC2|BIRC3|CEACAM1|POLR3D|EREG|CFH|HLA-B|HLA-E|HLA-F|IFI16|IFI35|IL12A|IRF1|IRF7|LAG3|LGALS9|LYN|MMP12|OAS1|OAS3|PLSCR1|PPARG|SERPINB4|CCL5|TRIM21|STAT2|TNFAIP3|WNT5A|NMI|AIM2|ISG15|IKBKE|TRAFD1|USP18|TREX1|SAMHD1|PTPN22|ERAP1|PARP14|SLAMF8|ZNFX1|DHX58|ZBP1|PARP9|TRIM5|GBP5|TRIM6|ACOD1	-14	MyList
GO Biological Processes	19	GO:0051249	regulation of lymphocyte activation	19_GO:0002376 immune system process	-16	2.9	10	30211	532	1550	78	5	0.56	25|135|196|634|639|652|861|868|961|972|1051|1326|1803|1948|2736|3112|3133|3134|3142|3398|3481|3552|3553|3569|3574|3575|3592|3594|3601|3620|3623|3624|3659|3718|3902|3965|4067|4323|4615|5788|6347|6352|6666|6935|7128|7133|7292|7412|7494|7940|8767|8876|8995|9308|9473|9580|9760|10148|10385|10673|11151|11277|23149|23308|26191|27242|29126|56833|57829|64115|64332|80149|80380|114548|200558|259307|282618|2…	ABL1|ADORA2A|AHR|CEACAM1|PRDM1|BMP4|RUNX1|CBLB|CD47|CD74|CEBPB|MAP3K8|DPP4|EFNB2|GLI2|HLA-DOB|HLA-E|HLA-F|HLX|ID2|IGF2|IL1A|IL1B|IL6|IL7|IL7R|IL12A|IL12RB1|IL15RA|IDO1|INHA|INHBA|IRF1|JAK3|LAG3|LGALS9|LYN|MMP14|MYD88|PTPRC|CCL2|CCL5|SOX12|ZEB1|TNFAIP3|TNFRSF1B|TNFSF4|VCAM1|XBP1|LST1|RIPK2|VNN1|TNFSF18|CD83|THEMIS2|SOX13|TOX|EBI3|BTN2A2|TNFSF13B|CORO1A|TREX1|FCHO1|ICOSLG|PTPN22|TNFRSF21|CD274|SLAM…	-14	MyList
KEGG Pathway	24	hsa04064	NF-kappa B signaling pathway		-16	6	12	30211	104	1550	32	2.1	0.36	329|330|597|1540|1647|2919|2920|2921|3383|3553|3576|4050|4067|4615|4790|4791|4792|5328|5743|5971|6351|7124|7128|7185|7412|7706|8837|10673|23586|29775|60401|257397	BIRC2|BIRC3|BCL2A1|CYLD|GADD45A|CXCL1|CXCL2|CXCL3|ICAM1|IL1B|CXCL8|LTB|LYN|MYD88|NFKB1|NFKB2|NFKBIA|PLAU|PTGS2|RELB|CCL4|TNF|TNFAIP3|TRAF1|VCAM1|TRIM25|CFLAR|TNFSF13B|DDX58|CARD10|EDA2R|TAB3	-14	MyList
GO Biological Processes	19	GO:0050870	positive regulation of T cell activation	19_GO:0022610 biological adhesion	-16	4.1	11	30211	223	1550	47	3	0.44	861|961|972|1326|1803|1948|2736|3112|3133|3142|3481|3552|3553|3569|3574|3575|3592|3594|3718|3965|4067|5788|6347|6352|6666|7292|7412|7494|8767|8876|9308|9580|10148|10385|10673|11151|23149|23308|26191|29126|57829|64115|64332|80380|114548|259307|283234	RUNX1|CD47|CD74|MAP3K8|DPP4|EFNB2|GLI2|HLA-DOB|HLA-E|HLX|IGF2|IL1A|IL1B|IL6|IL7|IL7R|IL12A|IL12RB1|JAK3|LGALS9|LYN|PTPRC|CCL2|CCL5|SOX12|TNFSF4|VCAM1|XBP1|RIPK2|VNN1|CD83|SOX13|EBI3|BTN2A2|TNFSF13B|CORO1A|FCHO1|ICOSLG|PTPN22|CD274|ZP4|VSIR|NFKBIZ|PDCD1LG2|NLRP3|IL4I1|CCDC88B	-14	MyList
GO Biological Processes	19	GO:0050778	positive regulation of immune response	19_GO:0002376 immune system process	-16	2.8	9.9	30211	559	1550	80	5.2	0.56	25|629|661|715|716|717|718|719|784|868|972|2069|2207|2624|3075|3106|3133|3134|3142|3428|3430|3553|3569|3592|3594|3620|3665|3902|3965|4067|4321|5142|5293|5359|5788|6352|7124|7292|7462|7474|7494|7855|8013|8767|9111|9447|9473|9641|10384|10385|10603|10616|10673|11118|11119|11120|11277|23149|23180|23308|26191|27086|27242|28984|29126|54718|57169|57829|64332|80149|81030|83666|85363|91543|114548|115362|1…	ABL1|CFB|POLR3D|C1R|C1S|C2|C3|C3AR1|CACNB3|CBLB|CD74|EREG|FCER1G|GATA2|CFH|HLA-B|HLA-E|HLA-F|HLX|IFI16|IFI35|IL1B|IL6|IL12A|IL12RB1|IDO1|IRF7|LAG3|LGALS9|LYN|MMP12|PDE4B|PIK3CD|PLSCR1|PTPRC|CCL5|TNF|TNFSF4|LAT2|WNT5A|XBP1|FZD5|NR4A3|RIPK2|NMI|AIM2|THEMIS2|IKBKE|BTN3A3|BTN2A2|SH2B2|RBCK1|TNFSF13B|BTN3A2|BTN3A1|BTN2A1|TREX1|FCHO1|RFTN1|ICOSLG|PTPN22|FOXP1|TNFRSF21|RGCC|CD274|BTN2A3P|ZNFX1|ZP4|NFKBI…	-14	MyList
GO Biological Processes	19	GO:0050792	regulation of viral process	19_GO:0016032 viral process	-16	4.8	11	30211	159	1550	39	2.5	0.4	103|684|972|3428|3434|3576|3669|3965|4599|4938|4939|4940|5359|5610|5806|6352|6737|6772|7124|7706|8091|8638|9636|9830|10318|10346|10475|24138|27074|55337|57169|60489|64135|84875|85363|91543|117854|200316|222537	ADAR|BST2|CD74|IFI16|IFIT1|CXCL8|ISG20|LGALS9|MX1|OAS1|OAS2|OAS3|PLSCR1|EIF2AK2|PTX3|CCL5|TRIM21|STAT1|TNF|TRIM25|HMGA2|OASL|ISG15|TRIM14|TNIP1|TRIM22|TRIM38|IFIT5|LAMP3|SHFL|ZNFX1|APOBEC3G|IFIH1|PARP10|TRIM5|RSAD2|TRIM6|APOBEC3F|HS3ST5	-13	MyList
GO Biological Processes	19	GO:0045785	positive regulation of cell adhesion	19_GO:0022610 biological adhesion	-16	3	10	30211	446	1550	69	4.5	0.52	25|861|960|961|972|1326|1435|1803|1948|2113|2736|3037|3112|3133|3142|3481|3552|3553|3569|3574|3575|3592|3594|3718|3965|3976|4067|4651|4739|5329|5788|6288|6347|6352|6666|7124|7292|7412|7422|7474|7494|8013|8613|8767|8784|8876|8995|9223|9308|9435|9580|10148|10385|10673|11151|23149|23308|25890|26191|29126|55604|57829|64115|64332|79625|80380|114548|259307|283234	ABL1|RUNX1|CD44|CD47|CD74|MAP3K8|CSF1|DPP4|EFNB2|ETS1|GLI2|HAS2|HLA-DOB|HLA-E|HLX|IGF2|IL1A|IL1B|IL6|IL7|IL7R|IL12A|IL12RB1|JAK3|LGALS9|LIF|LYN|MYO10|NEDD9|PLAUR|PTPRC|SAA1|CCL2|CCL5|SOX12|TNF|TNFSF4|VCAM1|VEGFA|WNT5A|XBP1|NR4A3|PLPP3|RIPK2|TNFRSF18|VNN1|TNFSF18|MAGI1|CD83|CHST2|SOX13|EBI3|BTN2A2|TNFSF13B|CORO1A|FCHO1|ICOSLG|ABI3BP|PTPN22|CD274|CARMIL1|ZP4|VSIR|NFKBIZ|NDNF|PDCD1LG2|NLRP3|IL4I1|CC…	-13	MyList
WikiPathways	27	WP5094	Orexin receptor pathway		-15	4.8	11	30211	155	1550	38	2.5	0.39	861|1583|1628|1839|1846|2700|2920|3091|3309|3371|3383|3397|3399|3553|3569|3576|3663|3726|4023|4314|5069|5163|5337|5468|6506|6513|7124|7412|7422|7873|8013|8091|9314|9760|23764|50507|51523|148979	RUNX1|CYP11A1|DBP|HBEGF|DUSP4|GJA3|CXCL2|HIF1A|HSPA5|TNC|ICAM1|ID1|ID3|IL1B|IL6|CXCL8|IRF5|JUNB|LPL|MMP3|PAPPA|PDK1|PLD1|PPARG|SLC1A2|SLC2A1|TNF|VCAM1|VEGFA|MANF|NR4A3|HMGA2|KLF4|TOX|MAFF|NOX4|CXXC5|GLIS1	-13	MyList
GO Biological Processes	19	GO:0031349	positive regulation of defense response	19_GO:0048518 positive regulation of biological process	-15	3.6	10	30211	289	1550	53	3.4	0.46	661|718|834|961|1051|2069|2113|3133|3134|3428|3430|3553|3569|3592|3620|3665|3902|4023|4067|4321|4792|4814|4862|5054|5359|5734|5743|6348|6352|7098|7124|7292|7474|8767|9111|9180|9447|9641|10133|10318|51284|51704|57169|64332|81030|83666|84630|85363|90865|115362|117854|284467|338322	POLR3D|C3|CASP1|CD47|CEBPB|EREG|ETS1|HLA-E|HLA-F|IFI16|IFI35|IL1B|IL6|IL12A|IDO1|IRF7|LAG3|LPL|LYN|MMP12|NFKBIA|NINJ1|NPAS2|SERPINE1|PLSCR1|PTGER4|PTGS2|CCL3|CCL5|TLR3|TNF|TNFSF4|WNT5A|RIPK2|NMI|OSMR|AIM2|IKBKE|OPTN|TNIP1|TLR7|GPRC5B|ZNFX1|NFKBIZ|ZBP1|PARP9|TTBK1|TRIM5|IL33|GBP5|TRIM6|TAFA3|NLRP10	-13	MyList
GO Biological Processes	19	GO:0002685	regulation of leukocyte migration	19_GO:0040011 locomotion	-15	4	10	30211	218	1550	45	2.9	0.43	134|623|719|961|972|1435|1588|1803|1906|3204|3383|3552|3569|3576|3592|3627|3965|4067|4323|4615|5054|5641|5734|6347|6348|6351|6352|6354|6355|6364|7124|7130|7422|7424|7474|8784|8995|9435|23236|23604|56833|57509|84830|146433|148823	ADORA1|BDKRB1|C3AR1|CD47|CD74|CSF1|CYP19A1|DPP4|EDN1|HOXA7|ICAM1|IL1A|IL6|CXCL8|IL12A|CXCL10|LGALS9|LYN|MMP14|MYD88|SERPINE1|LGMN|PTGER4|CCL2|CCL3|CCL4|CCL5|CCL7|CCL8|CCL20|TNF|TNFAIP6|VEGFA|VEGFC|WNT5A|TNFRSF18|TNFSF18|CHST2|PLCB1|DAPK2|SLAMF8|MTUS1|ADTRP|IL34|GCSAML	-13	MyList
GO Biological Processes	19	GO:0052548	regulation of endopeptidase activity	19_GO:0008152 metabolic process	-15	3	9.8	30211	426	1550	66	4.3	0.51	135|329|330|637|668|684|718|834|843|960|1294|1410|1942|2149|2537|2852|3053|3428|3699|3965|4067|4155|4217|4318|4803|4824|5054|5055|5270|5271|5329|5371|5468|5641|5696|5698|5721|5743|5918|6091|6195|6318|7023|7124|7422|7980|8743|8767|8837|9314|9447|10017|25816|27074|27141|55075|64115|80758|83595|84630|89932|114548|114769|327657|653145|728113	ADORA2A|BIRC2|BIRC3|BID|FOXL2|BST2|C3|CASP1|CASP10|CD44|COL7A1|CRYAB|EFNA1|F2R|IFI6|GPER1|SERPIND1|IFI16|ITIH3|LGALS9|LYN|MBP|MAP3K5|MMP9|NGF|NKX3-1|SERPINE1|SERPINB2|SERPINE2|SERPINB8|PLAUR|PML|PPARG|LGMN|PSMB8|PSMB9|PSME2|PTGS2|RARRES1|ROBO1|RPS6KA1|SERPINB4|TFAP4|TNF|VEGFA|TFPI2|TNFSF10|RIPK2|CFLAR|KLF4|AIM2|BCL2L10|TNFAIP8|LAMP3|CIDEB|UACA|VSIR|PRR7|SOX7|TTBK1|PAPLN|NLRP3|CARD16|SERPINA9|ANXA…	-13	MyList
GO Biological Processes	19	GO:0045321	leukocyte activation	19_GO:0002376 immune system process	-15	2.8	9.6	30211	515	1550	74	4.8	0.54	25|684|868|960|972|1435|1437|1803|1906|2207|2697|3133|3383|3430|3460|3569|3574|3575|3576|3589|3659|3696|3714|3718|3815|3902|3936|4067|4189|4615|4683|5087|5293|5699|5734|5788|5971|6348|6352|6372|7098|7124|7292|7412|7462|7855|8013|8767|8995|9111|9580|9734|9760|10014|10148|10333|10397|10673|11119|11151|11277|23308|26191|27086|28514|54567|55509|56833|64218|80758|84941|91543|113277|116071	ABL1|BST2|CBLB|CD44|CD74|CSF1|CSF2|DPP4|EDN1|FCER1G|GJA1|HLA-E|ICAM1|IFI35|IFNGR2|IL6|IL7|IL7R|CXCL8|IL11|IRF1|ITGB8|JAG2|JAK3|KIT|LAG3|LCP1|LYN|DNAJB9|MYD88|NBN|PBX1|PIK3CD|PSMB10|PTGER4|PTPRC|RELB|CCL3|CCL5|CXCL6|TLR3|TNF|TNFSF4|VCAM1|LAT2|FZD5|NR4A3|RIPK2|TNFSF18|NMI|SOX13|HDAC9|TOX|HDAC5|EBI3|TLR6|NDRG1|TNFSF13B|BTN3A1|CORO1A|TREX1|ICOSLG|PTPN22|FOXP1|DLL1|DLL4|BATF3|SLAMF8|SEMA4A|PRR7|HSH2D|…	-13	MyList
GO Biological Processes	19	GO:0045069	regulation of viral genome replication	19_GO:0016032 viral process	-15	6.3	11	30211	87	1550	28	1.8	0.34	103|684|3428|3434|3576|3669|4599|4938|4939|4940|5359|5610|6352|7124|8091|8638|9636|10318|10475|24138|55337|57169|60489|64135|84875|91543|117854|200316	ADAR|BST2|IFI16|IFIT1|CXCL8|ISG20|MX1|OAS1|OAS2|OAS3|PLSCR1|EIF2AK2|CCL5|TNF|HMGA2|OASL|ISG15|TNIP1|TRIM38|IFIT5|SHFL|ZNFX1|APOBEC3G|IFIH1|PARP10|RSAD2|TRIM6|APOBEC3F	-12	MyList
GO Biological Processes	19	GO:0030162	regulation of proteolysis	19_GO:0008152 metabolic process	-15	2.4	9.2	30211	743	1550	93	6	0.6	135|329|330|637|668|684|718|825|834|843|859|861|960|1263|1294|1410|1942|2149|2161|2295|2537|2619|2852|3053|3428|3553|3699|3818|3965|4067|4130|4155|4217|4318|4323|4803|4824|5054|5055|5270|5271|5329|5371|5468|5641|5696|5698|5721|5743|5918|6091|6195|6318|6737|7023|7124|7133|7422|7980|8743|8767|8837|9314|9447|9709|10017|10318|25816|27074|27141|28951|51667|54103|54726|55075|55908|64115|80149|80758|835…	ADORA2A|BIRC2|BIRC3|BID|FOXL2|BST2|C3|CAPN3|CASP1|CASP10|CAV3|RUNX1|CD44|PLK3|COL7A1|CRYAB|EFNA1|F2R|F12|FOXF2|IFI6|GAS1|GPER1|SERPIND1|IFI16|IL1B|ITIH3|KLKB1|LGALS9|LYN|MAP1A|MBP|MAP3K5|MMP9|MMP14|NGF|NKX3-1|SERPINE1|SERPINB2|SERPINE2|SERPINB8|PLAUR|PML|PPARG|LGMN|PSMB8|PSMB9|PSME2|PTGS2|RARRES1|ROBO1|RPS6KA1|SERPINB4|TRIM21|TFAP4|TNF|TNFRSF1B|VEGFA|TFPI2|TNFSF10|RIPK2|CFLAR|KLF4|AIM2|HERPUD1|BC…	-12	MyList
GO Biological Processes	19	GO:0002520	immune system development	19_GO:0002376 immune system process	-15	2.5	9.3	30211	683	1550	88	5.7	0.59	25|103|579|652|861|947|972|1028|1052|1435|1437|1440|2009|2049|2120|2124|2207|2321|2323|2624|3091|3133|3200|3398|3428|3569|3574|3575|3589|3623|3624|3659|3696|3714|3718|3726|3815|3965|4050|4067|4189|4211|4222|4286|4318|4683|4791|4891|5087|5156|5238|5293|5371|5468|5734|5788|5971|6648|7124|7128|7412|7422|7474|7855|9314|9464|9580|9734|9760|10014|10019|10673|11277|23218|25939|26191|27086|28514|54567|55…	ABL1|ADAR|NKX3-2|BMP4|RUNX1|CD34|CD74|CDKN1C|CEBPD|CSF1|CSF2|CSF3|EML1|EPHB3|ETV6|EVI2B|FCER1G|FLT1|FLT3LG|GATA2|HIF1A|HLA-E|HOXA3|ID2|IFI16|IL6|IL7|IL7R|IL11|INHA|INHBA|IRF1|ITGB8|JAG2|JAK3|JUNB|KIT|LGALS9|LTB|LYN|DNAJB9|MEIS1|MEOX1|MITF|MMP9|NBN|NFKB2|SLC11A2|PBX1|PDGFRA|PGM3|PIK3CD|PML|PPARG|PTGER4|PTPRC|RELB|SOD2|TNF|TNFAIP3|VCAM1|VEGFA|WNT5A|FZD5|KLF4|HAND2|SOX13|HDAC9|TOX|HDAC5|SH2B3|TNFSF1…	-12	MyList
Reactome Gene Sets	6	R-HSA-6783783	Interleukin-10 signaling		-15	8.7	12	30211	47	1550	21	1.4	0.29	1435|1437|1440|2919|2920|3383|3552|3553|3569|3576|3592|3627|3976|5743|6347|6348|6351|6352|6364|7124|7133	CSF1|CSF2|CSF3|CXCL1|CXCL2|ICAM1|IL1A|IL1B|IL6|CXCL8|IL12A|CXCL10|LIF|PTGS2|CCL2|CCL3|CCL4|CCL5|CCL20|TNF|TNFRSF1B	-12	MyList
KEGG Pathway	24	hsa05417	Lipid and atherosclerosis		-15	4	10	30211	215	1550	44	2.8	0.42	19|637|834|840|2081|2919|2920|2921|3306|3309|3383|3553|3569|3576|3592|3665|4067|4217|4312|4314|4318|4615|4790|4792|4973|5293|5330|5452|5468|5533|5606|6347|6348|6352|6648|7124|7412|7494|8743|8795|9641|10333|23236|114548	ABCA1|BID|CASP1|CASP7|ERN1|CXCL1|CXCL2|CXCL3|HSPA2|HSPA5|ICAM1|IL1B|IL6|CXCL8|IL12A|IRF7|LYN|MAP3K5|MMP1|MMP3|MMP9|MYD88|NFKB1|NFKBIA|OLR1|PIK3CD|PLCB2|POU2F2|PPARG|PPP3CC|MAP2K3|CCL2|CCL3|CCL5|SOD2|TNF|VCAM1|XBP1|TNFSF10|TNFRSF10B|IKBKE|TLR6|PLCB1|NLRP3	-12	MyList
GO Biological Processes	19	GO:1901342	regulation of vasculature development	19_GO:0032502 developmental process	-15	3.2	9.7	30211	351	1550	58	3.7	0.48	25|133|634|718|719|861|947|1116|1634|1647|1942|2113|2247|2321|2624|3091|3099|3202|3397|3552|3553|3569|3576|3627|3696|4814|5054|5293|5371|5468|6019|6672|6772|7098|7124|7128|7422|7424|7453|7474|7494|8091|9314|10769|23129|23251|23670|28514|28984|51738|51752|54583|57381|64218|80149|154796|168667|407006	ABL1|ADM|CEACAM1|C3|C3AR1|RUNX1|CD34|CHI3L1|DCN|GADD45A|EFNA1|ETS1|FGF2|FLT1|GATA2|HIF1A|HK2|HOXA5|ID1|IL1A|IL1B|IL6|CXCL8|CXCL10|ITGB8|NINJ1|SERPINE1|PIK3CD|PML|PPARG|RLN2|SP100|STAT1|TLR3|TNF|TNFAIP3|VEGFA|VEGFC|WARS1|WNT5A|XBP1|HMGA2|KLF4|PLK2|PLXND1|MINAR1|CEMIP2|DLL1|RGCC|GHRL|ERAP1|EGLN1|RHOJ|SEMA4A|ZC3H12A|AMOT|BMPER|MIR221	-12	MyList
GO Biological Processes	19	GO:0045765	regulation of angiogenesis	19_GO:0032502 developmental process	-14	3.2	9.6	30211	345	1550	57	3.7	0.48	25|133|634|718|719|861|947|1116|1634|1647|1942|2113|2247|2321|2624|3091|3099|3202|3552|3553|3569|3576|3627|3696|4814|5054|5293|5371|5468|6019|6672|6772|7098|7124|7128|7422|7424|7453|7474|7494|8091|9314|10769|23129|23251|23670|28514|28984|51738|51752|54583|57381|64218|80149|154796|168667|407006	ABL1|ADM|CEACAM1|C3|C3AR1|RUNX1|CD34|CHI3L1|DCN|GADD45A|EFNA1|ETS1|FGF2|FLT1|GATA2|HIF1A|HK2|HOXA5|IL1A|IL1B|IL6|CXCL8|CXCL10|ITGB8|NINJ1|SERPINE1|PIK3CD|PML|PPARG|RLN2|SP100|STAT1|TLR3|TNF|TNFAIP3|VEGFA|VEGFC|WARS1|WNT5A|XBP1|HMGA2|KLF4|PLK2|PLXND1|MINAR1|CEMIP2|DLL1|RGCC|GHRL|ERAP1|EGLN1|RHOJ|SEMA4A|ZC3H12A|AMOT|BMPER|MIR221	-12	MyList
GO Biological Processes	19	GO:0060759	regulation of response to cytokine stimulus	19_GO:0050896 response to stimulus	-14	4.3	10	30211	178	1550	39	2.5	0.4	103|834|837|972|1435|1540|1906|3091|3569|3574|3656|3665|4321|4938|4940|5468|5788|6091|6352|6773|7128|7474|8767|9314|9636|9641|10019|11274|11277|23586|25939|54625|54726|64135|81030|83666|114769|117854|342979	ADAR|CASP1|CASP4|CD74|CSF1|CYLD|EDN1|HIF1A|IL6|IL7|IRAK2|IRF7|MMP12|OAS1|OAS3|PPARG|PTPRC|ROBO1|CCL5|STAT2|TNFAIP3|WNT5A|RIPK2|KLF4|ISG15|IKBKE|SH2B3|USP18|TREX1|DDX58|SAMHD1|PARP14|OTUD4|IFIH1|ZBP1|PARP9|CARD16|TRIM6|PALM3	-12	MyList
GO Biological Processes	19	GO:0045824	negative regulation of innate immune response	19_GO:0044419 biological process involved in interspecies interaction between organisms	-14	6.7	11	30211	73	1550	25	1.6	0.32	103|634|3106|3133|3134|3428|3965|4321|4938|4940|5468|6318|6737|6773|7128|9111|9636|10906|11274|11277|25939|54625|56833|79132|730249	ADAR|CEACAM1|HLA-B|HLA-E|HLA-F|IFI16|LGALS9|MMP12|OAS1|OAS3|PPARG|SERPINB4|TRIM21|STAT2|TNFAIP3|NMI|ISG15|TRAFD1|USP18|TREX1|SAMHD1|PARP14|SLAMF8|DHX58|ACOD1	-12	MyList
Reactome Gene Sets	6	R-HSA-372790	Signaling by GPCR		-14	2.4	9	30211	704	1550	88	5.7	0.59	133|134|135|146|623|624|718|719|885|1129|1607|1839|1901|1903|1906|2015|2149|2151|2535|2769|2852|2863|2869|2919|2920|2921|2925|3351|3357|3576|3627|3709|4160|4314|4987|5021|5136|5142|5330|5364|5533|5732|5734|5739|5744|5745|5997|5999|6019|6195|6288|6347|6348|6351|6352|6354|6364|6372|6373|6374|6608|6751|7225|7474|7477|7504|7855|8111|8601|8786|8862|9162|9283|9294|9890|10235|10636|11343|23236|26084|515…	ADM|ADORA1|ADORA2A|ADRA1D|BDKRB1|BDKRB2|C3|C3AR1|CCK|CHRM2|DGKB|HBEGF|S1PR1|S1PR3|EDN1|ADGRE1|F2R|F2RL2|FZD2|GNA15|GPER1|GPR39|GRK5|CXCL1|CXCL2|CXCL3|GRPR|HTR1B|HTR2B|CXCL8|CXCL10|ITPR2|MC4R|MMP3|OPRL1|OXTR|PDE1A|PDE4B|PLCB2|PLXNB1|PPP3CC|PTGER2|PTGER4|PTGIR|PTHLH|PTH1R|RGS2|RGS4|RLN2|RPS6KA1|SAA1|CCL2|CCL3|CCL4|CCL5|CCL7|CCL20|CXCL6|CXCL11|CXCL5|SMO|SSTR1|TRPC6|WNT5A|WNT7B|XK|FZD5|GPR68|RGS20|RG…	-12	MyList
GO Biological Processes	19	GO:0050777	negative regulation of immune response	19_GO:0002376 immune system process	-14	4.2	10	30211	179	1550	39	2.5	0.4	103|196|634|1379|3106|3133|3134|3142|3428|3575|3598|3718|3965|4067|4321|4938|4940|5468|5788|6318|6737|6773|7128|7292|9111|9636|10769|10906|11274|11277|25939|54625|56833|79132|79651|80149|259307|282618|730249	ADAR|AHR|CEACAM1|CR1L|HLA-B|HLA-E|HLA-F|HLX|IFI16|IL7R|IL13RA2|JAK3|LGALS9|LYN|MMP12|OAS1|OAS3|PPARG|PTPRC|SERPINB4|TRIM21|STAT2|TNFAIP3|TNFSF4|NMI|ISG15|PLK2|TRAFD1|USP18|TREX1|SAMHD1|PARP14|SLAMF8|DHX58|RHBDF2|ZC3H12A|IL4I1|IFNL1|ACOD1	-12	MyList
Reactome Gene Sets	6	R-HSA-6785807	Interleukin-4 and Interleukin-13 signaling		-14	5.4	11	30211	108	1550	30	1.9	0.35	1052|1901|2247|2308|3091|3383|3552|3553|3569|3576|3592|3598|3718|3726|3911|3976|4312|4314|4318|4582|5743|6288|6347|6772|6935|7124|7133|7412|7422|9021	CEBPD|S1PR1|FGF2|FOXO1|HIF1A|ICAM1|IL1A|IL1B|IL6|CXCL8|IL12A|IL13RA2|JAK3|JUNB|LAMA5|LIF|MMP1|MMP3|MMP9|MUC1|PTGS2|SAA1|CCL2|STAT1|ZEB1|TNF|TNFRSF1B|VCAM1|VEGFA|SOCS3	-12	MyList
GO Biological Processes	19	GO:0098586	cellular response to virus	19_GO:0044419 biological process involved in interspecies interaction between organisms	-14	7.2	11	30211	62	1550	23	1.5	0.31	103|2537|3091|3569|3592|3627|3665|3964|3965|4321|4790|4938|4940|5452|6352|7098|9641|23586|51284|64135|80149|114548|117854	ADAR|IFI6|HIF1A|IL6|IL12A|CXCL10|IRF7|LGALS8|LGALS9|MMP12|NFKB1|OAS1|OAS3|POU2F2|CCL5|TLR3|IKBKE|DDX58|TLR7|IFIH1|ZC3H12A|NLRP3|TRIM6	-11	MyList
GO Biological Processes	19	GO:0070663	regulation of leukocyte proliferation	19_GO:0050789 regulation of biological process	-14	3.6	9.7	30211	254	1550	47	3	0.44	196|652|684|868|972|1051|1435|1437|3133|3481|3552|3553|3569|3574|3592|3594|3620|3659|3718|3965|4067|4615|5788|6352|6355|7128|7133|7292|7412|7940|8767|8995|10148|10385|10673|11151|23308|26191|27242|29126|57829|64115|80380|90865|146433|259307|283234	AHR|BMP4|BST2|CBLB|CD74|CEBPB|CSF1|CSF2|HLA-E|IGF2|IL1A|IL1B|IL6|IL7|IL12A|IL12RB1|IDO1|IRF1|JAK3|LGALS9|LYN|MYD88|PTPRC|CCL5|CCL8|TNFAIP3|TNFRSF1B|TNFSF4|VCAM1|LST1|RIPK2|TNFSF18|EBI3|BTN2A2|TNFSF13B|CORO1A|ICOSLG|PTPN22|TNFRSF21|CD274|ZP4|VSIR|PDCD1LG2|IL33|IL34|IL4I1|CCDC88B	-11	MyList
GO Biological Processes	19	GO:0050731	positive regulation of peptidyl-tyrosine phosphorylation	19_GO:0048518 positive regulation of biological process	-14	4.1	10	30211	190	1550	40	2.6	0.4	25|134|374|685|960|972|1437|1440|1839|1942|2065|2069|2252|3084|3481|3569|3589|3592|3815|3976|4067|4739|5788|6352|7124|7422|8767|8784|8995|9244|10188|11009|50507|51704|51738|54625|83666|146433|282618|407006	ABL1|ADORA1|AREG|BTC|CD44|CD74|CSF2|CSF3|HBEGF|EFNA1|ERBB3|EREG|FGF7|NRG1|IGF2|IL6|IL11|IL12A|KIT|LIF|LYN|NEDD9|PTPRC|CCL5|TNF|VEGFA|RIPK2|TNFRSF18|TNFSF18|CRLF1|TNK2|IL24|NOX4|GPRC5B|GHRL|PARP14|PARP9|IL34|IFNL1|MIR221	-11	MyList
GO Biological Processes	19	GO:0001934	positive regulation of protein phosphorylation	19_GO:0048518 positive regulation of biological process	-14	2.4	8.9	30211	722	1550	89	5.7	0.59	25|134|374|627|652|685|718|960|972|1116|1435|1437|1440|1839|1906|1942|2065|2069|2081|2247|2252|2321|2852|3084|3306|3357|3481|3553|3569|3589|3592|3623|3624|3815|3976|4067|4217|4318|4515|4683|4739|4803|4824|5329|5468|5606|5743|5788|6091|6352|6662|7043|7098|7124|7422|7424|7474|7855|8091|8200|8767|8784|8795|8995|9052|9244|9294|10188|10333|11009|22943|27006|28984|29775|50507|51704|51738|54625|56892|83…	ABL1|ADORA1|AREG|BDNF|BMP4|BTC|C3|CD44|CD74|CHI3L1|CSF1|CSF2|CSF3|HBEGF|EDN1|EFNA1|ERBB3|EREG|ERN1|FGF2|FGF7|FLT1|GPER1|NRG1|HSPA2|HTR2B|IGF2|IL1B|IL6|IL11|IL12A|INHA|INHBA|KIT|LIF|LYN|MAP3K5|MMP9|MTCP1|NBN|NEDD9|NGF|NKX3-1|PLAUR|PPARG|MAP2K3|PTGS2|PTPRC|ROBO1|CCL5|SOX9|TGFB3|TLR3|TNF|VEGFA|VEGFC|WNT5A|FZD5|HMGA2|GDF5|RIPK2|TNFRSF18|TNFRSF10B|TNFSF18|GPRC5A|CRLF1|S1PR2|TNK2|TLR6|IL24|DKK1|FGF22|R…	-11	MyList
GO Biological Processes	19	GO:0048608	reproductive structure development	19_GO:0022414 reproductive process	-14	2.9	9.3	30211	419	1550	63	4.1	0.5	133|329|367|639|652|668|718|1028|1051|1437|1588|1594|2069|2295|2624|2697|2735|3091|3206|3309|3371|3481|3623|3624|3696|3726|3815|3880|3976|4323|4824|5156|5270|5468|5743|5806|5916|6615|6662|6665|6781|7026|7098|7130|7421|7422|7474|7477|7855|7942|8531|9021|10409|22836|23462|51738|56956|63951|84870|93649|113026|130497|157506	ADM|BIRC2|AR|PRDM1|BMP4|FOXL2|C3|CDKN1C|CEBPB|CSF2|CYP19A1|CYP27B1|EREG|FOXF2|GATA2|GJA1|GLI1|HIF1A|HOXA10|HSPA5|TNC|IGF2|INHA|INHBA|ITGB8|JUNB|KIT|KRT19|LIF|MMP14|NKX3-1|PDGFRA|SERPINE2|PPARG|PTGS2|PTX3|RARG|SNAI1|SOX9|SOX15|STC1|NR2F2|TLR3|TNFAIP6|VDR|VEGFA|WNT5A|WNT7B|FZD5|TFEB|YBX3|SOCS3|BASP1|RHOBTB3|HEY1|GHRL|LHX9|DMRTA1|RSPO3|MYOCD|PLCD3|OSR1|RDH10	-11	MyList
GO Biological Processes	19	GO:0061458	reproductive system development	19_GO:0032502 developmental process	-14	2.9	9.2	30211	422	1550	63	4.1	0.5	133|329|367|639|652|668|718|1028|1051|1437|1588|1594|2069|2295|2624|2697|2735|3091|3206|3309|3371|3481|3623|3624|3696|3726|3815|3880|3976|4323|4824|5156|5270|5468|5743|5806|5916|6615|6662|6665|6781|7026|7098|7130|7421|7422|7474|7477|7855|7942|8531|9021|10409|22836|23462|51738|56956|63951|84870|93649|113026|130497|157506	ADM|BIRC2|AR|PRDM1|BMP4|FOXL2|C3|CDKN1C|CEBPB|CSF2|CYP19A1|CYP27B1|EREG|FOXF2|GATA2|GJA1|GLI1|HIF1A|HOXA10|HSPA5|TNC|IGF2|INHA|INHBA|ITGB8|JUNB|KIT|KRT19|LIF|MMP14|NKX3-1|PDGFRA|SERPINE2|PPARG|PTGS2|PTX3|RARG|SNAI1|SOX9|SOX15|STC1|NR2F2|TLR3|TNFAIP6|VDR|VEGFA|WNT5A|WNT7B|FZD5|TFEB|YBX3|SOCS3|BASP1|RHOBTB3|HEY1|GHRL|LHX9|DMRTA1|RSPO3|MYOCD|PLCD3|OSR1|RDH10	-11	MyList
GO Biological Processes	19	GO:0052547	regulation of peptidase activity	19_GO:0008152 metabolic process	-14	2.8	9.1	30211	456	1550	66	4.3	0.51	135|329|330|637|668|684|718|834|843|960|1294|1410|1942|2149|2537|2852|3053|3428|3699|3965|4067|4155|4217|4318|4803|4824|5054|5055|5270|5271|5329|5371|5468|5641|5696|5698|5721|5743|5918|6091|6195|6318|7023|7124|7422|7980|8743|8767|8837|9314|9447|10017|25816|27074|27141|55075|64115|80758|83595|84630|89932|114548|114769|327657|653145|728113	ADORA2A|BIRC2|BIRC3|BID|FOXL2|BST2|C3|CASP1|CASP10|CD44|COL7A1|CRYAB|EFNA1|F2R|IFI6|GPER1|SERPIND1|IFI16|ITIH3|LGALS9|LYN|MBP|MAP3K5|MMP9|NGF|NKX3-1|SERPINE1|SERPINB2|SERPINE2|SERPINB8|PLAUR|PML|PPARG|LGMN|PSMB8|PSMB9|PSME2|PTGS2|RARRES1|ROBO1|RPS6KA1|SERPINB4|TFAP4|TNF|VEGFA|TFPI2|TNFSF10|RIPK2|CFLAR|KLF4|AIM2|BCL2L10|TNFAIP8|LAMP3|CIDEB|UACA|VSIR|PRR7|SOX7|TTBK1|PAPLN|NLRP3|CARD16|SERPINA9|ANXA…	-11	MyList
GO Biological Processes	19	GO:0048534	hematopoietic or lymphoid organ development	19_GO:0002376 immune system process	-14	2.5	8.9	30211	643	1550	82	5.3	0.57	25|103|579|652|861|947|972|1028|1052|1435|1437|1440|2009|2049|2120|2124|2207|2321|2323|2624|3091|3200|3398|3428|3569|3574|3575|3589|3623|3624|3659|3696|3714|3718|3726|3815|4050|4067|4189|4211|4222|4286|4318|4791|4891|5087|5156|5238|5293|5371|5468|5734|5788|5971|6648|7124|7412|7422|7474|7855|9314|9464|9580|9734|9760|10014|10019|10673|11277|23218|26191|27086|28514|54567|55008|55509|56833|64218|8075…	ABL1|ADAR|NKX3-2|BMP4|RUNX1|CD34|CD74|CDKN1C|CEBPD|CSF1|CSF2|CSF3|EML1|EPHB3|ETV6|EVI2B|FCER1G|FLT1|FLT3LG|GATA2|HIF1A|HOXA3|ID2|IFI16|IL6|IL7|IL7R|IL11|INHA|INHBA|IRF1|ITGB8|JAG2|JAK3|JUNB|KIT|LTB|LYN|DNAJB9|MEIS1|MEOX1|MITF|MMP9|NFKB2|SLC11A2|PBX1|PDGFRA|PGM3|PIK3CD|PML|PPARG|PTGER4|PTPRC|RELB|SOD2|TNF|VCAM1|VEGFA|WNT5A|FZD5|KLF4|HAND2|SOX13|HDAC9|TOX|HDAC5|SH2B3|TNFSF13B|TREX1|NBEAL2|PTPN22|FO…	-11	MyList
GO Biological Processes	19	GO:0061061	muscle structure development	19_GO:0032502 developmental process	-13	2.8	9	30211	480	1550	68	4.4	0.52	88|133|445|467|607|652|668|825|859|1000|1410|1827|1839|1901|2006|2115|2535|3084|3142|3235|3399|3481|3627|3679|3880|3911|3976|4015|4223|4654|4814|5156|5239|6474|6604|6608|6662|6665|7026|7422|7474|7494|7504|8572|8837|8912|9099|9242|10290|10324|10409|10472|23135|23462|23764|25802|27063|28514|29964|50507|54567|55553|55897|59269|80206|93649|284612|347273	ACTN2|ADM|ASS1|ATF3|BCL9|BMP4|FOXL2|CAPN3|CAV3|CDH2|CRYAB|RCAN1|HBEGF|S1PR1|ELN|ETV1|FZD2|NRG1|HLX|HOXD9|ID3|IGF2|CXCL10|ITGA7|KRT19|LAMA5|LIF|LOX|MEOX2|MYOD1|NINJ1|PDGFRA|PGM5|SHOX2|SMARCD3|SMO|SOX9|SOX15|NR2F2|VEGFA|WNT5A|XBP1|XK|PDLIM4|CFLAR|CACNA1H|USP2|MSC|SPEG|KLHL41|BASP1|ZBTB18|KDM6B|HEY1|MAFF|LMOD1|ANKRD1|DLL1|PRICKLE4|NOX4|DLL4|SOX6|MESP1|HIVEP3|FHOD3|MYOCD|SYPL2|CAVIN4	-11	MyList
GO Biological Processes	19	GO:0050867	positive regulation of cell activation	19_GO:0048518 positive regulation of biological process	-13	2.9	9.1	30211	436	1550	64	4.1	0.51	825|861|961|972|1326|1803|1948|2624|2736|3112|3133|3134|3142|3481|3552|3553|3569|3574|3575|3592|3594|3601|3718|3965|4067|4323|4615|5788|6195|6347|6348|6352|6665|6666|7124|7292|7412|7474|7494|8013|8767|8876|9308|9580|9760|10148|10333|10385|10673|11151|23149|23308|26191|29126|57829|64115|64332|80380|84630|90865|114548|259307|283234|284467	CAPN3|RUNX1|CD47|CD74|MAP3K8|DPP4|EFNB2|GATA2|GLI2|HLA-DOB|HLA-E|HLA-F|HLX|IGF2|IL1A|IL1B|IL6|IL7|IL7R|IL12A|IL12RB1|IL15RA|JAK3|LGALS9|LYN|MMP14|MYD88|PTPRC|RPS6KA1|CCL2|CCL3|CCL5|SOX15|SOX12|TNF|TNFSF4|VCAM1|WNT5A|XBP1|NR4A3|RIPK2|VNN1|CD83|SOX13|TOX|EBI3|TLR6|BTN2A2|TNFSF13B|CORO1A|FCHO1|ICOSLG|PTPN22|CD274|ZP4|VSIR|NFKBIZ|PDCD1LG2|TTBK1|IL33|NLRP3|IL4I1|CCDC88B|TAFA3	-11	MyList
WikiPathways	27	WP619	Type II interferon signaling (IFNG)		-13	9.5	12	30211	37	1550	18	1.2	0.27	2537|2633|3106|3383|3433|3460|3553|3627|3659|3660|4938|5610|5698|6772|6773|6890|9021|9636	IFI6|GBP1|HLA-B|ICAM1|IFIT2|IFNGR2|IL1B|CXCL10|IRF1|IRF2|OAS1|EIF2AK2|PSMB9|STAT1|STAT2|TAP1|SOCS3|ISG15	-11	MyList
GO Biological Processes	19	GO:2000116	regulation of cysteine-type endopeptidase activity	19_GO:0008152 metabolic process	-13	3.7	9.4	30211	229	1550	43	2.8	0.42	135|329|330|637|668|834|843|960|1410|2149|2537|2852|3428|3965|4217|4318|4824|5329|5371|5468|5641|5698|5743|6091|6195|7023|7124|7422|8743|8767|8837|9314|9447|10017|25816|27074|27141|55075|80758|83595|84630|114548|114769	ADORA2A|BIRC2|BIRC3|BID|FOXL2|CASP1|CASP10|CD44|CRYAB|F2R|IFI6|GPER1|IFI16|LGALS9|MAP3K5|MMP9|NKX3-1|PLAUR|PML|PPARG|LGMN|PSMB9|PTGS2|ROBO1|RPS6KA1|TFAP4|TNF|VEGFA|TNFSF10|RIPK2|CFLAR|KLF4|AIM2|BCL2L10|TNFAIP8|LAMP3|CIDEB|UACA|PRR7|SOX7|TTBK1|NLRP3|CARD16	-11	MyList
GO Biological Processes	19	GO:0001959	regulation of cytokine-mediated signaling pathway	19_GO:0023052 signaling	-13	4.2	9.7	30211	166	1550	36	2.3	0.38	103|834|837|972|1435|1540|1906|3091|3569|3574|3656|3665|4321|4938|4940|5468|5788|6091|6352|6773|7128|7474|8767|9636|9641|10019|11274|11277|25939|54625|54726|81030|83666|114769|117854|342979	ADAR|CASP1|CASP4|CD74|CSF1|CYLD|EDN1|HIF1A|IL6|IL7|IRAK2|IRF7|MMP12|OAS1|OAS3|PPARG|PTPRC|ROBO1|CCL5|STAT2|TNFAIP3|WNT5A|RIPK2|ISG15|IKBKE|SH2B3|USP18|TREX1|SAMHD1|PARP14|OTUD4|ZBP1|PARP9|CARD16|TRIM6|PALM3	-11	MyList
GO Biological Processes	19	GO:0043086	negative regulation of catalytic activity	19_GO:0065007 biological regulation	-13	2.3	8.5	30211	786	1550	92	5.9	0.6	25|32|103|135|329|330|341|634|652|684|718|859|868|960|1028|1294|1410|1594|1647|2537|2644|3053|3428|3434|3553|3574|3699|4067|4318|4790|4803|5054|5055|5270|5271|5329|5468|5743|5788|5794|5800|5806|5918|5997|6195|6318|6447|7023|7026|7124|7128|7422|7453|7980|9021|9052|9314|9734|10019|10188|10628|10636|11153|23516|25816|26191|27074|28951|54583|55924|79007|79661|83666|84101|84930|85450|89932|90007|93649…	ABL1|ACACB|ADAR|ADORA2A|BIRC2|BIRC3|APOC1|CEACAM1|BMP4|BST2|C3|CAV3|CBLB|CD44|CDKN1C|COL7A1|CRYAB|CYP27B1|GADD45A|IFI6|GCHFR|SERPIND1|IFI16|IFIT1|IL1B|IL7|ITIH3|LYN|MMP9|NFKB1|NGF|SERPINE1|SERPINB2|SERPINE2|SERPINB8|PLAUR|PPARG|PTGS2|PTPRC|PTPRH|PTPRO|PTX3|RARRES1|RGS2|RPS6KA1|SERPINB4|SCG5|TFAP4|NR2F2|TNF|TNFAIP3|VEGFA|WARS1|TFPI2|SOCS3|GPRC5A|KLF4|HDAC9|SH2B3|TNK2|TXNIP|RGS14|FICD|SLC39A14|TNFA…	-11	MyList
GO Biological Processes	19	GO:0071347	cellular response to interleukin-1	19_GO:0050896 response to stimulus	-13	5.4	10	30211	102	1550	28	1.8	0.34	961|1051|1906|2633|2634|2635|3037|3091|3553|3576|3656|4615|4790|4824|6347|6348|6351|6352|6354|6355|6364|6662|8564|23236|27063|80149|81792|730249	CD47|CEBPB|EDN1|GBP1|GBP2|GBP3|HAS2|HIF1A|IL1B|CXCL8|IRAK2|MYD88|NFKB1|NKX3-1|CCL2|CCL3|CCL4|CCL5|CCL7|CCL8|CCL20|SOX9|KMO|PLCB1|ANKRD1|ZC3H12A|ADAMTS12|ACOD1	-11	MyList
WikiPathways	27	WP4754	IL-18 signaling pathway		-13	3.4	9.2	30211	279	1550	48	3.1	0.44	32|330|467|637|1051|2920|2921|3383|3553|3569|3576|3659|3674|4050|4312|4314|4318|4323|4615|4790|4791|4792|4794|4982|5337|5743|5806|6347|6348|6351|6352|6364|7124|7127|7128|7185|7422|8837|8870|9021|9308|10194|27178|58191|64332|79931|80149|730249	ACACB|BIRC3|ATF3|BID|CEBPB|CXCL2|CXCL3|ICAM1|IL1B|IL6|CXCL8|IRF1|ITGA2B|LTB|MMP1|MMP3|MMP9|MMP14|MYD88|NFKB1|NFKB2|NFKBIA|NFKBIE|TNFRSF11B|PLD1|PTGS2|PTX3|CCL2|CCL3|CCL4|CCL5|CCL20|TNF|TNFAIP2|TNFAIP3|TRAF1|VEGFA|CFLAR|IER3|SOCS3|CD83|TSHZ1|IL37|CXCL16|NFKBIZ|TNIP3|ZC3H12A|ACOD1	-11	MyList
GO Biological Processes	19	GO:0048729	tissue morphogenesis	19_GO:0032502 developmental process	-13	2.6	8.7	30211	554	1550	73	4.7	0.54	25|133|220|367|374|634|652|960|1435|1839|1901|1906|1948|2247|2252|2295|2535|2637|2668|2697|2736|3084|3091|3202|3371|3624|3714|3909|3911|4321|4323|4824|5087|5371|5916|6091|6474|6591|6608|6615|6662|6781|6911|7421|7422|7424|7474|7477|7855|8091|8828|9021|9314|9464|10512|22943|23129|23135|23462|23671|26249|27063|28514|54567|55897|57619|65009|83478|84870|130497|144165|146206|157506	ABL1|ADM|ALDH1A3|AR|AREG|CEACAM1|BMP4|CD44|CSF1|HBEGF|S1PR1|EDN1|EFNB2|FGF2|FGF7|FOXF2|FZD2|GBX2|GDNF|GJA1|GLI2|NRG1|HIF1A|HOXA5|TNC|INHBA|JAG2|LAMA3|LAMA5|MMP12|MMP14|NKX3-1|PBX1|PML|RARG|ROBO1|SHOX2|SNAI2|SMO|SNAI1|SOX9|STC1|TBX6|VDR|VEGFA|VEGFC|WNT5A|WNT7B|FZD5|HMGA2|NRP2|SOCS3|KLF4|HAND2|SEMA3C|DKK1|PLXND1|KDM6B|HEY1|TMEFF2|KLHL3|ANKRD1|DLL1|DLL4|MESP1|SHROOM3|NDRG4|ARHGAP24|RSPO3|OSR1|PRICKL…	-11	MyList
GO Biological Processes	19	GO:0002697	regulation of immune effector process	19_GO:0002376 immune system process	-13	3	9	30211	353	1550	55	3.5	0.47	196|634|684|718|961|972|1379|2624|3075|3106|3133|3134|3142|3383|3553|3569|3575|3592|3594|3598|3718|3815|3902|3965|4067|4189|5788|6318|6372|7043|7098|7124|7133|7292|7474|7494|7855|8013|8767|11277|23586|26191|51704|55601|56833|64332|79132|80149|91543|114548|117854|144811|200558|259307|282618	AHR|CEACAM1|BST2|C3|CD47|CD74|CR1L|GATA2|CFH|HLA-B|HLA-E|HLA-F|HLX|ICAM1|IL1B|IL6|IL7R|IL12A|IL12RB1|IL13RA2|JAK3|KIT|LAG3|LGALS9|LYN|DNAJB9|PTPRC|SERPINB4|CXCL6|TGFB3|TLR3|TNF|TNFRSF1B|TNFSF4|WNT5A|XBP1|FZD5|NR4A3|RIPK2|TREX1|DDX58|PTPN22|GPRC5B|DDX60|SLAMF8|NFKBIZ|DHX58|ZC3H12A|RSAD2|NLRP3|TRIM6|LACC1|APLF|IL4I1|IFNL1	-10	MyList
GO Biological Processes	19	GO:0030097	hemopoiesis	19_GO:0002376 immune system process	-13	2.5	8.6	30211	594	1550	76	4.9	0.55	25|103|652|861|947|972|1028|1052|1435|1437|1440|2009|2120|2124|2207|2321|2323|2624|3091|3398|3428|3569|3574|3575|3589|3623|3624|3659|3696|3714|3718|3726|3815|4067|4189|4211|4222|4286|4318|4891|5087|5156|5238|5293|5371|5468|5734|5788|5971|6648|7124|7412|7422|7474|7855|9314|9580|9734|9760|10014|10019|10673|11277|23218|26191|27086|28514|54567|55008|55509|56833|64218|80758|91543|116071|219790	ABL1|ADAR|BMP4|RUNX1|CD34|CD74|CDKN1C|CEBPD|CSF1|CSF2|CSF3|EML1|ETV6|EVI2B|FCER1G|FLT1|FLT3LG|GATA2|HIF1A|ID2|IFI16|IL6|IL7|IL7R|IL11|INHA|INHBA|IRF1|ITGB8|JAG2|JAK3|JUNB|KIT|LYN|DNAJB9|MEIS1|MEOX1|MITF|MMP9|SLC11A2|PBX1|PDGFRA|PGM3|PIK3CD|PML|PPARG|PTGER4|PTPRC|RELB|SOD2|TNF|VCAM1|VEGFA|WNT5A|FZD5|KLF4|SOX13|HDAC9|TOX|HDAC5|SH2B3|TNFSF13B|TREX1|NBEAL2|PTPN22|FOXP1|DLL1|DLL4|HERC6|BATF3|SLAMF8|SE…	-10	MyList
GO Biological Processes	19	GO:0009725	response to hormone	19_GO:0050896 response to stimulus	-13	2.3	8.4	30211	742	1550	88	5.7	0.59	15|21|88|133|367|374|445|490|634|652|717|1520|1583|1594|1906|2069|2308|2852|3177|3206|3351|3481|3569|3624|3718|3795|3815|3880|4005|4015|4067|4155|4160|4323|4654|4790|4824|4982|5021|5069|5468|5563|5732|5734|5743|5916|6513|6751|6772|6773|6775|6776|6781|7023|7043|7124|7292|7352|7357|7477|7494|7706|8013|8835|8837|8912|9734|9882|10014|10148|10458|10603|10628|23236|23516|28999|51738|54541|55022|55809|8…	AANAT|ABCA3|ACTN2|ADM|AR|AREG|ASS1|ATP2B1|CEACAM1|BMP4|C2|CTSS|CYP11A1|CYP27B1|EDN1|EREG|FOXO1|GPER1|SLC29A2|HOXA10|HTR1B|IGF2|IL6|INHBA|JAK3|KHK|KIT|KRT19|LMO2|LOX|LYN|MBP|MC4R|MMP14|MYOD1|NFKB1|NKX3-1|TNFRSF11B|OXTR|PAPPA|PPARG|PRKAA2|PTGER2|PTGER4|PTGS2|RARG|SLC2A1|SSTR1|STAT1|STAT2|STAT4|STAT5A|STC1|TFAP4|TGFB3|TNF|TNFSF4|UCP3|UGCG|WNT7B|XBP1|TRIM25|NR4A3|SOCS2|CFLAR|CACNA1H|HDAC9|TBC1D4|HDAC…	-10	MyList
GO Biological Processes	19	GO:0002696	positive regulation of leukocyte activation	19_GO:0002376 immune system process	-13	2.8	8.8	30211	421	1550	61	3.9	0.49	861|961|972|1326|1803|1948|2624|2736|3112|3133|3134|3142|3481|3552|3553|3569|3574|3575|3592|3594|3601|3718|3965|4067|4323|4615|5788|6347|6348|6352|6666|7124|7292|7412|7474|7494|8013|8767|8876|9308|9580|9760|10148|10333|10385|10673|11151|23149|23308|26191|29126|57829|64115|64332|80380|84630|90865|114548|259307|283234|284467	RUNX1|CD47|CD74|MAP3K8|DPP4|EFNB2|GATA2|GLI2|HLA-DOB|HLA-E|HLA-F|HLX|IGF2|IL1A|IL1B|IL6|IL7|IL7R|IL12A|IL12RB1|IL15RA|JAK3|LGALS9|LYN|MMP14|MYD88|PTPRC|CCL2|CCL3|CCL5|SOX12|TNF|TNFSF4|VCAM1|WNT5A|XBP1|NR4A3|RIPK2|VNN1|CD83|SOX13|TOX|EBI3|TLR6|BTN2A2|TNFSF13B|CORO1A|FCHO1|ICOSLG|PTPN22|CD274|ZP4|VSIR|NFKBIZ|PDCD1LG2|TTBK1|IL33|NLRP3|IL4I1|CCDC88B|TAFA3	-10	MyList
GO Biological Processes	19	GO:0048732	gland development	19_GO:0032502 developmental process	-12	2.9	8.8	30211	401	1550	59	3.8	0.49	25|220|367|374|445|652|999|1028|1051|1435|1588|1906|1999|2049|2247|2252|2624|2697|2735|2736|3084|3091|3099|3142|3177|3200|3202|3206|3235|3371|3398|3481|3569|3911|4824|5021|5087|5156|5270|5371|5916|6195|6608|6648|6662|6776|7043|7124|7421|7422|7474|7477|7494|8835|8862|9464|10512|23129|87178	ABL1|ALDH1A3|AR|AREG|ASS1|BMP4|CDH1|CDKN1C|CEBPB|CSF1|CYP19A1|EDN1|ELF3|EPHB3|FGF2|FGF7|GATA2|GJA1|GLI1|GLI2|NRG1|HIF1A|HK2|HLX|SLC29A2|HOXA3|HOXA5|HOXA10|HOXD9|TNC|ID2|IGF2|IL6|LAMA5|NKX3-1|OXTR|PBX1|PDGFRA|SERPINE2|PML|RARG|RPS6KA1|SMO|SOD2|SOX9|STAT5A|TGFB3|TNF|VDR|VEGFA|WNT5A|WNT7B|XBP1|SOCS2|APLN|HAND2|SEMA3C|PLXND1|PNPT1	-10	MyList
GO Biological Processes	19	GO:0050866	negative regulation of cell activation	19_GO:0048519 negative regulation of biological process	-12	3.7	9.3	30211	216	1550	41	2.6	0.41	18|135|634|652|861|868|972|1051|2852|3134|3142|3398|3598|3620|3623|3624|3659|3718|3902|3965|4067|5156|5270|5788|7128|7292|7940|10019|10385|26191|27242|29126|64115|80149|80380|114757|114897|145581|259307|282618|284467	ABAT|ADORA2A|CEACAM1|BMP4|RUNX1|CBLB|CD74|CEBPB|GPER1|HLA-F|HLX|ID2|IL13RA2|IDO1|INHA|INHBA|IRF1|JAK3|LAG3|LGALS9|LYN|PDGFRA|SERPINE2|PTPRC|TNFAIP3|TNFSF4|LST1|SH2B3|BTN2A2|PTPN22|TNFRSF21|CD274|VSIR|ZC3H12A|PDCD1LG2|CYGB|C1QTNF1|LRFN5|IL4I1|IFNL1|TAFA3	-10	MyList
GO Biological Processes	19	GO:0002832	negative regulation of response to biotic stimulus	19_GO:0048519 negative regulation of biological process	-12	5	9.9	30211	113	1550	29	1.9	0.34	103|196|634|3106|3133|3134|3428|3965|4321|4938|4940|5468|6318|6737|6773|7128|9111|9636|10475|10906|11274|11277|25939|54625|56833|79132|114769|259307|730249	ADAR|AHR|CEACAM1|HLA-B|HLA-E|HLA-F|IFI16|LGALS9|MMP12|OAS1|OAS3|PPARG|SERPINB4|TRIM21|STAT2|TNFAIP3|NMI|ISG15|TRIM38|TRAFD1|USP18|TREX1|SAMHD1|PARP14|SLAMF8|DHX58|CARD16|IL4I1|ACOD1	-10	MyList
GO Biological Processes	19	GO:0045619	regulation of lymphocyte differentiation	19_GO:0002376 immune system process	-12	4	9.4	30211	181	1550	37	2.4	0.39	25|639|652|861|972|2736|3142|3398|3574|3575|3594|3601|3623|3624|3659|3718|3902|3965|4323|5788|6666|6935|7292|7494|8767|8876|9308|9580|9760|10385|56833|64115|64332|80149|114548|259307|282618	ABL1|PRDM1|BMP4|RUNX1|CD74|GLI2|HLX|ID2|IL7|IL7R|IL12RB1|IL15RA|INHA|INHBA|IRF1|JAK3|LAG3|LGALS9|MMP14|PTPRC|SOX12|ZEB1|TNFSF4|XBP1|RIPK2|VNN1|CD83|SOX13|TOX|BTN2A2|SLAMF8|VSIR|NFKBIZ|ZC3H12A|NLRP3|IL4I1|IFNL1	-10	MyList
GO Biological Processes	19	GO:0031348	negative regulation of defense response	19_GO:0048519 negative regulation of biological process	-12	3.3	9	30211	268	1550	46	3	0.43	103|134|135|634|1588|2852|3106|3133|3134|3428|3965|4067|4321|4790|4938|4940|5468|5734|5788|6288|6318|6737|6773|7128|7130|7133|9021|9111|9314|9636|10475|10769|10906|11274|11277|25939|51738|54625|56833|79132|79651|114548|145581|284467|407006|730249	ADAR|ADORA1|ADORA2A|CEACAM1|CYP19A1|GPER1|HLA-B|HLA-E|HLA-F|IFI16|LGALS9|LYN|MMP12|NFKB1|OAS1|OAS3|PPARG|PTGER4|PTPRC|SAA1|SERPINB4|TRIM21|STAT2|TNFAIP3|TNFAIP6|TNFRSF1B|SOCS3|NMI|KLF4|ISG15|TRIM38|PLK2|TRAFD1|USP18|TREX1|SAMHD1|GHRL|PARP14|SLAMF8|DHX58|RHBDF2|NLRP3|LRFN5|TAFA3|MIR221|ACOD1	-10	MyList
GO Biological Processes	19	GO:0051090	regulation of DNA-binding transcription factor activity	19_GO:0008152 metabolic process	-12	2.7	8.6	30211	451	1550	63	4.1	0.5	367|825|1440|1540|1906|2044|2535|2735|3397|3398|3399|3553|3569|3656|3815|3965|4615|4792|4793|4794|4824|5468|5610|6608|6672|6737|6911|7098|7124|7128|7185|7292|7422|7474|7706|8613|8767|8837|8995|9314|9447|9464|9641|9830|10014|10333|10346|10475|10616|23586|28984|54583|60401|80149|84875|85363|93649|114548|114769|117854|219790|338382|730249	AR|CAPN3|CSF3|CYLD|EDN1|EPHA5|FZD2|GLI1|ID1|ID2|ID3|IL1B|IL6|IRAK2|KIT|LGALS9|MYD88|NFKBIA|NFKBIB|NFKBIE|NKX3-1|PPARG|EIF2AK2|SMO|SP100|TRIM21|TBX6|TLR3|TNF|TNFAIP3|TRAF1|TNFSF4|VEGFA|WNT5A|TRIM25|PLPP3|RIPK2|CFLAR|TNFSF18|KLF4|AIM2|HAND2|IKBKE|TRIM14|HDAC5|TLR6|TRIM22|TRIM38|RBCK1|DDX58|RGCC|EGLN1|EDA2R|ZC3H12A|PARP10|TRIM5|MYOCD|NLRP3|CARD16|TRIM6|RTKN2|RAB7B|ACOD1	-10	MyList
GO Biological Processes	19	GO:0035456	response to interferon-beta	19_GO:0050896 response to stimulus	-12	9.7	12	30211	32	1550	16	1	0.26	684|3428|3455|3659|4938|5359|6772|7098|9447|9641|11277|54739|55337|87178|117854|730249	BST2|IFI16|IFNAR2|IRF1|OAS1|PLSCR1|STAT1|TLR3|AIM2|IKBKE|TREX1|XAF1|SHFL|PNPT1|TRIM6|ACOD1	-10	MyList
KEGG Pathway	24	hsa05323	Rheumatoid arthritis		-12	5.4	10	30211	93	1550	26	1.7	0.33	1435|1437|2321|2919|2920|2921|3112|3383|3552|3553|3569|3576|3589|4050|4312|4314|6347|6348|6352|6364|6372|6374|7043|7124|7422|10673	CSF1|CSF2|FLT1|CXCL1|CXCL2|CXCL3|HLA-DOB|ICAM1|IL1A|IL1B|IL6|CXCL8|IL11|LTB|MMP1|MMP3|CCL2|CCL3|CCL5|CCL20|CXCL6|CXCL5|TGFB3|TNF|VEGFA|TNFSF13B	-9.9	MyList
WikiPathways	27	WP254	Apoptosis		-12	5.7	10	30211	86	1550	25	1.6	0.32	329|330|637|834|837|840|843|3481|3659|3660|3663|3665|4790|4792|4793|4794|7124|7133|7185|8718|8739|8743|8795|8837|27242	BIRC2|BIRC3|BID|CASP1|CASP4|CASP7|CASP10|IGF2|IRF1|IRF2|IRF5|IRF7|NFKB1|NFKBIA|NFKBIB|NFKBIE|TNF|TNFRSF1B|TRAF1|TNFRSF25|HRK|TNFSF10|TNFRSF10B|CFLAR|TNFRSF21	-9.9	MyList
GO Biological Processes	19	GO:0070555	response to interleukin-1	19_GO:0050896 response to stimulus	-12	4.6	9.6	30211	132	1550	31	2	0.36	961|1051|1116|1906|2633|2634|2635|3037|3091|3553|3576|3656|3965|4615|4790|4824|6347|6348|6351|6352|6354|6355|6364|6662|8564|8767|23236|27063|80149|81792|730249	CD47|CEBPB|CHI3L1|EDN1|GBP1|GBP2|GBP3|HAS2|HIF1A|IL1B|CXCL8|IRAK2|LGALS9|MYD88|NFKB1|NKX3-1|CCL2|CCL3|CCL4|CCL5|CCL7|CCL8|CCL20|SOX9|KMO|RIPK2|PLCB1|ANKRD1|ZC3H12A|ADAMTS12|ACOD1	-9.9	MyList
GO Biological Processes	19	GO:0050730	regulation of peptidyl-tyrosine phosphorylation	19_GO:0008152 metabolic process	-12	3.4	8.9	30211	261	1550	45	2.9	0.43	25|134|374|685|868|960|972|1437|1440|1839|1942|2065|2069|2252|3084|3481|3569|3574|3589|3592|3815|3976|4067|4739|5788|6352|7124|7422|8767|8784|8995|9021|9052|9244|10019|10188|11009|50507|51704|51738|54625|83666|146433|282618|407006	ABL1|ADORA1|AREG|BTC|CBLB|CD44|CD74|CSF2|CSF3|HBEGF|EFNA1|ERBB3|EREG|FGF7|NRG1|IGF2|IL6|IL7|IL11|IL12A|KIT|LIF|LYN|NEDD9|PTPRC|CCL5|TNF|VEGFA|RIPK2|TNFRSF18|TNFSF18|SOCS3|GPRC5A|CRLF1|SH2B3|TNK2|IL24|NOX4|GPRC5B|GHRL|PARP14|PARP9|IL34|IFNL1|MIR221	-9.9	MyList
GO Biological Processes	19	GO:0048562	embryonic organ morphogenesis	19_GO:0032502 developmental process	-12	3.2	8.8	30211	292	1550	48	3.1	0.44	220|579|652|668|1906|1942|2295|2535|2624|2637|2697|2735|3091|3142|3198|3200|3201|3202|3203|3204|3205|3215|3221|3235|3398|4237|4323|5013|5156|5357|5916|6474|6608|6662|6911|6935|7043|7474|7855|9464|10194|26018|28514|55897|65009|116039|130497|157506	ALDH1A3|NKX3-2|BMP4|FOXL2|EDN1|EFNA1|FOXF2|FZD2|GATA2|GBX2|GJA1|GLI1|HIF1A|HLX|HOXA1|HOXA3|HOXA4|HOXA5|HOXA6|HOXA7|HOXA9|HOXB5|HOXC4|HOXD9|ID2|MFAP2|MMP14|OTX1|PDGFRA|PLS1|RARG|SHOX2|SMO|SOX9|TBX6|ZEB1|TGFB3|WNT5A|FZD5|HAND2|TSHZ1|LRIG1|DLL1|MESP1|NDRG4|OSR2|OSR1|RDH10	-9.8	MyList
GO Biological Processes	19	GO:0071346	cellular response to interferon-gamma	19_GO:0044419 biological process involved in interspecies interaction between organisms	-12	5.2	9.8	30211	102	1550	27	1.7	0.33	445|834|961|1906|2633|2634|2635|3594|3659|3965|6347|6348|6351|6352|6354|6355|6364|6672|6772|7098|7124|7474|9111|115361|115362|338382|730249	ASS1|CASP1|CD47|EDN1|GBP1|GBP2|GBP3|IL12RB1|IRF1|LGALS9|CCL2|CCL3|CCL4|CCL5|CCL7|CCL8|CCL20|SP100|STAT1|TLR3|TNF|WNT5A|NMI|GBP4|GBP5|RAB7B|ACOD1	-9.8	MyList
WikiPathways	27	WP5055	Burn wound healing		-12	5	9.7	30211	110	1550	28	1.8	0.34	1634|2006|2919|3371|3383|3552|3553|3569|3576|3624|4312|4314|4318|4615|4790|4792|6347|6591|7043|7098|7124|7128|7422|9314|10333|50507|51284|64332	DCN|ELN|CXCL1|TNC|ICAM1|IL1A|IL1B|IL6|CXCL8|INHBA|MMP1|MMP3|MMP9|MYD88|NFKB1|NFKBIA|CCL2|SNAI2|TGFB3|TLR3|TNF|TNFAIP3|VEGFA|KLF4|TLR6|NOX4|TLR7|NFKBIZ	-9.7	MyList
GO Biological Processes	19	GO:0007162	negative regulation of cell adhesion	19_GO:0022610 biological adhesion	-12	3.1	8.7	30211	305	1550	49	3.2	0.44	18|25|135|445|634|652|861|868|972|999|1051|2065|2633|3142|3204|3620|3659|3718|3902|3965|4155|4321|4323|4582|5054|5270|5364|5788|5800|6591|7292|7422|9314|9404|10019|10385|23129|26191|27242|28984|29126|64115|80149|80380|84830|114897|259307|282618|407006	ABAT|ABL1|ADORA2A|ASS1|CEACAM1|BMP4|RUNX1|CBLB|CD74|CDH1|CEBPB|ERBB3|GBP1|HLX|HOXA7|IDO1|IRF1|JAK3|LAG3|LGALS9|MBP|MMP12|MMP14|MUC1|SERPINE1|SERPINE2|PLXNB1|PTPRC|PTPRO|SNAI2|TNFSF4|VEGFA|KLF4|LPXN|SH2B3|BTN2A2|PLXND1|PTPN22|TNFRSF21|RGCC|CD274|VSIR|ZC3H12A|PDCD1LG2|ADTRP|C1QTNF1|IL4I1|IFNL1|MIR221	-9.7	MyList
GO Biological Processes	19	GO:0051091	positive regulation of DNA-binding transcription factor activity	19_GO:0008152 metabolic process	-12	3.3	8.8	30211	264	1550	45	2.9	0.43	367|825|1440|1906|2044|2535|3553|3569|3656|3815|3965|4615|4824|5468|5610|6608|6737|7098|7124|7185|7422|7474|7706|8613|8767|8837|8995|9447|9641|9830|10014|10333|10346|10475|10616|23586|28984|60401|85363|93649|114548|114769|117854|219790|338382	AR|CAPN3|CSF3|EDN1|EPHA5|FZD2|IL1B|IL6|IRAK2|KIT|LGALS9|MYD88|NKX3-1|PPARG|EIF2AK2|SMO|TRIM21|TLR3|TNF|TRAF1|VEGFA|WNT5A|TRIM25|PLPP3|RIPK2|CFLAR|TNFSF18|AIM2|IKBKE|TRIM14|HDAC5|TLR6|TRIM22|TRIM38|RBCK1|DDX58|RGCC|EDA2R|TRIM5|MYOCD|NLRP3|CARD16|TRIM6|RTKN2|RAB7B	-9.7	MyList
GO Biological Processes	19	GO:0007507	heart development	19_GO:0032502 developmental process	-12	2.5	8.3	30211	542	1550	70	4.5	0.53	88|133|639|652|840|859|1901|1906|1942|2006|2050|2065|2247|2535|2697|2736|3037|3084|3091|3357|3398|3399|3552|3764|4015|4824|5021|5156|5606|6091|6474|6591|6604|6608|6615|6648|6662|6911|7133|7412|7422|7474|8572|8828|8862|9242|9249|9464|9734|10512|11277|23129|23135|23462|27063|28514|29964|50507|54567|55130|55803|55897|65009|80206|93649|130497|144165|199699|284612|285590	ACTN2|ADM|PRDM1|BMP4|CASP7|CAV3|S1PR1|EDN1|EFNA1|ELN|EPHB4|ERBB3|FGF2|FZD2|GJA1|GLI2|HAS2|NRG1|HIF1A|HTR2B|ID2|ID3|IL1A|KCNJ8|LOX|NKX3-1|OXTR|PDGFRA|MAP2K3|ROBO1|SHOX2|SNAI2|SMARCD3|SMO|SNAI1|SOD2|SOX9|TBX6|TNFRSF1B|VCAM1|VEGFA|WNT5A|PDLIM4|NRP2|APLN|MSC|DHRS3|HAND2|HDAC9|SEMA3C|TREX1|PLXND1|KDM6B|HEY1|ANKRD1|DLL1|PRICKLE4|NOX4|DLL4|ODAD2|ADAP2|MESP1|NDRG4|FHOD3|MYOCD|OSR1|PRICKLE1|DAND5|SYPL2|SH…	-9.7	MyList
GO Biological Processes	19	GO:0043009	chordate embryonic development	19_GO:0032502 developmental process	-12	2.4	8.2	30211	629	1550	77	5	0.55	25|133|367|579|639|652|1028|1051|1437|1906|1999|2535|2624|2637|2697|2736|3091|3198|3200|3201|3202|3203|3204|3205|3215|3221|3223|3235|3481|3714|3726|3880|3976|4222|4223|4323|4683|4824|5087|5156|5745|5916|6474|6608|6615|6662|6665|6911|6935|7026|7043|7422|7474|7477|7779|7855|7942|8531|9021|9464|10361|10512|22943|23462|23764|28514|55897|56243|57619|80312|84870|113026|116039|130497|144165|154796|157506	ABL1|ADM|AR|NKX3-2|PRDM1|BMP4|CDKN1C|CEBPB|CSF2|EDN1|ELF3|FZD2|GATA2|GBX2|GJA1|GLI2|HIF1A|HOXA1|HOXA3|HOXA4|HOXA5|HOXA6|HOXA7|HOXA9|HOXB5|HOXC4|HOXC6|HOXD9|IGF2|JAG2|JUNB|KRT19|LIF|MEOX1|MEOX2|MMP14|NBN|NKX3-1|PBX1|PDGFRA|PTH1R|RARG|SHOX2|SMO|SNAI1|SOX9|SOX15|TBX6|ZEB1|NR2F2|TGFB3|VEGFA|WNT5A|WNT7B|SLC30A1|FZD5|TFEB|YBX3|SOCS3|HAND2|NPM2|SEMA3C|DKK1|HEY1|MAFF|DLL1|MESP1|KIAA1217|SHROOM3|TET1|RSPO…	-9.6	MyList
WikiPathways	27	WP1449	Regulation of toll-like receptor signaling pathway		-12	4.3	9.3	30211	145	1550	32	2.1	0.36	1326|1540|3455|3553|3569|3576|3592|3627|3656|3663|3665|4615|4790|4791|4792|5293|5606|6348|6351|6352|6373|6772|7098|7124|7128|9641|10333|10616|10906|51284|92610|257397	MAP3K8|CYLD|IFNAR2|IL1B|IL6|CXCL8|IL12A|CXCL10|IRAK2|IRF5|IRF7|MYD88|NFKB1|NFKB2|NFKBIA|PIK3CD|MAP2K3|CCL3|CCL4|CCL5|CXCL11|STAT1|TLR3|TNF|TNFAIP3|IKBKE|TLR6|RBCK1|TRAFD1|TLR7|TIFA|TAB3	-9.5	MyList
GO Biological Processes	19	GO:0050729	positive regulation of inflammatory response	19_GO:0048518 positive regulation of biological process	-12	4.3	9.3	30211	145	1550	32	2.1	0.36	718|834|961|1051|2113|3133|3430|3553|3569|3620|4023|4792|4814|5054|5734|5743|6348|7098|7124|7292|7474|9111|9180|10318|51284|51704|64332|81030|84630|90865|284467|338322	C3|CASP1|CD47|CEBPB|ETS1|HLA-E|IFI35|IL1B|IL6|IDO1|LPL|NFKBIA|NINJ1|SERPINE1|PTGER4|PTGS2|CCL3|TLR3|TNF|TNFSF4|WNT5A|NMI|OSMR|TNIP1|TLR7|GPRC5B|NFKBIZ|ZBP1|TTBK1|IL33|TAFA3|NLRP10	-9.5	MyList
GO Biological Processes	19	GO:0120035	regulation of plasma membrane bounded cell projection organization	19_GO:0050789 regulation of biological process	-12	2.4	8.1	30211	622	1550	76	4.9	0.55	25|627|960|1000|1540|1942|1948|2049|2670|2823|3309|3383|3397|3655|3815|4067|4155|4651|4803|5205|5337|5357|5364|5800|5997|6091|6474|6911|7025|7043|7422|7474|7504|7869|8507|8814|8837|9314|9760|9863|10458|10512|10602|10938|22891|22943|23072|23129|23251|23258|27124|54874|55604|57463|57520|57715|64218|65009|65078|79625|80128|83478|84879|112755|114788|114798|115948|146206|154141|157285|221914|223117|34…	ABL1|BDNF|CD44|CDH2|CYLD|EFNA1|EFNB2|EPHB3|GFAP|GPM6A|HSPA5|ICAM1|ID1|ITGA6|KIT|LYN|MBP|MYO10|NGF|ATP8B1|PLD1|PLS1|PLXNB1|PTPRO|RGS2|ROBO1|SHOX2|TBX6|NR2F1|TGFB3|VEGFA|WNT5A|XK|SEMA3B|ENC1|CDKL1|CFLAR|KLF4|TOX|MAGI2|BAIAP2|SEMA3C|CDC42EP3|EHD1|ZNF365|DKK1|HECW1|PLXND1|MINAR1|DENND5A|INPP5J|FNBP1L|CARMIL1|AMIGO1|HECW2|SEMA4G|SEMA4A|NDRG4|RTN4R|NDNF|TRIM46|ARHGAP24|MFSD2A|STX1B|CSMD3|SLITRK1|ODAD3|…	-9.4	MyList
GO Biological Processes	19	GO:0032479	regulation of type I interferon production	19_GO:0032501 multicellular organismal process	-12	5.2	9.6	30211	98	1550	26	1.7	0.33	661|1540|3659|3663|3665|4321|4615|4938|4939|4940|5971|6737|6772|7098|8767|9111|9636|10475|11277|23220|23586|26191|51284|64135|79132|730249	POLR3D|CYLD|IRF1|IRF5|IRF7|MMP12|MYD88|OAS1|OAS2|OAS3|RELB|TRIM21|STAT1|TLR3|RIPK2|NMI|ISG15|TRIM38|TREX1|DTX4|DDX58|PTPN22|TLR7|IFIH1|DHX58|ACOD1	-9.4	MyList
GO Biological Processes	19	GO:0072503	cellular divalent inorganic cation homeostasis	19_GO:0065007 biological regulation	-12	2.7	8.3	30211	456	1550	62	4	0.5	25|133|134|146|490|623|624|719|783|784|825|859|1901|1903|1906|2149|2151|2247|2624|2769|2852|3351|3357|3627|3709|3718|4489|4493|4499|4501|4502|4987|5021|5026|5156|5371|5732|5734|5739|5745|5788|6288|6348|6352|6354|6355|6373|6781|7225|7421|7474|7504|7779|8989|9709|23516|51554|51738|64116|79572|114897|284612	ABL1|ADM|ADORA1|ADRA1D|ATP2B1|BDKRB1|BDKRB2|C3AR1|CACNB2|CACNB3|CAPN3|CAV3|S1PR1|S1PR3|EDN1|F2R|F2RL2|FGF2|GATA2|GNA15|GPER1|HTR1B|HTR2B|CXCL10|ITPR2|JAK3|MT1A|MT1E|MT1M|MT1X|MT2A|OPRL1|OXTR|P2RX5|PDGFRA|PML|PTGER2|PTGER4|PTGIR|PTH1R|PTPRC|SAA1|CCL3|CCL5|CCL7|CCL8|CXCL11|STC1|TRPC6|VDR|WNT5A|XK|SLC30A1|TRPA1|HERPUD1|SLC39A14|ACKR4|GHRL|SLC39A8|ATP13A3|C1QTNF1|SYPL2	-9.4	MyList
GO Biological Processes	19	GO:0043549	regulation of kinase activity	19_GO:0008152 metabolic process	-12	2.2	8	30211	763	1550	87	5.6	0.58	25|103|134|135|374|634|652|685|859|868|972|1028|1116|1435|1647|1839|1906|1942|2044|2049|2050|2065|2069|2081|2247|2321|3084|3357|3481|3553|3815|4067|4217|4515|4683|4739|5156|5208|5468|5606|5788|5794|5800|5997|6091|6352|7023|7026|7098|7124|7128|7422|7424|7453|7474|7855|8091|8795|8835|8844|9021|9052|9079|10019|10333|10636|22943|26191|28951|28984|29775|50507|51191|51704|51738|56833|56892|79007|84254|…	ABL1|ADAR|ADORA1|ADORA2A|AREG|CEACAM1|BMP4|BTC|CAV3|CBLB|CD74|CDKN1C|CHI3L1|CSF1|GADD45A|HBEGF|EDN1|EFNA1|EPHA5|EPHB3|EPHB4|ERBB3|EREG|ERN1|FGF2|FLT1|NRG1|HTR2B|IGF2|IL1B|KIT|LYN|MAP3K5|MTCP1|NBN|NEDD9|PDGFRA|PFKFB2|PPARG|MAP2K3|PTPRC|PTPRH|PTPRO|RGS2|ROBO1|CCL5|TFAP4|NR2F2|TLR3|TNF|TNFAIP3|VEGFA|VEGFC|WARS1|WNT5A|FZD5|HMGA2|TNFRSF10B|SOCS2|KSR1|SOCS3|GPRC5A|LDB2|SH2B3|TLR6|RGS14|DKK1|PTPN22|TRIB…	-9.4	MyList
GO Biological Processes	19	GO:0009792	embryo development ending in birth or egg hatching	19_GO:0032502 developmental process	-12	2.3	8	30211	650	1550	78	5	0.56	25|133|367|579|639|652|1028|1051|1437|1906|1999|2247|2535|2624|2637|2697|2736|3091|3198|3200|3201|3202|3203|3204|3205|3215|3221|3223|3235|3481|3714|3726|3880|3976|4222|4223|4323|4683|4824|5087|5156|5745|5916|6474|6608|6615|6662|6665|6911|6935|7026|7043|7422|7474|7477|7779|7855|7942|8531|9021|9464|10361|10512|22943|23462|23764|28514|55897|56243|57619|80312|84870|113026|116039|130497|144165|154796|…	ABL1|ADM|AR|NKX3-2|PRDM1|BMP4|CDKN1C|CEBPB|CSF2|EDN1|ELF3|FGF2|FZD2|GATA2|GBX2|GJA1|GLI2|HIF1A|HOXA1|HOXA3|HOXA4|HOXA5|HOXA6|HOXA7|HOXA9|HOXB5|HOXC4|HOXC6|HOXD9|IGF2|JAG2|JUNB|KRT19|LIF|MEOX1|MEOX2|MMP14|NBN|NKX3-1|PBX1|PDGFRA|PTH1R|RARG|SHOX2|SMO|SNAI1|SOX9|SOX15|TBX6|ZEB1|NR2F2|TGFB3|VEGFA|WNT5A|WNT7B|SLC30A1|FZD5|TFEB|YBX3|SOCS3|HAND2|NPM2|SEMA3C|DKK1|HEY1|MAFF|DLL1|MESP1|KIAA1217|SHROOM3|TET1…	-9.3	MyList
GO Biological Processes	19	GO:1901652	response to peptide	19_GO:0050896 response to stimulus	-12	2.7	8.3	30211	434	1550	60	3.9	0.49	15|88|133|374|445|634|837|1583|1906|2069|2308|2697|2852|3177|3383|3397|3481|3663|3718|3795|4067|4160|4314|4318|4321|4790|4792|5021|5468|5641|5743|6513|6772|6773|6775|6776|7124|7128|7352|7412|7494|8013|8767|8835|8837|9734|9882|10014|10333|10458|10603|23236|23516|26191|28999|51274|84327|84709|87178|114814	AANAT|ACTN2|ADM|AREG|ASS1|CEACAM1|CASP4|CYP11A1|EDN1|EREG|FOXO1|GJA1|GPER1|SLC29A2|ICAM1|ID1|IGF2|IRF5|JAK3|KHK|LYN|MC4R|MMP3|MMP9|MMP12|NFKB1|NFKBIA|OXTR|PPARG|LGMN|PTGS2|SLC2A1|STAT1|STAT2|STAT4|STAT5A|TNF|TNFAIP3|UCP3|VCAM1|XBP1|NR4A3|RIPK2|SOCS2|CFLAR|HDAC9|TBC1D4|HDAC5|TLR6|BAIAP2|SH2B2|PLCB1|SLC39A14|PTPN22|KLF15|KLF3|ZBED3|MGARP|PNPT1|GNRHR2	-9.3	MyList
GO Biological Processes	19	GO:0031344	regulation of cell projection organization	19_GO:0050789 regulation of biological process	-11	2.3	8	30211	639	1550	77	5	0.55	25|627|960|1000|1540|1942|1948|2049|2670|2823|3309|3383|3397|3655|3815|4067|4155|4343|4651|4803|5205|5337|5357|5364|5800|5997|6091|6474|6911|7025|7043|7422|7474|7504|7869|8507|8814|8837|9314|9760|9863|10458|10512|10602|10938|22891|22943|23072|23129|23251|23258|27124|54874|55604|57463|57520|57715|64218|65009|65078|79625|80128|83478|84879|112755|114788|114798|115948|146206|154141|157285|221914|2231…	ABL1|BDNF|CD44|CDH2|CYLD|EFNA1|EFNB2|EPHB3|GFAP|GPM6A|HSPA5|ICAM1|ID1|ITGA6|KIT|LYN|MBP|MOV10|MYO10|NGF|ATP8B1|PLD1|PLS1|PLXNB1|PTPRO|RGS2|ROBO1|SHOX2|TBX6|NR2F1|TGFB3|VEGFA|WNT5A|XK|SEMA3B|ENC1|CDKL1|CFLAR|KLF4|TOX|MAGI2|BAIAP2|SEMA3C|CDC42EP3|EHD1|ZNF365|DKK1|HECW1|PLXND1|MINAR1|DENND5A|INPP5J|FNBP1L|CARMIL1|AMIGO1|HECW2|SEMA4G|SEMA4A|NDRG4|RTN4R|NDNF|TRIM46|ARHGAP24|MFSD2A|STX1B|CSMD3|SLITRK1|…	-9.3	MyList
Reactome Gene Sets	6	R-HSA-373076	Class A/1 (Rhodopsin-like receptors)		-11	3	8.4	30211	335	1550	51	3.3	0.45	134|135|146|623|624|718|719|885|1129|1901|1903|1906|2149|2151|2852|2863|2919|2920|2921|2925|3351|3357|3576|3627|4160|4987|5021|5732|5734|5739|6019|6288|6347|6348|6351|6352|6354|6364|6372|6373|6374|6751|7504|8111|8862|9283|9294|9890|51554|51738|58191	ADORA1|ADORA2A|ADRA1D|BDKRB1|BDKRB2|C3|C3AR1|CCK|CHRM2|S1PR1|S1PR3|EDN1|F2R|F2RL2|GPER1|GPR39|CXCL1|CXCL2|CXCL3|GRPR|HTR1B|HTR2B|CXCL8|CXCL10|MC4R|OPRL1|OXTR|PTGER2|PTGER4|PTGIR|RLN2|SAA1|CCL2|CCL3|CCL4|CCL5|CCL7|CCL20|CXCL6|CXCL11|CXCL5|SSTR1|XK|GPR68|APLN|GPR37L1|S1PR2|PLPPR4|ACKR4|GHRL|CXCL16	-9.3	MyList
GO Biological Processes	19	GO:0030879	mammary gland development	19_GO:0032502 developmental process	-11	4.6	9.3	30211	123	1550	29	1.9	0.34	367|374|652|1051|1435|1588|1999|2247|2697|2736|3084|3091|3099|3177|3202|3235|3398|5021|5371|6608|6662|6776|7043|7421|7422|7474|7477|8835|8862	AR|AREG|BMP4|CEBPB|CSF1|CYP19A1|ELF3|FGF2|GJA1|GLI2|NRG1|HIF1A|HK2|SLC29A2|HOXA5|HOXD9|ID2|OXTR|PML|SMO|SOX9|STAT5A|TGFB3|VDR|VEGFA|WNT5A|WNT7B|SOCS2|APLN	-9.3	MyList
KEGG Pathway	24	hsa05171	Coronavirus disease - COVID-19		-11	3.4	8.7	30211	232	1550	41	2.6	0.41	103|629|715|716|717|718|719|834|1437|1440|1839|3455|3553|3569|3576|3592|3627|4312|4314|4599|4600|4615|4790|4792|4793|4938|4939|4940|5293|5610|6347|6772|6773|7098|7124|9636|9641|23586|51284|64135|114548	ADAR|CFB|C1R|C1S|C2|C3|C3AR1|CASP1|CSF2|CSF3|HBEGF|IFNAR2|IL1B|IL6|CXCL8|IL12A|CXCL10|MMP1|MMP3|MX1|MX2|MYD88|NFKB1|NFKBIA|NFKBIB|OAS1|OAS2|OAS3|PIK3CD|EIF2AK2|CCL2|STAT1|STAT2|TLR3|TNF|ISG15|IKBKE|DDX58|TLR7|IFIH1|NLRP3	-9.3	MyList
GO Biological Processes	19	GO:0002221	pattern recognition receptor signaling pathway	19_GO:0002376 immune system process	-11	5.5	9.7	30211	85	1550	24	1.5	0.31	1520|1540|3656|3665|4067|4615|4792|4938|4940|7098|7124|7128|8767|9111|10318|10333|23180|23586|51284|64135|79931|81622|92610|144811	CTSS|CYLD|IRAK2|IRF7|LYN|MYD88|NFKBIA|OAS1|OAS3|TLR3|TNF|TNFAIP3|RIPK2|NMI|TNIP1|TLR6|RFTN1|DDX58|TLR7|IFIH1|TNIP3|UNC93B1|TIFA|LACC1	-9.2	MyList
GO Biological Processes	19	GO:1902532	negative regulation of intracellular signal transduction	19_GO:0023052 signaling	-11	2.5	8.1	30211	543	1550	69	4.5	0.52	25|467|624|637|652|859|960|972|1540|1827|1846|1850|1942|2308|2633|2852|3091|3430|3553|3976|4067|4318|4582|4987|5270|5329|5468|5563|5606|5743|5788|5997|6591|6615|6648|6772|7128|7494|8000|8382|8531|8876|9111|9709|9863|10017|10019|10105|10133|10318|10347|10385|10636|23251|23286|26191|54541|55075|79132|79931|80149|80237|83478|114548|153769|154043|154743|219790|407006	ABL1|ATF3|BDKRB2|BID|BMP4|CAV3|CD44|CD74|CYLD|RCAN1|DUSP4|DUSP8|EFNA1|FOXO1|GBP1|GPER1|HIF1A|IFI35|IL1B|LIF|LYN|MMP9|MUC1|OPRL1|SERPINE2|PLAUR|PPARG|PRKAA2|MAP2K3|PTGS2|PTPRC|RGS2|SNAI2|SNAI1|SOD2|STAT1|TNFAIP3|XBP1|PSCA|NME5|YBX3|VNN1|NMI|HERPUD1|MAGI2|BCL2L10|SH2B3|PPIF|OPTN|TNIP1|ABCA7|BTN2A2|RGS14|MINAR1|WWC1|PTPN22|DDIT4|UACA|DHX58|TNIP3|ZC3H12A|ELL3|ARHGAP24|NLRP3|SH3RF2|CNKSR3|BMT2|RTKN2|M…	-9.2	MyList
GO Biological Processes	19	GO:0032944	regulation of mononuclear cell proliferation	19_GO:0050789 regulation of biological process	-11	3.4	8.7	30211	233	1550	41	2.6	0.41	196|652|868|972|1051|1435|3133|3481|3552|3553|3569|3574|3592|3594|3620|3659|3718|3965|4067|4615|5788|6352|7133|7292|7412|7940|8767|8995|10148|10385|10673|11151|23308|26191|27242|29126|57829|64115|80380|259307|283234	AHR|BMP4|CBLB|CD74|CEBPB|CSF1|HLA-E|IGF2|IL1A|IL1B|IL6|IL7|IL12A|IL12RB1|IDO1|IRF1|JAK3|LGALS9|LYN|MYD88|PTPRC|CCL5|TNFRSF1B|TNFSF4|VCAM1|LST1|RIPK2|TNFSF18|EBI3|BTN2A2|TNFSF13B|CORO1A|ICOSLG|PTPN22|TNFRSF21|CD274|ZP4|VSIR|PDCD1LG2|IL4I1|CCDC88B	-9.2	MyList
KEGG Pathway	24	hsa04217	Necroptosis		-11	4	9	30211	159	1550	33	2.1	0.37	329|330|637|834|1540|2495|3013|3455|3460|3552|3553|3718|5610|6772|6773|6775|6776|7098|7124|7128|8335|8605|8743|8795|8837|8969|10616|55506|81030|90865|114548|197259|100137049	BIRC2|BIRC3|BID|CASP1|CYLD|FTH1|H2AC7|IFNAR2|IFNGR2|IL1A|IL1B|JAK3|EIF2AK2|STAT1|STAT2|STAT4|STAT5A|TLR3|TNF|TNFAIP3|H2AC4|PLA2G4C|TNFSF10|TNFRSF10B|CFLAR|H2AC11|RBCK1|MACROH2A2|ZBP1|IL33|NLRP3|MLKL|PLA2G4B	-9.1	MyList
WikiPathways	27	WP4868	Type I interferon induction and signaling during SARS-CoV-2 infection		-11	9.4	11	30211	31	1550	15	0.97	0.25	3455|3665|4615|4938|4939|4940|5610|6772|6773|7098|9641|10333|23586|51284|64135	IFNAR2|IRF7|MYD88|OAS1|OAS2|OAS3|EIF2AK2|STAT1|STAT2|TLR3|IKBKE|TLR6|DDX58|TLR7|IFIH1	-9.1	MyList
GO Biological Processes	19	GO:0060284	regulation of cell development	19_GO:0032502 developmental process	-11	2.5	8	30211	500	1550	65	4.2	0.51	25|627|652|859|1903|2633|2670|2852|3037|3091|3397|3398|3552|3553|3569|3815|3976|4067|4155|4654|4739|4803|5270|5364|5744|6091|6474|6604|6608|6911|7124|7133|7422|7424|7474|7869|8111|9283|9294|9734|10458|10512|10636|22891|23129|23236|23462|25893|28514|54567|55604|56833|57463|57715|64218|65078|79365|80128|80237|84630|114798|144347|146433|223117|407006	ABL1|BDNF|BMP4|CAV3|S1PR3|GBP1|GFAP|GPER1|HAS2|HIF1A|ID1|ID2|IL1A|IL1B|IL6|KIT|LIF|LYN|MBP|MYOD1|NEDD9|NGF|SERPINE2|PLXNB1|PTHLH|ROBO1|SHOX2|SMARCD3|SMO|TBX6|TNF|TNFRSF1B|VEGFA|VEGFC|WNT5A|SEMA3B|GPR68|GPR37L1|S1PR2|HDAC9|BAIAP2|SEMA3C|RGS14|ZNF365|PLXND1|PLCB1|HEY1|TRIM58|DLL1|DLL4|CARMIL1|SLAMF8|AMIGO1|SEMA4G|SEMA4A|RTN4R|BHLHE41|TRIM46|ELL3|TTBK1|SLITRK1|RFLNA|IL34|SEMA3D|MIR221	-9.1	MyList
KEGG Pathway	24	hsa04657	IL-17 signaling pathway		-11	5.2	9.4	30211	94	1550	25	1.6	0.32	1051|1437|1440|2919|2920|2921|3553|3569|3576|3627|4312|4314|4318|4790|4792|5743|6347|6354|6364|6372|6374|7124|7128|9641|257397	CEBPB|CSF2|CSF3|CXCL1|CXCL2|CXCL3|IL1B|IL6|CXCL8|CXCL10|MMP1|MMP3|MMP9|NFKB1|NFKBIA|PTGS2|CCL2|CCL7|CCL20|CXCL6|CXCL5|TNF|TNFAIP3|IKBKE|TAB3	-9.1	MyList
GO Biological Processes	19	GO:0072507	divalent inorganic cation homeostasis	19_GO:0065007 biological regulation	-11	2.6	8	30211	478	1550	63	4.1	0.5	25|133|134|146|490|623|624|719|783|784|825|859|1594|1901|1903|1906|2149|2151|2247|2624|2769|2852|3351|3357|3627|3709|3718|4489|4493|4499|4501|4502|4987|5021|5026|5156|5371|5732|5734|5739|5745|5788|6288|6348|6352|6354|6355|6373|6781|7225|7421|7474|7504|7779|8989|9709|23516|51554|51738|64116|79572|114897|284612	ABL1|ADM|ADORA1|ADRA1D|ATP2B1|BDKRB1|BDKRB2|C3AR1|CACNB2|CACNB3|CAPN3|CAV3|CYP27B1|S1PR1|S1PR3|EDN1|F2R|F2RL2|FGF2|GATA2|GNA15|GPER1|HTR1B|HTR2B|CXCL10|ITPR2|JAK3|MT1A|MT1E|MT1M|MT1X|MT2A|OPRL1|OXTR|P2RX5|PDGFRA|PML|PTGER2|PTGER4|PTGIR|PTH1R|PTPRC|SAA1|CCL3|CCL5|CCL7|CCL8|CXCL11|STC1|TRPC6|VDR|WNT5A|XK|SLC30A1|TRPA1|HERPUD1|SLC39A14|ACKR4|GHRL|SLC39A8|ATP13A3|C1QTNF1|SYPL2	-9	MyList
GO Biological Processes	19	GO:0002009	morphogenesis of an epithelium	19_GO:0032502 developmental process	-11	2.6	8.1	30211	443	1550	60	3.9	0.49	25|133|220|367|374|634|652|960|1435|1839|1906|1948|2247|2252|2295|2535|2637|2668|2697|2736|3091|3202|3371|3714|3909|3911|4321|4323|4824|5087|5371|5916|6608|6615|6662|6911|7421|7422|7424|7474|7477|7855|9021|9314|9464|10512|23129|23671|26249|28514|54567|55897|57619|65009|83478|84870|130497|144165|146206|157506	ABL1|ADM|ALDH1A3|AR|AREG|CEACAM1|BMP4|CD44|CSF1|HBEGF|EDN1|EFNB2|FGF2|FGF7|FOXF2|FZD2|GBX2|GDNF|GJA1|GLI2|HIF1A|HOXA5|TNC|JAG2|LAMA3|LAMA5|MMP12|MMP14|NKX3-1|PBX1|PML|RARG|SMO|SNAI1|SOX9|TBX6|VDR|VEGFA|VEGFC|WNT5A|WNT7B|FZD5|SOCS3|KLF4|HAND2|SEMA3C|PLXND1|TMEFF2|KLHL3|DLL1|DLL4|MESP1|SHROOM3|NDRG4|ARHGAP24|RSPO3|OSR1|PRICKLE1|CARMIL2|RDH10	-9	MyList
GO Biological Processes	19	GO:0061448	connective tissue development	19_GO:0032502 developmental process	-11	3.6	8.6	30211	208	1550	38	2.5	0.39	652|861|947|960|1116|1435|1906|2247|3091|3200|3202|3221|3696|4015|5745|5916|6474|6591|6615|6662|6781|6935|7474|7477|7494|8091|8200|9464|23516|51738|55553|57561|81792|85301|116039|130497|285590|389125	BMP4|RUNX1|CD34|CD44|CHI3L1|CSF1|EDN1|FGF2|HIF1A|HOXA3|HOXA5|HOXC4|ITGB8|LOX|PTH1R|RARG|SHOX2|SNAI2|SNAI1|SOX9|STC1|ZEB1|WNT5A|WNT7B|XBP1|HMGA2|GDF5|HAND2|SLC39A14|GHRL|SOX6|ARRDC3|ADAMTS12|COL27A1|OSR2|OSR1|SH3PXD2B|MUSTN1	-9	MyList
GO Biological Processes	19	GO:0003013	circulatory system process	19_GO:0032501 multicellular organismal process	-11	2.5	8	30211	492	1550	64	4.1	0.51	18|25|133|134|135|146|367|490|623|624|634|719|783|859|947|1359|1906|2006|2149|2643|2697|2852|3177|3351|3357|3398|3627|3672|3764|3781|4223|4973|4987|5021|5468|5606|5743|5800|5997|6506|6513|6542|6565|6580|6648|6772|7026|7124|7422|7424|8862|9283|10699|11277|28514|50507|51752|54407|54567|64167|80852|84879|143282|100506658	ABAT|ABL1|ADM|ADORA1|ADORA2A|ADRA1D|AR|ATP2B1|BDKRB1|BDKRB2|CEACAM1|C3AR1|CACNB2|CAV3|CD34|CPA3|EDN1|ELN|F2R|GCH1|GJA1|GPER1|SLC29A2|HTR1B|HTR2B|ID2|CXCL10|ITGA1|KCNJ8|KCNN2|MEOX2|OLR1|OPRL1|OXTR|PPARG|MAP2K3|PTGS2|PTPRO|RGS2|SLC1A2|SLC2A1|SLC7A2|SLC15A2|SLC22A1|SOD2|STAT1|NR2F2|TNF|VEGFA|VEGFC|APLN|GPR37L1|CORIN|TREX1|DLL1|NOX4|ERAP1|SLC38A2|DLL4|ERAP2|GRIP2|MFSD2A|FGFBP3|OCLN	-8.9	MyList
GO Biological Processes	19	GO:0051345	positive regulation of hydrolase activity	19_GO:0065007 biological regulation	-11	2.4	7.9	30211	577	1550	71	4.6	0.53	637|668|834|843|1901|1942|2149|2247|2321|2769|2852|3357|3428|3655|3672|3815|3965|4067|4155|4217|4739|4824|5156|5330|5364|5371|5468|5641|5721|5788|5900|5999|6091|6347|6348|6351|6352|6354|6355|6364|7023|7124|7422|7474|8743|8767|8837|9447|9863|9882|10017|10235|10636|11033|23158|23348|26084|27141|55075|55357|55803|64115|65078|79774|80758|83478|83595|84144|84630|114548|116984	BID|FOXL2|CASP1|CASP10|S1PR1|EFNA1|F2R|FGF2|FLT1|GNA15|GPER1|HTR2B|IFI16|ITGA6|ITGA1|KIT|LGALS9|LYN|MBP|MAP3K5|NEDD9|NKX3-1|PDGFRA|PLCB2|PLXNB1|PML|PPARG|LGMN|PSME2|PTPRC|RALGDS|RGS4|ROBO1|CCL2|CCL3|CCL4|CCL5|CCL7|CCL8|CCL20|TFAP4|TNF|VEGFA|WNT5A|TNFSF10|RIPK2|CFLAR|AIM2|MAGI2|TBC1D4|BCL2L10|RASGRP2|RGS14|ADAP1|TBC1D9|DOCK9|ARHGEF26|CIDEB|UACA|TBC1D2|ADAP2|VSIR|RTN4R|GRTP1|PRR7|ARHGAP24|SOX7|SYDE…	-8.9	MyList
GO Biological Processes	19	GO:0010632	regulation of epithelial cell migration	19_GO:0040011 locomotion	-11	3.1	8.3	30211	290	1550	46	3	0.43	25|634|652|1634|1647|1839|1906|1942|2113|2247|2252|2624|3037|3091|4163|4223|4318|5293|5468|5606|5641|5743|6662|6672|6776|6781|7026|7124|7422|7424|7474|8613|8828|9314|9734|10014|10769|27086|28984|29775|54567|57381|64218|80149|168667|407006	ABL1|CEACAM1|BMP4|DCN|GADD45A|HBEGF|EDN1|EFNA1|ETS1|FGF2|FGF7|GATA2|HAS2|HIF1A|MCC|MEOX2|MMP9|PIK3CD|PPARG|MAP2K3|LGMN|PTGS2|SOX9|SP100|STAT5A|STC1|NR2F2|TNF|VEGFA|VEGFC|WNT5A|PLPP3|NRP2|KLF4|HDAC9|HDAC5|PLK2|FOXP1|RGCC|CARD10|DLL4|RHOJ|SEMA4A|ZC3H12A|BMPER|MIR221	-8.9	MyList
GO Biological Processes	19	GO:2001233	regulation of apoptotic signaling pathway	19_GO:0023052 signaling	-11	2.8	8.1	30211	367	1550	53	3.4	0.46	135|367|467|624|627|637|652|960|972|1437|1540|2537|2668|2852|3091|3383|3552|3553|3574|3624|3655|4318|4582|4824|5054|5329|5371|5743|5788|6591|6615|6648|6672|7124|7128|7185|7494|8382|8531|8743|8837|8876|9709|10017|10105|10616|23604|50486|56624|80237|85450|219790|407006	ADORA2A|AR|ATF3|BDKRB2|BDNF|BID|BMP4|CD44|CD74|CSF2|CYLD|IFI6|GDNF|GPER1|HIF1A|ICAM1|IL1A|IL1B|IL7|INHBA|ITGA6|MMP9|MUC1|NKX3-1|SERPINE1|PLAUR|PML|PTGS2|PTPRC|SNAI2|SNAI1|SOD2|SP100|TNF|TNFAIP3|TRAF1|XBP1|NME5|YBX3|TNFSF10|CFLAR|VNN1|HERPUD1|BCL2L10|PPIF|RBCK1|DAPK2|G0S2|ASAH2|ELL3|ITPRIP|RTKN2|MIR221	-8.8	MyList
WikiPathways	27	WP75	Toll-like receptor signaling pathway		-11	4.9	9.2	30211	104	1550	26	1.7	0.33	1326|3455|3553|3569|3576|3592|3627|3663|3665|4615|4790|4792|4793|5293|5606|6348|6351|6352|6373|6772|7098|7124|9641|10333|51284|257397	MAP3K8|IFNAR2|IL1B|IL6|CXCL8|IL12A|CXCL10|IRF5|IRF7|MYD88|NFKB1|NFKBIA|NFKBIB|PIK3CD|MAP2K3|CCL3|CCL4|CCL5|CXCL11|STAT1|TLR3|TNF|IKBKE|TLR6|TLR7|TAB3	-8.8	MyList
GO Biological Processes	19	GO:0050670	regulation of lymphocyte proliferation	19_GO:0002376 immune system process	-11	3.4	8.5	30211	230	1550	40	2.6	0.4	196|652|868|972|1051|3133|3481|3552|3553|3569|3574|3592|3594|3620|3659|3718|3965|4067|4615|5788|6352|7133|7292|7412|7940|8767|8995|10148|10385|10673|11151|23308|26191|27242|29126|57829|64115|80380|259307|283234	AHR|BMP4|CBLB|CD74|CEBPB|HLA-E|IGF2|IL1A|IL1B|IL6|IL7|IL12A|IL12RB1|IDO1|IRF1|JAK3|LGALS9|LYN|MYD88|PTPRC|CCL5|TNFRSF1B|TNFSF4|VCAM1|LST1|RIPK2|TNFSF18|EBI3|BTN2A2|TNFSF13B|CORO1A|ICOSLG|PTPN22|TNFRSF21|CD274|ZP4|VSIR|PDCD1LG2|IL4I1|CCDC88B	-8.8	MyList
GO Biological Processes	19	GO:0010594	regulation of endothelial cell migration	19_GO:0040011 locomotion	-11	3.4	8.5	30211	230	1550	40	2.6	0.4	25|634|652|1634|1647|1906|1942|2113|2247|2624|3091|4223|5293|5468|5606|5641|5743|6672|6776|6781|7026|7124|7422|7424|7474|8613|8828|9314|9734|10014|10769|27086|28984|29775|54567|57381|64218|80149|168667|407006	ABL1|CEACAM1|BMP4|DCN|GADD45A|EDN1|EFNA1|ETS1|FGF2|GATA2|HIF1A|MEOX2|PIK3CD|PPARG|MAP2K3|LGMN|PTGS2|SP100|STAT5A|STC1|NR2F2|TNF|VEGFA|VEGFC|WNT5A|PLPP3|NRP2|KLF4|HDAC9|HDAC5|PLK2|FOXP1|RGCC|CARD10|DLL4|RHOJ|SEMA4A|ZC3H12A|BMPER|MIR221	-8.8	MyList
GO Biological Processes	19	GO:0032755	positive regulation of interleukin-6 production	19_GO:0048518 positive regulation of biological process	-11	5	9.2	30211	97	1550	25	1.6	0.32	972|2069|2149|3552|3553|3569|3965|4023|4155|4615|5452|7098|7124|7292|7474|7494|8767|10333|23586|51284|64135|90865|113277|338322|338382	CD74|EREG|F2R|IL1A|IL1B|IL6|LGALS9|LPL|MBP|MYD88|POU2F2|TLR3|TNF|TNFSF4|WNT5A|XBP1|RIPK2|TLR6|DDX58|TLR7|IFIH1|IL33|TMEM106A|NLRP10|RAB7B	-8.8	MyList
WikiPathways	27	WP4655	Cytosolic DNA-sensing pathway		-11	5.7	9.5	30211	75	1550	22	1.4	0.3	103|661|834|843|1540|3553|3569|3627|3665|4790|4792|4793|6351|6352|7706|9447|9636|9641|11277|23586|81030|90865	ADAR|POLR3D|CASP1|CASP10|CYLD|IL1B|IL6|CXCL10|IRF7|NFKB1|NFKBIA|NFKBIB|CCL4|CCL5|TRIM25|AIM2|ISG15|IKBKE|TREX1|DDX58|ZBP1|IL33	-8.8	MyList
GO Biological Processes	19	GO:0001667	ameboidal-type cell migration	19_GO:0040011 locomotion	-11	3.7	8.6	30211	183	1550	35	2.3	0.38	25|1000|1803|1906|1948|2050|2247|2637|2668|3091|3357|3397|3695|3815|3911|3964|5371|6091|6608|7422|7474|7869|8828|9404|9464|9839|10512|23129|55897|57449|57715|64218|84830|154796|223117	ABL1|CDH2|DPP4|EDN1|EFNB2|EPHB4|FGF2|GBX2|GDNF|HIF1A|HTR2B|ID1|ITGB7|KIT|LAMA5|LGALS8|PML|ROBO1|SMO|VEGFA|WNT5A|SEMA3B|NRP2|LPXN|HAND2|ZEB2|SEMA3C|PLXND1|MESP1|PLEKHG5|SEMA4G|SEMA4A|ADTRP|AMOT|SEMA3D	-8.7	MyList
KEGG Pathway	24	hsa05169	Epstein-Barr virus infection		-11	3.6	8.5	30211	202	1550	37	2.4	0.39	637|960|1647|3106|3112|3133|3134|3383|3455|3569|3627|3665|3718|4067|4615|4790|4791|4792|4793|4794|4938|4939|4940|5293|5606|5610|5971|6772|6773|6890|6891|6892|7124|7128|9636|9641|23586	BID|CD44|GADD45A|HLA-B|HLA-DOB|HLA-E|HLA-F|ICAM1|IFNAR2|IL6|CXCL10|IRF7|JAK3|LYN|MYD88|NFKB1|NFKB2|NFKBIA|NFKBIB|NFKBIE|OAS1|OAS2|OAS3|PIK3CD|MAP2K3|EIF2AK2|RELB|STAT1|STAT2|TAP1|TAP2|TAPBP|TNF|TNFAIP3|ISG15|IKBKE|DDX58	-8.7	MyList
GO Biological Processes	19	GO:0050900	leukocyte migration	19_GO:0040011 locomotion	-11	3.4	8.4	30211	232	1550	40	2.6	0.4	947|1901|2207|2321|2683|2919|2920|2921|3383|3553|3569|3576|3627|3655|3672|3679|3695|3815|4067|4318|4814|5142|5293|5800|6288|6347|6348|6351|6352|6354|6355|6364|6372|6373|6374|7124|7412|11151|56833|58191	CD34|S1PR1|FCER1G|FLT1|B4GALT1|CXCL1|CXCL2|CXCL3|ICAM1|IL1B|IL6|CXCL8|CXCL10|ITGA6|ITGA1|ITGA7|ITGB7|KIT|LYN|MMP9|NINJ1|PDE4B|PIK3CD|PTPRO|SAA1|CCL2|CCL3|CCL4|CCL5|CCL7|CCL8|CCL20|CXCL6|CXCL11|CXCL5|TNF|VCAM1|CORO1A|SLAMF8|CXCL16	-8.7	MyList
KEGG Pathway	24	hsa05162	Measles		-11	4.2	8.8	30211	139	1550	30	1.9	0.35	103|637|868|3306|3455|3552|3553|3569|3592|3665|3718|4599|4600|4615|4790|4792|4793|4938|4939|4940|5293|5610|6772|6773|6776|7128|9641|23586|51284|64135	ADAR|BID|CBLB|HSPA2|IFNAR2|IL1A|IL1B|IL6|IL12A|IRF7|JAK3|MX1|MX2|MYD88|NFKB1|NFKBIA|NFKBIB|OAS1|OAS2|OAS3|PIK3CD|EIF2AK2|STAT1|STAT2|STAT5A|TNFAIP3|IKBKE|DDX58|TLR7|IFIH1	-8.7	MyList
GO Biological Processes	19	GO:0040008	regulation of growth	19_GO:0040007 growth	-11	2.3	7.7	30211	660	1550	77	5	0.55	25|32|367|623|627|634|652|684|825|859|861|1410|1435|1594|1839|1906|2247|2697|2735|3091|3142|3371|3481|3574|3624|4323|4489|4493|4499|4501|4502|4654|4739|4803|5270|5357|5371|5641|5997|5999|6195|6608|6665|6776|7422|7474|7869|8091|8200|8531|8835|9021|10235|10409|10512|11054|22999|23180|23236|23251|23286|28514|51316|51738|57715|57731|58191|64218|65078|80128|81621|84879|87178|93649|220296|221481|223117	ABL1|ACACB|AR|BDKRB1|BDNF|CEACAM1|BMP4|BST2|CAPN3|CAV3|RUNX1|CRYAB|CSF1|CYP27B1|HBEGF|EDN1|FGF2|GJA1|GLI1|HIF1A|HLX|TNC|IGF2|IL7|INHBA|MMP14|MT1A|MT1E|MT1M|MT1X|MT2A|MYOD1|NEDD9|NGF|SERPINE2|PLS1|PML|LGMN|RGS2|RGS4|RPS6KA1|SMO|SOX15|STAT5A|VEGFA|WNT5A|SEMA3B|HMGA2|GDF5|YBX3|SOCS2|SOCS3|RASGRP2|BASP1|SEMA3C|OGFR|RIMS1|RFTN1|PLCB1|MINAR1|WWC1|DLL1|PLAC8|GHRL|SEMA4G|SPTBN4|CXCL16|SEMA4A|RTN4R|TRIM46…	-8.7	MyList
GO Biological Processes	19	GO:0000902	cell morphogenesis	19_GO:0032502 developmental process	-11	2.3	7.7	30211	673	1550	78	5	0.56	25|135|367|627|885|1008|1016|1906|1942|1948|1952|1955|2044|2049|2050|2115|2637|2668|2736|2823|3084|3575|3672|3695|3798|3909|3911|3914|3918|4130|4803|4891|4917|5357|5364|5699|5800|6091|6608|6781|7421|7422|7474|7477|7869|7940|8577|8828|9404|9890|10458|10512|22865|22891|22903|22943|23129|23218|23671|26050|26084|50507|54538|56956|57463|57619|57715|57731|64218|65078|80128|84879|114798|122786|139065|15…	ABL1|ADORA2A|AR|BDNF|CCK|CDH10|CDH18|EDN1|EFNA1|EFNB2|CELSR2|MEGF9|EPHA5|EPHB3|EPHB4|ETV1|GBX2|GDNF|GLI2|GPM6A|NRG1|IL7R|ITGA1|ITGB7|KIF5A|LAMA3|LAMA5|LAMB3|LAMC2|MAP1A|NGF|SLC11A2|NTN3|PLS1|PLXNB1|PSMB10|PTPRO|ROBO1|SMO|STC1|VDR|VEGFA|WNT5A|WNT7B|SEMA3B|LST1|TMEFF1|NRP2|LPXN|PLPPR4|BAIAP2|SEMA3C|SLITRK3|ZNF365|BTBD3|DKK1|PLXND1|NBEAL2|TMEFF2|SLITRK5|ARHGEF26|NOX4|ROBO4|LHX9|AMIGO1|SHROOM3|SEMA4G…	-8.7	MyList
GO Biological Processes	19	GO:0001666	response to hypoxia	19_GO:0050896 response to stimulus	-11	3.1	8.2	30211	274	1550	44	2.8	0.42	18|133|134|205|329|360|859|1263|1410|1803|1906|3091|3099|3552|3709|4323|4824|4891|5163|5328|5371|5468|5743|6326|6513|6648|6781|7043|7124|7352|7412|7422|7424|8837|10397|28984|54541|54583|79625|84709|93649|114757|114769|114990	ABAT|ADM|ADORA1|AK4|BIRC2|AQP3|CAV3|PLK3|CRYAB|DPP4|EDN1|HIF1A|HK2|IL1A|ITPR2|MMP14|NKX3-1|SLC11A2|PDK1|PLAU|PML|PPARG|PTGS2|SCN2A|SLC2A1|SOD2|STC1|TGFB3|TNF|UCP3|VCAM1|VEGFA|VEGFC|CFLAR|NDRG1|RGCC|DDIT4|EGLN1|NDNF|MGARP|MYOCD|CYGB|CARD16|VASN	-8.7	MyList
GO Biological Processes	19	GO:0051216	cartilage development	19_GO:0032502 developmental process	-11	4	8.7	30211	157	1550	32	2.1	0.36	652|861|960|1116|1906|2247|3091|3200|3202|3221|3696|5745|5916|6474|6591|6615|6662|6781|6935|7474|7477|8091|8200|9464|23516|51738|55553|81792|85301|116039|130497|389125	BMP4|RUNX1|CD44|CHI3L1|EDN1|FGF2|HIF1A|HOXA3|HOXA5|HOXC4|ITGB8|PTH1R|RARG|SHOX2|SNAI2|SNAI1|SOX9|STC1|ZEB1|WNT5A|WNT7B|HMGA2|GDF5|HAND2|SLC39A14|GHRL|SOX6|ADAMTS12|COL27A1|OSR2|OSR1|MUSTN1	-8.7	MyList
GO Biological Processes	19	GO:0030856	regulation of epithelial cell differentiation	19_GO:0032502 developmental process	-11	4	8.7	30211	157	1550	32	2.1	0.36	360|634|652|1028|1051|1594|1903|2247|2301|2668|3204|3397|3552|3553|3976|4318|5054|5920|6608|6662|6772|6935|7124|7421|7422|9294|23236|23764|28514|55506|55897|130497	AQP3|CEACAM1|BMP4|CDKN1C|CEBPB|CYP27B1|S1PR3|FGF2|FOXE3|GDNF|HOXA7|ID1|IL1A|IL1B|LIF|MMP9|SERPINE1|PLAAT4|SMO|SOX9|STAT1|ZEB1|TNF|VDR|VEGFA|S1PR2|PLCB1|MAFF|DLL1|MACROH2A2|MESP1|OSR1	-8.7	MyList
GO Biological Processes	19	GO:0050801	ion homeostasis	19_GO:0065007 biological regulation	-11	2.2	7.6	30211	754	1550	84	5.4	0.58	25|133|134|146|490|623|624|719|783|784|825|859|1080|1594|1634|1901|1903|1906|2149|2151|2247|2495|2537|2624|2697|2769|2852|3091|3351|3357|3552|3627|3709|3718|4489|4493|4499|4501|4502|4891|4987|5021|5026|5156|5172|5371|5732|5734|5739|5745|5788|6288|6348|6352|6354|6355|6373|6648|6781|7225|7421|7474|7504|7779|8989|9709|10723|23516|26249|26872|51312|51554|51738|56833|64116|79572|81894|83959|84561|8494…	ABL1|ADM|ADORA1|ADRA1D|ATP2B1|BDKRB1|BDKRB2|C3AR1|CACNB2|CACNB3|CAPN3|CAV3|CFTR|CYP27B1|DCN|S1PR1|S1PR3|EDN1|F2R|F2RL2|FGF2|FTH1|IFI6|GATA2|GJA1|GNA15|GPER1|HIF1A|HTR1B|HTR2B|IL1A|CXCL10|ITPR2|JAK3|MT1A|MT1E|MT1M|MT1X|MT2A|SLC11A2|OPRL1|OXTR|P2RX5|PDGFRA|SLC26A4|PML|PTGER2|PTGER4|PTGIR|PTH1R|PTPRC|SAA1|CCL3|CCL5|CCL7|CCL8|CXCL11|SOD2|STC1|TRPC6|VDR|WNT5A|XK|SLC30A1|TRPA1|HERPUD1|SLC12A7|SLC39A14|…	-8.6	MyList
Reactome Gene Sets	6	R-HSA-500792	GPCR ligand binding		-11	2.5	7.8	30211	467	1550	61	3.9	0.49	133|134|135|146|623|624|718|719|885|1129|1901|1903|1906|2015|2149|2151|2535|2852|2863|2919|2920|2921|2925|3351|3357|3576|3627|4160|4987|5021|5732|5734|5739|5744|5745|6019|6288|6347|6348|6351|6352|6354|6364|6372|6373|6374|6608|6751|7474|7477|7504|7855|8111|8862|9283|9294|9890|51554|51738|58191|90226	ADM|ADORA1|ADORA2A|ADRA1D|BDKRB1|BDKRB2|C3|C3AR1|CCK|CHRM2|S1PR1|S1PR3|EDN1|ADGRE1|F2R|F2RL2|FZD2|GPER1|GPR39|CXCL1|CXCL2|CXCL3|GRPR|HTR1B|HTR2B|CXCL8|CXCL10|MC4R|OPRL1|OXTR|PTGER2|PTGER4|PTGIR|PTHLH|PTH1R|RLN2|SAA1|CCL2|CCL3|CCL4|CCL5|CCL7|CCL20|CXCL6|CXCL11|CXCL5|SMO|SSTR1|WNT5A|WNT7B|XK|FZD5|GPR68|APLN|GPR37L1|S1PR2|PLPPR4|ACKR4|GHRL|CXCL16|UCN2	-8.6	MyList
WikiPathways	27	WP3624	Lung fibrosis		-11	6.2	9.6	30211	63	1550	20	1.3	0.29	1051|1437|1440|1906|2006|2247|2252|2920|3553|3569|3576|4318|4502|5328|5806|6347|6348|6351|6352|7124	CEBPB|CSF2|CSF3|EDN1|ELN|FGF2|FGF7|CXCL2|IL1B|IL6|CXCL8|MMP9|MT2A|PLAU|PTX3|CCL2|CCL3|CCL4|CCL5|TNF	-8.6	MyList
GO Biological Processes	19	GO:0036293	response to decreased oxygen levels	19_GO:0050896 response to stimulus	-11	3.1	8.1	30211	287	1550	45	2.9	0.43	18|133|134|205|329|360|859|1263|1410|1803|1906|3091|3099|3552|3709|4323|4824|4891|5021|5163|5328|5371|5468|5743|6326|6513|6648|6781|7043|7124|7352|7412|7422|7424|8837|10397|28984|54541|54583|79625|84709|93649|114757|114769|114990	ABAT|ADM|ADORA1|AK4|BIRC2|AQP3|CAV3|PLK3|CRYAB|DPP4|EDN1|HIF1A|HK2|IL1A|ITPR2|MMP14|NKX3-1|SLC11A2|OXTR|PDK1|PLAU|PML|PPARG|PTGS2|SCN2A|SLC2A1|SOD2|STC1|TGFB3|TNF|UCP3|VCAM1|VEGFA|VEGFC|CFLAR|NDRG1|RGCC|DDIT4|EGLN1|NDNF|MGARP|MYOCD|CYGB|CARD16|VASN	-8.5	MyList
GO Biological Processes	19	GO:0002687	positive regulation of leukocyte migration	19_GO:0040011 locomotion	-11	4.1	8.7	30211	141	1550	30	1.9	0.35	623|719|961|972|1435|1906|3383|3552|3569|3576|3592|3627|3965|4323|5054|5641|6348|6351|6352|6354|6355|6364|7124|7422|7424|7474|8784|8995|23604|146433	BDKRB1|C3AR1|CD47|CD74|CSF1|EDN1|ICAM1|IL1A|IL6|CXCL8|IL12A|CXCL10|LGALS9|MMP14|SERPINE1|LGMN|CCL3|CCL4|CCL5|CCL7|CCL8|CCL20|TNF|VEGFA|VEGFC|WNT5A|TNFRSF18|TNFSF18|DAPK2|IL34	-8.5	MyList
GO Biological Processes	19	GO:0070482	response to oxygen levels	19_GO:0050896 response to stimulus	-11	3	8.1	30211	309	1550	47	3	0.44	18|133|134|205|329|360|859|1263|1410|1803|1906|2308|3091|3099|3552|3709|4323|4654|4824|4891|5021|5163|5328|5371|5468|5743|6326|6513|6648|6781|7043|7124|7352|7412|7422|7424|8837|10397|28984|54541|54583|79625|84709|93649|114757|114769|114990	ABAT|ADM|ADORA1|AK4|BIRC2|AQP3|CAV3|PLK3|CRYAB|DPP4|EDN1|FOXO1|HIF1A|HK2|IL1A|ITPR2|MMP14|MYOD1|NKX3-1|SLC11A2|OXTR|PDK1|PLAU|PML|PPARG|PTGS2|SCN2A|SLC2A1|SOD2|STC1|TGFB3|TNF|UCP3|VCAM1|VEGFA|VEGFC|CFLAR|NDRG1|RGCC|DDIT4|EGLN1|NDNF|MGARP|MYOCD|CYGB|CARD16|VASN	-8.5	MyList
GO Biological Processes	19	GO:0055080	cation homeostasis	19_GO:0065007 biological regulation	-11	2.2	7.6	30211	692	1550	79	5.1	0.56	25|133|134|146|490|623|624|719|783|784|825|859|1080|1594|1901|1903|1906|2149|2151|2247|2495|2624|2769|2852|3091|3351|3357|3552|3627|3709|3718|4489|4493|4499|4501|4502|4891|4987|5021|5026|5156|5172|5371|5732|5734|5739|5745|5788|6288|6348|6352|6354|6355|6373|6648|6781|7225|7421|7474|7504|7779|8989|9709|10723|23516|26872|51312|51554|51738|56833|64116|79572|81894|83959|84561|114897|144811|282679|2846…	ABL1|ADM|ADORA1|ADRA1D|ATP2B1|BDKRB1|BDKRB2|C3AR1|CACNB2|CACNB3|CAPN3|CAV3|CFTR|CYP27B1|S1PR1|S1PR3|EDN1|F2R|F2RL2|FGF2|FTH1|GATA2|GNA15|GPER1|HIF1A|HTR1B|HTR2B|IL1A|CXCL10|ITPR2|JAK3|MT1A|MT1E|MT1M|MT1X|MT2A|SLC11A2|OPRL1|OXTR|P2RX5|PDGFRA|SLC26A4|PML|PTGER2|PTGER4|PTGIR|PTH1R|PTPRC|SAA1|CCL3|CCL5|CCL7|CCL8|CXCL11|SOD2|STC1|TRPC6|VDR|WNT5A|XK|SLC30A1|TRPA1|HERPUD1|SLC12A7|SLC39A14|STEAP1|SLC25A3…	-8.5	MyList
KEGG Pathway	24	hsa04061	Viral protein interaction with cytokine and cytokine receptor		-11	4.9	9	30211	100	1550	25	1.6	0.32	1435|2919|2920|2921|3569|3576|3627|6347|6348|6351|6352|6354|6355|6364|6372|6373|6374|7124|7133|8743|8795|11009|27178|51554|146433	CSF1|CXCL1|CXCL2|CXCL3|IL6|CXCL8|CXCL10|CCL2|CCL3|CCL4|CCL5|CCL7|CCL8|CCL20|CXCL6|CXCL11|CXCL5|TNF|TNFRSF1B|TNFSF10|TNFRSF10B|IL24|IL37|ACKR4|IL34	-8.5	MyList
Reactome Gene Sets	6	R-HSA-388396	GPCR downstream signalling		-11	2.3	7.6	30211	629	1550	74	4.8	0.54	133|134|135|146|623|624|718|719|885|1129|1607|1839|1903|1906|2149|2151|2769|2852|2863|2869|2919|2920|2921|2925|3351|3357|3576|3627|3709|4160|4314|4987|5021|5136|5142|5330|5364|5533|5732|5734|5739|5744|5745|5997|5999|6019|6195|6288|6351|6352|6364|6372|6373|6374|6751|7225|8111|8601|8786|8862|9162|9283|9294|10235|10636|11343|23236|26084|51738|53831|57449|58191|84254|196883	ADM|ADORA1|ADORA2A|ADRA1D|BDKRB1|BDKRB2|C3|C3AR1|CCK|CHRM2|DGKB|HBEGF|S1PR3|EDN1|F2R|F2RL2|GNA15|GPER1|GPR39|GRK5|CXCL1|CXCL2|CXCL3|GRPR|HTR1B|HTR2B|CXCL8|CXCL10|ITPR2|MC4R|MMP3|OPRL1|OXTR|PDE1A|PDE4B|PLCB2|PLXNB1|PPP3CC|PTGER2|PTGER4|PTGIR|PTHLH|PTH1R|RGS2|RGS4|RLN2|RPS6KA1|SAA1|CCL4|CCL5|CCL20|CXCL6|CXCL11|CXCL5|SSTR1|TRPC6|GPR68|RGS20|RGS11|APLN|DGKI|GPR37L1|S1PR2|RASGRP2|RGS14|MGLL|PLCB1|ARHG…	-8.5	MyList
GO Biological Processes	19	GO:0010942	positive regulation of cell death	19_GO:0048518 positive regulation of biological process	-11	2.3	7.6	30211	604	1550	72	4.6	0.53	25|133|134|135|220|467|637|652|668|1540|1647|1948|2308|2683|2852|3202|3399|3433|3569|3592|3620|3624|3655|3663|3672|3965|4067|4217|4314|4318|4824|5293|5371|5468|5743|5788|5916|6347|6348|6352|6648|7023|7043|7098|7124|7133|7421|7474|8091|8564|8739|8743|8767|8795|10333|10616|10628|22943|23604|25816|27063|27141|28984|29126|50486|51063|54541|79845|80149|80758|81030|407006	ABL1|ADM|ADORA1|ADORA2A|ALDH1A3|ATF3|BID|BMP4|FOXL2|CYLD|GADD45A|EFNB2|FOXO1|B4GALT1|GPER1|HOXA5|ID3|IFIT2|IL6|IL12A|IDO1|INHBA|ITGA6|IRF5|ITGA1|LGALS9|LYN|MAP3K5|MMP3|MMP9|NKX3-1|PIK3CD|PML|PPARG|PTGS2|PTPRC|RARG|CCL2|CCL3|CCL5|SOD2|TFAP4|TGFB3|TLR3|TNF|TNFRSF1B|VDR|WNT5A|HMGA2|KMO|HRK|TNFSF10|RIPK2|TNFRSF10B|TLR6|RBCK1|TXNIP|DKK1|DAPK2|TNFAIP8|ANKRD1|CIDEB|RGCC|CD274|G0S2|CALHM2|DDIT4|RNF122|ZC…	-8.5	MyList
GO Biological Processes	19	GO:0060326	cell chemotaxis	19_GO:0040011 locomotion	-11	3.5	8.3	30211	207	1550	37	2.4	0.39	1839|1901|2207|2321|2919|2920|2921|3553|3569|3576|3627|3672|3815|4015|4814|5142|5156|5293|5800|6288|6347|6348|6351|6352|6354|6355|6364|6372|6373|6374|7412|7422|11151|51554|56833|57449|58191	HBEGF|S1PR1|FCER1G|FLT1|CXCL1|CXCL2|CXCL3|IL1B|IL6|CXCL8|CXCL10|ITGA1|KIT|LOX|NINJ1|PDE4B|PDGFRA|PIK3CD|PTPRO|SAA1|CCL2|CCL3|CCL4|CCL5|CCL7|CCL8|CCL20|CXCL6|CXCL11|CXCL5|VCAM1|VEGFA|CORO1A|ACKR4|SLAMF8|PLEKHG5|CXCL16	-8.5	MyList
GO Biological Processes	19	GO:2001234	negative regulation of apoptotic signaling pathway	19_GO:0023052 signaling	-11	3.3	8.3	30211	227	1550	39	2.5	0.4	367|624|627|637|652|960|972|1437|2537|2668|3091|3383|3552|3553|3574|3655|4318|4582|5054|5329|5743|6591|6615|6648|7124|7128|7494|8382|8531|8837|8876|9709|10017|10105|56624|80237|85450|219790|407006	AR|BDKRB2|BDNF|BID|BMP4|CD44|CD74|CSF2|IFI6|GDNF|HIF1A|ICAM1|IL1A|IL1B|IL7|ITGA6|MMP9|MUC1|SERPINE1|PLAUR|PTGS2|SNAI2|SNAI1|SOD2|TNF|TNFAIP3|XBP1|NME5|YBX3|CFLAR|VNN1|HERPUD1|BCL2L10|PPIF|ASAH2|ELL3|ITPRIP|RTKN2|MIR221	-8.5	MyList
GO Biological Processes	19	GO:0045580	regulation of T cell differentiation	19_GO:0002376 immune system process	-11	4	8.6	30211	151	1550	31	2	0.36	25|639|652|861|972|2736|3142|3574|3575|3594|3659|3718|3902|3965|5788|6666|6935|7292|7494|8767|8876|9308|9580|9760|10385|64115|64332|80149|114548|259307|282618	ABL1|PRDM1|BMP4|RUNX1|CD74|GLI2|HLX|IL7|IL7R|IL12RB1|IRF1|JAK3|LAG3|LGALS9|PTPRC|SOX12|ZEB1|TNFSF4|XBP1|RIPK2|VNN1|CD83|SOX13|TOX|BTN2A2|VSIR|NFKBIZ|ZC3H12A|NLRP3|IL4I1|IFNL1	-8.5	MyList
GO Biological Processes	19	GO:0055065	metal ion homeostasis	19_GO:0065007 biological regulation	-10	2.3	7.6	30211	618	1550	73	4.7	0.54	25|133|134|146|490|623|624|719|783|784|825|859|1594|1901|1903|1906|2149|2151|2247|2495|2624|2769|2852|3091|3351|3357|3552|3627|3709|3718|4489|4493|4499|4501|4502|4891|4987|5021|5026|5156|5371|5732|5734|5739|5745|5788|6288|6348|6352|6354|6355|6373|6648|6781|7225|7421|7474|7504|7779|8989|9709|10723|23516|26872|51312|51554|51738|64116|79572|81894|84561|114897|284612	ABL1|ADM|ADORA1|ADRA1D|ATP2B1|BDKRB1|BDKRB2|C3AR1|CACNB2|CACNB3|CAPN3|CAV3|CYP27B1|S1PR1|S1PR3|EDN1|F2R|F2RL2|FGF2|FTH1|GATA2|GNA15|GPER1|HIF1A|HTR1B|HTR2B|IL1A|CXCL10|ITPR2|JAK3|MT1A|MT1E|MT1M|MT1X|MT2A|SLC11A2|OPRL1|OXTR|P2RX5|PDGFRA|PML|PTGER2|PTGER4|PTGIR|PTH1R|PTPRC|SAA1|CCL3|CCL5|CCL7|CCL8|CXCL11|SOD2|STC1|TRPC6|VDR|WNT5A|XK|SLC30A1|TRPA1|HERPUD1|SLC12A7|SLC39A14|STEAP1|SLC25A37|ACKR4|GHRL|…	-8.4	MyList
GO Biological Processes	19	GO:0045637	regulation of myeloid cell differentiation	19_GO:0002376 immune system process	-10	3.5	8.3	30211	208	1550	37	2.4	0.39	634|861|972|1051|1435|1440|2113|2124|2624|3091|3202|3204|3205|3398|3623|3624|3665|3976|4015|4067|4211|4286|4792|5916|6348|6772|7098|7124|7130|8111|8359|9636|27086|28514|146433|338382|407006	CEACAM1|RUNX1|CD74|CEBPB|CSF1|CSF3|ETS1|EVI2B|GATA2|HIF1A|HOXA5|HOXA7|HOXA9|ID2|INHA|INHBA|IRF7|LIF|LOX|LYN|MEIS1|MITF|NFKBIA|RARG|CCL3|STAT1|TLR3|TNF|TNFAIP6|GPR68|H4C1|ISG15|FOXP1|DLL1|IL34|RAB7B|MIR221	-8.4	MyList
GO Biological Processes	19	GO:0048660	regulation of smooth muscle cell proliferation	19_GO:0050789 regulation of biological process	-10	3.8	8.5	30211	170	1550	33	2.1	0.37	652|1839|1901|1906|2006|2069|2081|2247|2697|2852|3351|3398|3569|3592|4217|4318|4615|5468|5739|5743|6352|6648|6772|7043|7124|7128|8013|8862|9294|27086|65009|93649|407006	BMP4|HBEGF|S1PR1|EDN1|ELN|EREG|ERN1|FGF2|GJA1|GPER1|HTR1B|ID2|IL6|IL12A|MAP3K5|MMP9|MYD88|PPARG|PTGIR|PTGS2|CCL5|SOD2|STAT1|TGFB3|TNF|TNFAIP3|NR4A3|APLN|S1PR2|FOXP1|NDRG4|MYOCD|MIR221	-8.4	MyList
Reactome Gene Sets	6	R-HSA-1474244	Extracellular matrix organization		-10	3	8	30211	301	1550	46	3	0.43	634|652|825|960|961|999|1294|1300|1308|1520|1634|2006|2247|3371|3383|3386|3655|3672|3674|3679|3695|3696|3818|3909|3911|3914|3918|4015|4060|4237|4312|4314|4318|4319|4320|4321|4323|5054|7043|7092|7412|8200|8974|55214|85301|255631	CEACAM1|BMP4|CAPN3|CD44|CD47|CDH1|COL7A1|COL10A1|COL17A1|CTSS|DCN|ELN|FGF2|TNC|ICAM1|ICAM4|ITGA6|ITGA1|ITGA2B|ITGA7|ITGB7|ITGB8|KLKB1|LAMA3|LAMA5|LAMB3|LAMC2|LOX|LUM|MFAP2|MMP1|MMP3|MMP9|MMP10|MMP11|MMP12|MMP14|SERPINE1|TGFB3|TLL1|VCAM1|GDF5|P4HA2|P3H2|COL27A1|COL24A1	-8.4	MyList
GO Biological Processes	19	GO:0045859	regulation of protein kinase activity	19_GO:0008152 metabolic process	-10	2.3	7.6	30211	645	1550	75	4.8	0.55	25|103|134|135|374|634|652|685|859|868|1028|1116|1435|1647|1839|1906|1942|2065|2069|2081|2247|2321|3084|3357|3481|3553|3815|4067|4217|4515|4739|5468|5606|5788|5794|5800|5997|6091|6352|7023|7026|7098|7124|7128|7422|7424|7453|7474|7855|8091|8795|8844|9052|10019|10333|10636|22943|26191|28951|28984|29775|50507|51191|51704|51738|56892|79007|84254|84630|85417|93649|124790|146433|148932|374462	ABL1|ADAR|ADORA1|ADORA2A|AREG|CEACAM1|BMP4|BTC|CAV3|CBLB|CDKN1C|CHI3L1|CSF1|GADD45A|HBEGF|EDN1|EFNA1|ERBB3|EREG|ERN1|FGF2|FLT1|NRG1|HTR2B|IGF2|IL1B|KIT|LYN|MAP3K5|MTCP1|NEDD9|PPARG|MAP2K3|PTPRC|PTPRH|PTPRO|RGS2|ROBO1|CCL5|TFAP4|NR2F2|TLR3|TNF|TNFAIP3|VEGFA|VEGFC|WARS1|WNT5A|FZD5|HMGA2|TNFRSF10B|KSR1|GPRC5A|SH2B3|TLR6|RGS14|DKK1|PTPN22|TRIB2|RGCC|CARD10|NOX4|HERC5|GPRC5B|GHRL|TCIM|DBNDD1|CAMKK1|TT…	-8.4	MyList
GO Biological Processes	19	GO:2000027	regulation of animal organ morphogenesis	19_GO:0032502 developmental process	-10	4.3	8.7	30211	126	1550	28	1.8	0.34	25|367|652|859|947|1435|1906|1952|2247|2252|2535|2668|4982|6591|6608|6662|7124|7422|7474|9863|22943|55897|57664|64750|84870|89958|144165|147495	ABL1|AR|BMP4|CAV3|CD34|CSF1|EDN1|CELSR2|FGF2|FGF7|FZD2|GDNF|TNFRSF11B|SNAI2|SMO|SOX9|TNF|VEGFA|WNT5A|MAGI2|DKK1|MESP1|PLEKHA4|SMURF2|RSPO3|SAPCD2|PRICKLE1|APCDD1	-8.4	MyList
GO Biological Processes	19	GO:0022408	negative regulation of cell-cell adhesion	19_GO:0022610 biological adhesion	-10	3.5	8.3	30211	199	1550	36	2.3	0.38	18|25|135|445|634|652|861|868|972|999|1051|3142|3620|3659|3718|3902|3965|4155|5270|7292|7422|9314|10019|10385|26191|27242|28984|29126|64115|80149|80380|84830|114897|259307|282618|407006	ABAT|ABL1|ADORA2A|ASS1|CEACAM1|BMP4|RUNX1|CBLB|CD74|CDH1|CEBPB|HLX|IDO1|IRF1|JAK3|LAG3|LGALS9|MBP|SERPINE2|TNFSF4|VEGFA|KLF4|SH2B3|BTN2A2|PTPN22|TNFRSF21|RGCC|CD274|VSIR|ZC3H12A|PDCD1LG2|ADTRP|C1QTNF1|IL4I1|IFNL1|MIR221	-8.4	MyList
GO Biological Processes	19	GO:0051960	regulation of nervous system development	19_GO:0032502 developmental process	-10	2.6	7.7	30211	439	1550	58	3.7	0.48	627|1890|2049|2637|2670|2852|3091|3397|3398|3553|3569|3815|3976|4067|4155|4803|5021|5270|5364|5916|6091|6474|6604|6608|7124|7133|7422|7424|7474|7869|9283|10458|10512|10636|22865|22891|22943|23129|23462|27242|28514|51738|54567|57463|57715|64218|65078|79365|80128|80237|84630|114798|139065|146433|223117|347731|347902|407006	BDNF|TYMP|EPHB3|GBX2|GFAP|GPER1|HIF1A|ID1|ID2|IL1B|IL6|KIT|LIF|LYN|MBP|NGF|OXTR|SERPINE2|PLXNB1|RARG|ROBO1|SHOX2|SMARCD3|SMO|TNF|TNFRSF1B|VEGFA|VEGFC|WNT5A|SEMA3B|GPR37L1|BAIAP2|SEMA3C|RGS14|SLITRK3|ZNF365|DKK1|PLXND1|HEY1|TNFRSF21|DLL1|GHRL|DLL4|AMIGO1|SEMA4G|SEMA4A|RTN4R|BHLHE41|TRIM46|ELL3|TTBK1|SLITRK1|SLITRK4|IL34|SEMA3D|LRRTM3|AMIGO2|MIR221	-8.3	MyList
GO Biological Processes	19	GO:0032675	regulation of interleukin-6 production	19_GO:0032501 multicellular organismal process	-10	3.7	8.4	30211	172	1550	33	2.1	0.37	961|972|1051|2069|2149|3106|3552|3553|3569|3965|4023|4155|4615|5452|7098|7124|7128|7292|7474|7494|8767|10333|23586|26191|27178|51284|51738|64135|80149|90865|113277|338322|338382	CD47|CD74|CEBPB|EREG|F2R|HLA-B|IL1A|IL1B|IL6|LGALS9|LPL|MBP|MYD88|POU2F2|TLR3|TNF|TNFAIP3|TNFSF4|WNT5A|XBP1|RIPK2|TLR6|DDX58|PTPN22|IL37|TLR7|GHRL|IFIH1|ZC3H12A|IL33|TMEM106A|NLRP10|RAB7B	-8.3	MyList
Reactome Gene Sets	6	R-HSA-375276	Peptide ligand-binding receptors		-10	3.5	8.2	30211	201	1550	36	2.3	0.38	623|624|718|719|885|1906|2149|2151|2852|2919|2920|2921|2925|3576|3627|4160|4987|5021|6019|6288|6347|6348|6351|6352|6354|6364|6372|6373|6374|6751|7504|8862|9283|51554|51738|58191	BDKRB1|BDKRB2|C3|C3AR1|CCK|EDN1|F2R|F2RL2|GPER1|CXCL1|CXCL2|CXCL3|GRPR|CXCL8|CXCL10|MC4R|OPRL1|OXTR|RLN2|SAA1|CCL2|CCL3|CCL4|CCL5|CCL7|CCL20|CXCL6|CXCL11|CXCL5|SSTR1|XK|APLN|GPR37L1|ACKR4|GHRL|CXCL16	-8.3	MyList
GO Biological Processes	19	GO:0051251	positive regulation of lymphocyte activation	19_GO:0002376 immune system process	-10	2.7	7.8	30211	371	1550	52	3.4	0.46	861|961|972|1326|1803|1948|2736|3112|3133|3134|3142|3481|3552|3553|3569|3574|3575|3592|3594|3601|3718|3965|4067|4323|4615|5788|6347|6352|6666|7292|7412|7494|8767|8876|9308|9580|9760|10148|10385|10673|11151|23149|23308|26191|29126|57829|64115|64332|80380|114548|259307|283234	RUNX1|CD47|CD74|MAP3K8|DPP4|EFNB2|GLI2|HLA-DOB|HLA-E|HLA-F|HLX|IGF2|IL1A|IL1B|IL6|IL7|IL7R|IL12A|IL12RB1|IL15RA|JAK3|LGALS9|LYN|MMP14|MYD88|PTPRC|CCL2|CCL5|SOX12|TNFSF4|VCAM1|XBP1|RIPK2|VNN1|CD83|SOX13|TOX|EBI3|BTN2A2|TNFSF13B|CORO1A|FCHO1|ICOSLG|PTPN22|CD274|ZP4|VSIR|NFKBIZ|PDCD1LG2|NLRP3|IL4I1|CCDC88B	-8.3	MyList
GO Biological Processes	19	GO:0030595	leukocyte chemotaxis	19_GO:0040011 locomotion	-10	4	8.5	30211	145	1550	30	1.9	0.35	1901|2207|2321|2919|2920|2921|3553|3569|3576|3627|3672|3815|4814|5142|5293|5800|6288|6347|6348|6351|6352|6354|6355|6364|6372|6373|6374|11151|56833|58191	S1PR1|FCER1G|FLT1|CXCL1|CXCL2|CXCL3|IL1B|IL6|CXCL8|CXCL10|ITGA1|KIT|NINJ1|PDE4B|PIK3CD|PTPRO|SAA1|CCL2|CCL3|CCL4|CCL5|CCL7|CCL8|CCL20|CXCL6|CXCL11|CXCL5|CORO1A|SLAMF8|CXCL16	-8.3	MyList
KEGG Pathway	24	hsa05202	Transcriptional misregulation in cancer		-10	3.6	8.3	30211	192	1550	35	2.3	0.38	329|330|597|861|1051|1437|1647|2115|2120|2308|2321|3205|3206|3398|3569|3576|3695|4005|4211|4286|4314|4318|4790|5087|5328|5371|5468|6935|7185|8013|8091|8356|51274|51513|64332	BIRC2|BIRC3|BCL2A1|RUNX1|CEBPB|CSF2|GADD45A|ETV1|ETV6|FOXO1|FLT1|HOXA9|HOXA10|ID2|IL6|CXCL8|ITGB7|LMO2|MEIS1|MITF|MMP3|MMP9|NFKB1|PBX1|PLAU|PML|PPARG|ZEB1|TRAF1|NR4A3|HMGA2|H3C12|KLF3|ETV7|NFKBIZ	-8.2	MyList
WikiPathways	27	WP2431	Spinal cord injury		-10	4.4	8.6	30211	120	1550	27	1.7	0.33	627|961|1647|1875|1948|2668|2670|2697|2919|2920|3383|3552|3553|3569|3576|3627|4050|4155|4318|4321|5743|6347|6662|7124|10673|50507|65078	BDNF|CD47|GADD45A|E2F5|EFNB2|GDNF|GFAP|GJA1|CXCL1|CXCL2|ICAM1|IL1A|IL1B|IL6|CXCL8|CXCL10|LTB|MBP|MMP9|MMP12|PTGS2|CCL2|SOX9|TNF|TNFSF13B|NOX4|RTN4R	-8.2	MyList
GO Biological Processes	19	GO:0010975	regulation of neuron projection development	19_GO:0032502 developmental process	-10	2.6	7.7	30211	431	1550	57	3.7	0.48	25|627|1000|1942|1948|2049|2670|3309|3397|3655|4067|4155|4803|5364|5800|5997|6091|6474|6911|7025|7422|7474|7504|7869|8507|8837|9314|9760|9863|10458|10512|10938|22891|22943|23072|23129|23251|23258|27124|57463|57520|57715|64218|65009|65078|79625|80128|84879|112755|114788|114798|154141|157285|221914|223117|349667|407006	ABL1|BDNF|CDH2|EFNA1|EFNB2|EPHB3|GFAP|HSPA5|ID1|ITGA6|LYN|MBP|NGF|PLXNB1|PTPRO|RGS2|ROBO1|SHOX2|TBX6|NR2F1|VEGFA|WNT5A|XK|SEMA3B|ENC1|CFLAR|KLF4|TOX|MAGI2|BAIAP2|SEMA3C|EHD1|ZNF365|DKK1|HECW1|PLXND1|MINAR1|DENND5A|INPP5J|AMIGO1|HECW2|SEMA4G|SEMA4A|NDRG4|RTN4R|NDNF|TRIM46|MFSD2A|STX1B|CSMD3|SLITRK1|MBOAT1|PRAG1|GPC2|SEMA3D|RTN4RL2|MIR221	-8.2	MyList
GO Biological Processes	19	GO:0002695	negative regulation of leukocyte activation	19_GO:0002376 immune system process	-10	3.5	8.2	30211	193	1550	35	2.3	0.38	135|634|652|861|868|972|1051|2852|3134|3142|3398|3598|3620|3623|3624|3659|3718|3902|3965|4067|5788|7128|7292|7940|10385|26191|27242|29126|64115|80149|80380|145581|259307|282618|284467	ADORA2A|CEACAM1|BMP4|RUNX1|CBLB|CD74|CEBPB|GPER1|HLA-F|HLX|ID2|IL13RA2|IDO1|INHA|INHBA|IRF1|JAK3|LAG3|LGALS9|LYN|PTPRC|TNFAIP3|TNFSF4|LST1|BTN2A2|PTPN22|TNFRSF21|CD274|VSIR|ZC3H12A|PDCD1LG2|LRFN5|IL4I1|IFNL1|TAFA3	-8.2	MyList
GO Biological Processes	19	GO:0007517	muscle organ development	19_GO:0032502 developmental process	-10	3	7.9	30211	285	1550	44	2.8	0.42	445|467|607|668|825|859|1410|1827|1839|1901|2006|2115|2535|3084|3142|3235|3399|3627|3679|3911|3976|4223|4654|6474|6608|7026|7474|7494|7504|8837|8912|9099|9242|10290|10324|10409|10472|23764|27063|28514|54567|55553|59269|347273	ASS1|ATF3|BCL9|FOXL2|CAPN3|CAV3|CRYAB|RCAN1|HBEGF|S1PR1|ELN|ETV1|FZD2|NRG1|HLX|HOXD9|ID3|CXCL10|ITGA7|LAMA5|LIF|MEOX2|MYOD1|SHOX2|SMO|NR2F2|WNT5A|XBP1|XK|CFLAR|CACNA1H|USP2|MSC|SPEG|KLHL41|BASP1|ZBTB18|MAFF|ANKRD1|DLL1|DLL4|SOX6|HIVEP3|CAVIN4	-8.2	MyList
GO Biological Processes	19	GO:0042129	regulation of T cell proliferation	19_GO:0002376 immune system process	-10	3.7	8.3	30211	174	1550	33	2.1	0.37	652|868|1051|3133|3481|3552|3553|3569|3594|3620|3659|3718|3965|5788|6352|7133|7292|7412|8767|8995|10148|10385|10673|11151|23308|26191|27242|29126|57829|64115|80380|259307|283234	BMP4|CBLB|CEBPB|HLA-E|IGF2|IL1A|IL1B|IL6|IL12RB1|IDO1|IRF1|JAK3|LGALS9|PTPRC|CCL5|TNFRSF1B|TNFSF4|VCAM1|RIPK2|TNFSF18|EBI3|BTN2A2|TNFSF13B|CORO1A|ICOSLG|PTPN22|TNFRSF21|CD274|ZP4|VSIR|PDCD1LG2|IL4I1|CCDC88B	-8.2	MyList
GO Biological Processes	19	GO:0002764	immune response-regulating signaling pathway	19_GO:0002376 immune system process	-10	2.8	7.8	30211	351	1550	50	3.2	0.45	25|719|784|868|1520|1540|2207|3656|3665|3815|4067|4615|4792|4938|4940|5142|5293|5788|7098|7124|7128|7462|8013|8767|9111|9473|10318|10333|10384|10385|10603|10616|11118|11119|11120|23149|23180|23308|23586|26191|27242|51284|54718|64135|64332|79931|80149|81622|92610|144811	ABL1|C3AR1|CACNB3|CBLB|CTSS|CYLD|FCER1G|IRAK2|IRF7|KIT|LYN|MYD88|NFKBIA|OAS1|OAS3|PDE4B|PIK3CD|PTPRC|TLR3|TNF|TNFAIP3|LAT2|NR4A3|RIPK2|NMI|THEMIS2|TNIP1|TLR6|BTN3A3|BTN2A2|SH2B2|RBCK1|BTN3A2|BTN3A1|BTN2A1|FCHO1|RFTN1|ICOSLG|DDX58|PTPN22|TNFRSF21|TLR7|BTN2A3P|IFIH1|NFKBIZ|TNIP3|ZC3H12A|UNC93B1|TIFA|LACC1	-8.2	MyList
GO Biological Processes	19	GO:0032652	regulation of interleukin-1 production	19_GO:0032501 multicellular organismal process	-10	4.2	8.6	30211	129	1550	28	1.8	0.34	634|834|1903|2149|3428|3569|3965|4023|4615|5371|6288|6348|7124|7128|7474|7855|8767|9447|10333|24145|27086|51738|80149|113277|114548|114769|115362|338322	CEACAM1|CASP1|S1PR3|F2R|IFI16|IL6|LGALS9|LPL|MYD88|PML|SAA1|CCL3|TNF|TNFAIP3|WNT5A|FZD5|RIPK2|AIM2|TLR6|PANX1|FOXP1|GHRL|ZC3H12A|TMEM106A|NLRP3|CARD16|GBP5|NLRP10	-8.1	MyList
GO Biological Processes	19	GO:0043281	regulation of cysteine-type endopeptidase activity involved in apoptotic process	19_GO:0008152 metabolic process	-10	3.4	8.1	30211	204	1550	36	2.3	0.38	135|329|330|637|668|834|843|960|1410|2149|2537|2852|3965|4217|4318|4824|5329|5371|5468|5743|6091|6195|7023|7124|7422|8743|8837|9314|10017|25816|27074|55075|80758|83595|114548|114769	ADORA2A|BIRC2|BIRC3|BID|FOXL2|CASP1|CASP10|CD44|CRYAB|F2R|IFI6|GPER1|LGALS9|MAP3K5|MMP9|NKX3-1|PLAUR|PML|PPARG|PTGS2|ROBO1|RPS6KA1|TFAP4|TNF|VEGFA|TNFSF10|CFLAR|KLF4|BCL2L10|TNFAIP8|LAMP3|UACA|PRR7|SOX7|NLRP3|CARD16	-8.1	MyList
GO Biological Processes	19	GO:1902107	positive regulation of leukocyte differentiation	19_GO:0002376 immune system process	-10	3.8	8.3	30211	157	1550	31	2	0.36	861|972|1435|2124|2736|3142|3398|3574|3575|3594|3601|3965|3976|4323|5788|6666|7124|7292|7494|8111|8767|8876|9308|9580|9760|10385|64115|64332|114548|146433|259307	RUNX1|CD74|CSF1|EVI2B|GLI2|HLX|ID2|IL7|IL7R|IL12RB1|IL15RA|LGALS9|LIF|MMP14|PTPRC|SOX12|TNF|TNFSF4|XBP1|GPR68|RIPK2|VNN1|CD83|SOX13|TOX|BTN2A2|VSIR|NFKBIZ|NLRP3|IL34|IL4I1	-8	MyList
GO Biological Processes	19	GO:1903708	positive regulation of hemopoiesis	19_GO:0002376 immune system process	-10	3.8	8.3	30211	157	1550	31	2	0.36	861|972|1435|2124|2736|3142|3398|3574|3575|3594|3601|3965|3976|4323|5788|6666|7124|7292|7494|8111|8767|8876|9308|9580|9760|10385|64115|64332|114548|146433|259307	RUNX1|CD74|CSF1|EVI2B|GLI2|HLX|ID2|IL7|IL7R|IL12RB1|IL15RA|LGALS9|LIF|MMP14|PTPRC|SOX12|TNF|TNFSF4|XBP1|GPR68|RIPK2|VNN1|CD83|SOX13|TOX|BTN2A2|VSIR|NFKBIZ|NLRP3|IL34|IL4I1	-8	MyList
WikiPathways	27	WP2864	Apoptosis-related network due to altered Notch3 in ovarian cancer		-10	6.5	9.4	30211	54	1550	18	1.2	0.27	25|840|2065|2081|2113|2149|3084|3309|3575|4790|7124|7185|8531|8767|8795|8870|9021|27242	ABL1|CASP7|ERBB3|ERN1|ETS1|F2R|NRG1|HSPA5|IL7R|NFKB1|TNF|TRAF1|YBX3|RIPK2|TNFRSF10B|IER3|SOCS3|TNFRSF21	-8	MyList
GO Biological Processes	19	GO:0050920	regulation of chemotaxis	19_GO:0040011 locomotion	-10	3.3	8	30211	225	1550	38	2.5	0.39	719|972|1435|1588|1803|1901|1906|1948|2247|3569|3576|3592|3627|3965|4067|5054|5156|5641|5800|6091|6347|6348|6351|6352|6354|7130|7422|7424|7474|7869|10512|23604|56833|57509|57715|64218|146433|223117	C3AR1|CD74|CSF1|CYP19A1|DPP4|S1PR1|EDN1|EFNB2|FGF2|IL6|CXCL8|IL12A|CXCL10|LGALS9|LYN|SERPINE1|PDGFRA|LGMN|PTPRO|ROBO1|CCL2|CCL3|CCL4|CCL5|CCL7|TNFAIP6|VEGFA|VEGFC|WNT5A|SEMA3B|SEMA3C|DAPK2|SLAMF8|MTUS1|SEMA4G|SEMA4A|IL34|SEMA3D	-8	MyList
GO Biological Processes	19	GO:0008015	blood circulation	19_GO:0032501 multicellular organismal process	-10	2.6	7.6	30211	400	1550	54	3.5	0.47	18|25|133|134|135|146|367|490|623|624|634|719|783|859|947|1359|1906|2006|2149|2643|2697|2852|3351|3357|3398|3627|3672|3764|3781|4223|4973|4987|5021|5468|5606|5743|5800|5997|6648|6772|7026|7124|7422|7424|8862|9283|10699|28514|51752|54567|64167|80852|143282|100506658	ABAT|ABL1|ADM|ADORA1|ADORA2A|ADRA1D|AR|ATP2B1|BDKRB1|BDKRB2|CEACAM1|C3AR1|CACNB2|CAV3|CD34|CPA3|EDN1|ELN|F2R|GCH1|GJA1|GPER1|HTR1B|HTR2B|ID2|CXCL10|ITGA1|KCNJ8|KCNN2|MEOX2|OLR1|OPRL1|OXTR|PPARG|MAP2K3|PTGS2|PTPRO|RGS2|SOD2|STAT1|NR2F2|TNF|VEGFA|VEGFC|APLN|GPR37L1|CORIN|DLL1|ERAP1|DLL4|ERAP2|GRIP2|FGFBP3|OCLN	-8	MyList
GO Biological Processes	19	GO:0070665	positive regulation of leukocyte proliferation	19_GO:0048518 positive regulation of biological process	-10	3.8	8.3	30211	158	1550	31	2	0.36	684|972|1435|1437|3133|3481|3552|3553|3569|3574|3592|3594|3718|3965|4067|4615|5788|6352|7292|7412|8767|10148|10673|11151|23308|26191|29126|57829|80380|146433|283234	BST2|CD74|CSF1|CSF2|HLA-E|IGF2|IL1A|IL1B|IL6|IL7|IL12A|IL12RB1|JAK3|LGALS9|LYN|MYD88|PTPRC|CCL5|TNFSF4|VCAM1|RIPK2|EBI3|TNFSF13B|CORO1A|ICOSLG|PTPN22|CD274|ZP4|PDCD1LG2|IL34|CCDC88B	-8	MyList
GO Biological Processes	19	GO:0050678	regulation of epithelial cell proliferation	19_GO:0050789 regulation of biological process	-9.9	2.7	7.6	30211	379	1550	52	3.4	0.46	367|374|634|652|1028|1948|2069|2247|2252|2301|2321|2624|2683|2735|3037|3091|3202|3357|3397|3481|3592|4163|4321|4824|5293|5468|6091|6347|6591|6608|6662|6772|6776|7026|7124|7128|7421|7422|7424|7474|7494|8013|8200|8828|8837|8862|28984|51738|54567|116039|130497|282679	AR|AREG|CEACAM1|BMP4|CDKN1C|EFNB2|EREG|FGF2|FGF7|FOXE3|FLT1|GATA2|B4GALT1|GLI1|HAS2|HIF1A|HOXA5|HTR2B|ID1|IGF2|IL12A|MCC|MMP12|NKX3-1|PIK3CD|PPARG|ROBO1|CCL2|SNAI2|SMO|SOX9|STAT1|STAT5A|NR2F2|TNF|TNFAIP3|VDR|VEGFA|VEGFC|WNT5A|XBP1|NR4A3|GDF5|NRP2|CFLAR|APLN|RGCC|GHRL|DLL4|OSR2|OSR1|AQP11	-7.9	MyList
GO Biological Processes	19	GO:0001655	urogenital system development	19_GO:0032502 developmental process	-9.9	2.8	7.7	30211	334	1550	48	3.1	0.44	231|367|445|639|652|947|1028|1588|1948|2049|2247|2624|2668|2735|2736|3037|3206|3371|3399|3764|3911|4774|4824|5087|5156|5800|5916|6608|6662|6772|7422|7474|7477|9244|9863|10409|11277|23129|23371|26249|28514|28999|93649|116039|130497|157506|168667|282679	AKR1B1|AR|ASS1|PRDM1|BMP4|CD34|CDKN1C|CYP19A1|EFNB2|EPHB3|FGF2|GATA2|GDNF|GLI1|GLI2|HAS2|HOXA10|TNC|ID3|KCNJ8|LAMA5|NFIA|NKX3-1|PBX1|PDGFRA|PTPRO|RARG|SMO|SOX9|STAT1|VEGFA|WNT5A|WNT7B|CRLF1|MAGI2|BASP1|TREX1|PLXND1|TNS2|KLHL3|DLL1|KLF15|MYOCD|OSR2|OSR1|RDH10|BMPER|AQP11	-7.9	MyList
GO Biological Processes	19	GO:0045862	positive regulation of proteolysis	19_GO:0048518 positive regulation of biological process	-9.9	2.7	7.6	30211	369	1550	51	3.3	0.45	637|668|825|834|843|859|1263|1942|2149|2161|2852|3428|3553|3818|3965|4067|4155|4217|4323|4824|5371|5468|5641|5721|6091|7023|7124|7133|8743|8767|8837|9447|9709|10017|10318|27141|28951|51667|55075|55908|64115|80149|80758|83595|84630|84900|114548|144165|153769|255488|344558	BID|FOXL2|CAPN3|CASP1|CASP10|CAV3|PLK3|EFNA1|F2R|F12|GPER1|IFI16|IL1B|KLKB1|LGALS9|LYN|MBP|MAP3K5|MMP14|NKX3-1|PML|PPARG|LGMN|PSME2|ROBO1|TFAP4|TNF|TNFRSF1B|TNFSF10|RIPK2|CFLAR|AIM2|HERPUD1|BCL2L10|TNIP1|CIDEB|TRIB2|NUB1|UACA|ANGPTL8|VSIR|ZC3H12A|PRR7|SOX7|TTBK1|RNFT2|NLRP3|PRICKLE1|SH3RF2|RNF144B|SH3RF3	-7.9	MyList
GO Biological Processes	19	GO:0098771	inorganic ion homeostasis	19_GO:0065007 biological regulation	-9.9	2.2	7.3	30211	702	1550	78	5	0.56	25|133|134|146|490|623|624|719|783|784|825|859|1080|1594|1901|1903|1906|2149|2151|2247|2495|2624|2769|2852|3091|3351|3357|3552|3627|3709|3718|4489|4493|4499|4501|4502|4891|4987|5021|5026|5156|5172|5371|5732|5734|5739|5745|5788|6288|6348|6352|6354|6355|6373|6648|6781|7225|7421|7474|7504|7779|8989|9709|10723|23516|26872|51312|51554|51738|56833|64116|79572|81894|84561|114897|144811|282679|284612	ABL1|ADM|ADORA1|ADRA1D|ATP2B1|BDKRB1|BDKRB2|C3AR1|CACNB2|CACNB3|CAPN3|CAV3|CFTR|CYP27B1|S1PR1|S1PR3|EDN1|F2R|F2RL2|FGF2|FTH1|GATA2|GNA15|GPER1|HIF1A|HTR1B|HTR2B|IL1A|CXCL10|ITPR2|JAK3|MT1A|MT1E|MT1M|MT1X|MT2A|SLC11A2|OPRL1|OXTR|P2RX5|PDGFRA|SLC26A4|PML|PTGER2|PTGER4|PTGIR|PTH1R|PTPRC|SAA1|CCL3|CCL5|CCL7|CCL8|CXCL11|SOD2|STC1|TRPC6|VDR|WNT5A|XK|SLC30A1|TRPA1|HERPUD1|SLC12A7|SLC39A14|STEAP1|SLC25A3…	-7.9	MyList
GO Biological Processes	19	GO:0002688	regulation of leukocyte chemotaxis	19_GO:0040011 locomotion	-9.9	4.2	8.4	30211	124	1550	27	1.7	0.33	719|972|1435|1588|1803|1906|3569|3576|3592|3627|3965|4067|5054|5641|6347|6348|6351|6352|6354|7130|7422|7424|7474|23604|56833|57509|146433	C3AR1|CD74|CSF1|CYP19A1|DPP4|EDN1|IL6|CXCL8|IL12A|CXCL10|LGALS9|LYN|SERPINE1|LGMN|CCL2|CCL3|CCL4|CCL5|CCL7|TNFAIP6|VEGFA|VEGFC|WNT5A|DAPK2|SLAMF8|MTUS1|IL34	-7.9	MyList
GO Biological Processes	19	GO:0006875	cellular metal ion homeostasis	19_GO:0065007 biological regulation	-9.8	2.3	7.4	30211	550	1550	66	4.3	0.51	25|133|134|146|490|623|624|719|783|784|825|859|1901|1903|1906|2149|2151|2247|2495|2624|2769|2852|3091|3351|3357|3552|3627|3709|3718|4489|4493|4499|4501|4502|4891|4987|5021|5026|5156|5371|5732|5734|5739|5745|5788|6288|6348|6352|6354|6355|6373|6781|7225|7421|7474|7504|7779|8989|9709|23516|51554|51738|64116|79572|114897|284612	ABL1|ADM|ADORA1|ADRA1D|ATP2B1|BDKRB1|BDKRB2|C3AR1|CACNB2|CACNB3|CAPN3|CAV3|S1PR1|S1PR3|EDN1|F2R|F2RL2|FGF2|FTH1|GATA2|GNA15|GPER1|HIF1A|HTR1B|HTR2B|IL1A|CXCL10|ITPR2|JAK3|MT1A|MT1E|MT1M|MT1X|MT2A|SLC11A2|OPRL1|OXTR|P2RX5|PDGFRA|PML|PTGER2|PTGER4|PTGIR|PTH1R|PTPRC|SAA1|CCL3|CCL5|CCL7|CCL8|CXCL11|STC1|TRPC6|VDR|WNT5A|XK|SLC30A1|TRPA1|HERPUD1|SLC39A14|ACKR4|GHRL|SLC39A8|ATP13A3|C1QTNF1|SYPL2	-7.8	MyList
GO Biological Processes	19	GO:0009952	anterior/posterior pattern specification	19_GO:0032502 developmental process	-9.7	3.3	7.9	30211	210	1550	36	2.3	0.38	652|1952|2114|2637|3200|3201|3202|3203|3204|3205|3206|3215|3221|3223|3235|4222|4223|4824|5013|5087|5916|6608|6911|7026|7474|7855|10194|10409|10512|22943|23424|23462|28514|55897|79365|130497	BMP4|CELSR2|ETS2|GBX2|HOXA3|HOXA4|HOXA5|HOXA6|HOXA7|HOXA9|HOXA10|HOXB5|HOXC4|HOXC6|HOXD9|MEOX1|MEOX2|NKX3-1|OTX1|PBX1|RARG|SMO|TBX6|NR2F2|WNT5A|FZD5|TSHZ1|BASP1|SEMA3C|DKK1|TDRD7|HEY1|DLL1|MESP1|BHLHE41|OSR1	-7.7	MyList
GO Biological Processes	19	GO:0007389	pattern specification process	19_GO:0032502 developmental process	-9.7	2.5	7.4	30211	443	1550	57	3.7	0.48	579|652|718|1906|1952|2114|2637|2697|2735|2736|3091|3200|3201|3202|3203|3204|3205|3206|3215|3221|3223|3235|4211|4222|4223|4824|5013|5087|5916|6604|6608|6615|6781|6911|6935|7026|7474|7477|7855|8828|9464|10194|10409|10512|22943|23424|23462|28514|54567|55130|55897|57619|65009|79365|115948|130497|199699	NKX3-2|BMP4|C3|EDN1|CELSR2|ETS2|GBX2|GJA1|GLI1|GLI2|HIF1A|HOXA3|HOXA4|HOXA5|HOXA6|HOXA7|HOXA9|HOXA10|HOXB5|HOXC4|HOXC6|HOXD9|MEIS1|MEOX1|MEOX2|NKX3-1|OTX1|PBX1|RARG|SMARCD3|SMO|SNAI1|STC1|TBX6|ZEB1|NR2F2|WNT5A|WNT7B|FZD5|NRP2|HAND2|TSHZ1|BASP1|SEMA3C|DKK1|TDRD7|HEY1|DLL1|DLL4|ODAD2|MESP1|SHROOM3|NDRG4|BHLHE41|ODAD3|OSR1|DAND5	-7.7	MyList
GO Biological Processes	19	GO:0032649	regulation of interferon-gamma production	19_GO:0032501 multicellular organismal process	-9.7	4.3	8.4	30211	117	1550	26	1.7	0.33	25|961|3553|3592|3594|3623|3624|3965|5142|7098|7124|7292|7474|7855|8767|9636|10148|11118|11119|26191|29126|51284|64115|80149|80380|282618	ABL1|CD47|IL1B|IL12A|IL12RB1|INHA|INHBA|LGALS9|PDE4B|TLR3|TNF|TNFSF4|WNT5A|FZD5|RIPK2|ISG15|EBI3|BTN3A2|BTN3A1|PTPN22|CD274|TLR7|VSIR|ZC3H12A|PDCD1LG2|IFNL1	-7.7	MyList
GO Biological Processes	19	GO:0043065	positive regulation of apoptotic process	19_GO:0048518 positive regulation of biological process	-9.7	2.4	7.3	30211	529	1550	64	4.1	0.51	25|133|135|220|467|637|652|668|1540|1647|2308|2683|2852|3202|3399|3433|3569|3592|3620|3624|3655|3663|3672|3965|4067|4217|4318|4824|5293|5371|5468|5743|5788|5916|6347|6348|6352|6648|7023|7043|7098|7124|7133|7421|7474|8091|8739|8743|8767|8795|10616|10628|23604|25816|27063|28984|29126|50486|51063|79845|80149|80758|81030|407006	ABL1|ADM|ADORA2A|ALDH1A3|ATF3|BID|BMP4|FOXL2|CYLD|GADD45A|FOXO1|B4GALT1|GPER1|HOXA5|ID3|IFIT2|IL6|IL12A|IDO1|INHBA|ITGA6|IRF5|ITGA1|LGALS9|LYN|MAP3K5|MMP9|NKX3-1|PIK3CD|PML|PPARG|PTGS2|PTPRC|RARG|CCL2|CCL3|CCL5|SOD2|TFAP4|TGFB3|TLR3|TNF|TNFRSF1B|VDR|WNT5A|HMGA2|HRK|TNFSF10|RIPK2|TNFRSF10B|RBCK1|TXNIP|DAPK2|TNFAIP8|ANKRD1|RGCC|CD274|G0S2|CALHM2|RNF122|ZC3H12A|PRR7|ZBP1|MIR221	-7.7	MyList
GO Biological Processes	19	GO:0051147	regulation of muscle cell differentiation	19_GO:0032502 developmental process	-9.7	3.8	8.1	30211	153	1550	30	1.9	0.35	627|652|859|1906|1948|2069|2852|3084|3398|3481|3815|4323|4654|5997|5999|6474|6648|6935|7494|9734|10014|22943|28514|55553|55897|79365|93649|168620|284358|407006	BDNF|BMP4|CAV3|EDN1|EFNB2|EREG|GPER1|NRG1|ID2|IGF2|KIT|MMP14|MYOD1|RGS2|RGS4|SHOX2|SOD2|ZEB1|XBP1|HDAC9|HDAC5|DKK1|DLL1|SOX6|MESP1|BHLHE41|MYOCD|BHLHA15|MAMSTR|MIR221	-7.7	MyList
GO Biological Processes	19	GO:0001818	negative regulation of cytokine production	19_GO:0048519 negative regulation of biological process	-9.6	2.7	7.5	30211	363	1550	50	3.2	0.45	490|634|684|947|1540|2633|3134|3569|3592|3620|3623|3624|3718|3902|3965|4790|4938|4940|5371|5552|5734|5788|5971|7043|7124|7128|7292|9111|9308|9314|9734|10333|10385|26191|27178|27242|28514|28951|28984|29126|51738|64115|79132|80149|80380|114548|114769|282618|407006|730249	ATP2B1|CEACAM1|BST2|CD34|CYLD|GBP1|HLA-F|IL6|IL12A|IDO1|INHA|INHBA|JAK3|LAG3|LGALS9|NFKB1|OAS1|OAS3|PML|SRGN|PTGER4|PTPRC|RELB|TGFB3|TNF|TNFAIP3|TNFSF4|NMI|CD83|KLF4|HDAC9|TLR6|BTN2A2|PTPN22|IL37|TNFRSF21|DLL1|TRIB2|RGCC|CD274|GHRL|VSIR|DHX58|ZC3H12A|PDCD1LG2|NLRP3|CARD16|IFNL1|MIR221|ACOD1	-7.7	MyList
GO Biological Processes	19	GO:0006874	cellular calcium ion homeostasis	19_GO:0065007 biological regulation	-9.6	2.5	7.4	30211	422	1550	55	3.5	0.47	25|133|134|146|490|623|624|719|783|784|825|859|1901|1903|1906|2149|2151|2247|2624|2769|2852|3351|3357|3627|3709|3718|4987|5021|5026|5156|5371|5732|5734|5739|5745|5788|6288|6348|6352|6354|6355|6373|6781|7225|7421|7474|7504|7779|8989|9709|51554|51738|79572|114897|284612	ABL1|ADM|ADORA1|ADRA1D|ATP2B1|BDKRB1|BDKRB2|C3AR1|CACNB2|CACNB3|CAPN3|CAV3|S1PR1|S1PR3|EDN1|F2R|F2RL2|FGF2|GATA2|GNA15|GPER1|HTR1B|HTR2B|CXCL10|ITPR2|JAK3|OPRL1|OXTR|P2RX5|PDGFRA|PML|PTGER2|PTGER4|PTGIR|PTH1R|PTPRC|SAA1|CCL3|CCL5|CCL7|CCL8|CXCL11|STC1|TRPC6|VDR|WNT5A|XK|SLC30A1|TRPA1|HERPUD1|ACKR4|GHRL|ATP13A3|C1QTNF1|SYPL2	-7.6	MyList
GO Biological Processes	19	GO:0030003	cellular cation homeostasis	19_GO:0065007 biological regulation	-9.6	2.2	7.2	30211	620	1550	71	4.6	0.53	25|133|134|146|490|623|624|719|783|784|825|859|1080|1901|1903|1906|2149|2151|2247|2495|2624|2769|2852|3091|3351|3357|3552|3627|3709|3718|4489|4493|4499|4501|4502|4891|4987|5021|5026|5156|5371|5732|5734|5739|5745|5788|6288|6348|6352|6354|6355|6373|6781|7225|7421|7474|7504|7779|8989|9709|23516|51554|51738|56833|64116|79572|83959|114897|144811|282679|284612	ABL1|ADM|ADORA1|ADRA1D|ATP2B1|BDKRB1|BDKRB2|C3AR1|CACNB2|CACNB3|CAPN3|CAV3|CFTR|S1PR1|S1PR3|EDN1|F2R|F2RL2|FGF2|FTH1|GATA2|GNA15|GPER1|HIF1A|HTR1B|HTR2B|IL1A|CXCL10|ITPR2|JAK3|MT1A|MT1E|MT1M|MT1X|MT2A|SLC11A2|OPRL1|OXTR|P2RX5|PDGFRA|PML|PTGER2|PTGER4|PTGIR|PTH1R|PTPRC|SAA1|CCL3|CCL5|CCL7|CCL8|CXCL11|STC1|TRPC6|VDR|WNT5A|XK|SLC30A1|TRPA1|HERPUD1|SLC39A14|ACKR4|GHRL|SLAMF8|SLC39A8|ATP13A3|SLC4A11|C…	-7.6	MyList
GO Biological Processes	19	GO:0032651	regulation of interleukin-1 beta production	19_GO:0032501 multicellular organismal process	-9.6	4.4	8.4	30211	110	1550	25	1.6	0.32	834|1903|2149|3428|3569|3965|4023|4615|5371|6348|7124|7128|7474|7855|8767|9447|10333|24145|27086|51738|80149|113277|114548|114769|115362	CASP1|S1PR3|F2R|IFI16|IL6|LGALS9|LPL|MYD88|PML|CCL3|TNF|TNFAIP3|WNT5A|FZD5|RIPK2|AIM2|TLR6|PANX1|FOXP1|GHRL|ZC3H12A|TMEM106A|NLRP3|CARD16|GBP5	-7.6	MyList
KEGG Pathway	24	hsa05134	Legionellosis		-9.6	6.2	9.1	30211	57	1550	18	1.2	0.27	718|834|840|1379|2919|2920|2921|3306|3553|3569|3576|3592|4615|4790|4791|4792|7124|9554	C3|CASP1|CASP7|CR1L|CXCL1|CXCL2|CXCL3|HSPA2|IL1B|IL6|CXCL8|IL12A|MYD88|NFKB1|NFKB2|NFKBIA|TNF|SEC22B	-7.6	MyList
WikiPathways	27	WP4197	Immune response to tuberculosis		-9.6	10	10	30211	23	1550	12	0.77	0.22	3430|3434|3437|3455|3460|3659|4599|4938|5696|6772|6773|6890	IFI35|IFIT1|IFIT3|IFNAR2|IFNGR2|IRF1|MX1|OAS1|PSMB8|STAT1|STAT2|TAP1	-7.6	MyList
GO Biological Processes	19	GO:0055074	calcium ion homeostasis	19_GO:0065007 biological regulation	-9.6	2.5	7.4	30211	435	1550	56	3.6	0.47	25|133|134|146|490|623|624|719|783|784|825|859|1594|1901|1903|1906|2149|2151|2247|2624|2769|2852|3351|3357|3627|3709|3718|4987|5021|5026|5156|5371|5732|5734|5739|5745|5788|6288|6348|6352|6354|6355|6373|6781|7225|7421|7474|7504|7779|8989|9709|51554|51738|79572|114897|284612	ABL1|ADM|ADORA1|ADRA1D|ATP2B1|BDKRB1|BDKRB2|C3AR1|CACNB2|CACNB3|CAPN3|CAV3|CYP27B1|S1PR1|S1PR3|EDN1|F2R|F2RL2|FGF2|GATA2|GNA15|GPER1|HTR1B|HTR2B|CXCL10|ITPR2|JAK3|OPRL1|OXTR|P2RX5|PDGFRA|PML|PTGER2|PTGER4|PTGIR|PTH1R|PTPRC|SAA1|CCL3|CCL5|CCL7|CCL8|CXCL11|STC1|TRPC6|VDR|WNT5A|XK|SLC30A1|TRPA1|HERPUD1|ACKR4|GHRL|ATP13A3|C1QTNF1|SYPL2	-7.6	MyList
GO Biological Processes	19	GO:0045766	positive regulation of angiogenesis	19_GO:0032502 developmental process	-9.6	3.5	7.9	30211	183	1550	33	2.1	0.37	25|133|718|719|861|947|1116|2113|2247|2321|2624|3091|3099|3552|3553|3576|3696|4814|5054|5293|6019|7098|7422|7424|7474|7494|8091|9314|28514|51738|51752|80149|168667	ABL1|ADM|C3|C3AR1|RUNX1|CD34|CHI3L1|ETS1|FGF2|FLT1|GATA2|HIF1A|HK2|IL1A|IL1B|CXCL8|ITGB8|NINJ1|SERPINE1|PIK3CD|RLN2|TLR3|VEGFA|VEGFC|WNT5A|XBP1|HMGA2|KLF4|DLL1|GHRL|ERAP1|ZC3H12A|BMPER	-7.6	MyList
GO Biological Processes	19	GO:1904018	positive regulation of vasculature development	19_GO:0032502 developmental process	-9.6	3.5	7.9	30211	183	1550	33	2.1	0.37	25|133|718|719|861|947|1116|2113|2247|2321|2624|3091|3099|3552|3553|3576|3696|4814|5054|5293|6019|7098|7422|7424|7474|7494|8091|9314|28514|51738|51752|80149|168667	ABL1|ADM|C3|C3AR1|RUNX1|CD34|CHI3L1|ETS1|FGF2|FLT1|GATA2|HIF1A|HK2|IL1A|IL1B|CXCL8|ITGB8|NINJ1|SERPINE1|PIK3CD|RLN2|TLR3|VEGFA|VEGFC|WNT5A|XBP1|HMGA2|KLF4|DLL1|GHRL|ERAP1|ZC3H12A|BMPER	-7.6	MyList
WikiPathways	27	WP4880	Host-pathogen interaction of human coronaviruses - interferon induction		-9.6	8.3	9.7	30211	33	1550	14	0.9	0.24	3455|4615|4790|4792|4938|4939|4940|5610|6772|6773|9641|23586|51284|64135	IFNAR2|MYD88|NFKB1|NFKBIA|OAS1|OAS2|OAS3|EIF2AK2|STAT1|STAT2|IKBKE|DDX58|TLR7|IFIH1	-7.6	MyList
GO Biological Processes	19	GO:0010950	positive regulation of endopeptidase activity	19_GO:0048518 positive regulation of biological process	-9.5	3.6	8	30211	174	1550	32	2.1	0.36	637|668|834|843|1942|2149|2852|3428|3965|4067|4155|4217|4824|5371|5468|5641|5721|6091|7023|7124|8743|8767|8837|9447|10017|27141|55075|64115|80758|83595|84630|114548	BID|FOXL2|CASP1|CASP10|EFNA1|F2R|GPER1|IFI16|LGALS9|LYN|MBP|MAP3K5|NKX3-1|PML|PPARG|LGMN|PSME2|ROBO1|TFAP4|TNF|TNFSF10|RIPK2|CFLAR|AIM2|BCL2L10|CIDEB|UACA|VSIR|PRR7|SOX7|TTBK1|NLRP3	-7.6	MyList
GO Biological Processes	19	GO:0050878	regulation of body fluid levels	19_GO:0065007 biological regulation	-9.5	2.7	7.4	30211	366	1550	50	3.2	0.45	18|133|134|135|231|360|634|947|1080|1607|1906|1952|2149|2151|2161|2697|3037|3053|3091|3099|3177|3569|3818|4939|4987|5021|5054|5055|5156|5270|5328|5329|5359|5800|6288|6583|6776|7357|7421|7422|7494|7980|8835|8862|9162|10019|84830|114897|375033|653145	ABAT|ADM|ADORA1|ADORA2A|AKR1B1|AQP3|CEACAM1|CD34|CFTR|DGKB|EDN1|CELSR2|F2R|F2RL2|F12|GJA1|HAS2|SERPIND1|HIF1A|HK2|SLC29A2|IL6|KLKB1|OAS2|OPRL1|OXTR|SERPINE1|SERPINB2|PDGFRA|SERPINE2|PLAU|PLAUR|PLSCR1|PTPRO|SAA1|SLC22A4|STAT5A|UGCG|VDR|VEGFA|XBP1|TFPI2|SOCS2|APLN|DGKI|SH2B3|ADTRP|C1QTNF1|PEAR1|ANXA8	-7.6	MyList
GO Biological Processes	19	GO:0001890	placenta development	19_GO:0022414 reproductive process	-9.5	3.9	8.1	30211	146	1550	29	1.9	0.34	133|329|639|1028|1051|1437|1594|2624|3091|3481|3696|3726|3880|3976|5468|5743|6615|6665|6781|7026|7421|7477|7855|7942|9021|23462|51738|84870|113026	ADM|BIRC2|PRDM1|CDKN1C|CEBPB|CSF2|CYP27B1|GATA2|HIF1A|IGF2|ITGB8|JUNB|KRT19|LIF|PPARG|PTGS2|SNAI1|SOX15|STC1|NR2F2|VDR|WNT7B|FZD5|TFEB|SOCS3|HEY1|GHRL|RSPO3|PLCD3	-7.6	MyList
GO Biological Processes	19	GO:0030593	neutrophil chemotaxis	19_GO:0040011 locomotion	-9.5	5.2	8.7	30211	79	1550	21	1.4	0.29	2207|2919|2920|2921|3553|3576|3627|3672|5142|5293|6288|6347|6348|6351|6352|6354|6355|6364|6372|6373|6374	FCER1G|CXCL1|CXCL2|CXCL3|IL1B|CXCL8|CXCL10|ITGA1|PDE4B|PIK3CD|SAA1|CCL2|CCL3|CCL4|CCL5|CCL7|CCL8|CCL20|CXCL6|CXCL11|CXCL5	-7.6	MyList
GO Biological Processes	19	GO:0002521	leukocyte differentiation	19_GO:0002376 immune system process	-9.5	2.7	7.5	30211	355	1550	49	3.2	0.44	25|652|861|972|1435|1437|1440|2207|2624|3428|3569|3574|3575|3589|3659|3696|3714|3718|3726|3815|4067|4189|4286|4318|5087|5293|5468|5734|5788|5971|7124|7412|7422|7855|9580|9734|9760|10014|10673|26191|27086|28514|54567|55509|56833|64218|80758|91543|116071	ABL1|BMP4|RUNX1|CD74|CSF1|CSF2|CSF3|FCER1G|GATA2|IFI16|IL6|IL7|IL7R|IL11|IRF1|ITGB8|JAG2|JAK3|JUNB|KIT|LYN|DNAJB9|MITF|MMP9|PBX1|PIK3CD|PPARG|PTGER4|PTPRC|RELB|TNF|VCAM1|VEGFA|FZD5|SOX13|HDAC9|TOX|HDAC5|TNFSF13B|PTPN22|FOXP1|DLL1|DLL4|BATF3|SLAMF8|SEMA4A|PRR7|RSAD2|BATF2	-7.5	MyList
GO Biological Processes	19	GO:0032481	positive regulation of type I interferon production	19_GO:0048518 positive regulation of biological process	-9.5	6	9	30211	58	1550	18	1.2	0.27	661|3659|3663|3665|4321|4615|4938|4939|4940|6772|7098|8767|9636|23586|26191|51284|64135|79132	POLR3D|IRF1|IRF5|IRF7|MMP12|MYD88|OAS1|OAS2|OAS3|STAT1|TLR3|RIPK2|ISG15|DDX58|PTPN22|TLR7|IFIH1|DHX58	-7.5	MyList
GO Biological Processes	19	GO:1905330	regulation of morphogenesis of an epithelium	19_GO:0032502 developmental process	-9.4	5.7	8.8	30211	65	1550	19	1.2	0.28	25|367|652|859|2247|2252|2668|2697|3627|3976|5293|6591|6608|6662|7124|7422|7474|27086|81792	ABL1|AR|BMP4|CAV3|FGF2|FGF7|GDNF|GJA1|CXCL10|LIF|PIK3CD|SNAI2|SMO|SOX9|TNF|VEGFA|WNT5A|FOXP1|ADAMTS12	-7.5	MyList
GO Biological Processes	19	GO:0007169	transmembrane receptor protein tyrosine kinase signaling pathway	19_GO:0023052 signaling	-9.4	2.6	7.3	30211	403	1550	53	3.4	0.46	25|374|624|627|685|1435|1839|1942|1948|2044|2049|2050|2065|2069|2247|2252|2308|2321|2591|2886|3084|3481|3718|3815|4015|4067|4318|4739|4803|5156|5157|5293|6662|6776|7422|7424|8013|8828|8835|10019|10188|10458|10603|10628|10636|23236|23516|27006|54541|55359|64651|140700|407006	ABL1|AREG|BDKRB2|BDNF|BTC|CSF1|HBEGF|EFNA1|EFNB2|EPHA5|EPHB3|EPHB4|ERBB3|EREG|FGF2|FGF7|FOXO1|FLT1|GALNT3|GRB7|NRG1|IGF2|JAK3|KIT|LOX|LYN|MMP9|NEDD9|NGF|PDGFRA|PDGFRL|PIK3CD|SOX9|STAT5A|VEGFA|VEGFC|NR4A3|NRP2|SOCS2|SH2B3|TNK2|BAIAP2|SH2B2|TXNIP|RGS14|PLCB1|SLC39A14|FGF22|DDIT4|STYK1|CSRNP1|SAMD10|MIR221	-7.5	MyList
GO Biological Processes	19	GO:0051051	negative regulation of transport	19_GO:0051179 localization	-9.4	2.4	7.3	30211	463	1550	58	3.7	0.48	18|88|134|341|634|859|961|972|1410|1906|2065|2149|2697|3084|3134|3351|3553|3589|3592|3598|3623|3624|3965|3976|4318|4790|4987|5021|5270|5359|5743|5997|5999|6236|6672|6781|7124|7133|7779|9882|10105|10347|11151|23072|51738|55022|57520|79651|80223|84830|90007|91461|91543|112476|112755|124930|130497|338440	ABAT|ACTN2|ADORA1|APOC1|CEACAM1|CAV3|CD47|CD74|CRYAB|EDN1|ERBB3|F2R|GJA1|NRG1|HLA-F|HTR1B|IL1B|IL11|IL12A|IL13RA2|INHA|INHBA|LGALS9|LIF|MMP9|NFKB1|OPRL1|OXTR|SERPINE2|PLSCR1|PTGS2|RGS2|RGS4|RRAD|SP100|STC1|TNF|TNFRSF1B|SLC30A1|TBC1D4|PPIF|ABCA7|CORO1A|HECW1|GHRL|PID1|HECW2|RHBDF2|RAB11FIP1|ADTRP|MIDN|PKDCC|RSAD2|PRRT2|STX1B|ANKRD13B|OSR1|ANO9	-7.5	MyList
GO Biological Processes	19	GO:0007167	enzyme linked receptor protein signaling pathway	19_GO:0023052 signaling	-9.4	2.2	7.1	30211	601	1550	69	4.5	0.52	25|374|624|627|652|685|1435|1839|1942|1948|2044|2049|2050|2065|2069|2247|2252|2308|2321|2591|2886|3084|3397|3481|3623|3624|3696|3718|3815|3976|4015|4067|4093|4318|4739|4803|5156|5157|5293|5371|5468|6662|6776|7043|7422|7424|8013|8200|8828|8835|9180|9404|9863|10019|10188|10458|10603|10628|10636|23236|23516|27006|54541|55359|64651|64750|140700|285704|407006	ABL1|AREG|BDKRB2|BDNF|BMP4|BTC|CSF1|HBEGF|EFNA1|EFNB2|EPHA5|EPHB3|EPHB4|ERBB3|EREG|FGF2|FGF7|FOXO1|FLT1|GALNT3|GRB7|NRG1|ID1|IGF2|INHA|INHBA|ITGB8|JAK3|KIT|LIF|LOX|LYN|SMAD9|MMP9|NEDD9|NGF|PDGFRA|PDGFRL|PIK3CD|PML|PPARG|SOX9|STAT5A|TGFB3|VEGFA|VEGFC|NR4A3|GDF5|NRP2|SOCS2|OSMR|LPXN|MAGI2|SH2B3|TNK2|BAIAP2|SH2B2|TXNIP|RGS14|PLCB1|SLC39A14|FGF22|DDIT4|STYK1|CSRNP1|SMURF2|SAMD10|RGMB|MIR221	-7.5	MyList
KEGG Pathway	24	hsa04620	Toll-like receptor signaling pathway		-9.4	4.5	8.3	30211	104	1550	24	1.5	0.31	1326|3455|3553|3569|3576|3592|3627|3663|3665|4615|4790|4792|5293|5606|6348|6351|6352|6373|6772|7098|7124|9641|10333|51284	MAP3K8|IFNAR2|IL1B|IL6|CXCL8|IL12A|CXCL10|IRF5|IRF7|MYD88|NFKB1|NFKBIA|PIK3CD|MAP2K3|CCL3|CCL4|CCL5|CXCL11|STAT1|TLR3|TNF|IKBKE|TLR6|TLR7	-7.4	MyList
GO Biological Processes	19	GO:0032642	regulation of chemokine production	19_GO:0032501 multicellular organismal process	-9.3	4.6	8.3	30211	97	1550	23	1.5	0.31	972|3091|3553|3569|3574|3965|4023|4155|4615|4938|4940|5610|6372|6591|7098|7124|7292|7474|8767|9314|27086|51284|90865	CD74|HIF1A|IL1B|IL6|IL7|LGALS9|LPL|MBP|MYD88|OAS1|OAS3|EIF2AK2|CXCL6|SNAI2|TLR3|TNF|TNFSF4|WNT5A|RIPK2|KLF4|FOXP1|TLR7|IL33	-7.3	MyList
GO Biological Processes	19	GO:0051046	regulation of secretion	19_GO:0051179 localization	-9.3	2.2	7.1	30211	606	1550	69	4.5	0.52	18|134|135|634|668|783|972|1080|1588|1906|2044|2065|2149|2624|2668|2697|2852|3084|3091|3134|3351|3552|3553|3569|3589|3592|3598|3623|3624|3965|3976|4067|4824|4939|4987|5021|5208|5468|5874|6288|6352|6447|6623|6781|7043|7124|7133|7424|7494|7779|8111|8564|8912|9536|10699|10802|22999|25837|27063|28984|50855|51738|79651|80223|84830|90007|91543|112755|114897	ABAT|ADORA1|ADORA2A|CEACAM1|FOXL2|CACNB2|CD74|CFTR|CYP19A1|EDN1|EPHA5|ERBB3|F2R|GATA2|GDNF|GJA1|GPER1|NRG1|HIF1A|HLA-F|HTR1B|IL1A|IL1B|IL6|IL11|IL12A|IL13RA2|INHA|INHBA|LGALS9|LIF|LYN|NKX3-1|OAS2|OPRL1|OXTR|PFKFB2|PPARG|RAB27B|SAA1|CCL5|SCG5|SNCG|STC1|TGFB3|TNF|TNFRSF1B|VEGFC|XBP1|SLC30A1|GPR68|KMO|CACNA1H|PTGES|CORIN|SEC24A|RIMS1|RAB26|ANKRD1|RGCC|PARD6A|GHRL|RHBDF2|RAB11FIP1|ADTRP|MIDN|RSAD2|ST…	-7.3	MyList
GO Biological Processes	19	GO:1901699	cellular response to nitrogen compound	19_GO:0050896 response to stimulus	-9.3	2.2	7	30211	632	1550	71	4.6	0.53	15|25|88|196|445|634|837|840|859|999|1051|1080|1129|1583|1906|2308|2697|2769|2852|3177|3309|3351|3357|3383|3397|3434|3481|3709|3718|4067|4217|4314|4790|5142|5156|5468|5641|5743|6506|6662|6772|6776|6781|6935|7098|7124|7412|7494|8013|8767|8835|8837|9734|9882|10014|10333|10458|10603|11277|23236|23516|23586|26191|28999|51274|54464|57463|64135|84709|114814|116372	AANAT|ABL1|ACTN2|AHR|ASS1|CEACAM1|CASP4|CASP7|CAV3|CDH1|CEBPB|CFTR|CHRM2|CYP11A1|EDN1|FOXO1|GJA1|GNA15|GPER1|SLC29A2|HSPA5|HTR1B|HTR2B|ICAM1|ID1|IFIT1|IGF2|ITPR2|JAK3|LYN|MAP3K5|MMP3|NFKB1|PDE4B|PDGFRA|PPARG|LGMN|PTGS2|SLC1A2|SOX9|STAT1|STAT5A|STC1|ZEB1|TLR3|TNF|VCAM1|XBP1|NR4A3|RIPK2|SOCS2|CFLAR|HDAC9|TBC1D4|HDAC5|TLR6|BAIAP2|SH2B2|TREX1|PLCB1|SLC39A14|DDX58|PTPN22|KLF15|KLF3|XRN1|AMIGO1|IFIH1|M…	-7.3	MyList
GO Biological Processes	19	GO:0043068	positive regulation of programmed cell death	19_GO:0048518 positive regulation of biological process	-9.2	2.3	7.1	30211	543	1550	64	4.1	0.51	25|133|135|220|467|637|652|668|1540|1647|2308|2683|2852|3202|3399|3433|3569|3592|3620|3624|3655|3663|3672|3965|4067|4217|4318|4824|5293|5371|5468|5743|5788|5916|6347|6348|6352|6648|7023|7043|7098|7124|7133|7421|7474|8091|8739|8743|8767|8795|10616|10628|23604|25816|27063|28984|29126|50486|51063|79845|80149|80758|81030|407006	ABL1|ADM|ADORA2A|ALDH1A3|ATF3|BID|BMP4|FOXL2|CYLD|GADD45A|FOXO1|B4GALT1|GPER1|HOXA5|ID3|IFIT2|IL6|IL12A|IDO1|INHBA|ITGA6|IRF5|ITGA1|LGALS9|LYN|MAP3K5|MMP9|NKX3-1|PIK3CD|PML|PPARG|PTGS2|PTPRC|RARG|CCL2|CCL3|CCL5|SOD2|TFAP4|TGFB3|TLR3|TNF|TNFRSF1B|VDR|WNT5A|HMGA2|HRK|TNFSF10|RIPK2|TNFRSF10B|RBCK1|TXNIP|DAPK2|TNFAIP8|ANKRD1|RGCC|CD274|G0S2|CALHM2|RNF122|ZC3H12A|PRR7|ZBP1|MIR221	-7.3	MyList
GO Biological Processes	19	GO:0060537	muscle tissue development	19_GO:0032502 developmental process	-9.2	2.8	7.4	30211	306	1550	44	2.8	0.42	88|467|607|652|668|859|1827|1901|2006|2697|3084|3142|3235|3398|3679|4223|4654|5156|5239|6474|6608|6662|7026|7422|7474|7504|8837|9242|10324|10472|10512|23135|23462|23764|27063|28514|50507|54567|55897|59269|65009|80206|93649|130497	ACTN2|ATF3|BCL9|BMP4|FOXL2|CAV3|RCAN1|S1PR1|ELN|GJA1|NRG1|HLX|HOXD9|ID2|ITGA7|MEOX2|MYOD1|PDGFRA|PGM5|SHOX2|SMO|SOX9|NR2F2|VEGFA|WNT5A|XK|CFLAR|MSC|KLHL41|ZBTB18|SEMA3C|KDM6B|HEY1|MAFF|ANKRD1|DLL1|NOX4|DLL4|MESP1|HIVEP3|NDRG4|FHOD3|MYOCD|OSR1	-7.2	MyList
GO Biological Processes	19	GO:0006873	cellular ion homeostasis	19_GO:0065007 biological regulation	-9.2	2.2	7	30211	635	1550	71	4.6	0.53	25|133|134|146|490|623|624|719|783|784|825|859|1080|1901|1903|1906|2149|2151|2247|2495|2624|2769|2852|3091|3351|3357|3552|3627|3709|3718|4489|4493|4499|4501|4502|4891|4987|5021|5026|5156|5371|5732|5734|5739|5745|5788|6288|6348|6352|6354|6355|6373|6781|7225|7421|7474|7504|7779|8989|9709|23516|51554|51738|56833|64116|79572|83959|114897|144811|282679|284612	ABL1|ADM|ADORA1|ADRA1D|ATP2B1|BDKRB1|BDKRB2|C3AR1|CACNB2|CACNB3|CAPN3|CAV3|CFTR|S1PR1|S1PR3|EDN1|F2R|F2RL2|FGF2|FTH1|GATA2|GNA15|GPER1|HIF1A|HTR1B|HTR2B|IL1A|CXCL10|ITPR2|JAK3|MT1A|MT1E|MT1M|MT1X|MT2A|SLC11A2|OPRL1|OXTR|P2RX5|PDGFRA|PML|PTGER2|PTGER4|PTGIR|PTH1R|PTPRC|SAA1|CCL3|CCL5|CCL7|CCL8|CXCL11|STC1|TRPC6|VDR|WNT5A|XK|SLC30A1|TRPA1|HERPUD1|SLC39A14|ACKR4|GHRL|SLAMF8|SLC39A8|ATP13A3|SLC4A11|C…	-7.2	MyList
GO Biological Processes	19	GO:0051250	negative regulation of lymphocyte activation	19_GO:0002376 immune system process	-9.1	3.6	7.8	30211	161	1550	30	1.9	0.35	135|634|652|861|868|972|1051|3134|3142|3398|3620|3623|3624|3659|3718|3902|3965|4067|7128|7292|7940|10385|26191|27242|29126|64115|80149|80380|259307|282618	ADORA2A|CEACAM1|BMP4|RUNX1|CBLB|CD74|CEBPB|HLA-F|HLX|ID2|IDO1|INHA|INHBA|IRF1|JAK3|LAG3|LGALS9|LYN|TNFAIP3|TNFSF4|LST1|BTN2A2|PTPN22|TNFRSF21|CD274|VSIR|ZC3H12A|PDCD1LG2|IL4I1|IFNL1	-7.2	MyList
GO Biological Processes	19	GO:0045621	positive regulation of lymphocyte differentiation	19_GO:0002376 immune system process	-9.1	4.4	8.1	30211	107	1550	24	1.5	0.31	861|972|2736|3142|3574|3575|3594|3601|3965|4323|5788|6666|7292|7494|8767|8876|9308|9580|9760|10385|64115|64332|114548|259307	RUNX1|CD74|GLI2|HLX|IL7|IL7R|IL12RB1|IL15RA|LGALS9|MMP14|PTPRC|SOX12|TNFSF4|XBP1|RIPK2|VNN1|CD83|SOX13|TOX|BTN2A2|VSIR|NFKBIZ|NLRP3|IL4I1	-7.2	MyList
GO Biological Processes	19	GO:0000904	cell morphogenesis involved in differentiation	19_GO:0032502 developmental process	-9.1	2.3	7	30211	522	1550	62	4	0.5	25|367|627|885|1906|1942|1948|1952|1955|2044|2049|2050|2115|2637|2668|2736|3695|3798|3909|3911|3914|3918|4130|4891|4917|5357|5364|5800|6091|6608|6781|7422|7474|7869|8577|8828|9404|9890|10458|10512|22865|22891|22903|22943|23129|23218|23671|26050|26084|54538|56956|57463|57715|57731|64218|65078|80128|84879|114798|122786|139065|223117	ABL1|AR|BDNF|CCK|EDN1|EFNA1|EFNB2|CELSR2|MEGF9|EPHA5|EPHB3|EPHB4|ETV1|GBX2|GDNF|GLI2|ITGB7|KIF5A|LAMA3|LAMA5|LAMB3|LAMC2|MAP1A|SLC11A2|NTN3|PLS1|PLXNB1|PTPRO|ROBO1|SMO|STC1|VEGFA|WNT5A|SEMA3B|TMEFF1|NRP2|LPXN|PLPPR4|BAIAP2|SEMA3C|SLITRK3|ZNF365|BTBD3|DKK1|PLXND1|NBEAL2|TMEFF2|SLITRK5|ARHGEF26|ROBO4|LHX9|AMIGO1|SEMA4G|SPTBN4|SEMA4A|RTN4R|TRIM46|MFSD2A|SLITRK1|FRMD6|SLITRK4|SEMA3D	-7.2	MyList
GO Biological Processes	19	GO:0032989	cellular component morphogenesis	19_GO:0032502 developmental process	-9.1	2.2	7	30211	573	1550	66	4.3	0.51	25|88|135|627|825|885|1906|1942|1948|1952|2044|2049|2050|2115|2637|2668|2736|2823|3672|3798|3880|3909|3911|3918|4130|4803|4891|4917|5156|5239|5364|5800|6091|6608|7422|7474|7477|7869|8577|8828|8837|9890|10324|10458|10512|22865|22891|22903|23129|25802|26050|27063|54538|55022|56956|57463|57715|57731|64218|65078|80128|80206|87178|114798|139065|223117	ABL1|ACTN2|ADORA2A|BDNF|CAPN3|CCK|EDN1|EFNA1|EFNB2|CELSR2|EPHA5|EPHB3|EPHB4|ETV1|GBX2|GDNF|GLI2|GPM6A|ITGA1|KIF5A|KRT19|LAMA3|LAMA5|LAMC2|MAP1A|NGF|SLC11A2|NTN3|PDGFRA|PGM5|PLXNB1|PTPRO|ROBO1|SMO|VEGFA|WNT5A|WNT7B|SEMA3B|TMEFF1|NRP2|CFLAR|PLPPR4|KLHL41|BAIAP2|SEMA3C|SLITRK3|ZNF365|BTBD3|PLXND1|LMOD1|SLITRK5|ANKRD1|ROBO4|PID1|LHX9|AMIGO1|SEMA4G|SPTBN4|SEMA4A|RTN4R|TRIM46|FHOD3|PNPT1|SLITRK1|SLITRK…	-7.2	MyList
GO Biological Processes	19	GO:2001236	regulation of extrinsic apoptotic signaling pathway	19_GO:0023052 signaling	-9	3.7	7.8	30211	153	1550	29	1.9	0.34	367|467|637|652|1437|1540|2537|2668|2852|3383|3552|3553|3574|3624|3655|5054|5371|5788|6591|6672|7124|7128|7185|8743|8837|10616|50486|85450|407006	AR|ATF3|BID|BMP4|CSF2|CYLD|IFI6|GDNF|GPER1|ICAM1|IL1A|IL1B|IL7|INHBA|ITGA6|SERPINE1|PML|PTPRC|SNAI2|SP100|TNF|TNFAIP3|TRAF1|TNFSF10|CFLAR|RBCK1|G0S2|ITPRIP|MIR221	-7.1	MyList
GO Biological Processes	19	GO:0051092	positive regulation of NF-kappaB transcription factor activity	19_GO:0008152 metabolic process	-9	3.7	7.8	30211	153	1550	29	1.9	0.34	367|825|3553|3656|3965|4615|5610|6737|7098|7124|7185|7474|7706|8767|8837|8995|9447|9830|10333|10346|10475|10616|60401|85363|114548|114769|117854|219790|338382	AR|CAPN3|IL1B|IRAK2|LGALS9|MYD88|EIF2AK2|TRIM21|TLR3|TNF|TRAF1|WNT5A|TRIM25|RIPK2|CFLAR|TNFSF18|AIM2|TRIM14|TLR6|TRIM22|TRIM38|RBCK1|EDA2R|TRIM5|NLRP3|CARD16|TRIM6|RTKN2|RAB7B	-7.1	MyList
GO Biological Processes	19	GO:0014706	striated muscle tissue development	19_GO:0032502 developmental process	-9	2.9	7.3	30211	287	1550	42	2.7	0.41	88|467|607|652|668|859|1827|1901|2006|2697|3084|3142|3235|3398|3679|4223|4654|5156|5239|6474|6608|7026|7422|7474|7504|8837|9242|10324|10472|10512|23135|23462|23764|27063|28514|50507|54567|55897|59269|65009|80206|93649	ACTN2|ATF3|BCL9|BMP4|FOXL2|CAV3|RCAN1|S1PR1|ELN|GJA1|NRG1|HLX|HOXD9|ID2|ITGA7|MEOX2|MYOD1|PDGFRA|PGM5|SHOX2|SMO|NR2F2|VEGFA|WNT5A|XK|CFLAR|MSC|KLHL41|ZBTB18|SEMA3C|KDM6B|HEY1|MAFF|ANKRD1|DLL1|NOX4|DLL4|MESP1|HIVEP3|NDRG4|FHOD3|MYOCD	-7.1	MyList
GO Biological Processes	19	GO:0055082	cellular chemical homeostasis	19_GO:0065007 biological regulation	-9	2.1	6.8	30211	746	1550	79	5.1	0.56	25|133|134|146|490|623|624|719|783|784|825|859|1080|1901|1903|1906|2081|2149|2151|2247|2308|2495|2624|2769|2852|3091|3099|3351|3357|3383|3552|3627|3709|3718|4489|4493|4499|4501|4502|4891|4987|5021|5026|5156|5371|5563|5732|5734|5739|5745|5788|6288|6348|6352|6354|6355|6373|6781|7225|7421|7474|7494|7504|7779|8989|9709|23516|28999|50507|51554|51738|56833|64116|79572|83959|114897|144811|282679|284612	ABL1|ADM|ADORA1|ADRA1D|ATP2B1|BDKRB1|BDKRB2|C3AR1|CACNB2|CACNB3|CAPN3|CAV3|CFTR|S1PR1|S1PR3|EDN1|ERN1|F2R|F2RL2|FGF2|FOXO1|FTH1|GATA2|GNA15|GPER1|HIF1A|HK2|HTR1B|HTR2B|ICAM1|IL1A|CXCL10|ITPR2|JAK3|MT1A|MT1E|MT1M|MT1X|MT2A|SLC11A2|OPRL1|OXTR|P2RX5|PDGFRA|PML|PRKAA2|PTGER2|PTGER4|PTGIR|PTH1R|PTPRC|SAA1|CCL3|CCL5|CCL7|CCL8|CXCL11|STC1|TRPC6|VDR|WNT5A|XBP1|XK|SLC30A1|TRPA1|HERPUD1|SLC39A14|KLF15|NOX4…	-7.1	MyList
KEGG Pathway	24	hsa04933	AGE-RAGE signaling pathway in diabetic complications		-9	4.5	8.1	30211	100	1550	23	1.5	0.31	1906|2308|3383|3552|3553|3569|3576|4790|5054|5293|5330|6347|6772|6776|7043|7124|7412|7422|7424|23236|50507|84812|113026	EDN1|FOXO1|ICAM1|IL1A|IL1B|IL6|CXCL8|NFKB1|SERPINE1|PIK3CD|PLCB2|CCL2|STAT1|STAT5A|TGFB3|TNF|VCAM1|VEGFA|VEGFC|PLCB1|NOX4|PLCD4|PLCD3	-7.1	MyList
GO Biological Processes	19	GO:0071621	granulocyte chemotaxis	19_GO:0040011 locomotion	-9	4.9	8.3	30211	84	1550	21	1.4	0.29	2207|2919|2920|2921|3553|3576|3627|3672|5142|5293|6288|6347|6348|6351|6352|6354|6355|6364|6372|6373|6374	FCER1G|CXCL1|CXCL2|CXCL3|IL1B|CXCL8|CXCL10|ITGA1|PDE4B|PIK3CD|SAA1|CCL2|CCL3|CCL4|CCL5|CCL7|CCL8|CCL20|CXCL6|CXCL11|CXCL5	-7.1	MyList
GO Biological Processes	19	GO:0070372	regulation of ERK1 and ERK2 cascade	19_GO:0023052 signaling	-8.9	2.8	7.2	30211	311	1550	44	2.8	0.42	25|467|634|652|960|972|1116|1846|2149|2247|2633|2852|3084|3357|3383|3552|3553|3965|3976|4067|5156|5788|6347|6348|6351|6352|6354|6355|6364|7124|8000|8767|8837|9464|10318|10347|10385|10636|26191|50507|65009|154043|168667|407006	ABL1|ATF3|CEACAM1|BMP4|CD44|CD74|CHI3L1|DUSP4|F2R|FGF2|GBP1|GPER1|NRG1|HTR2B|ICAM1|IL1A|IL1B|LGALS9|LIF|LYN|PDGFRA|PTPRC|CCL2|CCL3|CCL4|CCL5|CCL7|CCL8|CCL20|TNF|PSCA|RIPK2|CFLAR|HAND2|TNIP1|ABCA7|BTN2A2|RGS14|PTPN22|NOX4|NDRG4|CNKSR3|BMPER|MIR221	-7	MyList
GO Biological Processes	19	GO:0048863	stem cell differentiation	19_GO:0032502 developmental process	-8.9	3.6	7.7	30211	164	1550	30	1.9	0.35	1000|1906|2247|2637|2668|2823|3084|3091|3204|3357|3815|3911|3976|4222|5788|6591|6608|6662|7869|8091|8828|9464|10512|57715|64218|80237|93649|130497|157506|223117	CDH2|EDN1|FGF2|GBX2|GDNF|GPM6A|NRG1|HIF1A|HOXA7|HTR2B|KIT|LAMA5|LIF|MEOX1|PTPRC|SNAI2|SMO|SOX9|SEMA3B|HMGA2|NRP2|HAND2|SEMA3C|SEMA4G|SEMA4A|ELL3|MYOCD|OSR1|RDH10|SEMA3D	-7	MyList
GO Biological Processes	19	GO:0002274	myeloid leukocyte activation	19_GO:0002376 immune system process	-8.9	3.9	7.8	30211	136	1550	27	1.7	0.33	1435|1437|2207|3430|3460|3576|3696|3815|4067|4615|5293|5971|6348|6352|6372|7098|7124|7462|8013|9111|10333|10397|11277|27086|55509|113277|116071	CSF1|CSF2|FCER1G|IFI35|IFNGR2|CXCL8|ITGB8|KIT|LYN|MYD88|PIK3CD|RELB|CCL3|CCL5|CXCL6|TLR3|TNF|LAT2|NR4A3|NMI|TLR6|NDRG1|TREX1|FOXP1|BATF3|TMEM106A|BATF2	-7	MyList
GO Biological Processes	19	GO:0009611	response to wounding	19_GO:0050896 response to stimulus	-8.9	2.4	7	30211	430	1550	54	3.5	0.47	133|135|634|859|947|960|1607|1839|2065|2069|2149|2151|2161|2247|2252|2624|2670|2683|2735|3053|3084|3091|3371|3399|3552|3569|3818|4015|4067|4217|4321|5055|5156|5270|5328|5329|5359|6288|6506|6648|7043|7422|7474|7980|8837|9162|11009|23671|79625|83478|146206|349667|375033|653145	ADM|ADORA2A|CEACAM1|CAV3|CD34|CD44|DGKB|HBEGF|ERBB3|EREG|F2R|F2RL2|F12|FGF2|FGF7|GATA2|GFAP|B4GALT1|GLI1|SERPIND1|NRG1|HIF1A|TNC|ID3|IL1A|IL6|KLKB1|LOX|LYN|MAP3K5|MMP12|SERPINB2|PDGFRA|SERPINE2|PLAU|PLAUR|PLSCR1|SAA1|SLC1A2|SOD2|TGFB3|VEGFA|WNT5A|TFPI2|CFLAR|DGKI|IL24|TMEFF2|NDNF|ARHGAP24|CARMIL2|RTN4RL2|PEAR1|ANXA8	-7	MyList
GO Biological Processes	19	GO:0032722	positive regulation of chemokine production	19_GO:0048518 positive regulation of biological process	-8.8	5.3	8.4	30211	70	1550	19	1.2	0.28	972|3091|3553|3569|3574|3965|4023|4155|4615|4938|4940|5610|7098|7124|7292|7474|8767|51284|90865	CD74|HIF1A|IL1B|IL6|IL7|LGALS9|LPL|MBP|MYD88|OAS1|OAS3|EIF2AK2|TLR3|TNF|TNFSF4|WNT5A|RIPK2|TLR7|IL33	-6.9	MyList
KEGG Pathway	24	hsa04623	Cytosolic DNA-sensing pathway		-8.8	5.6	8.4	30211	63	1550	18	1.2	0.27	103|661|834|3553|3569|3627|3665|4790|4792|4793|6351|6352|9447|9641|11277|23586|81030|90865	ADAR|POLR3D|CASP1|IL1B|IL6|CXCL10|IRF7|NFKB1|NFKBIA|NFKBIB|CCL4|CCL5|AIM2|IKBKE|TREX1|DDX58|ZBP1|IL33	-6.9	MyList
WikiPathways	27	WP4329	miRNAs involvement in the immune response in sepsis		-8.8	5.6	8.4	30211	63	1550	18	1.2	0.27	3383|3552|3569|3576|3659|3663|3665|4615|4790|4791|4792|5971|6348|6351|7124|7412|51284|114614	ICAM1|IL1A|IL6|CXCL8|IRF1|IRF5|IRF7|MYD88|NFKB1|NFKB2|NFKBIA|RELB|CCL3|CCL4|TNF|VCAM1|TLR7|MIR155HG	-6.9	MyList
GO Biological Processes	19	GO:0040013	negative regulation of locomotion	19_GO:0040011 locomotion	-8.8	2.5	7	30211	396	1550	51	3.3	0.45	134|135|684|972|999|1588|1634|1647|1803|2247|2697|3084|3204|4163|4223|4286|5054|5468|5734|5800|6091|6347|6672|6781|7026|7124|7130|7474|7869|9294|9314|9863|10014|10512|11009|23236|23671|28984|29775|51738|54567|56833|57561|57715|64218|65009|84830|93649|114757|223117|407006	ADORA1|ADORA2A|BST2|CD74|CDH1|CYP19A1|DCN|GADD45A|DPP4|FGF2|GJA1|NRG1|HOXA7|MCC|MEOX2|MITF|SERPINE1|PPARG|PTGER4|PTPRO|ROBO1|CCL2|SP100|STC1|NR2F2|TNF|TNFAIP6|WNT5A|SEMA3B|S1PR2|KLF4|MAGI2|HDAC5|SEMA3C|IL24|PLCB1|TMEFF2|RGCC|CARD10|GHRL|DLL4|SLAMF8|ARRDC3|SEMA4G|SEMA4A|NDRG4|ADTRP|MYOCD|CYGB|SEMA3D|MIR221	-6.9	MyList
GO Biological Processes	19	GO:0050852	T cell receptor signaling pathway	19_GO:0002376 immune system process	-8.8	4.6	8	30211	94	1550	22	1.4	0.3	25|784|868|5142|5293|5788|8767|9473|10384|10385|10616|11118|11119|11120|23149|23180|23308|26191|27242|54718|64332|80149	ABL1|CACNB3|CBLB|PDE4B|PIK3CD|PTPRC|RIPK2|THEMIS2|BTN3A3|BTN2A2|RBCK1|BTN3A2|BTN3A1|BTN2A1|FCHO1|RFTN1|ICOSLG|PTPN22|TNFRSF21|BTN2A3P|NFKBIZ|ZC3H12A	-6.9	MyList
GO Biological Processes	19	GO:0001892	embryonic placenta development	19_GO:0022414 reproductive process	-8.8	4.8	8.1	30211	86	1550	21	1.4	0.29	133|639|1028|1051|1437|2624|3091|3481|3726|3880|3976|6615|6665|7026|7477|7855|7942|9021|23462|84870|113026	ADM|PRDM1|CDKN1C|CEBPB|CSF2|GATA2|HIF1A|IGF2|JUNB|KRT19|LIF|SNAI1|SOX15|NR2F2|WNT7B|FZD5|TFEB|SOCS3|HEY1|RSPO3|PLCD3	-6.9	MyList
GO Biological Processes	19	GO:0048864	stem cell development	19_GO:0032502 developmental process	-8.8	4.8	8.1	30211	86	1550	21	1.4	0.29	1000|1906|2247|2637|2668|3084|3091|3357|3911|5788|6591|6608|6662|7869|8828|9464|10512|57715|64218|157506|223117	CDH2|EDN1|FGF2|GBX2|GDNF|NRG1|HIF1A|HTR2B|LAMA5|PTPRC|SNAI2|SMO|SOX9|SEMA3B|NRP2|HAND2|SEMA3C|SEMA4G|SEMA4A|RDH10|SEMA3D	-6.9	MyList
GO Biological Processes	19	GO:0032870	cellular response to hormone stimulus	19_GO:0050896 response to stimulus	-8.8	2.4	6.9	30211	470	1550	57	3.7	0.48	88|367|445|490|634|652|1520|1583|1906|2308|2852|3177|3481|3624|3718|3815|4005|4067|4654|4790|4824|5468|5563|5732|5734|5916|6751|6772|6776|6781|7023|7292|7352|7357|7494|8013|8835|8837|8912|9734|9882|10014|10148|10458|10603|23236|23516|51738|54541|55022|55809|84709|84830|90226|114814|114907|730249	ACTN2|AR|ASS1|ATP2B1|CEACAM1|BMP4|CTSS|CYP11A1|EDN1|FOXO1|GPER1|SLC29A2|IGF2|INHBA|JAK3|KIT|LMO2|LYN|MYOD1|NFKB1|NKX3-1|PPARG|PRKAA2|PTGER2|PTGER4|RARG|SSTR1|STAT1|STAT5A|STC1|TFAP4|TNFSF4|UCP3|UGCG|XBP1|NR4A3|SOCS2|CFLAR|CACNA1H|HDAC9|TBC1D4|HDAC5|EBI3|BAIAP2|SH2B2|PLCB1|SLC39A14|GHRL|DDIT4|PID1|TRERF1|MGARP|ADTRP|UCN2|GNRHR2|FBXO32|ACOD1	-6.9	MyList
WikiPathways	27	WP2880	Glucocorticoid receptor pathway		-8.7	5.2	8.3	30211	71	1550	19	1.2	0.28	329|330|1028|3589|4791|5142|5552|5743|5997|6347|6364|6591|7128|8436|8507|10602|10769|27063|347902	BIRC2|BIRC3|CDKN1C|IL11|NFKB2|PDE4B|SRGN|PTGS2|RGS2|CCL2|CCL20|SNAI2|TNFAIP3|CAVIN2|ENC1|CDC42EP3|PLK2|ANKRD1|AMIGO2	-6.8	MyList
GO Biological Processes	19	GO:0060760	positive regulation of response to cytokine stimulus	19_GO:0048518 positive regulation of biological process	-8.7	5.5	8.3	30211	64	1550	18	1.2	0.27	834|837|972|1435|1906|3091|3574|3665|4321|7474|8767|9641|23586|54625|64135|81030|83666|117854	CASP1|CASP4|CD74|CSF1|EDN1|HIF1A|IL7|IRF7|MMP12|WNT5A|RIPK2|IKBKE|DDX58|PARP14|IFIH1|ZBP1|PARP9|TRIM6	-6.8	MyList
GO Biological Processes	19	GO:0032648	regulation of interferon-beta production	19_GO:0032501 multicellular organismal process	-8.7	5.8	8.5	30211	57	1550	17	1.1	0.26	661|3659|3663|3665|4938|4939|4940|5971|7098|8767|9111|9636|10475|23586|51284|64135|79132	POLR3D|IRF1|IRF5|IRF7|OAS1|OAS2|OAS3|RELB|TLR3|RIPK2|NMI|ISG15|TRIM38|DDX58|TLR7|IFIH1|DHX58	-6.8	MyList
GO Biological Processes	19	GO:0080135	regulation of cellular response to stress	19_GO:0050896 response to stimulus	-8.7	2.1	6.7	30211	692	1550	74	4.8	0.54	25|624|637|652|859|947|960|972|1540|1647|2081|2308|2643|3091|3309|3552|3553|4067|4189|4217|4314|4582|4615|4824|4862|5371|5610|5743|6591|6615|6648|7098|7124|7185|7422|7474|7477|7494|7873|8013|8091|8382|8531|8767|8870|8876|9283|9314|9464|9709|10333|10347|10769|11153|22891|23236|26191|27063|54407|55504|60401|65078|80149|80237|80317|83666|84900|87178|135112|151636|153769|282679|344558|407006	ABL1|BDKRB2|BID|BMP4|CAV3|CD34|CD44|CD74|CYLD|GADD45A|ERN1|FOXO1|GCH1|HIF1A|HSPA5|IL1A|IL1B|LYN|DNAJB9|MAP3K5|MMP3|MUC1|MYD88|NKX3-1|NPAS2|PML|EIF2AK2|PTGS2|SNAI2|SNAI1|SOD2|TLR3|TNF|TRAF1|VEGFA|WNT5A|WNT7B|XBP1|MANF|NR4A3|HMGA2|NME5|YBX3|RIPK2|IER3|VNN1|GPR37L1|KLF4|HAND2|HERPUD1|TLR6|ABCA7|PLK2|FICD|ZNF365|PLCB1|PTPN22|ANKRD1|SLC38A2|TNFRSF19|EDA2R|RTN4R|ZC3H12A|ELL3|ZKSCAN3|PARP9|RNFT2|PNPT1|N…	-6.8	MyList
GO Biological Processes	19	GO:0044706	multi-multicellular organism process	19_GO:0032501 multicellular organismal process	-8.7	3.2	7.4	30211	198	1550	33	2.1	0.37	133|367|639|1594|1906|2683|3553|3620|3726|3965|3976|4318|5021|5069|5270|5743|5744|5997|6019|6513|6781|7026|7043|7421|8528|8605|10699|23764|23780|51738|54407|730249|100137049	ADM|AR|PRDM1|CYP27B1|EDN1|B4GALT1|IL1B|IDO1|JUNB|LGALS9|LIF|MMP9|OXTR|PAPPA|SERPINE2|PTGS2|PTHLH|RGS2|RLN2|SLC2A1|STC1|NR2F2|TGFB3|VDR|DDO|PLA2G4C|CORIN|MAFF|APOL2|GHRL|SLC38A2|ACOD1|PLA2G4B	-6.8	MyList
GO Biological Processes	19	GO:0048638	regulation of developmental growth	19_GO:0040007 growth	-8.7	2.7	7.1	30211	329	1550	45	2.9	0.43	25|32|367|627|652|825|859|861|1435|1906|2247|2735|3142|3481|3574|4654|4803|5357|5641|5997|5999|6608|6665|6776|7422|7474|7869|8200|8531|8835|10409|10512|22999|23236|23286|28514|51316|51738|57715|57731|64218|65078|80128|84879|223117	ABL1|ACACB|AR|BDNF|BMP4|CAPN3|CAV3|RUNX1|CSF1|EDN1|FGF2|GLI1|HLX|IGF2|IL7|MYOD1|NGF|PLS1|LGMN|RGS2|RGS4|SMO|SOX15|STAT5A|VEGFA|WNT5A|SEMA3B|GDF5|YBX3|SOCS2|BASP1|SEMA3C|RIMS1|PLCB1|WWC1|DLL1|PLAC8|GHRL|SEMA4G|SPTBN4|SEMA4A|RTN4R|TRIM46|MFSD2A|SEMA3D	-6.8	MyList
GO Biological Processes	19	GO:0002819	regulation of adaptive immune response	19_GO:0002376 immune system process	-8.7	3.3	7.4	30211	188	1550	32	2.1	0.36	196|634|718|1379|3106|3133|3134|3142|3553|3569|3575|3592|3594|3659|3665|3718|5788|7124|7128|7133|7292|7855|8767|10673|29126|64332|80149|91543|114548|200558|259307|338322	AHR|CEACAM1|C3|CR1L|HLA-B|HLA-E|HLA-F|HLX|IL1B|IL6|IL7R|IL12A|IL12RB1|IRF1|IRF7|JAK3|PTPRC|TNF|TNFAIP3|TNFRSF1B|TNFSF4|FZD5|RIPK2|TNFSF13B|CD274|NFKBIZ|ZC3H12A|RSAD2|NLRP3|APLF|IL4I1|NLRP10	-6.8	MyList
KEGG Pathway	24	hsa04625	C-type lectin receptor signaling pathway		-8.6	4.3	7.9	30211	104	1550	23	1.5	0.31	834|868|1263|1540|2207|3553|3569|3592|3659|3709|4790|4791|4792|5293|5533|5743|5971|6772|6773|7124|8844|9641|114548	CASP1|CBLB|PLK3|CYLD|FCER1G|IL1B|IL6|IL12A|IRF1|ITPR2|NFKB1|NFKB2|NFKBIA|PIK3CD|PPP3CC|PTGS2|RELB|STAT1|STAT2|TNF|KSR1|IKBKE|NLRP3	-6.8	MyList
GO Biological Processes	19	GO:0060485	mesenchyme development	19_GO:0032502 developmental process	-8.6	3.1	7.3	30211	230	1550	36	2.3	0.38	652|1000|1906|1942|2065|2295|2637|2668|3037|3084|3091|3202|3357|3911|4222|6091|6591|6608|6615|6662|6772|7474|7869|8091|8828|9464|10409|10512|23462|55897|57715|64218|130497|157506|199699|223117	BMP4|CDH2|EDN1|EFNA1|ERBB3|FOXF2|GBX2|GDNF|HAS2|NRG1|HIF1A|HOXA5|HTR2B|LAMA5|MEOX1|ROBO1|SNAI2|SMO|SNAI1|SOX9|STAT1|WNT5A|SEMA3B|HMGA2|NRP2|HAND2|BASP1|SEMA3C|HEY1|MESP1|SEMA4G|SEMA4A|OSR1|RDH10|DAND5|SEMA3D	-6.7	MyList
GO Biological Processes	19	GO:0051153	regulation of striated muscle cell differentiation	19_GO:0032502 developmental process	-8.6	4.5	7.9	30211	96	1550	22	1.4	0.3	627|652|859|1906|1948|3084|4323|4654|5997|5999|6474|7494|9734|10014|22943|28514|55553|55897|79365|93649|168620|284358	BDNF|BMP4|CAV3|EDN1|EFNB2|NRG1|MMP14|MYOD1|RGS2|RGS4|SHOX2|XBP1|HDAC9|HDAC5|DKK1|DLL1|SOX6|MESP1|BHLHE41|MYOCD|BHLHA15|MAMSTR	-6.7	MyList
GO Biological Processes	19	GO:0003002	regionalization	19_GO:0032502 developmental process	-8.5	2.6	7	30211	332	1550	45	2.9	0.43	652|718|1906|1952|2114|2637|2735|2736|3200|3201|3202|3203|3204|3205|3206|3215|3221|3223|3235|4222|4223|4824|5013|5087|5916|6604|6608|6615|6911|7026|7474|7477|7855|8828|10194|10409|10512|22943|23424|23462|28514|54567|55897|79365|130497	BMP4|C3|EDN1|CELSR2|ETS2|GBX2|GLI1|GLI2|HOXA3|HOXA4|HOXA5|HOXA6|HOXA7|HOXA9|HOXA10|HOXB5|HOXC4|HOXC6|HOXD9|MEOX1|MEOX2|NKX3-1|OTX1|PBX1|RARG|SMARCD3|SMO|SNAI1|TBX6|NR2F2|WNT5A|WNT7B|FZD5|NRP2|TSHZ1|BASP1|SEMA3C|DKK1|TDRD7|HEY1|DLL1|DLL4|MESP1|BHLHE41|OSR1	-6.6	MyList
GO Biological Processes	19	GO:0032732	positive regulation of interleukin-1 production	19_GO:0048518 positive regulation of biological process	-8.5	5.1	8.1	30211	73	1550	19	1.2	0.28	834|3428|3569|3965|4023|4615|6288|6348|7124|7474|7855|8767|9447|10333|24145|113277|114548|115362|338322	CASP1|IFI16|IL6|LGALS9|LPL|MYD88|SAA1|CCL3|TNF|WNT5A|FZD5|RIPK2|AIM2|TLR6|PANX1|TMEM106A|NLRP3|GBP5|NLRP10	-6.6	MyList
GO Biological Processes	19	GO:0043269	regulation of ion transport	19_GO:0051179 localization	-8.5	2.1	6.6	30211	685	1550	73	4.7	0.54	18|25|88|134|135|490|623|783|784|825|859|1051|1080|1520|1906|2149|2668|2697|2852|3306|3351|3460|3552|3553|3627|3718|3755|3764|3772|3781|3787|4067|4318|4987|5026|5142|5205|5270|5371|5743|5997|5999|6236|6326|6335|6347|6348|6351|6352|6373|6623|6781|7124|7225|7779|8564|8912|9022|9536|9722|10105|11151|23072|57463|57520|57731|80863|81832|130497|151651|154043|283229|338440	ABAT|ABL1|ACTN2|ADORA1|ADORA2A|ATP2B1|BDKRB1|CACNB2|CACNB3|CAPN3|CAV3|CEBPB|CFTR|CTSS|EDN1|F2R|GDNF|GJA1|GPER1|HSPA2|HTR1B|IFNGR2|IL1A|IL1B|CXCL10|JAK3|KCNG1|KCNJ8|KCNJ15|KCNN2|KCNS1|LYN|MMP9|OPRL1|P2RX5|PDE4B|ATP8B1|SERPINE2|PML|PTGS2|RGS2|RGS4|RRAD|SCN2A|SCN9A|CCL2|CCL3|CCL4|CCL5|CXCL11|SNCG|STC1|TNF|TRPC6|SLC30A1|KMO|CACNA1H|CLIC3|PTGES|NOS1AP|PPIF|CORO1A|HECW1|AMIGO1|HECW2|SPTBN4|PRRT1|NETO1|…	-6.6	MyList
GO Biological Processes	19	GO:1990266	neutrophil migration	19_GO:0040011 locomotion	-8.5	4.6	7.9	30211	89	1550	21	1.4	0.29	2207|2919|2920|2921|3553|3576|3627|3672|5142|5293|6288|6347|6348|6351|6352|6354|6355|6364|6372|6373|6374	FCER1G|CXCL1|CXCL2|CXCL3|IL1B|CXCL8|CXCL10|ITGA1|PDE4B|PIK3CD|SAA1|CCL2|CCL3|CCL4|CCL5|CCL7|CCL8|CCL20|CXCL6|CXCL11|CXCL5	-6.6	MyList
GO Biological Processes	19	GO:0032728	positive regulation of interferon-beta production	19_GO:0048518 positive regulation of biological process	-8.4	7	8.7	30211	39	1550	14	0.9	0.24	661|3659|3663|3665|4938|4939|4940|7098|8767|9636|23586|51284|64135|79132	POLR3D|IRF1|IRF5|IRF7|OAS1|OAS2|OAS3|TLR3|RIPK2|ISG15|DDX58|TLR7|IFIH1|DHX58	-6.6	MyList
GO Biological Processes	19	GO:0002718	regulation of cytokine production involved in immune response	19_GO:0002376 immune system process	-8.4	4.4	7.8	30211	98	1550	22	1.4	0.3	684|972|3133|3134|3553|3569|3718|3815|7043|7098|7124|7133|7292|7474|7855|8013|23586|51704|91543|114548|117854|144811	BST2|CD74|HLA-E|HLA-F|IL1B|IL6|JAK3|KIT|TGFB3|TLR3|TNF|TNFRSF1B|TNFSF4|WNT5A|FZD5|NR4A3|DDX58|GPRC5B|RSAD2|NLRP3|TRIM6|LACC1	-6.5	MyList
GO Biological Processes	19	GO:0010952	positive regulation of peptidase activity	19_GO:0048518 positive regulation of biological process	-8.4	3.2	7.3	30211	192	1550	32	2.1	0.36	637|668|834|843|1942|2149|2852|3428|3965|4067|4155|4217|4824|5371|5468|5641|5721|6091|7023|7124|8743|8767|8837|9447|10017|27141|55075|64115|80758|83595|84630|114548	BID|FOXL2|CASP1|CASP10|EFNA1|F2R|GPER1|IFI16|LGALS9|LYN|MBP|MAP3K5|NKX3-1|PML|PPARG|LGMN|PSME2|ROBO1|TFAP4|TNF|TNFSF10|RIPK2|CFLAR|AIM2|BCL2L10|CIDEB|UACA|VSIR|PRR7|SOX7|TTBK1|NLRP3	-6.5	MyList
GO Biological Processes	19	GO:0032946	positive regulation of mononuclear cell proliferation	19_GO:0048518 positive regulation of biological process	-8.4	3.7	7.5	30211	143	1550	27	1.7	0.33	972|1435|3133|3481|3552|3553|3569|3574|3592|3594|3718|3965|4615|5788|6352|7292|7412|8767|10148|10673|11151|23308|26191|29126|57829|80380|283234	CD74|CSF1|HLA-E|IGF2|IL1A|IL1B|IL6|IL7|IL12A|IL12RB1|JAK3|LGALS9|MYD88|PTPRC|CCL5|TNFSF4|VCAM1|RIPK2|EBI3|TNFSF13B|CORO1A|ICOSLG|PTPN22|CD274|ZP4|PDCD1LG2|CCDC88B	-6.5	MyList
GO Biological Processes	19	GO:2001056	positive regulation of cysteine-type endopeptidase activity	19_GO:0048518 positive regulation of biological process	-8.4	3.7	7.5	30211	143	1550	27	1.7	0.33	637|668|834|843|2149|2852|3428|3965|4217|4824|5371|5468|5641|6091|7023|7124|8743|8767|8837|9447|10017|27141|55075|80758|83595|84630|114548	BID|FOXL2|CASP1|CASP10|F2R|GPER1|IFI16|LGALS9|MAP3K5|NKX3-1|PML|PPARG|LGMN|ROBO1|TFAP4|TNF|TNFSF10|RIPK2|CFLAR|AIM2|BCL2L10|CIDEB|UACA|PRR7|SOX7|TTBK1|NLRP3	-6.5	MyList
GO Biological Processes	19	GO:0046649	lymphocyte activation	19_GO:0002376 immune system process	-8.4	2.4	6.8	30211	407	1550	51	3.3	0.45	25|684|868|960|972|1803|2207|2697|3133|3383|3569|3574|3575|3589|3659|3714|3718|3815|3936|4189|4683|5087|5293|5699|5734|5788|5971|7292|7412|7462|7855|8767|8995|9580|9734|9760|10014|10148|10673|11119|11151|23308|26191|27086|28514|54567|56833|64218|80758|84941|91543	ABL1|BST2|CBLB|CD44|CD74|DPP4|FCER1G|GJA1|HLA-E|ICAM1|IL6|IL7|IL7R|IL11|IRF1|JAG2|JAK3|KIT|LCP1|DNAJB9|NBN|PBX1|PIK3CD|PSMB10|PTGER4|PTPRC|RELB|TNFSF4|VCAM1|LAT2|FZD5|RIPK2|TNFSF18|SOX13|HDAC9|TOX|HDAC5|EBI3|TNFSF13B|BTN3A1|CORO1A|ICOSLG|PTPN22|FOXP1|DLL1|DLL4|SLAMF8|SEMA4A|PRR7|HSH2D|RSAD2	-6.5	MyList
GO Biological Processes	19	GO:0002822	regulation of adaptive immune response based on somatic recombination of immune receptors built from immunoglobulin superfamily domains	19_GO:0002376 immune system process	-8.3	3.4	7.3	30211	173	1550	30	1.9	0.35	196|634|718|1379|3106|3133|3134|3142|3553|3569|3575|3592|3594|3718|5788|7124|7128|7133|7292|7855|8767|10673|29126|64332|80149|91543|114548|200558|259307|338322	AHR|CEACAM1|C3|CR1L|HLA-B|HLA-E|HLA-F|HLX|IL1B|IL6|IL7R|IL12A|IL12RB1|JAK3|PTPRC|TNF|TNFAIP3|TNFRSF1B|TNFSF4|FZD5|RIPK2|TNFSF13B|CD274|NFKBIZ|ZC3H12A|RSAD2|NLRP3|APLF|IL4I1|NLRP10	-6.5	MyList
GO Biological Processes	19	GO:0034340	response to type I interferon	19_GO:0044419 biological process involved in interspecies interaction between organisms	-8.3	8.4	9.1	30211	28	1550	12	0.77	0.22	3434|3455|3665|4599|4615|4939|6672|6772|6773|9636|11277|55337	IFIT1|IFNAR2|IRF7|MX1|MYD88|OAS2|SP100|STAT1|STAT2|ISG15|TREX1|SHFL	-6.5	MyList
GO Biological Processes	19	GO:1903038	negative regulation of leukocyte cell-cell adhesion	19_GO:0022610 biological adhesion	-8.3	3.7	7.4	30211	144	1550	27	1.7	0.33	135|445|634|652|861|868|972|1051|3142|3620|3659|3718|3902|3965|7292|9314|10385|26191|27242|29126|64115|80149|80380|84830|259307|282618|407006	ADORA2A|ASS1|CEACAM1|BMP4|RUNX1|CBLB|CD74|CEBPB|HLX|IDO1|IRF1|JAK3|LAG3|LGALS9|TNFSF4|KLF4|BTN2A2|PTPN22|TNFRSF21|CD274|VSIR|ZC3H12A|PDCD1LG2|ADTRP|IL4I1|IFNL1|MIR221	-6.5	MyList
GO Biological Processes	19	GO:0051962	positive regulation of nervous system development	19_GO:0032502 developmental process	-8.3	2.8	7	30211	269	1550	39	2.5	0.4	627|2049|2670|2852|3091|3398|3553|3569|3815|3976|4067|4803|5021|5270|5364|6091|6474|6604|6608|7124|7133|7422|7424|10458|10636|22865|22891|23129|51738|57463|64218|80237|84630|114798|139065|146433|347731|347902|407006	BDNF|EPHB3|GFAP|GPER1|HIF1A|ID2|IL1B|IL6|KIT|LIF|LYN|NGF|OXTR|SERPINE2|PLXNB1|ROBO1|SHOX2|SMARCD3|SMO|TNF|TNFRSF1B|VEGFA|VEGFC|BAIAP2|RGS14|SLITRK3|ZNF365|PLXND1|GHRL|AMIGO1|SEMA4A|ELL3|TTBK1|SLITRK1|SLITRK4|IL34|LRRTM3|AMIGO2|MIR221	-6.4	MyList
GO Biological Processes	19	GO:0042060	wound healing	19_GO:0050896 response to stimulus	-8.3	2.6	6.9	30211	326	1550	44	2.8	0.42	135|634|859|947|960|1607|1839|2065|2069|2149|2151|2161|2247|2624|2683|3053|3084|3091|3552|3569|3818|4015|4217|4321|5055|5156|5270|5328|5329|5359|6288|7043|7422|7474|7980|8837|9162|11009|23671|79625|83478|146206|375033|653145	ADORA2A|CEACAM1|CAV3|CD34|CD44|DGKB|HBEGF|ERBB3|EREG|F2R|F2RL2|F12|FGF2|GATA2|B4GALT1|SERPIND1|NRG1|HIF1A|IL1A|IL6|KLKB1|LOX|MAP3K5|MMP12|SERPINB2|PDGFRA|SERPINE2|PLAU|PLAUR|PLSCR1|SAA1|TGFB3|VEGFA|WNT5A|TFPI2|CFLAR|DGKI|IL24|TMEFF2|NDNF|ARHGAP24|CARMIL2|PEAR1|ANXA8	-6.4	MyList
GO Biological Processes	19	GO:1903131	mononuclear cell differentiation	19_GO:0002376 immune system process	-8.3	2.7	6.9	30211	292	1550	41	2.6	0.41	25|652|972|1437|2207|3428|3569|3574|3575|3589|3659|3696|3714|3718|3815|4067|4189|5087|5293|5468|5734|5788|5971|7412|7422|7855|9580|9734|9760|10014|10673|26191|27086|28514|54567|55509|56833|64218|80758|91543|116071	ABL1|BMP4|CD74|CSF2|FCER1G|IFI16|IL6|IL7|IL7R|IL11|IRF1|ITGB8|JAG2|JAK3|KIT|LYN|DNAJB9|PBX1|PIK3CD|PPARG|PTGER4|PTPRC|RELB|VCAM1|VEGFA|FZD5|SOX13|HDAC9|TOX|HDAC5|TNFSF13B|PTPN22|FOXP1|DLL1|DLL4|BATF3|SLAMF8|SEMA4A|PRR7|RSAD2|BATF2	-6.4	MyList
GO Biological Processes	19	GO:0048667	cell morphogenesis involved in neuron differentiation	19_GO:0032502 developmental process	-8.2	2.4	6.7	30211	411	1550	51	3.3	0.45	25|627|885|1906|1942|1948|1952|2044|2049|2050|2115|2637|2668|2736|3798|3909|3911|3918|4130|4891|4917|5357|5364|5800|6091|6608|7422|7474|7869|8577|8828|9890|10458|10512|22865|22891|22903|23129|26050|54538|56956|57463|57715|57731|64218|65078|80128|84879|114798|139065|223117	ABL1|BDNF|CCK|EDN1|EFNA1|EFNB2|CELSR2|EPHA5|EPHB3|EPHB4|ETV1|GBX2|GDNF|GLI2|KIF5A|LAMA3|LAMA5|LAMC2|MAP1A|SLC11A2|NTN3|PLS1|PLXNB1|PTPRO|ROBO1|SMO|VEGFA|WNT5A|SEMA3B|TMEFF1|NRP2|PLPPR4|BAIAP2|SEMA3C|SLITRK3|ZNF365|BTBD3|PLXND1|SLITRK5|ROBO4|LHX9|AMIGO1|SEMA4G|SPTBN4|SEMA4A|RTN4R|TRIM46|MFSD2A|SLITRK1|SLITRK4|SEMA3D	-6.4	MyList
GO Biological Processes	19	GO:0051480	regulation of cytosolic calcium ion concentration	19_GO:0065007 biological regulation	-8.2	2.7	6.9	30211	316	1550	43	2.8	0.42	25|133|134|146|490|623|624|719|783|784|825|859|1901|1903|1906|2149|2151|2247|2624|2769|2852|3351|3357|3627|3709|3718|4987|5021|5026|5156|5732|5734|5739|5788|6288|6348|6373|7225|7474|8989|51554|51738|114897	ABL1|ADM|ADORA1|ADRA1D|ATP2B1|BDKRB1|BDKRB2|C3AR1|CACNB2|CACNB3|CAPN3|CAV3|S1PR1|S1PR3|EDN1|F2R|F2RL2|FGF2|GATA2|GNA15|GPER1|HTR1B|HTR2B|CXCL10|ITPR2|JAK3|OPRL1|OXTR|P2RX5|PDGFRA|PTGER2|PTGER4|PTGIR|PTPRC|SAA1|CCL3|CXCL11|TRPC6|WNT5A|TRPA1|ACKR4|GHRL|C1QTNF1	-6.4	MyList
GO Biological Processes	19	GO:0048706	embryonic skeletal system development	19_GO:0032502 developmental process	-8.2	3.8	7.5	30211	127	1550	25	1.6	0.32	579|652|3198|3200|3201|3202|3203|3204|3205|3215|3221|3223|3235|4323|5087|5156|6474|6935|7043|7474|9464|56243|116039|130497|157506	NKX3-2|BMP4|HOXA1|HOXA3|HOXA4|HOXA5|HOXA6|HOXA7|HOXA9|HOXB5|HOXC4|HOXC6|HOXD9|MMP14|PBX1|PDGFRA|SHOX2|ZEB1|TGFB3|WNT5A|HAND2|KIAA1217|OSR2|OSR1|RDH10	-6.4	MyList
GO Biological Processes	19	GO:0097529	myeloid leukocyte migration	19_GO:0040011 locomotion	-8.2	3.8	7.5	30211	127	1550	25	1.6	0.32	2207|2321|2919|2920|2921|3553|3569|3576|3627|3672|3815|5142|5293|5800|6288|6347|6348|6351|6352|6354|6355|6364|6372|6373|6374	FCER1G|FLT1|CXCL1|CXCL2|CXCL3|IL1B|IL6|CXCL8|CXCL10|ITGA1|KIT|PDE4B|PIK3CD|PTPRO|SAA1|CCL2|CCL3|CCL4|CCL5|CCL7|CCL8|CCL20|CXCL6|CXCL11|CXCL5	-6.4	MyList
GO Biological Processes	19	GO:0001933	negative regulation of protein phosphorylation	19_GO:0048519 negative regulation of biological process	-8.2	2.6	6.8	30211	341	1550	45	2.9	0.43	25|103|135|623|624|634|652|859|868|1028|1647|3553|4067|5468|5783|5788|5794|5800|5997|7023|7026|7128|7453|8613|9021|9052|10019|10636|22943|26191|27124|28951|50855|54541|54625|55022|79007|80149|84327|93649|116496|124790|154043|374462|100506658	ABL1|ADAR|ADORA2A|BDKRB1|BDKRB2|CEACAM1|BMP4|CAV3|CBLB|CDKN1C|GADD45A|IL1B|LYN|PPARG|PTPN13|PTPRC|PTPRH|PTPRO|RGS2|TFAP4|NR2F2|TNFAIP3|WARS1|PLPP3|SOCS3|GPRC5A|SH2B3|RGS14|DKK1|PTPN22|INPP5J|TRIB2|PARD6A|DDIT4|PARP14|PID1|DBNDD1|ZC3H12A|ZBED3|MYOCD|NIBAN1|HEXIM2|CNKSR3|PTPRQ|OCLN	-6.3	MyList
GO Biological Processes	19	GO:0007409	axonogenesis	19_GO:0032502 developmental process	-8.1	2.6	6.8	30211	342	1550	45	2.9	0.43	25|627|885|1906|1942|1948|2044|2049|2050|2115|2637|2668|2736|3798|3909|3911|3918|4130|4917|5364|5800|6091|6608|7422|7474|7869|8577|8828|9890|10458|10512|22865|23129|26050|54538|56956|57463|57715|57731|64218|65078|80128|114798|139065|223117	ABL1|BDNF|CCK|EDN1|EFNA1|EFNB2|EPHA5|EPHB3|EPHB4|ETV1|GBX2|GDNF|GLI2|KIF5A|LAMA3|LAMA5|LAMC2|MAP1A|NTN3|PLXNB1|PTPRO|ROBO1|SMO|VEGFA|WNT5A|SEMA3B|TMEFF1|NRP2|PLPPR4|BAIAP2|SEMA3C|SLITRK3|PLXND1|SLITRK5|ROBO4|LHX9|AMIGO1|SEMA4G|SPTBN4|SEMA4A|RTN4R|TRIM46|SLITRK1|SLITRK4|SEMA3D	-6.3	MyList
WikiPathways	27	WP1772	Apoptosis modulation and signaling		-8.1	4.4	7.6	30211	93	1550	21	1.4	0.29	329|330|597|637|834|837|840|843|4217|4615|4790|4792|4982|5783|7133|8718|8739|8743|8795|8837|10017	BIRC2|BIRC3|BCL2A1|BID|CASP1|CASP4|CASP7|CASP10|MAP3K5|MYD88|NFKB1|NFKBIA|TNFRSF11B|PTPN13|TNFRSF1B|TNFRSF25|HRK|TNFSF10|TNFRSF10B|CFLAR|BCL2L10	-6.3	MyList
GO Biological Processes	19	GO:0051048	negative regulation of secretion	19_GO:0051179 localization	-8.1	3.4	7.2	30211	167	1550	29	1.9	0.34	18|134|634|972|1906|2065|2149|2697|3084|3134|3351|3553|3589|3592|3598|3623|3624|3965|3976|5021|7124|7133|7779|51738|79651|80223|84830|90007|91543	ABAT|ADORA1|CEACAM1|CD74|EDN1|ERBB3|F2R|GJA1|NRG1|HLA-F|HTR1B|IL1B|IL11|IL12A|IL13RA2|INHA|INHBA|LGALS9|LIF|OXTR|TNF|TNFRSF1B|SLC30A1|GHRL|RHBDF2|RAB11FIP1|ADTRP|MIDN|RSAD2	-6.3	MyList
GO Biological Processes	19	GO:0002700	regulation of production of molecular mediator of immune response	19_GO:0002376 immune system process	-8.1	3.4	7.2	30211	167	1550	29	1.9	0.34	684|972|3133|3134|3553|3569|3598|3718|3815|4189|5788|7043|7098|7124|7133|7292|7474|7494|7855|8013|11277|23586|26191|51704|91543|114548|117854|144811|200558	BST2|CD74|HLA-E|HLA-F|IL1B|IL6|IL13RA2|JAK3|KIT|DNAJB9|PTPRC|TGFB3|TLR3|TNF|TNFRSF1B|TNFSF4|WNT5A|XBP1|FZD5|NR4A3|TREX1|DDX58|PTPN22|GPRC5B|RSAD2|NLRP3|TRIM6|LACC1|APLF	-6.3	MyList
GO Biological Processes	19	GO:0032729	positive regulation of interferon-gamma production	19_GO:0048518 positive regulation of biological process	-8.1	4.8	7.8	30211	77	1550	19	1.2	0.28	25|3553|3592|3594|3965|5142|7098|7124|7292|7474|7855|8767|9636|10148|11118|11119|26191|51284|282618	ABL1|IL1B|IL12A|IL12RB1|LGALS9|PDE4B|TLR3|TNF|TNFSF4|WNT5A|FZD5|RIPK2|ISG15|EBI3|BTN3A2|BTN3A1|PTPN22|TLR7|IFNL1	-6.2	MyList
KEGG Pathway	24	hsa05142	Chagas disease		-8.1	4.2	7.5	30211	102	1550	22	1.4	0.3	624|718|2769|3460|3553|3569|3576|3592|4615|4790|4792|5054|5293|5330|6347|6348|6352|7043|7124|8837|10333|23236	BDKRB2|C3|GNA15|IFNGR2|IL1B|IL6|CXCL8|IL12A|MYD88|NFKB1|NFKBIA|SERPINE1|PIK3CD|PLCB2|CCL2|CCL3|CCL5|TGFB3|TNF|CFLAR|TLR6|PLCB1	-6.2	MyList
WikiPathways	27	WP2064	Neural crest differentiation		-8.1	4.2	7.5	30211	102	1550	22	1.4	0.3	652|999|1000|2113|2247|2637|2670|3198|3397|4155|4286|4790|4791|6591|6615|6662|6911|9734|10014|28514|54567|79885	BMP4|CDH1|CDH2|ETS1|FGF2|GBX2|GFAP|HOXA1|ID1|MBP|MITF|NFKB1|NFKB2|SNAI2|SNAI1|SOX9|TBX6|HDAC9|HDAC5|DLL1|DLL4|HDAC11	-6.2	MyList
GO Biological Processes	19	GO:0032731	positive regulation of interleukin-1 beta production	19_GO:0048518 positive regulation of biological process	-8.1	5.3	8	30211	62	1550	17	1.1	0.26	834|3428|3569|3965|4023|4615|6348|7124|7474|7855|8767|9447|10333|24145|113277|114548|115362	CASP1|IFI16|IL6|LGALS9|LPL|MYD88|CCL3|TNF|WNT5A|FZD5|RIPK2|AIM2|TLR6|PANX1|TMEM106A|NLRP3|GBP5	-6.2	MyList
GO Biological Processes	19	GO:0048762	mesenchymal cell differentiation	19_GO:0032502 developmental process	-8	3.4	7.1	30211	168	1550	29	1.9	0.34	652|1000|1906|1942|2295|2637|2668|3037|3084|3091|3357|3911|6591|6608|6615|6662|6772|7474|7869|8091|8828|9464|10512|23462|57715|64218|130497|157506|223117	BMP4|CDH2|EDN1|EFNA1|FOXF2|GBX2|GDNF|HAS2|NRG1|HIF1A|HTR2B|LAMA5|SNAI2|SMO|SNAI1|SOX9|STAT1|WNT5A|SEMA3B|HMGA2|NRP2|HAND2|SEMA3C|HEY1|SEMA4G|SEMA4A|OSR1|RDH10|SEMA3D	-6.2	MyList
WikiPathways	27	WP4891	COVID-19 adverse outcome pathway		-8	12	9.6	30211	15	1550	9	0.58	0.19	1440|3553|3569|3574|3576|3627|6347|6348|7124	CSF3|IL1B|IL6|IL7|CXCL8|CXCL10|CCL2|CCL3|TNF	-6.2	MyList
WikiPathways	27	WP231	TNF-alpha signaling pathway		-8	4.4	7.6	30211	94	1550	21	1.4	0.29	329|330|637|840|1326|3569|4217|4790|4791|4792|4793|4794|5606|6347|7124|7128|7133|7185|8837|8844|257397	BIRC2|BIRC3|BID|CASP7|MAP3K8|IL6|MAP3K5|NFKB1|NFKB2|NFKBIA|NFKBIB|NFKBIE|MAP2K3|CCL2|TNF|TNFAIP3|TNFRSF1B|TRAF1|CFLAR|KSR1|TAB3	-6.2	MyList
GO Biological Processes	19	GO:0045582	positive regulation of T cell differentiation	19_GO:0022610 biological adhesion	-8	4.4	7.6	30211	94	1550	21	1.4	0.29	861|972|2736|3142|3574|3575|3594|3965|5788|6666|7292|7494|8767|8876|9308|9580|10385|64115|64332|114548|259307	RUNX1|CD74|GLI2|HLX|IL7|IL7R|IL12RB1|LGALS9|PTPRC|SOX12|TNFSF4|XBP1|RIPK2|VNN1|CD83|SOX13|BTN2A2|VSIR|NFKBIZ|NLRP3|IL4I1	-6.2	MyList
GO Biological Processes	19	GO:0048812	neuron projection morphogenesis	19_GO:0032502 developmental process	-8	2.3	6.6	30211	455	1550	54	3.5	0.47	25|135|627|885|1906|1942|1948|1952|2044|2049|2050|2115|2637|2668|2736|2823|3672|3798|3909|3911|3918|4130|4803|4891|4917|5364|5800|6091|6608|7422|7474|7477|7869|8577|8828|9890|10458|10512|22865|22891|22903|23129|26050|54538|56956|57463|57715|57731|64218|65078|80128|114798|139065|223117	ABL1|ADORA2A|BDNF|CCK|EDN1|EFNA1|EFNB2|CELSR2|EPHA5|EPHB3|EPHB4|ETV1|GBX2|GDNF|GLI2|GPM6A|ITGA1|KIF5A|LAMA3|LAMA5|LAMC2|MAP1A|NGF|SLC11A2|NTN3|PLXNB1|PTPRO|ROBO1|SMO|VEGFA|WNT5A|WNT7B|SEMA3B|TMEFF1|NRP2|PLPPR4|BAIAP2|SEMA3C|SLITRK3|ZNF365|BTBD3|PLXND1|SLITRK5|ROBO4|LHX9|AMIGO1|SEMA4G|SPTBN4|SEMA4A|RTN4R|TRIM46|SLITRK1|SLITRK4|SEMA3D	-6.2	MyList
GO Biological Processes	19	GO:0042102	positive regulation of T cell proliferation	19_GO:0022610 biological adhesion	-8	4.2	7.5	30211	103	1550	22	1.4	0.3	3133|3481|3552|3553|3569|3594|3718|3965|5788|6352|7292|7412|8767|10148|10673|11151|23308|26191|29126|57829|80380|283234	HLA-E|IGF2|IL1A|IL1B|IL6|IL12RB1|JAK3|LGALS9|PTPRC|CCL5|TNFSF4|VCAM1|RIPK2|EBI3|TNFSF13B|CORO1A|ICOSLG|PTPN22|CD274|ZP4|PDCD1LG2|CCDC88B	-6.2	MyList
GO Biological Processes	19	GO:0031400	negative regulation of protein modification process	19_GO:0048519 negative regulation of biological process	-8	2.2	6.5	30211	519	1550	59	3.8	0.49	25|103|135|623|624|634|652|825|859|868|1028|1647|3553|4067|5468|5563|5783|5788|5794|5800|5997|6737|7023|7026|7124|7128|7453|8613|9021|9052|9636|10019|10636|22943|23251|26191|27124|28951|28999|50855|54541|54625|55022|79007|80149|80758|84101|84327|84875|84930|93649|116496|124790|135112|151636|153769|154043|374462|100506658	ABL1|ADAR|ADORA2A|BDKRB1|BDKRB2|CEACAM1|BMP4|CAPN3|CAV3|CBLB|CDKN1C|GADD45A|IL1B|LYN|PPARG|PRKAA2|PTPN13|PTPRC|PTPRH|PTPRO|RGS2|TRIM21|TFAP4|NR2F2|TNF|TNFAIP3|WARS1|PLPP3|SOCS3|GPRC5A|ISG15|SH2B3|RGS14|DKK1|MINAR1|PTPN22|INPP5J|TRIB2|KLF15|PARD6A|DDIT4|PARP14|PID1|DBNDD1|ZC3H12A|PRR7|USP44|ZBED3|PARP10|MASTL|MYOCD|NIBAN1|HEXIM2|NCOA7|DTX3L|SH3RF2|CNKSR3|PTPRQ|OCLN	-6.2	MyList
GO Biological Processes	19	GO:0042326	negative regulation of phosphorylation	19_GO:0048519 negative regulation of biological process	-8	2.4	6.6	30211	382	1550	48	3.1	0.44	25|103|135|623|624|634|652|859|868|1028|1647|3553|3623|3624|4067|5468|5783|5788|5794|5800|5997|7023|7026|7128|7453|8613|9021|9052|10019|10636|22943|26191|27124|28951|50855|54541|54625|55022|79007|80149|84327|90007|93649|116496|124790|154043|374462|100506658	ABL1|ADAR|ADORA2A|BDKRB1|BDKRB2|CEACAM1|BMP4|CAV3|CBLB|CDKN1C|GADD45A|IL1B|INHA|INHBA|LYN|PPARG|PTPN13|PTPRC|PTPRH|PTPRO|RGS2|TFAP4|NR2F2|TNFAIP3|WARS1|PLPP3|SOCS3|GPRC5A|SH2B3|RGS14|DKK1|PTPN22|INPP5J|TRIB2|PARD6A|DDIT4|PARP14|PID1|DBNDD1|ZC3H12A|ZBED3|MIDN|MYOCD|NIBAN1|HEXIM2|CNKSR3|PTPRQ|OCLN	-6.1	MyList
WikiPathways	27	WP2036	TNF-related weak inducer of apoptosis (TWEAK) signaling pathway		-7.9	6.5	8.3	30211	42	1550	14	0.9	0.24	329|330|840|3569|4318|4790|4791|4792|4793|5971|6347|6352|7124|7185	BIRC2|BIRC3|CASP7|IL6|MMP9|NFKB1|NFKB2|NFKBIA|NFKBIB|RELB|CCL2|CCL5|TNF|TRAF1	-6.1	MyList
GO Biological Processes	19	GO:0050691	regulation of defense response to virus by host	19_GO:0044419 biological process involved in interspecies interaction between organisms	-7.9	6.5	8.3	30211	42	1550	14	0.9	0.24	3553|3594|4321|6772|7128|9447|23586|26191|60489|80149|83666|117854|151636|200316	IL1B|IL12RB1|MMP12|STAT1|TNFAIP3|AIM2|DDX58|PTPN22|APOBEC3G|ZC3H12A|PARP9|TRIM6|DTX3L|APOBEC3F	-6.1	MyList
GO Biological Processes	19	GO:0060338	regulation of type I interferon-mediated signaling pathway	19_GO:0044419 biological process involved in interspecies interaction between organisms	-7.9	6.5	8.3	30211	42	1550	14	0.9	0.24	103|3665|4321|4938|4940|6773|7474|9636|9641|11274|11277|25939|81030|117854	ADAR|IRF7|MMP12|OAS1|OAS3|STAT2|WNT5A|ISG15|IKBKE|USP18|TREX1|SAMHD1|ZBP1|TRIM6	-6.1	MyList
GO Biological Processes	19	GO:0032990	cell part morphogenesis	19_GO:0032502 developmental process	-7.9	2.3	6.5	30211	482	1550	56	3.6	0.47	25|135|627|885|1906|1942|1948|1952|2044|2049|2050|2115|2637|2668|2736|2823|3672|3798|3909|3911|3918|4130|4803|4891|4917|5364|5800|6091|6608|7422|7474|7477|7869|8577|8828|9890|10458|10512|22865|22891|22903|23129|26050|54538|55022|56956|57463|57715|57731|64218|65078|80128|87178|114798|139065|223117	ABL1|ADORA2A|BDNF|CCK|EDN1|EFNA1|EFNB2|CELSR2|EPHA5|EPHB3|EPHB4|ETV1|GBX2|GDNF|GLI2|GPM6A|ITGA1|KIF5A|LAMA3|LAMA5|LAMC2|MAP1A|NGF|SLC11A2|NTN3|PLXNB1|PTPRO|ROBO1|SMO|VEGFA|WNT5A|WNT7B|SEMA3B|TMEFF1|NRP2|PLPPR4|BAIAP2|SEMA3C|SLITRK3|ZNF365|BTBD3|PLXND1|SLITRK5|ROBO4|PID1|LHX9|AMIGO1|SEMA4G|SPTBN4|SEMA4A|RTN4R|TRIM46|PNPT1|SLITRK1|SLITRK4|SEMA3D	-6.1	MyList
GO Biological Processes	19	GO:0048661	positive regulation of smooth muscle cell proliferation	19_GO:0048518 positive regulation of biological process	-7.9	4.3	7.5	30211	95	1550	21	1.4	0.29	652|1839|1901|1906|2069|2081|2247|2697|3351|3398|3569|4217|4318|4615|5743|6352|6772|7124|8013|27086|407006	BMP4|HBEGF|S1PR1|EDN1|EREG|ERN1|FGF2|GJA1|HTR1B|ID2|IL6|MAP3K5|MMP9|MYD88|PTGS2|CCL5|STAT1|TNF|NR4A3|FOXP1|MIR221	-6.1	MyList
GO Biological Processes	19	GO:0051346	negative regulation of hydrolase activity	19_GO:0065007 biological regulation	-7.9	2.5	6.6	30211	371	1550	47	3	0.44	25|135|329|330|341|684|718|960|1294|1410|2537|2644|3053|3428|3699|4318|4803|5054|5055|5270|5271|5329|5743|5806|5918|5997|6195|6318|7124|7422|7980|9314|9734|11153|23516|25816|27074|54583|79661|84930|89932|114769|145376|154796|327657|653145|728113	ABL1|ADORA2A|BIRC2|BIRC3|APOC1|BST2|C3|CD44|COL7A1|CRYAB|IFI6|GCHFR|SERPIND1|IFI16|ITIH3|MMP9|NGF|SERPINE1|SERPINB2|SERPINE2|SERPINB8|PLAUR|PTGS2|PTX3|RARRES1|RGS2|RPS6KA1|SERPINB4|TNF|VEGFA|TFPI2|KLF4|HDAC9|FICD|SLC39A14|TNFAIP8|LAMP3|EGLN1|NEIL1|MASTL|PAPLN|CARD16|PPP1R36|AMOT|SERPINA9|ANXA8|ANXA8L1	-6.1	MyList
GO Biological Processes	19	GO:0071417	cellular response to organonitrogen compound	19_GO:0050896 response to stimulus	-7.9	2.1	6.4	30211	573	1550	63	4.1	0.5	15|25|88|196|445|634|837|840|859|999|1051|1080|1129|1583|1906|2308|2697|2769|2852|3177|3309|3351|3357|3383|3397|3481|3709|3718|4067|4790|5142|5156|5468|5641|5743|6506|6662|6772|6776|6781|6935|7124|7412|7494|8013|8767|8835|8837|9734|9882|10014|10333|10458|10603|23236|23516|26191|28999|51274|54464|57463|84709|114814	AANAT|ABL1|ACTN2|AHR|ASS1|CEACAM1|CASP4|CASP7|CAV3|CDH1|CEBPB|CFTR|CHRM2|CYP11A1|EDN1|FOXO1|GJA1|GNA15|GPER1|SLC29A2|HSPA5|HTR1B|HTR2B|ICAM1|ID1|IGF2|ITPR2|JAK3|LYN|NFKB1|PDE4B|PDGFRA|PPARG|LGMN|PTGS2|SLC1A2|SOX9|STAT1|STAT5A|STC1|ZEB1|TNF|VCAM1|XBP1|NR4A3|RIPK2|SOCS2|CFLAR|HDAC9|TBC1D4|HDAC5|TLR6|BAIAP2|SH2B2|PLCB1|SLC39A14|PTPN22|KLF15|KLF3|XRN1|AMIGO1|MGARP|GNRHR2	-6.1	MyList
GO Biological Processes	19	GO:0042110	T cell activation	19_GO:0002376 immune system process	-7.9	2.8	6.8	30211	255	1550	37	2.4	0.39	25|868|960|972|1803|2207|2697|3133|3383|3569|3574|3575|3659|3714|3815|3936|5293|5699|5734|5788|5971|7292|7855|8767|8995|9580|9760|10148|11119|23308|26191|27086|54567|64218|80758|84941|91543	ABL1|CBLB|CD44|CD74|DPP4|FCER1G|GJA1|HLA-E|ICAM1|IL6|IL7|IL7R|IRF1|JAG2|KIT|LCP1|PIK3CD|PSMB10|PTGER4|PTPRC|RELB|TNFSF4|FZD5|RIPK2|TNFSF18|SOX13|TOX|EBI3|BTN3A1|ICOSLG|PTPN22|FOXP1|DLL4|SEMA4A|PRR7|HSH2D|RSAD2	-6.1	MyList
GO Biological Processes	19	GO:0009612	response to mechanical stimulus	19_GO:0050896 response to stimulus	-7.9	3.1	7	30211	201	1550	32	2.1	0.36	623|834|859|1000|1116|1647|1906|2115|3553|3627|3659|3815|4323|4615|4790|4792|5270|5734|5743|6513|6662|6772|7098|7124|8200|8795|8989|10628|27063|51284|54407|114780	BDKRB1|CASP1|CAV3|CDH2|CHI3L1|GADD45A|EDN1|ETV1|IL1B|CXCL10|IRF1|KIT|MMP14|MYD88|NFKB1|NFKBIA|SERPINE2|PTGER4|PTGS2|SLC2A1|SOX9|STAT1|TLR3|TNF|GDF5|TNFRSF10B|TRPA1|TXNIP|ANKRD1|TLR7|SLC38A2|PKD1L2	-6.1	MyList
GO Biological Processes	19	GO:0050671	positive regulation of lymphocyte proliferation	19_GO:0002376 immune system process	-7.9	3.6	7.2	30211	141	1550	26	1.7	0.33	972|3133|3481|3552|3553|3569|3574|3592|3594|3718|3965|4615|5788|6352|7292|7412|8767|10148|10673|11151|23308|26191|29126|57829|80380|283234	CD74|HLA-E|IGF2|IL1A|IL1B|IL6|IL7|IL12A|IL12RB1|JAK3|LGALS9|MYD88|PTPRC|CCL5|TNFSF4|VCAM1|RIPK2|EBI3|TNFSF13B|CORO1A|ICOSLG|PTPN22|CD274|ZP4|PDCD1LG2|CCDC88B	-6.1	MyList
GO Biological Processes	19	GO:0050819	negative regulation of coagulation	19_GO:0048519 negative regulation of biological process	-7.9	6	8.1	30211	49	1550	15	0.97	0.25	18|634|947|1906|2161|3818|5054|5055|5156|5270|5328|10019|84830|114897|222537	ABAT|CEACAM1|CD34|EDN1|F12|KLKB1|SERPINE1|SERPINB2|PDGFRA|SERPINE2|PLAU|SH2B3|ADTRP|C1QTNF1|HS3ST5	-6.1	MyList
WikiPathways	27	WP4341	Non-genomic actions of 1,25 dihydroxyvitamin D3		-7.9	4.9	7.7	30211	71	1550	18	1.2	0.27	1594|2113|3569|3576|4790|4791|4939|5330|5971|6347|6772|6773|7124|7421|9636|10964|23236|91543	CYP27B1|ETS1|IL6|CXCL8|NFKB1|NFKB2|OAS2|PLCB2|RELB|CCL2|STAT1|STAT2|TNF|VDR|ISG15|IFI44L|PLCB1|RSAD2	-6.1	MyList
GO Biological Processes	19	GO:0071496	cellular response to external stimulus	19_GO:0050896 response to stimulus	-7.9	2.7	6.7	30211	301	1550	41	2.6	0.41	360|467|490|834|1647|2308|3309|3428|3553|3659|4023|4067|4217|4615|4654|4790|5563|5610|5734|5743|5788|6506|6513|6662|7098|7378|7412|7421|7494|7942|8795|27063|51284|54407|80149|81788|84879|90226|93649|154743|168620	AQP3|ATF3|ATP2B1|CASP1|GADD45A|FOXO1|HSPA5|IFI16|IL1B|IRF1|LPL|LYN|MAP3K5|MYD88|MYOD1|NFKB1|PRKAA2|EIF2AK2|PTGER4|PTGS2|PTPRC|SLC1A2|SLC2A1|SOX9|TLR3|UPP1|VCAM1|VDR|XBP1|TFEB|TNFRSF10B|ANKRD1|TLR7|SLC38A2|ZC3H12A|NUAK2|MFSD2A|UCN2|MYOCD|BMT2|BHLHA15	-6.1	MyList
GO Biological Processes	19	GO:0120039	plasma membrane bounded cell projection morphogenesis	19_GO:0032502 developmental process	-7.9	2.3	6.5	30211	459	1550	54	3.5	0.47	25|135|627|885|1906|1942|1948|1952|2044|2049|2050|2115|2637|2668|2736|2823|3672|3798|3909|3911|3918|4130|4803|4891|4917|5364|5800|6091|6608|7422|7474|7477|7869|8577|8828|9890|10458|10512|22865|22891|22903|23129|26050|54538|56956|57463|57715|57731|64218|65078|80128|114798|139065|223117	ABL1|ADORA2A|BDNF|CCK|EDN1|EFNA1|EFNB2|CELSR2|EPHA5|EPHB3|EPHB4|ETV1|GBX2|GDNF|GLI2|GPM6A|ITGA1|KIF5A|LAMA3|LAMA5|LAMC2|MAP1A|NGF|SLC11A2|NTN3|PLXNB1|PTPRO|ROBO1|SMO|VEGFA|WNT5A|WNT7B|SEMA3B|TMEFF1|NRP2|PLPPR4|BAIAP2|SEMA3C|SLITRK3|ZNF365|BTBD3|PLXND1|SLITRK5|ROBO4|LHX9|AMIGO1|SEMA4G|SPTBN4|SEMA4A|RTN4R|TRIM46|SLITRK1|SLITRK4|SEMA3D	-6.1	MyList
GO Biological Processes	19	GO:0001763	morphogenesis of a branching structure	19_GO:0032502 developmental process	-7.9	3.3	7	30211	171	1550	29	1.9	0.34	133|367|374|639|652|1435|1906|2247|2252|2637|2668|2736|3202|3911|4323|4824|5087|5371|6662|7421|7422|7474|7855|9021|10512|23129|54567|84870|157506	ADM|AR|AREG|PRDM1|BMP4|CSF1|EDN1|FGF2|FGF7|GBX2|GDNF|GLI2|HOXA5|LAMA5|MMP14|NKX3-1|PBX1|PML|SOX9|VDR|VEGFA|WNT5A|FZD5|SOCS3|SEMA3C|PLXND1|DLL4|RSPO3|RDH10	-6.1	MyList
GO Biological Processes	19	GO:1903530	regulation of secretion by cell	19_GO:0051179 localization	-7.9	2.2	6.4	30211	549	1550	61	3.9	0.49	18|134|135|634|668|783|1080|1588|1906|2044|2149|2624|2668|2697|2852|3091|3134|3351|3552|3553|3569|3589|3592|3598|3623|3624|3965|3976|4067|4824|5021|5208|5468|5874|6288|6352|6447|6623|7043|7124|7133|7424|7779|8111|8564|8912|9536|10802|22999|25837|27063|28984|50855|51738|79651|80223|84830|90007|91543|112755|114897	ABAT|ADORA1|ADORA2A|CEACAM1|FOXL2|CACNB2|CFTR|CYP19A1|EDN1|EPHA5|F2R|GATA2|GDNF|GJA1|GPER1|HIF1A|HLA-F|HTR1B|IL1A|IL1B|IL6|IL11|IL12A|IL13RA2|INHA|INHBA|LGALS9|LIF|LYN|NKX3-1|OXTR|PFKFB2|PPARG|RAB27B|SAA1|CCL5|SCG5|SNCG|TGFB3|TNF|TNFRSF1B|VEGFC|SLC30A1|GPR68|KMO|CACNA1H|PTGES|SEC24A|RIMS1|RAB26|ANKRD1|RGCC|PARD6A|GHRL|RHBDF2|RAB11FIP1|ADTRP|MIDN|RSAD2|STX1B|C1QTNF1	-6.1	MyList
GO Biological Processes	19	GO:0050767	regulation of neurogenesis	19_GO:0032502 developmental process	-7.9	2.5	6.6	30211	361	1550	46	3	0.43	627|2670|2852|3091|3397|3398|3553|3569|3815|3976|4067|4155|4803|5270|5364|6091|6474|6604|6608|7124|7133|7422|7424|7474|7869|9283|10458|10512|10636|22891|23129|23462|28514|54567|57463|57715|64218|65078|79365|80128|80237|84630|114798|146433|223117|407006	BDNF|GFAP|GPER1|HIF1A|ID1|ID2|IL1B|IL6|KIT|LIF|LYN|MBP|NGF|SERPINE2|PLXNB1|ROBO1|SHOX2|SMARCD3|SMO|TNF|TNFRSF1B|VEGFA|VEGFC|WNT5A|SEMA3B|GPR37L1|BAIAP2|SEMA3C|RGS14|ZNF365|PLXND1|HEY1|DLL1|DLL4|AMIGO1|SEMA4G|SEMA4A|RTN4R|BHLHE41|TRIM46|ELL3|TTBK1|SLITRK1|IL34|SEMA3D|MIR221	-6	MyList
GO Biological Processes	19	GO:0046634	regulation of alpha-beta T cell activation	19_GO:0002376 immune system process	-7.8	4.1	7.4	30211	105	1550	22	1.4	0.3	135|639|861|868|3133|3142|3592|3594|3659|3718|3965|5788|7292|8767|9308|10148|26191|29126|64115|64332|80149|114548	ADORA2A|PRDM1|RUNX1|CBLB|HLA-E|HLX|IL12A|IL12RB1|IRF1|JAK3|LGALS9|PTPRC|TNFSF4|RIPK2|CD83|EBI3|PTPN22|CD274|VSIR|NFKBIZ|ZC3H12A|NLRP3	-6	MyList
GO Biological Processes	19	GO:0033674	positive regulation of kinase activity	19_GO:0048518 positive regulation of biological process	-7.8	2.3	6.5	30211	473	1550	55	3.5	0.47	25|134|374|685|972|1116|1435|1839|1906|1942|2044|2049|2050|2065|2069|2081|2247|2321|3084|3357|3481|3553|3815|4067|4217|4515|4683|4739|5156|5208|5606|5788|6091|6352|7098|7124|7422|7424|7474|7855|8091|8795|9052|10333|22943|28984|29775|50507|51704|51738|56892|84254|84630|146433|148932	ABL1|ADORA1|AREG|BTC|CD74|CHI3L1|CSF1|HBEGF|EDN1|EFNA1|EPHA5|EPHB3|EPHB4|ERBB3|EREG|ERN1|FGF2|FLT1|NRG1|HTR2B|IGF2|IL1B|KIT|LYN|MAP3K5|MTCP1|NBN|NEDD9|PDGFRA|PFKFB2|MAP2K3|PTPRC|ROBO1|CCL5|TLR3|TNF|VEGFA|VEGFC|WNT5A|FZD5|HMGA2|TNFRSF10B|GPRC5A|TLR6|DKK1|RGCC|CARD10|NOX4|GPRC5B|GHRL|TCIM|CAMKK1|TTBK1|IL34|MOB3C	-6	MyList
GO Biological Processes	19	GO:0061138	morphogenesis of a branching epithelium	19_GO:0032502 developmental process	-7.8	3.4	7	30211	162	1550	28	1.8	0.34	133|367|374|652|1435|1906|2247|2252|2637|2668|2736|3202|3911|4323|4824|5087|5371|6662|7421|7422|7474|7855|9021|10512|23129|54567|84870|157506	ADM|AR|AREG|BMP4|CSF1|EDN1|FGF2|FGF7|GBX2|GDNF|GLI2|HOXA5|LAMA5|MMP14|NKX3-1|PBX1|PML|SOX9|VDR|VEGFA|WNT5A|FZD5|SOCS3|SEMA3C|PLXND1|DLL4|RSPO3|RDH10	-6	MyList
GO Biological Processes	19	GO:0001961	positive regulation of cytokine-mediated signaling pathway	19_GO:0023052 signaling	-7.8	5.5	7.9	30211	57	1550	16	1	0.26	834|837|972|1435|1906|3091|3574|3665|4321|7474|8767|9641|54625|81030|83666|117854	CASP1|CASP4|CD74|CSF1|EDN1|HIF1A|IL7|IRF7|MMP12|WNT5A|RIPK2|IKBKE|PARP14|ZBP1|PARP9|TRIM6	-6	MyList
GO Biological Processes	19	GO:0097530	granulocyte migration	19_GO:0040011 locomotion	-7.8	4.2	7.4	30211	97	1550	21	1.4	0.29	2207|2919|2920|2921|3553|3576|3627|3672|5142|5293|6288|6347|6348|6351|6352|6354|6355|6364|6372|6373|6374	FCER1G|CXCL1|CXCL2|CXCL3|IL1B|CXCL8|CXCL10|ITGA1|PDE4B|PIK3CD|SAA1|CCL2|CCL3|CCL4|CCL5|CCL7|CCL8|CCL20|CXCL6|CXCL11|CXCL5	-6	MyList
GO Biological Processes	19	GO:0007204	positive regulation of cytosolic calcium ion concentration	19_GO:0065007 biological regulation	-7.8	2.7	6.7	30211	281	1550	39	2.5	0.4	25|133|146|623|624|719|783|784|825|859|1901|1903|1906|2149|2151|2247|2624|2769|2852|3357|3627|3709|3718|4987|5021|5026|5156|5732|5734|5739|5788|6288|6348|6373|7225|8989|51554|51738|114897	ABL1|ADM|ADRA1D|BDKRB1|BDKRB2|C3AR1|CACNB2|CACNB3|CAPN3|CAV3|S1PR1|S1PR3|EDN1|F2R|F2RL2|FGF2|GATA2|GNA15|GPER1|HTR2B|CXCL10|ITPR2|JAK3|OPRL1|OXTR|P2RX5|PDGFRA|PTGER2|PTGER4|PTGIR|PTPRC|SAA1|CCL3|CXCL11|TRPC6|TRPA1|ACKR4|GHRL|C1QTNF1	-6	MyList
GO Biological Processes	19	GO:1903707	negative regulation of hemopoiesis	19_GO:0002376 immune system process	-7.8	4	7.3	30211	106	1550	22	1.4	0.3	634|652|861|972|2624|3142|3204|3398|3623|3624|3659|3718|3902|4067|6348|7098|7130|7292|8111|80149|282618|407006	CEACAM1|BMP4|RUNX1|CD74|GATA2|HLX|HOXA7|ID2|INHA|INHBA|IRF1|JAK3|LAG3|LYN|CCL3|TLR3|TNFAIP6|TNFSF4|GPR68|ZC3H12A|IFNL1|MIR221	-6	MyList
GO Biological Processes	19	GO:0048858	cell projection morphogenesis	19_GO:0032502 developmental process	-7.7	2.3	6.4	30211	463	1550	54	3.5	0.47	25|135|627|885|1906|1942|1948|1952|2044|2049|2050|2115|2637|2668|2736|2823|3672|3798|3909|3911|3918|4130|4803|4891|4917|5364|5800|6091|6608|7422|7474|7477|7869|8577|8828|9890|10458|10512|22865|22891|22903|23129|26050|54538|56956|57463|57715|57731|64218|65078|80128|114798|139065|223117	ABL1|ADORA2A|BDNF|CCK|EDN1|EFNA1|EFNB2|CELSR2|EPHA5|EPHB3|EPHB4|ETV1|GBX2|GDNF|GLI2|GPM6A|ITGA1|KIF5A|LAMA3|LAMA5|LAMC2|MAP1A|NGF|SLC11A2|NTN3|PLXNB1|PTPRO|ROBO1|SMO|VEGFA|WNT5A|WNT7B|SEMA3B|TMEFF1|NRP2|PLPPR4|BAIAP2|SEMA3C|SLITRK3|ZNF365|BTBD3|PLXND1|SLITRK5|ROBO4|LHX9|AMIGO1|SEMA4G|SPTBN4|SEMA4A|RTN4R|TRIM46|SLITRK1|SLITRK4|SEMA3D	-5.9	MyList
Canonical Pathways	11	M196	PID IL23 PATHWAY		-7.7	6.8	8.3	30211	37	1550	13	0.84	0.23	2919|3553|3569|3594|4790|4792|6347|6772|6775|6776|7124|9021|11009	CXCL1|IL1B|IL6|IL12RB1|NFKB1|NFKBIA|CCL2|STAT1|STAT4|STAT5A|TNF|SOCS3|IL24	-5.9	MyList
KEGG Pathway	24	hsa04010	MAPK signaling pathway		-7.7	2.7	6.6	30211	294	1550	40	2.6	0.4	374|627|783|784|1326|1435|1647|1846|1850|1942|2065|2069|2247|2252|2321|2323|3306|3481|3552|3553|3815|4217|4615|4790|4791|4803|5156|5533|5606|5971|6195|7043|7124|7422|7424|8605|8912|10235|27006|100137049	AREG|BDNF|CACNB2|CACNB3|MAP3K8|CSF1|GADD45A|DUSP4|DUSP8|EFNA1|ERBB3|EREG|FGF2|FGF7|FLT1|FLT3LG|HSPA2|IGF2|IL1A|IL1B|KIT|MAP3K5|MYD88|NFKB1|NFKB2|NGF|PDGFRA|PPP3CC|MAP2K3|RELB|RPS6KA1|TGFB3|TNF|VEGFA|VEGFC|PLA2G4C|CACNA1H|RASGRP2|FGF22|PLA2G4B	-5.9	MyList
WikiPathways	27	WP3888	VEGFA-VEGFR2 signaling pathway		-7.7	2.3	6.4	30211	439	1550	52	3.4	0.46	25|32|357|1827|1839|1901|2081|2113|2308|2321|2624|2697|3142|3383|3576|4189|4217|4319|4323|4343|4790|4792|5328|5329|5563|5606|5743|6347|6648|6772|7422|8013|8718|8828|8974|9079|9659|9709|9734|10014|10397|10628|22943|29109|50507|54567|57381|91010|154796|399726|445815|100506658	ABL1|ACACB|SHROOM2|RCAN1|HBEGF|S1PR1|ERN1|ETS1|FOXO1|FLT1|GATA2|GJA1|HLX|ICAM1|CXCL8|DNAJB9|MAP3K5|MMP10|MMP14|MOV10|NFKB1|NFKBIA|PLAU|PLAUR|PRKAA2|MAP2K3|PTGS2|CCL2|SOD2|STAT1|VEGFA|NR4A3|TNFRSF25|NRP2|P4HA2|LDB2|PDE4DIP|HERPUD1|HDAC9|HDAC5|NDRG1|TXNIP|DKK1|FHOD1|NOX4|DLL4|RHOJ|FMNL3|AMOT|MIR1915HG|PALM2AKAP2|OCLN	-5.9	MyList
GO Biological Processes	19	GO:0014032	neural crest cell development	19_GO:0032502 developmental process	-7.7	4.6	7.5	30211	81	1550	19	1.2	0.28	1000|1906|2637|2668|3084|3091|3357|3911|6591|6608|6662|7869|8828|9464|10512|57715|64218|157506|223117	CDH2|EDN1|GBX2|GDNF|NRG1|HIF1A|HTR2B|LAMA5|SNAI2|SMO|SOX9|SEMA3B|NRP2|HAND2|SEMA3C|SEMA4G|SEMA4A|RDH10|SEMA3D	-5.9	MyList
Reactome Gene Sets	6	R-HSA-109582	Hemostasis		-7.7	2.1	6.3	30211	621	1550	66	4.3	0.51	25|88|490|634|960|961|972|1607|2149|2151|2161|2207|2624|2769|2886|2977|3053|3309|3481|3655|3659|3660|3672|3674|3699|3709|3798|3818|4067|4312|4973|5026|5054|5055|5099|5136|5270|5271|5328|5329|5552|5739|5874|7043|7225|7277|7422|7424|7873|8356|8795|9127|9162|10019|10184|10235|10335|10603|10938|11343|23348|23539|23764|55582|55604|91768	ABL1|ACTN2|ATP2B1|CEACAM1|CD44|CD47|CD74|DGKB|F2R|F2RL2|F12|FCER1G|GATA2|GNA15|GRB7|GUCY1A2|SERPIND1|HSPA5|IGF2|ITGA6|IRF1|IRF2|ITGA1|ITGA2B|ITIH3|ITPR2|KIF5A|KLKB1|LYN|MMP1|OLR1|P2RX5|SERPINE1|SERPINB2|PCDH7|PDE1A|SERPINE2|SERPINB8|PLAU|PLAUR|SRGN|PTGIR|RAB27B|TGFB3|TRPC6|TUBA4A|VEGFA|VEGFC|MANF|H3C12|TNFRSF10B|P2RX6|DGKI|SH2B3|LHFPL2|RASGRP2|IRAG1|SH2B2|EHD1|MGLL|DOCK9|SLC16A8|MAFF|KIF27|CARMIL…	-5.9	MyList
GO Biological Processes	19	GO:0045936	negative regulation of phosphate metabolic process	19_GO:0048519 negative regulation of biological process	-7.7	2.3	6.4	30211	440	1550	52	3.4	0.46	25|103|135|341|623|624|634|652|859|868|1028|1647|3553|3623|3624|4067|5468|5783|5788|5794|5800|5997|7023|7026|7124|7128|7453|8613|9021|9052|10019|10636|22943|26191|27124|28951|50855|54541|54625|55022|79007|80149|84327|84930|90007|93649|116496|124790|145376|154043|374462|100506658	ABL1|ADAR|ADORA2A|APOC1|BDKRB1|BDKRB2|CEACAM1|BMP4|CAV3|CBLB|CDKN1C|GADD45A|IL1B|INHA|INHBA|LYN|PPARG|PTPN13|PTPRC|PTPRH|PTPRO|RGS2|TFAP4|NR2F2|TNF|TNFAIP3|WARS1|PLPP3|SOCS3|GPRC5A|SH2B3|RGS14|DKK1|PTPN22|INPP5J|TRIB2|PARD6A|DDIT4|PARP14|PID1|DBNDD1|ZC3H12A|ZBED3|MASTL|MIDN|MYOCD|NIBAN1|HEXIM2|PPP1R36|CNKSR3|PTPRQ|OCLN	-5.9	MyList
KEGG Pathway	24	hsa04151	PI3K-Akt signaling pathway		-7.7	2.5	6.5	30211	354	1550	45	2.9	0.43	374|627|1129|1435|1440|1942|2065|2069|2149|2247|2252|2321|2323|3371|3455|3481|3569|3574|3575|3655|3672|3674|3679|3695|3696|3718|3815|3909|3911|3914|3918|4515|4790|4803|5156|5293|5563|7422|7424|9180|9223|9586|9863|27006|54541	AREG|BDNF|CHRM2|CSF1|CSF3|EFNA1|ERBB3|EREG|F2R|FGF2|FGF7|FLT1|FLT3LG|TNC|IFNAR2|IGF2|IL6|IL7|IL7R|ITGA6|ITGA1|ITGA2B|ITGA7|ITGB7|ITGB8|JAK3|KIT|LAMA3|LAMA5|LAMB3|LAMC2|MTCP1|NFKB1|NGF|PDGFRA|PIK3CD|PRKAA2|VEGFA|VEGFC|OSMR|MAGI1|CREB5|MAGI2|FGF22|DDIT4	-5.9	MyList
GO Biological Processes	19	GO:0002224	toll-like receptor signaling pathway	19_GO:0002376 immune system process	-7.7	5.4	7.8	30211	58	1550	16	1	0.26	1520|3656|4067|4615|4792|4938|7098|7124|8767|9111|10318|10333|23180|51284|79931|81622	CTSS|IRAK2|LYN|MYD88|NFKBIA|OAS1|TLR3|TNF|RIPK2|NMI|TNIP1|TLR6|RFTN1|TLR7|TNIP3|UNC93B1	-5.9	MyList
GO Biological Processes	19	GO:0060322	head development	19_GO:0032502 developmental process	-7.6	1.9	6.2	30211	787	1550	78	5	0.56	18|25|220|357|490|652|999|1000|1901|1952|2009|2044|2049|2247|2624|2637|2735|2736|3084|3091|3309|3397|3398|3624|4155|4211|4323|5013|5021|5087|5156|5209|5270|5533|5916|5997|5999|6091|6506|6513|6608|6662|6751|6935|7026|7043|7360|7474|7477|8382|8828|9760|10409|10458|22891|22903|22943|23236|28514|54407|54510|54541|55130|55506|55553|55582|57463|64651|65009|65078|79625|79633|84630|84879|93986|116039|284…	ABAT|ABL1|ALDH1A3|SHROOM2|ATP2B1|BMP4|CDH1|CDH2|S1PR1|CELSR2|EML1|EPHA5|EPHB3|FGF2|GATA2|GBX2|GLI1|GLI2|NRG1|HIF1A|HSPA5|ID1|ID2|INHBA|MBP|MEIS1|MMP14|OTX1|OXTR|PBX1|PDGFRA|PFKFB3|SERPINE2|PPP3CC|RARG|RGS2|RGS4|ROBO1|SLC1A2|SLC2A1|SMO|SOX9|SSTR1|ZEB1|NR2F2|TGFB3|UGP2|WNT5A|WNT7B|NME5|NRP2|TOX|BASP1|BAIAP2|ZNF365|BTBD3|DKK1|PLCB1|DLL1|SLC38A2|PCDH18|DDIT4|ODAD2|MACROH2A2|SOX6|KIF27|AMIGO1|CSRNP1|N…	-5.8	MyList
GO Biological Processes	19	GO:0010563	negative regulation of phosphorus metabolic process	19_GO:0048519 negative regulation of biological process	-7.6	2.3	6.4	30211	441	1550	52	3.4	0.46	25|103|135|341|623|624|634|652|859|868|1028|1647|3553|3623|3624|4067|5468|5783|5788|5794|5800|5997|7023|7026|7124|7128|7453|8613|9021|9052|10019|10636|22943|26191|27124|28951|50855|54541|54625|55022|79007|80149|84327|84930|90007|93649|116496|124790|145376|154043|374462|100506658	ABL1|ADAR|ADORA2A|APOC1|BDKRB1|BDKRB2|CEACAM1|BMP4|CAV3|CBLB|CDKN1C|GADD45A|IL1B|INHA|INHBA|LYN|PPARG|PTPN13|PTPRC|PTPRH|PTPRO|RGS2|TFAP4|NR2F2|TNF|TNFAIP3|WARS1|PLPP3|SOCS3|GPRC5A|SH2B3|RGS14|DKK1|PTPN22|INPP5J|TRIB2|PARD6A|DDIT4|PARP14|PID1|DBNDD1|ZC3H12A|ZBED3|MASTL|MIDN|MYOCD|NIBAN1|HEXIM2|PPP1R36|CNKSR3|PTPRQ|OCLN	-5.8	MyList
WikiPathways	27	WP530	Cytokines and inflammatory response		-7.6	8.2	8.6	30211	26	1550	11	0.71	0.21	1435|1437|1440|2919|2920|3552|3553|3569|3574|3589|7124	CSF1|CSF2|CSF3|CXCL1|CXCL2|IL1A|IL1B|IL6|IL7|IL11|TNF	-5.8	MyList
GO Biological Processes	19	GO:0061564	axon development	19_GO:0032502 developmental process	-7.6	2.4	6.4	30211	380	1550	47	3	0.44	25|627|885|1906|1942|1948|2044|2049|2050|2115|2637|2668|2736|3798|3909|3911|3918|4130|4917|5364|5800|6091|6608|7422|7474|7869|8577|8828|9890|10458|10512|22865|23129|26050|27242|54538|56956|57463|57715|57731|64218|65078|80128|114798|139065|223117|349667	ABL1|BDNF|CCK|EDN1|EFNA1|EFNB2|EPHA5|EPHB3|EPHB4|ETV1|GBX2|GDNF|GLI2|KIF5A|LAMA3|LAMA5|LAMC2|MAP1A|NTN3|PLXNB1|PTPRO|ROBO1|SMO|VEGFA|WNT5A|SEMA3B|TMEFF1|NRP2|PLPPR4|BAIAP2|SEMA3C|SLITRK3|PLXND1|SLITRK5|TNFRSF21|ROBO4|LHX9|AMIGO1|SEMA4G|SPTBN4|SEMA4A|RTN4R|TRIM46|SLITRK1|SLITRK4|SEMA3D|RTN4RL2	-5.8	MyList
GO Biological Processes	19	GO:0050688	regulation of defense response to virus	19_GO:0044419 biological process involved in interspecies interaction between organisms	-7.6	4.7	7.5	30211	74	1550	18	1.2	0.27	3434|3553|3594|4321|6772|7128|9447|10475|23586|26191|51191|60489|79132|80149|83666|117854|151636|200316	IFIT1|IL1B|IL12RB1|MMP12|STAT1|TNFAIP3|AIM2|TRIM38|DDX58|PTPN22|HERC5|APOBEC3G|DHX58|ZC3H12A|PARP9|TRIM6|DTX3L|APOBEC3F	-5.8	MyList
GO Biological Processes	19	GO:0072001	renal system development	19_GO:0032502 developmental process	-7.6	2.6	6.5	30211	297	1550	40	2.6	0.4	231|445|639|652|947|1028|1948|2247|2668|2736|3037|3399|3764|3911|4774|4824|5087|5156|5800|6608|6662|6772|7422|7474|7477|9244|9863|10409|11277|23129|23371|26249|28514|28999|93649|116039|130497|157506|168667|282679	AKR1B1|ASS1|PRDM1|BMP4|CD34|CDKN1C|EFNB2|FGF2|GDNF|GLI2|HAS2|ID3|KCNJ8|LAMA5|NFIA|NKX3-1|PBX1|PDGFRA|PTPRO|SMO|SOX9|STAT1|VEGFA|WNT5A|WNT7B|CRLF1|MAGI2|BASP1|TREX1|PLXND1|TNS2|KLHL3|DLL1|KLF15|MYOCD|OSR2|OSR1|RDH10|BMPER|AQP11	-5.8	MyList
GO Biological Processes	19	GO:0031175	neuron projection development	19_GO:0032502 developmental process	-7.6	2	6.2	30211	639	1550	67	4.3	0.52	25|133|135|374|627|885|999|1906|1942|1948|1952|2044|2049|2050|2115|2637|2668|2670|2736|2823|3569|3672|3798|3909|3911|3918|4067|4130|4803|4891|4917|5357|5364|5800|6091|6608|7422|7474|7477|7869|7873|7940|8577|8828|9890|10458|10512|10938|22865|22891|22903|23129|26050|27242|51738|54538|56956|57463|57715|57731|64218|65078|80128|114798|139065|223117|349667	ABL1|ADM|ADORA2A|AREG|BDNF|CCK|CDH1|EDN1|EFNA1|EFNB2|CELSR2|EPHA5|EPHB3|EPHB4|ETV1|GBX2|GDNF|GFAP|GLI2|GPM6A|IL6|ITGA1|KIF5A|LAMA3|LAMA5|LAMC2|LYN|MAP1A|NGF|SLC11A2|NTN3|PLS1|PLXNB1|PTPRO|ROBO1|SMO|VEGFA|WNT5A|WNT7B|SEMA3B|MANF|LST1|TMEFF1|NRP2|PLPPR4|BAIAP2|SEMA3C|EHD1|SLITRK3|ZNF365|BTBD3|PLXND1|SLITRK5|TNFRSF21|GHRL|ROBO4|LHX9|AMIGO1|SEMA4G|SPTBN4|SEMA4A|RTN4R|TRIM46|SLITRK1|SLITRK4|SEMA3D|RTN…	-5.8	MyList
GO Biological Processes	19	GO:0060021	roof of mouth development	19_GO:0032502 developmental process	-7.6	4.3	7.3	30211	91	1550	20	1.3	0.29	2049|2295|2535|3624|3696|3714|4223|5156|6591|6615|7043|7474|9242|9249|9464|10194|64651|91461|116039|130497	EPHB3|FOXF2|FZD2|INHBA|ITGB8|JAG2|MEOX2|PDGFRA|SNAI2|SNAI1|TGFB3|WNT5A|MSC|DHRS3|HAND2|TSHZ1|CSRNP1|PKDCC|OSR2|OSR1	-5.8	MyList
Reactome Gene Sets	6	R-HSA-1280218	Adaptive Immune System		-7.5	1.9	6.1	30211	763	1550	76	4.9	0.55	718|868|947|972|999|1308|1326|1520|1759|3106|3112|3133|3134|3309|3383|3386|3695|3709|3798|3902|4008|4067|4615|4790|4792|4793|4794|5293|5641|5696|5698|5699|5721|5788|6737|6890|6891|6892|7277|7318|7412|8767|9021|9246|9554|10235|10324|10333|10384|10385|10437|10616|10802|11118|11119|11120|23308|26191|26249|26270|29121|29126|51191|51752|55008|55521|57520|64167|64750|80176|80380|114907|140691|151636|25…	C3|CBLB|CD34|CD74|CDH1|COL17A1|MAP3K8|CTSS|DNM1|HLA-B|HLA-DOB|HLA-E|HLA-F|HSPA5|ICAM1|ICAM4|ITGB7|ITPR2|KIF5A|LAG3|LMO7|LYN|MYD88|NFKB1|NFKBIA|NFKBIB|NFKBIE|PIK3CD|LGMN|PSMB8|PSMB9|PSMB10|PSME2|PTPRC|TRIM21|TAP1|TAP2|TAPBP|TUBA4A|UBA7|VCAM1|RIPK2|SOCS3|UBE2L6|SEC22B|RASGRP2|KLHL41|TLR6|BTN3A3|BTN2A2|IFI30|RBCK1|SEC24A|BTN3A2|BTN3A1|BTN2A1|ICOSLG|PTPN22|KLHL3|FBXO6|CLEC2D|CD274|HERC5|ERAP1|HERC6|T…	-5.8	MyList
GO Biological Processes	19	GO:1903555	regulation of tumor necrosis factor superfamily cytokine production	19_GO:0032501 multicellular organismal process	-7.5	3.1	6.8	30211	187	1550	30	1.9	0.35	947|961|3133|3552|3569|3965|4023|4615|4938|4939|4940|5788|6348|7098|7128|7474|7855|8767|11277|23586|26191|27086|27178|29126|51738|64115|64135|80149|90865|113277	CD34|CD47|HLA-E|IL1A|IL6|LGALS9|LPL|MYD88|OAS1|OAS2|OAS3|PTPRC|CCL3|TLR3|TNFAIP3|WNT5A|FZD5|RIPK2|TREX1|DDX58|PTPN22|FOXP1|IL37|CD274|GHRL|VSIR|IFIH1|ZC3H12A|IL33|TMEM106A	-5.8	MyList
Reactome Gene Sets	6	R-HSA-380108	Chemokine receptors bind chemokines		-7.5	5.3	7.7	30211	59	1550	16	1	0.26	2919|2920|2921|3576|3627|6347|6348|6351|6352|6354|6364|6372|6373|6374|51554|58191	CXCL1|CXCL2|CXCL3|CXCL8|CXCL10|CCL2|CCL3|CCL4|CCL5|CCL7|CCL20|CXCL6|CXCL11|CXCL5|ACKR4|CXCL16	-5.8	MyList
GO Biological Processes	19	GO:1901653	cellular response to peptide	19_GO:0050896 response to stimulus	-7.5	2.6	6.5	30211	298	1550	40	2.6	0.4	88|445|634|837|1583|1906|2308|2697|2852|3177|3383|3397|3481|3718|4067|4790|5468|5641|6772|6776|7124|7412|7494|8013|8767|8835|8837|9734|9882|10014|10333|10458|10603|23236|23516|26191|28999|51274|84709|114814	ACTN2|ASS1|CEACAM1|CASP4|CYP11A1|EDN1|FOXO1|GJA1|GPER1|SLC29A2|ICAM1|ID1|IGF2|JAK3|LYN|NFKB1|PPARG|LGMN|STAT1|STAT5A|TNF|VCAM1|XBP1|NR4A3|RIPK2|SOCS2|CFLAR|HDAC9|TBC1D4|HDAC5|TLR6|BAIAP2|SH2B2|PLCB1|SLC39A14|PTPN22|KLF15|KLF3|MGARP|GNRHR2	-5.8	MyList
GO Biological Processes	19	GO:0030195	negative regulation of blood coagulation	19_GO:0048519 negative regulation of biological process	-7.5	6.1	7.9	30211	45	1550	14	0.9	0.24	18|634|947|1906|2161|3818|5054|5055|5156|5270|5328|10019|84830|114897	ABAT|CEACAM1|CD34|EDN1|F12|KLKB1|SERPINE1|SERPINB2|PDGFRA|SERPINE2|PLAU|SH2B3|ADTRP|C1QTNF1	-5.7	MyList
GO Biological Processes	19	GO:0030099	myeloid cell differentiation	19_GO:0002376 immune system process	-7.5	2.9	6.6	30211	231	1550	34	2.2	0.37	103|652|861|1028|1435|1437|1440|2124|2624|3398|3428|3589|3623|3624|3696|3718|3726|3815|4067|4211|4286|4318|4891|5293|5371|5468|5971|7124|7422|10019|23218|27086|55509|116071	ADAR|BMP4|RUNX1|CDKN1C|CSF1|CSF2|CSF3|EVI2B|GATA2|ID2|IFI16|IL11|INHA|INHBA|ITGB8|JAK3|JUNB|KIT|LYN|MEIS1|MITF|MMP9|SLC11A2|PIK3CD|PML|PPARG|RELB|TNF|VEGFA|SH2B3|NBEAL2|FOXP1|BATF3|BATF2	-5.7	MyList
GO Biological Processes	19	GO:0030855	epithelial cell differentiation	19_GO:0032502 developmental process	-7.5	2.1	6.2	30211	549	1550	60	3.9	0.49	25|231|367|579|639|652|668|947|1000|1051|1901|1999|2069|2247|2535|2668|2683|2697|2735|3084|3091|3202|3215|3383|3398|3399|3552|3714|3880|4615|5357|5468|5800|5916|6608|6662|6781|7026|7357|7379|7422|7474|7477|9314|9863|10409|10628|23135|23424|23462|26084|26298|28514|28999|54538|55897|57619|64122|122786|345643	ABL1|AKR1B1|AR|NKX3-2|PRDM1|BMP4|FOXL2|CD34|CDH2|CEBPB|S1PR1|ELF3|EREG|FGF2|FZD2|GDNF|B4GALT1|GJA1|GLI1|NRG1|HIF1A|HOXA5|HOXB5|ICAM1|ID2|ID3|IL1A|JAG2|KRT19|MYD88|PLS1|PPARG|PTPRO|RARG|SMO|SOX9|STC1|NR2F2|UGCG|UPK2|VEGFA|WNT5A|WNT7B|KLF4|MAGI2|BASP1|TXNIP|KDM6B|TDRD7|HEY1|ARHGEF26|EHF|DLL1|KLF15|ROBO4|MESP1|SHROOM3|FN3K|FRMD6|MCIDAS	-5.7	MyList
GO Biological Processes	19	GO:0060761	negative regulation of response to cytokine stimulus	19_GO:0048519 negative regulation of biological process	-7.5	4.2	7.2	30211	92	1550	20	1.3	0.29	103|3569|4321|4938|4940|5468|5788|6091|6352|6773|9314|9636|10019|11274|11277|25939|54625|54726|114769|342979	ADAR|IL6|MMP12|OAS1|OAS3|PPARG|PTPRC|ROBO1|CCL5|STAT2|KLF4|ISG15|SH2B3|USP18|TREX1|SAMHD1|PARP14|OTUD4|CARD16|PALM3	-5.7	MyList
GO Biological Processes	19	GO:0022612	gland morphogenesis	19_GO:0032502 developmental process	-7.4	4.1	7.1	30211	101	1550	21	1.4	0.29	367|374|652|1051|1435|1999|2252|3371|3569|3911|4824|5371|5916|6195|6662|7043|7124|7421|7474|10512|23129	AR|AREG|BMP4|CEBPB|CSF1|ELF3|FGF7|TNC|IL6|LAMA5|NKX3-1|PML|RARG|RPS6KA1|SOX9|TGFB3|TNF|VDR|WNT5A|SEMA3C|PLXND1	-5.7	MyList
GO Biological Processes	19	GO:0030198	extracellular matrix organization	19_GO:0009987 cellular process	-7.4	2.7	6.5	30211	266	1550	37	2.4	0.39	1300|1308|1520|1999|2006|2295|2670|2683|3037|3038|3914|3936|4015|4060|4312|4314|4318|4319|4320|4321|4323|4791|4982|5156|5806|6662|7092|7124|25890|64116|79625|81621|81792|85301|89932|255631|285590	COL10A1|COL17A1|CTSS|ELF3|ELN|FOXF2|GFAP|B4GALT1|HAS2|HAS3|LAMB3|LCP1|LOX|LUM|MMP1|MMP3|MMP9|MMP10|MMP11|MMP12|MMP14|NFKB2|TNFRSF11B|PDGFRA|PTX3|SOX9|TLL1|TNF|ABI3BP|SLC39A8|NDNF|KAZALD1|ADAMTS12|COL27A1|PAPLN|COL24A1|SH3PXD2B	-5.7	MyList
GO Biological Processes	19	GO:0055123	digestive system development	19_GO:0032502 developmental process	-7.4	3.5	6.9	30211	139	1550	25	1.6	0.32	445|579|639|652|1028|2049|2295|2735|2736|3091|3142|3202|3398|3481|3576|3815|5021|5156|6474|6608|7043|7124|7474|91461|93649	ASS1|NKX3-2|PRDM1|BMP4|CDKN1C|EPHB3|FOXF2|GLI1|GLI2|HIF1A|HLX|HOXA5|ID2|IGF2|CXCL8|KIT|OXTR|PDGFRA|SHOX2|SMO|TGFB3|TNF|WNT5A|PKDCC|MYOCD	-5.6	MyList
KEGG Pathway	24	hsa05133	Pertussis		-7.4	4.6	7.3	30211	76	1550	18	1.2	0.27	715|716|717|718|834|840|3552|3553|3569|3576|3592|3659|4615|4790|6372|6374|7124|114548	C1R|C1S|C2|C3|CASP1|CASP7|IL1A|IL1B|IL6|CXCL8|IL12A|IRF1|MYD88|NFKB1|CXCL6|CXCL5|TNF|NLRP3	-5.6	MyList
GO Biological Processes	19	GO:0043062	extracellular structure organization	19_GO:0009987 cellular process	-7.4	2.7	6.5	30211	267	1550	37	2.4	0.39	1300|1308|1520|1999|2006|2295|2670|2683|3037|3038|3914|3936|4015|4060|4312|4314|4318|4319|4320|4321|4323|4791|4982|5156|5806|6662|7092|7124|25890|64116|79625|81621|81792|85301|89932|255631|285590	COL10A1|COL17A1|CTSS|ELF3|ELN|FOXF2|GFAP|B4GALT1|HAS2|HAS3|LAMB3|LCP1|LOX|LUM|MMP1|MMP3|MMP9|MMP10|MMP11|MMP12|MMP14|NFKB2|TNFRSF11B|PDGFRA|PTX3|SOX9|TLL1|TNF|ABI3BP|SLC39A8|NDNF|KAZALD1|ADAMTS12|COL27A1|PAPLN|COL24A1|SH3PXD2B	-5.6	MyList
GO Biological Processes	19	GO:1900047	negative regulation of hemostasis	19_GO:0048519 negative regulation of biological process	-7.4	5.9	7.8	30211	46	1550	14	0.9	0.24	18|634|947|1906|2161|3818|5054|5055|5156|5270|5328|10019|84830|114897	ABAT|CEACAM1|CD34|EDN1|F12|KLKB1|SERPINE1|SERPINB2|PDGFRA|SERPINE2|PLAU|SH2B3|ADTRP|C1QTNF1	-5.6	MyList
KEGG Pathway	24	hsa05146	Amoebiasis		-7.4	4	7.1	30211	102	1550	21	1.4	0.29	1437|2769|2919|2920|2921|3553|3569|3576|3592|3909|3911|3914|3918|4790|5293|5330|6318|7043|7124|23236|338382	CSF2|GNA15|CXCL1|CXCL2|CXCL3|IL1B|IL6|CXCL8|IL12A|LAMA3|LAMA5|LAMB3|LAMC2|NFKB1|PIK3CD|PLCB2|SERPINB4|TGFB3|TNF|PLCB1|RAB7B	-5.6	MyList
GO Biological Processes	19	GO:2001243	negative regulation of intrinsic apoptotic signaling pathway	19_GO:0023052 signaling	-7.4	4	7.1	30211	102	1550	21	1.4	0.29	624|637|960|972|3091|4318|4582|5329|5743|6591|6615|6648|7494|8382|8531|8876|9709|10017|10105|80237|219790	BDKRB2|BID|CD44|CD74|HIF1A|MMP9|MUC1|PLAUR|PTGS2|SNAI2|SNAI1|SOD2|XBP1|NME5|YBX3|VNN1|HERPUD1|BCL2L10|PPIF|ELL3|RTKN2	-5.6	MyList
GO Biological Processes	19	GO:1902106	negative regulation of leukocyte differentiation	19_GO:0002376 immune system process	-7.4	4	7.1	30211	102	1550	21	1.4	0.29	634|652|861|972|2624|3142|3204|3398|3623|3624|3659|3718|3902|4067|6348|7098|7130|7292|8111|80149|282618	CEACAM1|BMP4|RUNX1|CD74|GATA2|HLX|HOXA7|ID2|INHA|INHBA|IRF1|JAK3|LAG3|LYN|CCL3|TLR3|TNFAIP6|TNFSF4|GPR68|ZC3H12A|IFNL1	-5.6	MyList
GO Biological Processes	19	GO:0002833	positive regulation of response to biotic stimulus	19_GO:0048518 positive regulation of biological process	-7.4	3.1	6.7	30211	180	1550	29	1.9	0.34	661|2069|3133|3134|3428|3430|3592|3665|3902|4067|4321|5359|6352|7474|8638|9111|9447|9641|29126|55601|57169|79132|81030|83666|85363|115362|117854|338322|730249	POLR3D|EREG|HLA-E|HLA-F|IFI16|IFI35|IL12A|IRF7|LAG3|LYN|MMP12|PLSCR1|CCL5|WNT5A|OASL|NMI|AIM2|IKBKE|CD274|DDX60|ZNFX1|DHX58|ZBP1|PARP9|TRIM5|GBP5|TRIM6|NLRP10|ACOD1	-5.6	MyList
GO Biological Processes	19	GO:0097190	apoptotic signaling pathway	19_GO:0023052 signaling	-7.3	2.7	6.5	30211	268	1550	37	2.4	0.39	25|134|597|637|834|837|843|1051|2065|2081|2537|3428|3552|3553|3592|3624|3875|4217|4683|4803|5163|5371|6326|6648|7098|7124|7133|8718|8795|8837|9641|10017|27141|50486|54541|55075|60401	ABL1|ADORA1|BCL2A1|BID|CASP1|CASP4|CASP10|CEBPB|ERBB3|ERN1|IFI6|IFI16|IL1A|IL1B|IL12A|INHBA|KRT18|MAP3K5|NBN|NGF|PDK1|PML|SCN2A|SOD2|TLR3|TNF|TNFRSF1B|TNFRSF25|TNFRSF10B|CFLAR|IKBKE|BCL2L10|CIDEB|G0S2|DDIT4|UACA|EDA2R	-5.6	MyList
KEGG Pathway	24	hsa04610	Complement and coagulation cascades		-7.3	4.4	7.2	30211	85	1550	19	1.2	0.28	623|624|629|715|716|717|718|719|1379|2149|2151|2161|3053|3075|3818|5054|5055|5328|5329	BDKRB1|BDKRB2|CFB|C1R|C1S|C2|C3|C3AR1|CR1L|F2R|F2RL2|F12|SERPIND1|CFH|KLKB1|SERPINE1|SERPINB2|PLAU|PLAUR	-5.6	MyList
GO Biological Processes	19	GO:0045229	external encapsulating structure organization	19_GO:0009987 cellular process	-7.3	2.7	6.4	30211	269	1550	37	2.4	0.39	1300|1308|1520|1999|2006|2295|2670|2683|3037|3038|3914|3936|4015|4060|4312|4314|4318|4319|4320|4321|4323|4791|4982|5156|5806|6662|7092|7124|25890|64116|79625|81621|81792|85301|89932|255631|285590	COL10A1|COL17A1|CTSS|ELF3|ELN|FOXF2|GFAP|B4GALT1|HAS2|HAS3|LAMB3|LCP1|LOX|LUM|MMP1|MMP3|MMP9|MMP10|MMP11|MMP12|MMP14|NFKB2|TNFRSF11B|PDGFRA|PTX3|SOX9|TLL1|TNF|ABI3BP|SLC39A8|NDNF|KAZALD1|ADAMTS12|COL27A1|PAPLN|COL24A1|SH3PXD2B	-5.5	MyList
GO Biological Processes	19	GO:0002690	positive regulation of leukocyte chemotaxis	19_GO:0040011 locomotion	-7.3	4.1	7.1	30211	94	1550	20	1.3	0.29	719|972|1435|1906|3569|3576|3592|3627|3965|5054|5641|6348|6351|6352|6354|7422|7424|7474|23604|146433	C3AR1|CD74|CSF1|EDN1|IL6|CXCL8|IL12A|CXCL10|LGALS9|SERPINE1|LGMN|CCL3|CCL4|CCL5|CCL7|VEGFA|VEGFC|WNT5A|DAPK2|IL34	-5.5	MyList
GO Biological Processes	19	GO:0002698	negative regulation of immune effector process	19_GO:0002376 immune system process	-7.3	3.8	7	30211	112	1550	22	1.4	0.3	196|634|684|961|1379|3106|3133|3134|3142|3575|3598|3718|3965|5788|6318|7043|7124|7292|56833|80149|259307|282618	AHR|CEACAM1|BST2|CD47|CR1L|HLA-B|HLA-E|HLA-F|HLX|IL7R|IL13RA2|JAK3|LGALS9|PTPRC|SERPINB4|TGFB3|TNF|TNFSF4|SLAMF8|ZC3H12A|IL4I1|IFNL1	-5.5	MyList
GO Biological Processes	19	GO:1905954	positive regulation of lipid localization	19_GO:0051179 localization	-7.3	3.8	7	30211	112	1550	22	1.4	0.3	19|21|32|718|1588|1906|3552|3553|4023|4790|4792|4824|5468|9536|9641|10347|10938|51703|51738|80149|80820|114897	ABCA1|ABCA3|ACACB|C3|CYP19A1|EDN1|IL1A|IL1B|LPL|NFKB1|NFKBIA|NKX3-1|PPARG|PTGES|IKBKE|ABCA7|EHD1|ACSL5|GHRL|ZC3H12A|EEPD1|C1QTNF1	-5.5	MyList
GO Biological Processes	19	GO:0071407	cellular response to organic cyclic compound	19_GO:0050896 response to stimulus	-7.3	2.2	6.1	30211	504	1550	56	3.6	0.47	15|25|196|367|445|490|652|840|999|1051|1080|1129|1906|2769|2852|3309|3351|3357|3397|3399|3434|3553|3624|3709|4654|4790|4824|5142|5743|6347|6348|6352|6506|6608|6751|6772|6781|7023|7098|7124|7421|8013|8837|9464|23236|23586|54464|54541|54762|55809|64135|80149|84709|84830|114907|730249	AANAT|ABL1|AHR|AR|ASS1|ATP2B1|BMP4|CASP7|CDH1|CEBPB|CFTR|CHRM2|EDN1|GNA15|GPER1|HSPA5|HTR1B|HTR2B|ID1|ID3|IFIT1|IL1B|INHBA|ITPR2|MYOD1|NFKB1|NKX3-1|PDE4B|PTGS2|CCL2|CCL3|CCL5|SLC1A2|SMO|SSTR1|STAT1|STC1|TFAP4|TLR3|TNF|VDR|NR4A3|CFLAR|HAND2|PLCB1|DDX58|XRN1|DDIT4|GRAMD1C|TRERF1|IFIH1|ZC3H12A|MGARP|ADTRP|FBXO32|ACOD1	-5.5	MyList
GO Biological Processes	19	GO:0002703	regulation of leukocyte mediated immunity	19_GO:0002376 immune system process	-7.3	2.8	6.5	30211	236	1550	34	2.2	0.37	196|634|684|718|1379|2624|3106|3133|3134|3383|3553|3569|3575|3592|3594|3598|3718|3815|3902|3965|4067|5788|6318|6372|7098|7124|7133|7292|7855|23586|91543|114548|200558|259307	AHR|CEACAM1|BST2|C3|CR1L|GATA2|HLA-B|HLA-E|HLA-F|ICAM1|IL1B|IL6|IL7R|IL12A|IL12RB1|IL13RA2|JAK3|KIT|LAG3|LGALS9|LYN|PTPRC|SERPINB4|CXCL6|TLR3|TNF|TNFRSF1B|TNFSF4|FZD5|DDX58|RSAD2|NLRP3|APLF|IL4I1	-5.5	MyList
GO Biological Processes	19	GO:0032680	regulation of tumor necrosis factor production	19_GO:0032501 multicellular organismal process	-7.3	3.1	6.6	30211	182	1550	29	1.9	0.34	947|961|3133|3552|3569|3965|4023|4615|4938|4939|4940|5788|6348|7098|7128|7474|7855|8767|11277|23586|26191|27086|27178|51738|64115|64135|80149|90865|113277	CD34|CD47|HLA-E|IL1A|IL6|LGALS9|LPL|MYD88|OAS1|OAS2|OAS3|PTPRC|CCL3|TLR3|TNFAIP3|WNT5A|FZD5|RIPK2|TREX1|DDX58|PTPN22|FOXP1|IL37|GHRL|VSIR|IFIH1|ZC3H12A|IL33|TMEM106A	-5.5	MyList
GO Biological Processes	19	GO:0014031	mesenchymal cell development	19_GO:0032502 developmental process	-7.2	4.3	7.1	30211	86	1550	19	1.2	0.28	1000|1906|2637|2668|3084|3091|3357|3911|6591|6608|6662|7869|8828|9464|10512|57715|64218|157506|223117	CDH2|EDN1|GBX2|GDNF|NRG1|HIF1A|HTR2B|LAMA5|SNAI2|SMO|SOX9|SEMA3B|NRP2|HAND2|SEMA3C|SEMA4G|SEMA4A|RDH10|SEMA3D	-5.5	MyList
GO Biological Processes	19	GO:0002699	positive regulation of immune effector process	19_GO:0002376 immune system process	-7.2	2.8	6.4	30211	248	1550	35	2.3	0.38	718|972|2624|3106|3133|3134|3142|3553|3569|3592|3594|3598|3815|3902|3965|4067|4189|5788|7124|7292|7474|7494|7855|8013|8767|23586|26191|51704|55601|64332|79132|91543|114548|117854|144811	C3|CD74|GATA2|HLA-B|HLA-E|HLA-F|HLX|IL1B|IL6|IL12A|IL12RB1|IL13RA2|KIT|LAG3|LGALS9|LYN|DNAJB9|PTPRC|TNF|TNFSF4|WNT5A|XBP1|FZD5|NR4A3|RIPK2|DDX58|PTPN22|GPRC5B|DDX60|NFKBIZ|DHX58|RSAD2|NLRP3|TRIM6|LACC1	-5.5	MyList
GO Biological Processes	19	GO:0051347	positive regulation of transferase activity	19_GO:0065007 biological regulation	-7.2	2.1	6.1	30211	559	1550	60	3.9	0.49	25|134|374|685|972|1116|1435|1839|1906|1942|2044|2049|2050|2065|2069|2081|2247|2321|3084|3357|3481|3553|3815|4067|4217|4515|4683|4739|5156|5208|5606|5788|5920|6091|6352|7098|7124|7422|7424|7474|7855|8091|8795|9052|9314|10333|22943|28984|29775|50507|51704|51738|56892|57561|84254|84630|84930|146433|148932|151636	ABL1|ADORA1|AREG|BTC|CD74|CHI3L1|CSF1|HBEGF|EDN1|EFNA1|EPHA5|EPHB3|EPHB4|ERBB3|EREG|ERN1|FGF2|FLT1|NRG1|HTR2B|IGF2|IL1B|KIT|LYN|MAP3K5|MTCP1|NBN|NEDD9|PDGFRA|PFKFB2|MAP2K3|PTPRC|PLAAT4|ROBO1|CCL5|TLR3|TNF|VEGFA|VEGFC|WNT5A|FZD5|HMGA2|TNFRSF10B|GPRC5A|KLF4|TLR6|DKK1|RGCC|CARD10|NOX4|GPRC5B|GHRL|TCIM|ARRDC3|CAMKK1|TTBK1|MASTL|IL34|MOB3C|DTX3L	-5.5	MyList
GO Biological Processes	19	GO:0008217	regulation of blood pressure	19_GO:0032501 multicellular organismal process	-7.2	3.1	6.6	30211	183	1550	29	1.9	0.34	18|133|134|146|367|490|623|947|1359|1906|2149|2643|3398|4987|5021|5468|5743|5800|6648|7026|7124|7424|8862|9283|10699|28514|51752|64167|80852	ABAT|ADM|ADORA1|ADRA1D|AR|ATP2B1|BDKRB1|CD34|CPA3|EDN1|F2R|GCH1|ID2|OPRL1|OXTR|PPARG|PTGS2|PTPRO|SOD2|NR2F2|TNF|VEGFC|APLN|GPR37L1|CORIN|DLL1|ERAP1|ERAP2|GRIP2	-5.5	MyList
Canonical Pathways	11	M167	PID AP1 PATHWAY		-7.2	4.7	7.3	30211	70	1550	17	1.1	0.26	467|573|1437|1906|1997|2113|2624|2697|3091|3569|3576|3726|4312|4318|4502|5328|6347	ATF3|BAG1|CSF2|EDN1|ELF1|ETS1|GATA2|GJA1|HIF1A|IL6|CXCL8|JUNB|MMP1|MMP9|MT2A|PLAU|CCL2	-5.4	MyList
KEGG Pathway	24	hsa05167	Kaposi sarcoma-associated herpesvirus infection		-7.2	3	6.5	30211	194	1550	30	1.9	0.35	637|718|1437|1827|2247|2919|2920|2921|3091|3106|3133|3134|3383|3455|3569|3576|3665|3709|4067|4790|4792|5293|5533|5610|5743|6772|6773|7098|7422|9641	BID|C3|CSF2|RCAN1|FGF2|CXCL1|CXCL2|CXCL3|HIF1A|HLA-B|HLA-E|HLA-F|ICAM1|IFNAR2|IL6|CXCL8|IRF7|ITPR2|LYN|NFKB1|NFKBIA|PIK3CD|PPP3CC|EIF2AK2|PTGS2|STAT1|STAT2|TLR3|VEGFA|IKBKE	-5.4	MyList
GO Biological Processes	19	GO:0001960	negative regulation of cytokine-mediated signaling pathway	19_GO:0023052 signaling	-7.2	4.3	7.1	30211	87	1550	19	1.2	0.28	103|3569|4321|4938|4940|5468|5788|6091|6352|6773|9636|10019|11274|11277|25939|54625|54726|114769|342979	ADAR|IL6|MMP12|OAS1|OAS3|PPARG|PTPRC|ROBO1|CCL5|STAT2|ISG15|SH2B3|USP18|TREX1|SAMHD1|PARP14|OTUD4|CARD16|PALM3	-5.4	MyList
GO Biological Processes	19	GO:0045860	positive regulation of protein kinase activity	19_GO:0048518 positive regulation of biological process	-7.2	2.3	6.2	30211	393	1550	47	3	0.44	25|134|374|685|1116|1435|1839|1906|1942|2065|2069|2081|2247|2321|3084|3357|3481|3553|3815|4217|4515|4739|5606|5788|6091|6352|7098|7124|7422|7424|7474|7855|8091|8795|9052|10333|22943|28984|29775|50507|51704|51738|56892|84254|84630|146433|148932	ABL1|ADORA1|AREG|BTC|CHI3L1|CSF1|HBEGF|EDN1|EFNA1|ERBB3|EREG|ERN1|FGF2|FLT1|NRG1|HTR2B|IGF2|IL1B|KIT|MAP3K5|MTCP1|NEDD9|MAP2K3|PTPRC|ROBO1|CCL5|TLR3|TNF|VEGFA|VEGFC|WNT5A|FZD5|HMGA2|TNFRSF10B|GPRC5A|TLR6|DKK1|RGCC|CARD10|NOX4|GPRC5B|GHRL|TCIM|CAMKK1|TTBK1|IL34|MOB3C	-5.4	MyList
GO Biological Processes	19	GO:0003007	heart morphogenesis	19_GO:0032502 developmental process	-7.1	2.7	6.4	30211	250	1550	35	2.3	0.38	652|859|1901|1906|1942|2006|2050|2535|2697|3037|3084|3091|3357|6091|6474|6591|6604|6608|6615|6662|6911|7422|7474|8828|9249|9464|10512|11277|23129|23462|27063|28514|54567|55897|65009	BMP4|CAV3|S1PR1|EDN1|EFNA1|ELN|EPHB4|FZD2|GJA1|HAS2|NRG1|HIF1A|HTR2B|ROBO1|SHOX2|SNAI2|SMARCD3|SMO|SNAI1|SOX9|TBX6|VEGFA|WNT5A|NRP2|DHRS3|HAND2|SEMA3C|TREX1|PLXND1|HEY1|ANKRD1|DLL1|DLL4|MESP1|NDRG4	-5.4	MyList
GO Biological Processes	19	GO:0048589	developmental growth	19_GO:0040007 growth	-7.1	2.4	6.2	30211	369	1550	45	2.9	0.43	25|133|367|374|607|627|652|668|861|1028|1435|1588|1901|1906|2069|2252|2619|2697|2736|3202|4654|4683|4814|5806|5916|6506|6608|6662|6665|6781|7130|7474|7477|8828|8837|9863|23371|28514|55897|65009|85301|91461|114798|157506|389125	ABL1|ADM|AR|AREG|BCL9|BDNF|BMP4|FOXL2|RUNX1|CDKN1C|CSF1|CYP19A1|S1PR1|EDN1|EREG|FGF7|GAS1|GJA1|GLI2|HOXA5|MYOD1|NBN|NINJ1|PTX3|RARG|SLC1A2|SMO|SOX9|SOX15|STC1|TNFAIP6|WNT5A|WNT7B|NRP2|CFLAR|MAGI2|TNS2|DLL1|MESP1|NDRG4|COL27A1|PKDCC|SLITRK1|RDH10|MUSTN1	-5.4	MyList
GO Biological Processes	19	GO:0010817	regulation of hormone levels	19_GO:0065007 biological regulation	-7.1	2.2	6.1	30211	496	1550	55	3.5	0.47	15|18|133|134|216|220|231|668|1080|1359|1428|1583|1588|1594|1803|1906|2044|2697|2852|3091|3553|3569|3589|3623|3624|3976|4067|4160|4790|4824|5156|5208|5468|5959|6352|6447|6817|7124|8111|8528|8912|9249|10699|23516|28231|29785|51738|54760|80223|90007|114897|151056|157506|259307|283849	AANAT|ABAT|ADM|ADORA1|ALDH1A1|ALDH1A3|AKR1B1|FOXL2|CFTR|CPA3|CRYM|CYP11A1|CYP19A1|CYP27B1|DPP4|EDN1|EPHA5|GJA1|GPER1|HIF1A|IL1B|IL6|IL11|INHA|INHBA|LIF|LYN|MC4R|NFKB1|NKX3-1|PDGFRA|PFKFB2|PPARG|RDH5|CCL5|SCG5|SULT1A1|TNF|GPR68|DDO|CACNA1H|DHRS3|CORIN|SLC39A14|SLCO4A1|CYP2S1|GHRL|PCSK4|RAB11FIP1|MIDN|C1QTNF1|PLB1|RDH10|IL4I1|EXOC3L1	-5.4	MyList
GO Biological Processes	19	GO:0010634	positive regulation of epithelial cell migration	19_GO:0040011 locomotion	-7.1	3.1	6.6	30211	174	1550	28	1.8	0.34	25|652|1839|1906|2113|2247|2252|2624|3037|3091|4318|5293|5606|5641|5743|6662|6776|7422|7424|7474|8613|8828|9734|10769|27086|57381|80149|407006	ABL1|BMP4|HBEGF|EDN1|ETS1|FGF2|FGF7|GATA2|HAS2|HIF1A|MMP9|PIK3CD|MAP2K3|LGMN|PTGS2|SOX9|STAT5A|VEGFA|VEGFC|WNT5A|PLPP3|NRP2|HDAC9|PLK2|FOXP1|RHOJ|ZC3H12A|MIR221	-5.4	MyList
GO Biological Processes	19	GO:2000341	regulation of chemokine (C-X-C motif) ligand 2 production	19_GO:0032501 multicellular organismal process	-7.1	9.7	8.6	30211	18	1550	9	0.58	0.19	972|4023|4155|4615|4938|4940|7124|9314|27086	CD74|LPL|MBP|MYD88|OAS1|OAS3|TNF|KLF4|FOXP1	-5.4	MyList
WikiPathways	27	WP2848	Pluripotent stem cell differentiation pathway		-7.1	5.7	7.6	30211	48	1550	14	0.9	0.24	652|1435|2247|2323|3569|3589|3624|3815|7043|7422|7474|7477|8200|22943	BMP4|CSF1|FGF2|FLT3LG|IL6|IL11|INHBA|KIT|TGFB3|VEGFA|WNT5A|WNT7B|GDF5|DKK1	-5.4	MyList
GO Biological Processes	19	GO:0010720	positive regulation of cell development	19_GO:0032502 developmental process	-7.1	2.6	6.3	30211	297	1550	39	2.5	0.4	25|627|652|2670|2852|3037|3091|3398|3553|3569|3815|3976|4067|4654|4739|4803|5270|5364|6091|6474|6604|6608|7124|7133|7422|7424|8111|9294|10458|10636|22891|23129|55604|57463|80237|84630|114798|146433|407006	ABL1|BDNF|BMP4|GFAP|GPER1|HAS2|HIF1A|ID2|IL1B|IL6|KIT|LIF|LYN|MYOD1|NEDD9|NGF|SERPINE2|PLXNB1|ROBO1|SHOX2|SMARCD3|SMO|TNF|TNFRSF1B|VEGFA|VEGFC|GPR68|S1PR2|BAIAP2|RGS14|ZNF365|PLXND1|CARMIL1|AMIGO1|ELL3|TTBK1|SLITRK1|IL34|MIR221	-5.4	MyList
WikiPathways	27	WP2849	Hematopoietic stem cell differentiation		-7.1	5	7.3	30211	63	1550	16	1	0.26	861|947|1435|1437|1440|2624|3552|3553|3569|3663|3674|4005|4582|6776|23541|407006	RUNX1|CD34|CSF1|CSF2|CSF3|GATA2|IL1A|IL1B|IL6|IRF5|ITGA2B|LMO2|MUC1|STAT5A|SEC14L2|MIR221	-5.4	MyList
GO Biological Processes	19	GO:0040007	growth	19_GO:0040007 growth	-7.1	2.4	6.1	30211	371	1550	45	2.9	0.43	25|133|367|374|607|627|652|668|861|1028|1435|1588|1901|1906|2069|2252|2619|2697|2736|3202|4654|4683|4814|5806|5916|6506|6608|6662|6665|6781|7130|7474|7477|8828|8837|9863|23371|28514|55897|65009|85301|91461|114798|157506|389125	ABL1|ADM|AR|AREG|BCL9|BDNF|BMP4|FOXL2|RUNX1|CDKN1C|CSF1|CYP19A1|S1PR1|EDN1|EREG|FGF7|GAS1|GJA1|GLI2|HOXA5|MYOD1|NBN|NINJ1|PTX3|RARG|SLC1A2|SMO|SOX9|SOX15|STC1|TNFAIP6|WNT5A|WNT7B|NRP2|CFLAR|MAGI2|TNS2|DLL1|MESP1|NDRG4|COL27A1|PKDCC|SLITRK1|RDH10|MUSTN1	-5.3	MyList
GO Biological Processes	19	GO:0050868	negative regulation of T cell activation	19_GO:0022610 biological adhesion	-7	3.6	6.7	30211	125	1550	23	1.5	0.31	135|634|652|861|868|972|1051|3142|3620|3659|3718|3902|3965|7292|10385|26191|27242|29126|64115|80149|80380|259307|282618	ADORA2A|CEACAM1|BMP4|RUNX1|CBLB|CD74|CEBPB|HLX|IDO1|IRF1|JAK3|LAG3|LGALS9|TNFSF4|BTN2A2|PTPN22|TNFRSF21|CD274|VSIR|ZC3H12A|PDCD1LG2|IL4I1|IFNL1	-5.3	MyList
GO Biological Processes	19	GO:0043434	response to peptide hormone	19_GO:0050896 response to stimulus	-7	2.4	6.2	30211	347	1550	43	2.8	0.42	15|88|133|374|445|634|1583|1906|2069|2308|2852|3177|3481|3718|3795|4067|4160|4790|5021|5468|5743|6513|6772|6773|6775|6776|7352|7494|8013|8835|8837|9734|9882|10014|10458|10603|23236|23516|28999|84327|84709|87178|114814	AANAT|ACTN2|ADM|AREG|ASS1|CEACAM1|CYP11A1|EDN1|EREG|FOXO1|GPER1|SLC29A2|IGF2|JAK3|KHK|LYN|MC4R|NFKB1|OXTR|PPARG|PTGS2|SLC2A1|STAT1|STAT2|STAT4|STAT5A|UCP3|XBP1|NR4A3|SOCS2|CFLAR|HDAC9|TBC1D4|HDAC5|BAIAP2|SH2B2|PLCB1|SLC39A14|KLF15|ZBED3|MGARP|PNPT1|GNRHR2	-5.3	MyList
GO Biological Processes	19	GO:0033209	tumor necrosis factor-mediated signaling pathway	19_GO:0023052 signaling	-7	5.2	7.4	30211	56	1550	15	0.97	0.25	329|330|3875|4792|6772|7124|7133|7185|8718|8784|8995|9447|10673|55504|60401	BIRC2|BIRC3|KRT18|NFKBIA|STAT1|TNF|TNFRSF1B|TRAF1|TNFRSF25|TNFRSF18|TNFSF18|AIM2|TNFSF13B|TNFRSF19|EDA2R	-5.3	MyList
WikiPathways	27	WP5097	CCL18 signaling pathway		-7	5.2	7.4	30211	56	1550	15	0.97	0.25	205|467|960|999|1000|1437|3091|4318|6513|6615|6772|7412|7424|9839|100506603	AK4|ATF3|CD44|CDH1|CDH2|CSF2|HIF1A|MMP9|SLC2A1|SNAI1|STAT1|VCAM1|VEGFC|ZEB2|VASH1-AS1	-5.3	MyList
GO Biological Processes	19	GO:0071675	regulation of mononuclear cell migration	19_GO:0040011 locomotion	-7	3.7	6.8	30211	116	1550	22	1.4	0.3	719|961|1435|3592|3627|3965|4067|5054|5641|6347|6348|6351|6352|6354|6364|7124|7474|23236|56833|84830|146433|148823	C3AR1|CD47|CSF1|IL12A|CXCL10|LGALS9|LYN|SERPINE1|LGMN|CCL2|CCL3|CCL4|CCL5|CCL7|CCL20|TNF|WNT5A|PLCB1|SLAMF8|ADTRP|IL34|GCSAML	-5.3	MyList
GO Biological Processes	19	GO:0010035	response to inorganic substance	19_GO:0050896 response to stimulus	-7	2.1	6	30211	513	1550	56	3.6	0.47	15|18|25|360|374|445|825|999|1410|1437|1906|2081|2308|3091|3309|3552|3569|3726|3795|3815|4155|4217|4314|4318|4489|4493|4499|4501|4502|4891|4982|5359|5563|5641|5743|6648|6772|7128|7292|7352|7412|7474|7779|8837|8912|8989|10105|10235|10397|10628|11277|23135|23236|54407|54583|80149	AANAT|ABAT|ABL1|AQP3|AREG|ASS1|CAPN3|CDH1|CRYAB|CSF2|EDN1|ERN1|FOXO1|HIF1A|HSPA5|IL1A|IL6|JUNB|KHK|KIT|MBP|MAP3K5|MMP3|MMP9|MT1A|MT1E|MT1M|MT1X|MT2A|SLC11A2|TNFRSF11B|PLSCR1|PRKAA2|LGMN|PTGS2|SOD2|STAT1|TNFAIP3|TNFSF4|UCP3|VCAM1|WNT5A|SLC30A1|CFLAR|CACNA1H|TRPA1|PPIF|RASGRP2|NDRG1|TXNIP|TREX1|KDM6B|PLCB1|SLC38A2|EGLN1|ZC3H12A	-5.3	MyList
GO Biological Processes	19	GO:0090066	regulation of anatomical structure size	19_GO:0065007 biological regulation	-7	2.2	6	30211	487	1550	54	3.5	0.47	25|88|133|134|135|146|490|624|627|859|1440|1906|2006|2149|2643|2852|3351|3357|3575|3672|4803|5021|5357|5743|5916|5997|6648|7124|7422|7474|7477|7504|7869|10458|10512|10602|10723|11151|25802|51334|55604|55971|57715|57731|64218|65078|80128|80131|80206|80852|84561|146206|223117|282679	ABL1|ACTN2|ADM|ADORA1|ADORA2A|ADRA1D|ATP2B1|BDKRB2|BDNF|CAV3|CSF3|EDN1|ELN|F2R|GCH1|GPER1|HTR1B|HTR2B|IL7R|ITGA1|NGF|OXTR|PLS1|PTGS2|RARG|RGS2|SOD2|TNF|VEGFA|WNT5A|WNT7B|XK|SEMA3B|BAIAP2|SEMA3C|CDC42EP3|SLC12A7|CORO1A|LMOD1|PRR16|CARMIL1|BAIAP2L1|SEMA4G|SPTBN4|SEMA4A|RTN4R|TRIM46|LRRC8E|FHOD3|GRIP2|SLC12A8|CARMIL2|SEMA3D|AQP11	-5.3	MyList
GO Biological Processes	19	GO:0001822	kidney development	19_GO:0032502 developmental process	-7	2.6	6.2	30211	288	1550	38	2.5	0.39	231|445|639|652|947|1028|1948|2247|2668|2736|3037|3399|3764|3911|4824|5087|5156|5800|6608|6662|6772|7422|7474|7477|9244|9863|10409|11277|23129|23371|26249|28514|28999|116039|130497|157506|168667|282679	AKR1B1|ASS1|PRDM1|BMP4|CD34|CDKN1C|EFNB2|FGF2|GDNF|GLI2|HAS2|ID3|KCNJ8|LAMA5|NKX3-1|PBX1|PDGFRA|PTPRO|SMO|SOX9|STAT1|VEGFA|WNT5A|WNT7B|CRLF1|MAGI2|BASP1|TREX1|PLXND1|TNS2|KLHL3|DLL1|KLF15|OSR2|OSR1|RDH10|BMPER|AQP11	-5.3	MyList
GO Biological Processes	19	GO:0045444	fat cell differentiation	19_GO:0032502 developmental process	-7	3.8	6.8	30211	107	1550	21	1.4	0.29	1051|1052|2308|2869|3589|3914|5156|5468|5696|5743|5997|6591|8013|8091|9314|10124|23236|51316|51752|55908|283927	CEBPB|CEBPD|FOXO1|GRK5|IL11|LAMB3|PDGFRA|PPARG|PSMB8|PTGS2|RGS2|SNAI2|NR4A3|HMGA2|KLF4|ARL4A|PLCB1|PLAC8|ERAP1|ANGPTL8|NUDT7	-5.3	MyList
GO Biological Processes	19	GO:0070374	positive regulation of ERK1 and ERK2 cascade	19_GO:0023052 signaling	-7	2.8	6.4	30211	220	1550	32	2.1	0.36	25|652|960|972|1116|2149|2247|2852|3084|3357|3383|3552|3965|5156|5788|6347|6348|6351|6352|6354|6355|6364|7124|8767|8837|9464|10347|26191|50507|65009|168667|407006	ABL1|BMP4|CD44|CD74|CHI3L1|F2R|FGF2|GPER1|NRG1|HTR2B|ICAM1|IL1A|LGALS9|PDGFRA|PTPRC|CCL2|CCL3|CCL4|CCL5|CCL7|CCL8|CCL20|TNF|RIPK2|CFLAR|HAND2|ABCA7|PTPN22|NOX4|NDRG4|BMPER|MIR221	-5.3	MyList
GO Biological Processes	19	GO:0050679	positive regulation of epithelial cell proliferation	19_GO:0048518 positive regulation of biological process	-7	2.9	6.4	30211	209	1550	31	2	0.36	367|374|652|2247|2252|2301|2624|2683|3037|3091|3357|3397|3481|4321|5293|6608|6662|6776|7124|7128|7422|7424|7474|7494|8013|8828|8837|8862|51738|116039|130497	AR|AREG|BMP4|FGF2|FGF7|FOXE3|GATA2|B4GALT1|HAS2|HIF1A|HTR2B|ID1|IGF2|MMP12|PIK3CD|SMO|SOX9|STAT5A|TNF|TNFAIP3|VEGFA|VEGFC|WNT5A|XBP1|NR4A3|NRP2|CFLAR|APLN|GHRL|OSR2|OSR1	-5.3	MyList
GO Biological Processes	19	GO:0002761	regulation of myeloid leukocyte differentiation	19_GO:0002376 immune system process	-6.9	3.7	6.7	30211	117	1550	22	1.4	0.3	634|861|972|1051|1435|2124|2624|3204|3398|3623|3624|3665|3976|4067|4286|6348|7098|7124|7130|8111|27086|146433	CEACAM1|RUNX1|CD74|CEBPB|CSF1|EVI2B|GATA2|HOXA7|ID2|INHA|INHBA|IRF7|LIF|LYN|MITF|CCL3|TLR3|TNF|TNFAIP6|GPR68|FOXP1|IL34	-5.2	MyList
Reactome Gene Sets	6	R-HSA-168643	Nucleotide-binding domain, leucine rich repeat containing receptor (NLR) signaling pathways		-6.9	5.1	7.3	30211	57	1550	15	0.97	0.25	329|330|834|837|1540|3656|4790|4791|7128|8767|9447|10628|24145|114548|257397	BIRC2|BIRC3|CASP1|CASP4|CYLD|IRAK2|NFKB1|NFKB2|TNFAIP3|RIPK2|AIM2|TXNIP|PANX1|NLRP3|TAB3	-5.2	MyList
GO Biological Processes	19	GO:0071363	cellular response to growth factor stimulus	19_GO:0050896 response to stimulus	-6.9	2.2	6	30211	464	1550	52	3.4	0.46	25|627|652|960|1906|2081|2247|2252|2321|2591|2619|3037|3309|3397|3576|3696|4093|4803|5156|5293|5371|5468|5606|5641|6347|6352|6591|6662|6935|7043|7133|7412|7422|7424|7474|8200|8828|8837|9314|9404|9863|10458|10938|11151|27006|27063|54541|54567|55553|79625|81792|285704	ABL1|BDNF|BMP4|CD44|EDN1|ERN1|FGF2|FGF7|FLT1|GALNT3|GAS1|HAS2|HSPA5|ID1|CXCL8|ITGB8|SMAD9|NGF|PDGFRA|PIK3CD|PML|PPARG|MAP2K3|LGMN|CCL2|CCL5|SNAI2|SOX9|ZEB1|TGFB3|TNFRSF1B|VCAM1|VEGFA|VEGFC|WNT5A|GDF5|NRP2|CFLAR|KLF4|LPXN|MAGI2|BAIAP2|EHD1|CORO1A|FGF22|ANKRD1|DDIT4|DLL4|SOX6|NDNF|ADAMTS12|RGMB	-5.2	MyList
GO Biological Processes	19	GO:0002253	activation of immune response	19_GO:0002376 immune system process	-6.9	2.5	6.1	30211	326	1550	41	2.6	0.41	25|629|715|716|717|718|719|784|868|2207|3075|3428|4067|5142|5293|5788|7462|8013|8767|9447|9473|10384|10385|10603|10616|11118|11119|11120|11277|23149|23180|23308|26191|27242|28984|54718|57169|64332|80149|81030|85363	ABL1|CFB|C1R|C1S|C2|C3|C3AR1|CACNB3|CBLB|FCER1G|CFH|IFI16|LYN|PDE4B|PIK3CD|PTPRC|LAT2|NR4A3|RIPK2|AIM2|THEMIS2|BTN3A3|BTN2A2|SH2B2|RBCK1|BTN3A2|BTN3A1|BTN2A1|TREX1|FCHO1|RFTN1|ICOSLG|PTPN22|TNFRSF21|RGCC|BTN2A3P|ZNFX1|NFKBIZ|ZC3H12A|ZBP1|TRIM5	-5.2	MyList
GO Biological Processes	19	GO:0048565	digestive tract development	19_GO:0032502 developmental process	-6.9	3.5	6.6	30211	127	1550	23	1.5	0.31	445|579|639|652|2049|2295|2735|2736|3091|3142|3202|3398|3576|3815|5021|5156|6474|6608|7043|7124|7474|91461|93649	ASS1|NKX3-2|PRDM1|BMP4|EPHB3|FOXF2|GLI1|GLI2|HIF1A|HLX|HOXA5|ID2|CXCL8|KIT|OXTR|PDGFRA|SHOX2|SMO|TGFB3|TNF|WNT5A|PKDCC|MYOCD	-5.2	MyList
GO Biological Processes	19	GO:1990869	cellular response to chemokine	19_GO:0050896 response to stimulus	-6.9	4.1	6.9	30211	90	1550	19	1.2	0.28	2919|2920|2921|3576|3627|4015|6347|6348|6351|6352|6354|6355|6364|6372|6373|6374|10019|51554|80149	CXCL1|CXCL2|CXCL3|CXCL8|CXCL10|LOX|CCL2|CCL3|CCL4|CCL5|CCL7|CCL8|CCL20|CXCL6|CXCL11|CXCL5|SH2B3|ACKR4|ZC3H12A	-5.2	MyList
GO Biological Processes	19	GO:1990868	response to chemokine	19_GO:0050896 response to stimulus	-6.9	4.1	6.9	30211	90	1550	19	1.2	0.28	2919|2920|2921|3576|3627|4015|6347|6348|6351|6352|6354|6355|6364|6372|6373|6374|10019|51554|80149	CXCL1|CXCL2|CXCL3|CXCL8|CXCL10|LOX|CCL2|CCL3|CCL4|CCL5|CCL7|CCL8|CCL20|CXCL6|CXCL11|CXCL5|SH2B3|ACKR4|ZC3H12A	-5.2	MyList
GO Biological Processes	19	GO:0035458	cellular response to interferon-beta	19_GO:0050896 response to stimulus	-6.9	8.1	8.1	30211	24	1550	10	0.65	0.2	3428|3659|4938|6772|7098|9447|11277|87178|117854|730249	IFI16|IRF1|OAS1|STAT1|TLR3|AIM2|TREX1|PNPT1|TRIM6|ACOD1	-5.2	MyList
GO Biological Processes	19	GO:0030278	regulation of ossification	19_GO:0032501 multicellular organismal process	-6.9	3.6	6.7	30211	118	1550	22	1.4	0.3	490|652|1435|1594|1901|2697|3091|5087|5552|5734|6348|6662|7043|7474|9249|9636|22943|79412|91461|116039|130497|144347	ATP2B1|BMP4|CSF1|CYP27B1|S1PR1|GJA1|HIF1A|PBX1|SRGN|PTGER4|CCL3|SOX9|TGFB3|WNT5A|DHRS3|ISG15|DKK1|KREMEN2|PKDCC|OSR2|OSR1|RFLNA	-5.2	MyList
GO Biological Processes	19	GO:0110110	positive regulation of animal organ morphogenesis	19_GO:0032502 developmental process	-6.9	7.1	7.8	30211	30	1550	11	0.71	0.21	367|652|947|1435|1906|2247|2668|6662|7474|22943|55897	AR|BMP4|CD34|CSF1|EDN1|FGF2|GDNF|SOX9|WNT5A|DKK1|MESP1	-5.1	MyList
Reactome Gene Sets	6	R-HSA-168928	DDX58/IFIH1-mediated induction of interferon-alpha/beta		-6.9	4.3	6.9	30211	82	1550	18	1.2	0.27	843|1540|3665|4790|4791|4792|4793|6288|7128|7318|7706|9246|9636|9641|23586|51191|64135|79132	CASP10|CYLD|IRF7|NFKB1|NFKB2|NFKBIA|NFKBIB|SAA1|TNFAIP3|UBA7|TRIM25|UBE2L6|ISG15|IKBKE|DDX58|HERC5|IFIH1|DHX58	-5.1	MyList
KEGG Pathway	24	hsa05152	Tuberculosis		-6.8	3	6.4	30211	180	1550	28	1.8	0.34	637|718|843|972|1051|1263|1379|1520|1594|2207|3112|3460|3552|3553|3569|3592|3656|4615|4790|5533|6772|7043|7124|7421|8767|8844|10333|11151	BID|C3|CASP10|CD74|CEBPB|PLK3|CR1L|CTSS|CYP27B1|FCER1G|HLA-DOB|IFNGR2|IL1A|IL1B|IL6|IL12A|IRAK2|MYD88|NFKB1|PPP3CC|STAT1|TGFB3|TNF|VDR|RIPK2|KSR1|TLR6|CORO1A	-5.1	MyList
Reactome Gene Sets	6	R-HSA-9006934	Signaling by Receptor Tyrosine Kinases		-6.8	2.1	5.9	30211	521	1550	56	3.6	0.47	135|374|627|639|685|1759|1839|1846|2065|2069|2247|2252|2321|2323|2591|2670|2886|3084|3091|3397|3398|3399|3481|3709|3718|3726|3815|3909|3911|3914|3918|4067|4318|4664|4803|5156|5800|5900|6195|6236|6772|6776|7422|7424|8828|10019|10458|10603|10750|11033|26018|27006|29126|85301|143282|255631	ADORA2A|AREG|BDNF|PRDM1|BTC|DNM1|HBEGF|DUSP4|ERBB3|EREG|FGF2|FGF7|FLT1|FLT3LG|GALNT3|GFAP|GRB7|NRG1|HIF1A|ID1|ID2|ID3|IGF2|ITPR2|JAK3|JUNB|KIT|LAMA3|LAMA5|LAMB3|LAMC2|LYN|MMP9|NAB1|NGF|PDGFRA|PTPRO|RALGDS|RPS6KA1|RRAD|STAT1|STAT5A|VEGFA|VEGFC|NRP2|SH2B3|BAIAP2|SH2B2|GRAP|ADAP1|LRIG1|FGF22|CD274|COL27A1|FGFBP3|COL24A1	-5.1	MyList
GO Biological Processes	19	GO:0042509	regulation of tyrosine phosphorylation of STAT protein	19_GO:0023052 signaling	-6.8	4.2	6.8	30211	83	1550	18	1.2	0.27	1437|3569|3592|3815|3976|4067|6352|7124|8784|8995|9021|9244|10019|11009|54625|83666|282618|407006	CSF2|IL6|IL12A|KIT|LIF|LYN|CCL5|TNF|TNFRSF18|TNFSF18|SOCS3|CRLF1|SH2B3|IL24|PARP14|PARP9|IFNL1|MIR221	-5.1	MyList
Reactome Gene Sets	6	R-HSA-418594	G alpha (i) signalling events		-6.8	2.5	6.1	30211	318	1550	40	2.6	0.4	134|623|624|718|719|1129|1903|2769|2852|2919|2920|2921|3351|3576|3627|3709|4987|5136|5142|5330|5533|5999|6288|6351|6352|6364|6372|6373|6374|6751|8601|8786|8862|9283|9294|10636|23236|58191|84254|196883	ADORA1|BDKRB1|BDKRB2|C3|C3AR1|CHRM2|S1PR3|GNA15|GPER1|CXCL1|CXCL2|CXCL3|HTR1B|CXCL8|CXCL10|ITPR2|OPRL1|PDE1A|PDE4B|PLCB2|PPP3CC|RGS4|SAA1|CCL4|CCL5|CCL20|CXCL6|CXCL11|CXCL5|SSTR1|RGS20|RGS11|APLN|GPR37L1|S1PR2|RGS14|PLCB1|CXCL16|CAMKK1|ADCY4	-5.1	MyList
GO Biological Processes	19	GO:0042692	muscle cell differentiation	19_GO:0032502 developmental process	-6.8	2.6	6.1	30211	259	1550	35	2.3	0.38	88|133|607|652|825|859|1000|1827|3084|3481|3880|4015|4654|4814|5156|5239|6474|6604|6608|6662|7422|7504|8837|8912|10290|10324|23135|23462|25802|27063|50507|55897|80206|93649|284612	ACTN2|ADM|BCL9|BMP4|CAPN3|CAV3|CDH2|RCAN1|NRG1|IGF2|KRT19|LOX|MYOD1|NINJ1|PDGFRA|PGM5|SHOX2|SMARCD3|SMO|SOX9|VEGFA|XK|CFLAR|CACNA1H|SPEG|KLHL41|KDM6B|HEY1|LMOD1|ANKRD1|NOX4|MESP1|FHOD3|MYOCD|SYPL2	-5.1	MyList
GO Biological Processes	19	GO:0070167	regulation of biomineral tissue development	19_GO:0110148 biomineralization	-6.8	3.9	6.7	30211	101	1550	20	1.3	0.29	490|652|1051|1080|1594|1901|2697|3091|5552|6348|6662|7043|9636|23462|91461|116039|130497|144347|152816|401138	ATP2B1|BMP4|CEBPB|CFTR|CYP27B1|S1PR1|GJA1|HIF1A|SRGN|CCL3|SOX9|TGFB3|ISG15|HEY1|PKDCC|OSR2|OSR1|RFLNA|ODAPH|AMTN	-5.1	MyList
Canonical Pathways	11	M65	PID FRA PATHWAY		-6.7	6.3	7.5	30211	37	1550	12	0.77	0.22	1634|2697|3569|3576|3726|3909|3976|4312|4318|5328|5329|6347	DCN|GJA1|IL6|CXCL8|JUNB|LAMA3|LIF|MMP1|MMP9|PLAU|PLAUR|CCL2	-5	MyList
KEGG Pathway	24	hsa05165	Human papillomavirus infection		-6.7	2.4	6	30211	331	1550	41	2.6	0.41	2308|2535|3106|3133|3134|3371|3455|3655|3659|3672|3674|3679|3695|3696|3909|3911|3914|3918|4599|4600|4790|5293|5610|5734|5743|6772|6773|7098|7124|7422|7474|7477|7855|8638|9223|9586|9636|9641|23462|50855|55534	FOXO1|FZD2|HLA-B|HLA-E|HLA-F|TNC|IFNAR2|ITGA6|IRF1|ITGA1|ITGA2B|ITGA7|ITGB7|ITGB8|LAMA3|LAMA5|LAMB3|LAMC2|MX1|MX2|NFKB1|PIK3CD|EIF2AK2|PTGER4|PTGS2|STAT1|STAT2|TLR3|TNF|VEGFA|WNT5A|WNT7B|FZD5|OASL|MAGI1|CREB5|ISG15|IKBKE|HEY1|PARD6A|MAML3	-5	MyList
KEGG Pathway	24	hsa04062	Chemokine signaling pathway		-6.7	2.9	6.3	30211	192	1550	29	1.9	0.34	2869|2919|2920|2921|3576|3627|3718|4067|4790|4792|4793|5293|5330|6347|6348|6351|6352|6354|6355|6364|6372|6373|6374|6772|6773|10235|23236|58191|196883	GRK5|CXCL1|CXCL2|CXCL3|CXCL8|CXCL10|JAK3|LYN|NFKB1|NFKBIA|NFKBIB|PIK3CD|PLCB2|CCL2|CCL3|CCL4|CCL5|CCL7|CCL8|CCL20|CXCL6|CXCL11|CXCL5|STAT1|STAT2|RASGRP2|PLCB1|CXCL16|ADCY4	-5	MyList
GO Biological Processes	19	GO:0060562	epithelial tube morphogenesis	19_GO:0032502 developmental process	-6.7	2.5	6	30211	307	1550	39	2.5	0.4	25|133|367|374|652|1435|1906|1948|2247|2535|2637|2668|2697|2736|3091|3202|3911|4323|4824|5087|5371|5916|6608|6662|6911|7421|7422|7474|9464|23129|26249|28514|54567|55897|57619|65009|130497|144165|157506	ABL1|ADM|AR|AREG|BMP4|CSF1|EDN1|EFNB2|FGF2|FZD2|GBX2|GDNF|GJA1|GLI2|HIF1A|HOXA5|LAMA5|MMP14|NKX3-1|PBX1|PML|RARG|SMO|SOX9|TBX6|VDR|VEGFA|WNT5A|HAND2|PLXND1|KLHL3|DLL1|DLL4|MESP1|SHROOM3|NDRG4|OSR1|PRICKLE1|RDH10	-5	MyList
Reactome Gene Sets	6	R-HSA-983170	Antigen Presentation: Folding, assembly and peptide loading of class I MHC		-6.7	7.8	7.9	30211	25	1550	10	0.65	0.2	3106|3133|3134|3309|6890|6891|6892|10802|51752|64167	HLA-B|HLA-E|HLA-F|HSPA5|TAP1|TAP2|TAPBP|SEC24A|ERAP1|ERAP2	-5	MyList
WikiPathways	27	WP558	Complement and coagulation cascades		-6.7	5	7.1	30211	59	1550	15	0.97	0.25	623|629|715|716|717|718|719|2149|2161|3053|3075|3818|5054|5328|5329	BDKRB1|CFB|C1R|C1S|C2|C3|C3AR1|F2R|F12|SERPIND1|CFH|KLKB1|SERPINE1|PLAU|PLAUR	-5	MyList
GO Biological Processes	19	GO:0042531	positive regulation of tyrosine phosphorylation of STAT protein	19_GO:0023052 signaling	-6.7	4.7	7	30211	67	1550	16	1	0.26	1437|3569|3592|3815|3976|4067|6352|7124|8784|8995|9244|11009|54625|83666|282618|407006	CSF2|IL6|IL12A|KIT|LIF|LYN|CCL5|TNF|TNFRSF18|TNFSF18|CRLF1|IL24|PARP14|PARP9|IFNL1|MIR221	-5	MyList
GO Biological Processes	19	GO:0007423	sensory organ development	19_GO:0032502 developmental process	-6.7	2.1	5.8	30211	551	1550	58	3.7	0.48	220|357|490|579|639|652|668|1028|1052|1410|1906|2295|2301|2321|2535|2624|2637|2697|2823|3091|3198|3624|3714|3815|4211|4237|4286|5013|5087|5156|5205|5357|5916|6604|6662|6935|7043|7422|7474|7477|7855|8825|9314|9464|9890|10194|22882|23424|26018|28514|57381|84879|116039|130497|157506|168667|220202|285590	ALDH1A3|SHROOM2|ATP2B1|NKX3-2|PRDM1|BMP4|FOXL2|CDKN1C|CEBPD|CRYAB|EDN1|FOXF2|FOXE3|FLT1|FZD2|GATA2|GBX2|GJA1|GPM6A|HIF1A|HOXA1|INHBA|JAG2|KIT|MEIS1|MFAP2|MITF|OTX1|PBX1|PDGFRA|ATP8B1|PLS1|RARG|SMARCD3|SOX9|ZEB1|TGFB3|VEGFA|WNT5A|WNT7B|FZD5|LIN7A|KLF4|HAND2|PLPPR4|TSHZ1|ZHX2|TDRD7|LRIG1|DLL1|RHOJ|MFSD2A|OSR2|OSR1|RDH10|BMPER|ATOH7|SH3PXD2B	-5	MyList
WikiPathways	27	WP4304	Oligodendrocyte specification and differentiation, leading to myelin components for CNS		-6.7	6.9	7.7	30211	31	1550	11	0.71	0.21	652|2247|2736|2919|2920|3553|3976|4155|6662|7124|55553	BMP4|FGF2|GLI2|CXCL1|CXCL2|IL1B|LIF|MBP|SOX9|TNF|SOX6	-5	MyList
GO Biological Processes	19	GO:0002230	positive regulation of defense response to virus by host	19_GO:0044419 biological process involved in interspecies interaction between organisms	-6.7	6.9	7.7	30211	31	1550	11	0.71	0.21	3594|6772|9447|23586|26191|60489|80149|83666|117854|151636|200316	IL12RB1|STAT1|AIM2|DDX58|PTPN22|APOBEC3G|ZC3H12A|PARP9|TRIM6|DTX3L|APOBEC3F	-5	MyList
GO Biological Processes	19	GO:0019882	antigen processing and presentation	19_GO:0002376 immune system process	-6.7	4	6.7	30211	93	1550	19	1.2	0.28	972|1520|2207|3106|3112|3133|3134|3383|5641|5696|5971|6890|6891|6892|10437|11277|23180|51752|64167	CD74|CTSS|FCER1G|HLA-B|HLA-DOB|HLA-E|HLA-F|ICAM1|LGMN|PSMB8|RELB|TAP1|TAP2|TAPBP|IFI30|TREX1|RFTN1|ERAP1|ERAP2	-5	MyList
GO Biological Processes	19	GO:0014033	neural crest cell differentiation	19_GO:0032502 developmental process	-6.7	4	6.7	30211	93	1550	19	1.2	0.28	1000|1906|2637|2668|3084|3091|3357|3911|6591|6608|6662|7869|8828|9464|10512|57715|64218|157506|223117	CDH2|EDN1|GBX2|GDNF|NRG1|HIF1A|HTR2B|LAMA5|SNAI2|SMO|SOX9|SEMA3B|NRP2|HAND2|SEMA3C|SEMA4G|SEMA4A|RDH10|SEMA3D	-5	MyList
GO Biological Processes	19	GO:0043270	positive regulation of ion transport	19_GO:0051179 localization	-6.7	2.6	6.1	30211	273	1550	36	2.3	0.38	18|25|88|134|135|490|623|783|784|825|1051|1080|1520|1906|2149|2668|2852|3306|3460|3552|3553|3627|3718|5026|6347|6348|6351|6352|6373|6781|7225|8564|9536|9722|57463|154043	ABAT|ABL1|ACTN2|ADORA1|ADORA2A|ATP2B1|BDKRB1|CACNB2|CACNB3|CAPN3|CEBPB|CFTR|CTSS|EDN1|F2R|GDNF|GPER1|HSPA2|IFNGR2|IL1A|IL1B|CXCL10|JAK3|P2RX5|CCL2|CCL3|CCL4|CCL5|CXCL11|STC1|TRPC6|KMO|PTGES|NOS1AP|AMIGO1|CNKSR3	-5	MyList
GO Biological Processes	19	GO:0060538	skeletal muscle organ development	19_GO:0032502 developmental process	-6.7	3.4	6.5	30211	131	1550	23	1.5	0.31	445|467|607|668|1827|2006|3142|3235|3679|4223|4654|6608|7026|7504|8837|9242|10324|10409|10472|23764|27063|28514|59269	ASS1|ATF3|BCL9|FOXL2|RCAN1|ELN|HLX|HOXD9|ITGA7|MEOX2|MYOD1|SMO|NR2F2|XK|CFLAR|MSC|KLHL41|BASP1|ZBTB18|MAFF|ANKRD1|DLL1|HIVEP3	-5	MyList
GO Biological Processes	19	GO:0010595	positive regulation of endothelial cell migration	19_GO:0040011 locomotion	-6.7	3.4	6.5	30211	131	1550	23	1.5	0.31	25|652|1906|2113|2247|2624|3091|5293|5606|5641|5743|6776|7422|7424|7474|8613|8828|9734|10769|27086|57381|80149|407006	ABL1|BMP4|EDN1|ETS1|FGF2|GATA2|HIF1A|PIK3CD|MAP2K3|LGMN|PTGS2|STAT5A|VEGFA|VEGFC|WNT5A|PLPP3|NRP2|HDAC9|PLK2|FOXP1|RHOJ|ZC3H12A|MIR221	-5	MyList
GO Biological Processes	19	GO:0007411	axon guidance	19_GO:0040011 locomotion	-6.7	2.7	6.1	30211	227	1550	32	2.1	0.36	627|1906|1942|1948|2044|2049|2050|2115|2637|2668|2736|3798|3909|3911|3918|4917|5364|5800|6091|6608|7422|7474|7869|8577|8828|10512|23129|54538|56956|57715|64218|223117	BDNF|EDN1|EFNA1|EFNB2|EPHA5|EPHB3|EPHB4|ETV1|GBX2|GDNF|GLI2|KIF5A|LAMA3|LAMA5|LAMC2|NTN3|PLXNB1|PTPRO|ROBO1|SMO|VEGFA|WNT5A|SEMA3B|TMEFF1|NRP2|SEMA3C|PLXND1|ROBO4|LHX9|SEMA4G|SEMA4A|SEMA3D	-5	MyList
WikiPathways	27	WP3932	Focal adhesion: PI3K-Akt-mTOR-signaling pathway		-6.7	2.5	6	30211	309	1550	39	2.5	0.4	1129|1435|1440|1942|2149|2247|2252|2308|2321|3091|3371|3455|3575|3655|3674|3679|3695|3696|3718|3815|3909|3911|3914|3918|4803|5156|5208|5209|5210|5287|5293|5563|6513|7422|7424|9180|9586|27006|54541	CHRM2|CSF1|CSF3|EFNA1|F2R|FGF2|FGF7|FOXO1|FLT1|HIF1A|TNC|IFNAR2|IL7R|ITGA6|ITGA2B|ITGA7|ITGB7|ITGB8|JAK3|KIT|LAMA3|LAMA5|LAMB3|LAMC2|NGF|PDGFRA|PFKFB2|PFKFB3|PFKFB4|PIK3C2B|PIK3CD|PRKAA2|SLC2A1|VEGFA|VEGFC|OSMR|CREB5|FGF22|DDIT4	-5	MyList
GO Biological Processes	19	GO:0043405	regulation of MAP kinase activity	19_GO:0008152 metabolic process	-6.6	3	6.3	30211	183	1550	28	1.8	0.34	652|859|1906|2081|2247|2321|3357|3553|3815|4067|4217|5468|5788|5997|6091|7124|7422|7474|7855|8844|10019|10333|10636|22943|26191|28951|50507|146433	BMP4|CAV3|EDN1|ERN1|FGF2|FLT1|HTR2B|IL1B|KIT|LYN|MAP3K5|PPARG|PTPRC|RGS2|ROBO1|TNF|VEGFA|WNT5A|FZD5|KSR1|SH2B3|TLR6|RGS14|DKK1|PTPN22|TRIB2|NOX4|IL34	-5	MyList
KEGG Pathway	24	hsa04630	JAK-STAT signaling pathway		-6.6	3.1	6.3	30211	162	1550	26	1.7	0.33	1437|1440|2670|3455|3460|3569|3574|3575|3589|3592|3594|3598|3601|3718|3976|5156|5293|6772|6773|6775|6776|8835|9021|9180|11009|282618	CSF2|CSF3|GFAP|IFNAR2|IFNGR2|IL6|IL7|IL7R|IL11|IL12A|IL12RB1|IL13RA2|IL15RA|JAK3|LIF|PDGFRA|PIK3CD|STAT1|STAT2|STAT4|STAT5A|SOCS2|SOCS3|OSMR|IL24|IFNL1	-5	MyList
GO Biological Processes	19	GO:0060339	negative regulation of type I interferon-mediated signaling pathway	19_GO:0044419 biological process involved in interspecies interaction between organisms	-6.6	8.8	8.1	30211	20	1550	9	0.58	0.19	103|4321|4938|4940|6773|9636|11274|11277|25939	ADAR|MMP12|OAS1|OAS3|STAT2|ISG15|USP18|TREX1|SAMHD1	-4.9	MyList
GO Biological Processes	19	GO:0071357	cellular response to type I interferon	19_GO:0044419 biological process involved in interspecies interaction between organisms	-6.6	8.8	8.1	30211	20	1550	9	0.58	0.19	3434|3455|3665|4615|4939|6672|6772|6773|11277	IFIT1|IFNAR2|IRF7|MYD88|OAS2|SP100|STAT1|STAT2|TREX1	-4.9	MyList
GO Biological Processes	19	GO:0097485	neuron projection guidance	19_GO:0040011 locomotion	-6.6	2.7	6.1	30211	228	1550	32	2.1	0.36	627|1906|1942|1948|2044|2049|2050|2115|2637|2668|2736|3798|3909|3911|3918|4917|5364|5800|6091|6608|7422|7474|7869|8577|8828|10512|23129|54538|56956|57715|64218|223117	BDNF|EDN1|EFNA1|EFNB2|EPHA5|EPHB3|EPHB4|ETV1|GBX2|GDNF|GLI2|KIF5A|LAMA3|LAMA5|LAMC2|NTN3|PLXNB1|PTPRO|ROBO1|SMO|VEGFA|WNT5A|SEMA3B|TMEFF1|NRP2|SEMA3C|PLXND1|ROBO4|LHX9|SEMA4G|SEMA4A|SEMA3D	-4.9	MyList
GO Biological Processes	19	GO:0110149	regulation of biomineralization	19_GO:0110148 biomineralization	-6.6	3.8	6.6	30211	103	1550	20	1.3	0.29	490|652|1051|1080|1594|1901|2697|3091|5552|6348|6662|7043|9636|23462|91461|116039|130497|144347|152816|401138	ATP2B1|BMP4|CEBPB|CFTR|CYP27B1|S1PR1|GJA1|HIF1A|SRGN|CCL3|SOX9|TGFB3|ISG15|HEY1|PKDCC|OSR2|OSR1|RFLNA|ODAPH|AMTN	-4.9	MyList
GO Biological Processes	19	GO:0010951	negative regulation of endopeptidase activity	19_GO:0048519 negative regulation of biological process	-6.6	2.6	6.1	30211	251	1550	34	2.2	0.37	135|329|330|684|718|960|1294|1410|2537|3053|3428|3699|4318|4803|5054|5055|5270|5271|5329|5743|5918|6195|6318|7124|7422|7980|9314|25816|27074|89932|114769|327657|653145|728113	ADORA2A|BIRC2|BIRC3|BST2|C3|CD44|COL7A1|CRYAB|IFI6|SERPIND1|IFI16|ITIH3|MMP9|NGF|SERPINE1|SERPINB2|SERPINE2|SERPINB8|PLAUR|PTGS2|RARRES1|RPS6KA1|SERPINB4|TNF|VEGFA|TFPI2|KLF4|TNFAIP8|LAMP3|PAPLN|CARD16|SERPINA9|ANXA8|ANXA8L1	-4.9	MyList
GO Biological Processes	19	GO:0051148	negative regulation of muscle cell differentiation	19_GO:0032502 developmental process	-6.6	4.6	6.9	30211	68	1550	16	1	0.26	627|859|2069|3398|3481|5997|5999|7494|10014|22943|28514|55553|79365|93649|168620|407006	BDNF|CAV3|EREG|ID2|IGF2|RGS2|RGS4|XBP1|HDAC5|DKK1|DLL1|SOX6|BHLHE41|MYOCD|BHLHA15|MIR221	-4.9	MyList
GO Biological Processes	19	GO:0002720	positive regulation of cytokine production involved in immune response	19_GO:0002376 immune system process	-6.6	4.6	6.9	30211	68	1550	16	1	0.26	972|3133|3134|3553|3569|3815|7292|7474|7855|8013|23586|51704|91543|114548|117854|144811	CD74|HLA-E|HLA-F|IL1B|IL6|KIT|TNFSF4|WNT5A|FZD5|NR4A3|DDX58|GPRC5B|RSAD2|NLRP3|TRIM6|LACC1	-4.9	MyList
GO Biological Processes	19	GO:2000177	regulation of neural precursor cell proliferation	19_GO:0050789 regulation of biological process	-6.6	4.1	6.7	30211	85	1550	18	1.2	0.27	1000|2247|2308|2624|2735|3091|3398|4067|6604|6608|7422|7424|7474|9283|9760|54567|80237|284467	CDH2|FGF2|FOXO1|GATA2|GLI1|HIF1A|ID2|LYN|SMARCD3|SMO|VEGFA|VEGFC|WNT5A|GPR37L1|TOX|DLL4|ELL3|TAFA3	-4.9	MyList
GO Biological Processes	19	GO:0048704	embryonic skeletal system morphogenesis	19_GO:0032502 developmental process	-6.6	3.9	6.6	30211	94	1550	19	1.2	0.28	652|3198|3200|3201|3202|3203|3204|3205|3215|3221|3235|4323|5156|6474|6935|7043|116039|130497|157506	BMP4|HOXA1|HOXA3|HOXA4|HOXA5|HOXA6|HOXA7|HOXA9|HOXB5|HOXC4|HOXD9|MMP14|PDGFRA|SHOX2|ZEB1|TGFB3|OSR2|OSR1|RDH10	-4.9	MyList
GO Biological Processes	19	GO:0007259	receptor signaling pathway via JAK-STAT	19_GO:0023052 signaling	-6.6	5.6	7.2	30211	45	1550	13	0.84	0.23	1437|3455|3718|3976|6347|6772|6773|6775|6776|8835|9021|9111|282618	CSF2|IFNAR2|JAK3|LIF|CCL2|STAT1|STAT2|STAT4|STAT5A|SOCS2|SOCS3|NMI|IFNL1	-4.9	MyList
KEGG Pathway	24	hsa04020	Calcium signaling pathway		-6.6	2.7	6.1	30211	240	1550	33	2.1	0.37	135|146|490|623|624|1129|2065|2149|2247|2252|2321|2668|2769|2925|3357|3709|4803|5021|5026|5136|5156|5330|5533|7422|7424|8912|9127|10105|23236|27006|84812|113026|196883	ADORA2A|ADRA1D|ATP2B1|BDKRB1|BDKRB2|CHRM2|ERBB3|F2R|FGF2|FGF7|FLT1|GDNF|GNA15|GRPR|HTR2B|ITPR2|NGF|OXTR|P2RX5|PDE1A|PDGFRA|PLCB2|PPP3CC|VEGFA|VEGFC|CACNA1H|P2RX6|PPIF|PLCB1|FGF22|PLCD4|PLCD3|ADCY4	-4.9	MyList
GO Biological Processes	19	GO:0008283	cell population proliferation	19_GO:0009987 cellular process	-6.6	2.1	5.8	30211	489	1550	53	3.4	0.46	25|374|634|639|652|861|947|972|1051|1435|2009|2069|2081|2120|2247|2252|2637|2697|3398|3569|3575|3660|3726|3815|4323|4683|4824|5163|5699|5788|6195|6662|6772|6781|7124|7474|7477|8013|8091|8767|8995|9464|10148|11119|26298|27111|56956|65009|116039|130497|146433|168667|389125	ABL1|AREG|CEACAM1|PRDM1|BMP4|RUNX1|CD34|CD74|CEBPB|CSF1|EML1|EREG|ERN1|ETV6|FGF2|FGF7|GBX2|GJA1|ID2|IL6|IL7R|IRF2|JUNB|KIT|MMP14|NBN|NKX3-1|PDK1|PSMB10|PTPRC|RPS6KA1|SOX9|STAT1|STC1|TNF|WNT5A|WNT7B|NR4A3|HMGA2|RIPK2|TNFSF18|HAND2|EBI3|BTN3A1|EHF|SDCBP2|LHX9|NDRG4|OSR2|OSR1|IL34|BMPER|MUSTN1	-4.9	MyList
GO Biological Processes	19	GO:1903531	negative regulation of secretion by cell	19_GO:0051179 localization	-6.5	3.3	6.3	30211	143	1550	24	1.5	0.31	18|134|634|1906|2149|2697|3134|3351|3553|3589|3592|3598|3623|3624|3965|3976|7133|7779|51738|79651|80223|84830|90007|91543	ABAT|ADORA1|CEACAM1|EDN1|F2R|GJA1|HLA-F|HTR1B|IL1B|IL11|IL12A|IL13RA2|INHA|INHBA|LGALS9|LIF|TNFRSF1B|SLC30A1|GHRL|RHBDF2|RAB11FIP1|ADTRP|MIDN|RSAD2	-4.9	MyList
GO Biological Processes	19	GO:0061041	regulation of wound healing	19_GO:0050896 response to stimulus	-6.5	3.4	6.4	30211	133	1550	23	1.5	0.31	18|634|947|1839|1906|2149|2161|2247|3818|5054|5055|5156|5270|5328|7124|7128|7494|8613|10019|84830|114897|407006|100506658	ABAT|CEACAM1|CD34|HBEGF|EDN1|F2R|F12|FGF2|KLKB1|SERPINE1|SERPINB2|PDGFRA|SERPINE2|PLAU|TNF|TNFAIP3|XBP1|PLPP3|SH2B3|ADTRP|C1QTNF1|MIR221|OCLN	-4.9	MyList
WikiPathways	27	WP5113	Antiviral and anti-inflammatory effects of Nrf2 on SARS-CoV-2 pathway		-6.5	6.7	7.5	30211	32	1550	11	0.71	0.21	2977|3553|3569|3576|3592|4312|4314|4790|4792|6347|7124	GUCY1A2|IL1B|IL6|CXCL8|IL12A|MMP1|MMP3|NFKB1|NFKBIA|CCL2|TNF	-4.9	MyList
Canonical Pathways	11	M36	PID IL27 PATHWAY		-6.5	7.5	7.7	30211	26	1550	10	0.65	0.2	3553|3569|3592|3594|6772|6773|6775|6776|7124|10148	IL1B|IL6|IL12A|IL12RB1|STAT1|STAT2|STAT4|STAT5A|TNF|EBI3	-4.8	MyList
GO Biological Processes	19	GO:0002753	cytoplasmic pattern recognition receptor signaling pathway	19_GO:0002376 immune system process	-6.5	7.5	7.7	30211	26	1550	10	0.65	0.2	1540|3665|4792|4940|7128|8767|23586|64135|92610|144811	CYLD|IRF7|NFKBIA|OAS3|TNFAIP3|RIPK2|DDX58|IFIH1|TIFA|LACC1	-4.8	MyList
WikiPathways	27	WP3865	Novel intracellular components of RIG-I-like receptor (RLR) pathway		-6.5	4.8	6.9	30211	61	1550	15	0.97	0.25	843|1540|3576|3627|3665|4790|4792|4793|7124|7706|9636|9641|23586|64135|79132	CASP10|CYLD|CXCL8|CXCL10|IRF7|NFKB1|NFKBIA|NFKBIB|TNF|TRIM25|ISG15|IKBKE|DDX58|IFIH1|DHX58	-4.8	MyList
WikiPathways	27	WP2877	Vitamin D receptor pathway		-6.5	2.9	6.2	30211	186	1550	28	1.8	0.34	490|623|634|639|1594|1647|2050|2308|3091|3397|3592|3663|3726|3965|4600|4814|4982|5734|5744|6304|7128|7292|7421|7869|9314|29785|50486|283229	ATP2B1|BDKRB1|CEACAM1|PRDM1|CYP27B1|GADD45A|EPHB4|FOXO1|HIF1A|ID1|IL12A|IRF5|JUNB|LGALS9|MX2|NINJ1|TNFRSF11B|PTGER4|PTHLH|SATB1|TNFAIP3|TNFSF4|VDR|SEMA3B|KLF4|CYP2S1|G0S2|CRACR2B	-4.8	MyList
WikiPathways	27	WP5083	Neuroinflammation and glutamatergic signaling		-6.5	3.2	6.3	30211	144	1550	24	1.5	0.31	627|2247|2670|3460|3552|3553|3569|3592|3976|4790|4791|4803|5330|6506|6513|6772|7043|7124|7133|9021|23236|54407|80131|84254	BDNF|FGF2|GFAP|IFNGR2|IL1A|IL1B|IL6|IL12A|LIF|NFKB1|NFKB2|NGF|PLCB2|SLC1A2|SLC2A1|STAT1|TGFB3|TNF|TNFRSF1B|SOCS3|PLCB1|SLC38A2|LRRC8E|CAMKK1	-4.8	MyList
GO Biological Processes	19	GO:0044057	regulation of system process	19_GO:0032501 multicellular organismal process	-6.5	2	5.7	30211	573	1550	59	3.8	0.49	18|25|133|134|135|146|490|624|668|783|859|1129|1839|1890|1906|2149|2308|2643|2697|2852|3552|3623|3624|3781|3815|4824|4987|5021|5142|5468|5743|5800|5997|5999|6348|6474|6781|7124|7133|8013|8862|8912|9294|9464|9722|10458|10699|11343|22999|27242|51738|57731|80149|81832|84866|93649|112755|114897|114907	ABAT|ABL1|ADM|ADORA1|ADORA2A|ADRA1D|ATP2B1|BDKRB2|FOXL2|CACNB2|CAV3|CHRM2|HBEGF|TYMP|EDN1|F2R|FOXO1|GCH1|GJA1|GPER1|IL1A|INHA|INHBA|KCNN2|KIT|NKX3-1|OPRL1|OXTR|PDE4B|PPARG|PTGS2|PTPRO|RGS2|RGS4|CCL3|SHOX2|STC1|TNF|TNFRSF1B|NR4A3|APLN|CACNA1H|S1PR2|HAND2|NOS1AP|BAIAP2|CORIN|MGLL|RIMS1|TNFRSF21|GHRL|SPTBN4|ZC3H12A|NETO1|TMEM25|MYOCD|STX1B|C1QTNF1|FBXO32	-4.8	MyList
GO Biological Processes	19	GO:0097696	receptor signaling pathway via STAT	19_GO:0023052 signaling	-6.5	5.5	7.1	30211	46	1550	13	0.84	0.23	1437|3455|3718|3976|6347|6772|6773|6775|6776|8835|9021|9111|282618	CSF2|IFNAR2|JAK3|LIF|CCL2|STAT1|STAT2|STAT4|STAT5A|SOCS2|SOCS3|NMI|IFNL1	-4.8	MyList
GO Biological Processes	19	GO:0051154	negative regulation of striated muscle cell differentiation	19_GO:0032502 developmental process	-6.5	6	7.3	30211	39	1550	12	0.77	0.22	627|859|5997|5999|7494|10014|22943|28514|55553|79365|93649|168620	BDNF|CAV3|RGS2|RGS4|XBP1|HDAC5|DKK1|DLL1|SOX6|BHLHE41|MYOCD|BHLHA15	-4.8	MyList
GO Biological Processes	19	GO:0007420	brain development	19_GO:0032502 developmental process	-6.4	1.9	5.5	30211	742	1550	71	4.6	0.53	18|25|220|357|490|652|999|1000|1901|1952|2009|2044|2049|2247|2624|2637|2735|2736|3084|3091|3309|3397|3398|3624|4155|4211|5013|5021|5087|5209|5270|5533|5997|5999|6091|6506|6513|6608|6751|6935|7026|7360|7474|7477|8382|8828|9760|10409|10458|22891|22903|22943|23236|28514|54407|54510|54541|55130|55506|55553|55582|57463|65009|65078|79625|79633|84630|84879|93986|284612|347902	ABAT|ABL1|ALDH1A3|SHROOM2|ATP2B1|BMP4|CDH1|CDH2|S1PR1|CELSR2|EML1|EPHA5|EPHB3|FGF2|GATA2|GBX2|GLI1|GLI2|NRG1|HIF1A|HSPA5|ID1|ID2|INHBA|MBP|MEIS1|OTX1|OXTR|PBX1|PFKFB3|SERPINE2|PPP3CC|RGS2|RGS4|ROBO1|SLC1A2|SLC2A1|SMO|SSTR1|ZEB1|NR2F2|UGP2|WNT5A|WNT7B|NME5|NRP2|TOX|BASP1|BAIAP2|ZNF365|BTBD3|DKK1|PLCB1|DLL1|SLC38A2|PCDH18|DDIT4|ODAD2|MACROH2A2|SOX6|KIF27|AMIGO1|NDRG4|RTN4R|NDNF|FAT4|TTBK1|MFSD2A|FO…	-4.8	MyList
GO Biological Processes	19	GO:0010959	regulation of metal ion transport	19_GO:0051179 localization	-6.4	2.2	5.8	30211	403	1550	46	3	0.43	25|88|134|135|490|623|783|784|825|859|2149|2852|3306|3627|3718|3755|3781|3787|4067|4987|5026|5142|5270|5371|5743|5999|6236|6347|6348|6351|6352|6373|6781|7225|7779|9722|11151|23072|57463|57520|57731|81832|130497|151651|154043|283229	ABL1|ACTN2|ADORA1|ADORA2A|ATP2B1|BDKRB1|CACNB2|CACNB3|CAPN3|CAV3|F2R|GPER1|HSPA2|CXCL10|JAK3|KCNG1|KCNN2|KCNS1|LYN|OPRL1|P2RX5|PDE4B|SERPINE2|PML|PTGS2|RGS4|RRAD|CCL2|CCL3|CCL4|CCL5|CXCL11|STC1|TRPC6|SLC30A1|NOS1AP|CORO1A|HECW1|AMIGO1|HECW2|SPTBN4|NETO1|OSR1|EFHB|CNKSR3|CRACR2B	-4.8	MyList
KEGG Pathway	24	hsa04622	RIG-I-like receptor signaling pathway		-6.4	4.5	6.7	30211	70	1550	16	1	0.26	843|1540|3576|3592|3627|3665|4790|4792|4793|7124|7706|9636|9641|23586|64135|79132	CASP10|CYLD|CXCL8|IL12A|CXCL10|IRF7|NFKB1|NFKBIA|NFKBIB|TNF|TRIM25|ISG15|IKBKE|DDX58|IFIH1|DHX58	-4.8	MyList
GO Biological Processes	19	GO:0045661	regulation of myoblast differentiation	19_GO:0032502 developmental process	-6.4	5.1	6.9	30211	54	1550	14	0.9	0.24	652|825|3399|3627|4217|4654|6662|7124|10324|23236|28514|55796|93649|144165	BMP4|CAPN3|ID3|CXCL10|MAP3K5|MYOD1|SOX9|TNF|KLHL41|PLCB1|DLL1|MBNL3|MYOCD|PRICKLE1	-4.8	MyList
GO Biological Processes	19	GO:0062207	regulation of pattern recognition receptor signaling pathway	19_GO:0002376 immune system process	-6.4	3.7	6.4	30211	106	1550	20	1.3	0.29	329|330|3430|3659|3665|4067|4814|6565|7098|7128|8638|10333|26191|51296|54726|55601|79132|91543|338382|730249	BIRC2|BIRC3|IFI35|IRF1|IRF7|LYN|NINJ1|SLC15A2|TLR3|TNFAIP3|OASL|TLR6|PTPN22|SLC15A3|OTUD4|DDX60|DHX58|RSAD2|RAB7B|ACOD1	-4.7	MyList
GO Biological Processes	19	GO:0032727	positive regulation of interferon-alpha production	19_GO:0048518 positive regulation of biological process	-6.4	8.4	7.8	30211	21	1550	9	0.58	0.19	3663|3665|4321|6772|7098|8767|23586|51284|64135	IRF5|IRF7|MMP12|STAT1|TLR3|RIPK2|DDX58|TLR7|IFIH1	-4.7	MyList
Reactome Gene Sets	6	R-HSA-1606322	ZBP1(DAI) mediated induction of type I IFNs		-6.4	8.4	7.8	30211	21	1550	9	0.58	0.19	4615|4790|4791|4792|4793|7098|23220|81030|147945	MYD88|NFKB1|NFKB2|NFKBIA|NFKBIB|TLR3|DTX4|ZBP1|NLRP4	-4.7	MyList
GO Biological Processes	19	GO:0019885	antigen processing and presentation of endogenous peptide antigen via MHC class I	19_GO:0002376 immune system process	-6.4	9.7	8.1	30211	16	1550	8	0.52	0.18	3106|3133|3134|6890|6891|6892|51752|64167	HLA-B|HLA-E|HLA-F|TAP1|TAP2|TAPBP|ERAP1|ERAP2	-4.7	MyList
GO Biological Processes	19	GO:0050769	positive regulation of neurogenesis	19_GO:0032502 developmental process	-6.4	2.7	6	30211	222	1550	31	2	0.36	627|2670|2852|3091|3398|3553|3569|3815|3976|4067|4803|5270|5364|6091|6474|6604|6608|7124|7133|7422|7424|10458|10636|22891|23129|57463|80237|84630|114798|146433|407006	BDNF|GFAP|GPER1|HIF1A|ID2|IL1B|IL6|KIT|LIF|LYN|NGF|SERPINE2|PLXNB1|ROBO1|SHOX2|SMARCD3|SMO|TNF|TNFRSF1B|VEGFA|VEGFC|BAIAP2|RGS14|ZNF365|PLXND1|AMIGO1|ELL3|TTBK1|SLITRK1|IL34|MIR221	-4.7	MyList
WikiPathways	27	WP2839	Hair follicle development: organogenesis - part 2 of 3		-6.4	6.5	7.3	30211	33	1550	11	0.71	0.21	652|999|2735|2736|3624|3911|4790|5156|6608|6615|7474	BMP4|CDH1|GLI1|GLI2|INHBA|LAMA5|NFKB1|PDGFRA|SMO|SNAI1|WNT5A	-4.7	MyList
WikiPathways	27	WP4481	Resistin as a regulator of inflammation		-6.4	6.5	7.3	30211	33	1550	11	0.71	0.21	3569|3576|3592|4790|4792|5293|5330|7124|23236|84812|113026	IL6|CXCL8|IL12A|NFKB1|NFKBIA|PIK3CD|PLCB2|TNF|PLCB1|PLCD4|PLCD3	-4.7	MyList
GO Biological Processes	19	GO:0010977	negative regulation of neuron projection development	19_GO:0032502 developmental process	-6.4	3.3	6.2	30211	136	1550	23	1.5	0.31	1942|1948|2670|4155|5800|6911|7025|7474|7869|10512|22891|22943|23251|23258|27124|57715|64218|65078|80128|112755|157285|223117|349667	EFNA1|EFNB2|GFAP|MBP|PTPRO|TBX6|NR2F1|WNT5A|SEMA3B|SEMA3C|ZNF365|DKK1|MINAR1|DENND5A|INPP5J|SEMA4G|SEMA4A|RTN4R|TRIM46|STX1B|PRAG1|SEMA3D|RTN4RL2	-4.7	MyList
KEGG Pathway	24	hsa04210	Apoptosis		-6.4	3.3	6.2	30211	136	1550	23	1.5	0.31	329|330|597|637|840|843|1520|1647|2081|3709|4217|4790|4792|4803|5293|5783|7124|7185|7277|8739|8743|8795|8837	BIRC2|BIRC3|BCL2A1|BID|CASP7|CASP10|CTSS|GADD45A|ERN1|ITPR2|MAP3K5|NFKB1|NFKBIA|NGF|PIK3CD|PTPN13|TNF|TRAF1|TUBA4A|HRK|TNFSF10|TNFRSF10B|CFLAR	-4.7	MyList
GO Biological Processes	19	GO:0062012	regulation of small molecule metabolic process	19_GO:0008152 metabolic process	-6.4	2.3	5.8	30211	342	1550	41	2.6	0.41	32|133|205|341|634|972|1594|2053|2308|2330|2852|3091|3481|3553|3795|3815|4790|5163|5208|5468|5507|5563|5743|5745|6591|6615|6662|7124|8013|11182|11277|23541|54541|55022|84879|90007|114897|134429|144811|157506|158219	ACACB|ADM|AK4|APOC1|CEACAM1|CD74|CYP27B1|EPHX2|FOXO1|FMO5|GPER1|HIF1A|IGF2|IL1B|KHK|KIT|NFKB1|PDK1|PFKFB2|PPARG|PPP1R3C|PRKAA2|PTGS2|PTH1R|SNAI2|SNAI1|SOX9|TNF|NR4A3|SLC2A6|TREX1|SEC14L2|DDIT4|PID1|MFSD2A|MIDN|C1QTNF1|STARD4|LACC1|RDH10|TTC39B	-4.7	MyList
GO Biological Processes	19	GO:0032647	regulation of interferon-alpha production	19_GO:0032501 multicellular organismal process	-6.3	7.2	7.5	30211	27	1550	10	0.65	0.2	3663|3665|4321|6772|7098|8767|9111|23586|51284|64135	IRF5|IRF7|MMP12|STAT1|TLR3|RIPK2|NMI|DDX58|TLR7|IFIH1	-4.7	MyList
GO Biological Processes	19	GO:0050818	regulation of coagulation	19_GO:0032501 multicellular organismal process	-6.3	4.4	6.7	30211	71	1550	16	1	0.26	18|634|947|1906|2149|2161|3818|5054|5055|5156|5270|5328|10019|84830|114897|222537	ABAT|CEACAM1|CD34|EDN1|F2R|F12|KLKB1|SERPINE1|SERPINB2|PDGFRA|SERPINE2|PLAU|SH2B3|ADTRP|C1QTNF1|HS3ST5	-4.7	MyList
GO Biological Processes	19	GO:0006970	response to osmotic stress	19_GO:0050896 response to stimulus	-6.3	4.4	6.7	30211	71	1550	16	1	0.26	231|624|825|1263|5743|5971|6326|6513|7098|7124|8531|8564|23308|80131|83959|92241	AKR1B1|BDKRB2|CAPN3|PLK3|PTGS2|RELB|SCN2A|SLC2A1|TLR3|TNF|YBX3|KMO|ICOSLG|LRRC8E|SLC4A11|RCSD1	-4.7	MyList
GO Biological Processes	19	GO:0043409	negative regulation of MAPK cascade	19_GO:0023052 signaling	-6.3	2.9	6.1	30211	179	1550	27	1.7	0.33	25|467|652|859|1540|1846|1850|1942|2308|2633|2852|3553|3976|4067|5468|5788|5997|8000|10019|10318|10347|10385|10636|26191|153769|154043|407006	ABL1|ATF3|BMP4|CAV3|CYLD|DUSP4|DUSP8|EFNA1|FOXO1|GBP1|GPER1|IL1B|LIF|LYN|PPARG|PTPRC|RGS2|PSCA|SH2B3|TNIP1|ABCA7|BTN2A2|RGS14|PTPN22|SH3RF2|CNKSR3|MIR221	-4.7	MyList
GO Biological Processes	19	GO:0010883	regulation of lipid storage	19_GO:0051179 localization	-6.3	5	6.8	30211	55	1550	14	0.9	0.24	19|32|718|3569|4023|4232|4790|4792|5468|7124|9641|10938|80149|158219	ABCA1|ACACB|C3|IL6|LPL|MEST|NFKB1|NFKBIA|PPARG|TNF|IKBKE|EHD1|ZC3H12A|TTC39B	-4.7	MyList
GO Biological Processes	19	GO:0061098	positive regulation of protein tyrosine kinase activity	19_GO:0048518 positive regulation of biological process	-6.3	5	6.8	30211	55	1550	14	0.9	0.24	134|374|685|1839|1942|2065|2069|3084|4739|6352|50507|51704|51738|146433	ADORA1|AREG|BTC|HBEGF|EFNA1|ERBB3|EREG|NRG1|NEDD9|CCL5|NOX4|GPRC5B|GHRL|IL34	-4.7	MyList
GO Biological Processes	19	GO:0032653	regulation of interleukin-10 production	19_GO:0032501 multicellular organismal process	-6.3	4.6	6.7	30211	63	1550	15	0.97	0.25	947|961|3569|3620|3718|3965|7292|9308|9636|27242|28514|28951|29126|64115|80380	CD34|CD47|IL6|IDO1|JAK3|LGALS9|TNFSF4|CD83|ISG15|TNFRSF21|DLL1|TRIB2|CD274|VSIR|PDCD1LG2	-4.7	MyList
Canonical Pathways	11	M145	PID P53 DOWNSTREAM PATHWAY		-6.3	3.3	6.2	30211	137	1550	23	1.5	0.31	467|597|624|637|639|834|843|1263|1647|3663|3732|3976|5054|5371|6591|6890|7421|8795|10397|22943|28984|54541|255488	ATF3|BCL2A1|BDKRB2|BID|PRDM1|CASP1|CASP10|PLK3|GADD45A|IRF5|CD82|LIF|SERPINE1|PML|SNAI2|TAP1|VDR|TNFRSF10B|NDRG1|DKK1|RGCC|DDIT4|RNF144B	-4.7	MyList
WikiPathways	27	WP615	Senescence and autophagy in cancer		-6.3	3.6	6.3	30211	108	1550	20	1.3	0.29	960|1051|1300|2919|3428|3552|3553|3569|3576|3624|3659|3663|3665|4323|5054|5055|5328|5606|6348|11009	CD44|CEBPB|COL10A1|CXCL1|IFI16|IL1A|IL1B|IL6|CXCL8|INHBA|IRF1|IRF5|IRF7|MMP14|SERPINE1|SERPINB2|PLAU|MAP2K3|CCL3|IL24	-4.6	MyList
GO Biological Processes	19	GO:0048545	response to steroid hormone	19_GO:0050896 response to stimulus	-6.2	2.5	5.8	30211	272	1550	35	2.3	0.38	15|21|133|367|374|445|490|652|1906|2852|3351|3569|4015|4155|4654|4824|5021|5069|5732|5743|6781|7023|7043|7124|7352|7477|8013|8837|10628|54541|55809|84709|84830|114907|730249	AANAT|ABCA3|ADM|AR|AREG|ASS1|ATP2B1|BMP4|EDN1|GPER1|HTR1B|IL6|LOX|MBP|MYOD1|NKX3-1|OXTR|PAPPA|PTGER2|PTGS2|STC1|TFAP4|TGFB3|TNF|UCP3|WNT7B|NR4A3|CFLAR|TXNIP|DDIT4|TRERF1|MGARP|ADTRP|FBXO32|ACOD1	-4.6	MyList
GO Biological Processes	19	GO:0050808	synapse organization	19_GO:0009987 cellular process	-6.2	2.5	5.8	30211	284	1550	36	2.3	0.38	627|718|783|784|999|1000|1948|2049|2149|2668|2823|3084|4774|5364|5641|6623|7474|7477|7855|8497|9722|10458|22865|22866|22891|22943|23024|23129|27253|55638|78999|80863|114798|145581|347731|643866	BDNF|C3|CACNB2|CACNB3|CDH1|CDH2|EFNB2|EPHB3|F2R|GDNF|GPM6A|NRG1|NFIA|PLXNB1|LGMN|SNCG|WNT5A|WNT7B|FZD5|PPFIA4|NOS1AP|BAIAP2|SLITRK3|CNKSR2|ZNF365|DKK1|PDZRN3|PLXND1|PCDH17|SYBU|LRFN4|PRRT1|SLITRK1|LRFN5|LRRTM3|CBLN3	-4.6	MyList
GO Biological Processes	19	GO:0045639	positive regulation of myeloid cell differentiation	19_GO:0002376 immune system process	-6.2	3.7	6.4	30211	99	1550	19	1.2	0.28	861|972|1435|1440|2113|2124|2624|3091|3202|3398|3624|3976|6772|7124|8111|9636|146433|338382|407006	RUNX1|CD74|CSF1|CSF3|ETS1|EVI2B|GATA2|HIF1A|HOXA5|ID2|INHBA|LIF|STAT1|TNF|GPR68|ISG15|IL34|RAB7B|MIR221	-4.6	MyList
KEGG Pathway	24	hsa04640	Hematopoietic cell lineage		-6.2	3.7	6.4	30211	99	1550	19	1.2	0.28	947|960|1379|1435|1437|1440|2323|3112|3552|3553|3569|3574|3575|3589|3655|3672|3674|3815|7124	CD34|CD44|CR1L|CSF1|CSF2|CSF3|FLT3LG|HLA-DOB|IL1A|IL1B|IL6|IL7|IL7R|IL11|ITGA6|ITGA1|ITGA2B|KIT|TNF	-4.6	MyList
GO Biological Processes	19	GO:0030336	negative regulation of cell migration	19_GO:0040011 locomotion	-6.2	2.3	5.7	30211	346	1550	41	2.6	0.41	134|684|972|999|1588|1634|1647|1803|2247|2697|3084|3204|4163|4223|4286|5054|5468|5734|6091|6347|6672|6781|7026|7124|7130|9294|9314|9863|10014|11009|23236|23671|28984|29775|54567|56833|65009|84830|93649|114757|407006	ADORA1|BST2|CD74|CDH1|CYP19A1|DCN|GADD45A|DPP4|FGF2|GJA1|NRG1|HOXA7|MCC|MEOX2|MITF|SERPINE1|PPARG|PTGER4|ROBO1|CCL2|SP100|STC1|NR2F2|TNF|TNFAIP6|S1PR2|KLF4|MAGI2|HDAC5|IL24|PLCB1|TMEFF2|RGCC|CARD10|DLL4|SLAMF8|NDRG4|ADTRP|MYOCD|CYGB|MIR221	-4.6	MyList
GO Biological Processes	19	GO:0007565	female pregnancy	19_GO:0022414 reproductive process	-6.2	3	6	30211	170	1550	26	1.7	0.33	133|367|639|1594|3553|3620|3726|3965|3976|4318|5021|5069|5743|5744|5997|6019|6513|6781|7026|7043|7421|10699|23780|51738|54407|730249	ADM|AR|PRDM1|CYP27B1|IL1B|IDO1|JUNB|LGALS9|LIF|MMP9|OXTR|PAPPA|PTGS2|PTHLH|RGS2|RLN2|SLC2A1|STC1|NR2F2|TGFB3|VDR|CORIN|APOL2|GHRL|SLC38A2|ACOD1	-4.6	MyList
Reactome Gene Sets	6	R-HSA-1834949	Cytosolic sensors of pathogen-associated DNA		-6.2	4.6	6.6	30211	64	1550	15	0.97	0.25	661|3428|3665|4615|4790|4791|4792|4793|6737|7098|9447|11277|23220|81030|147945	POLR3D|IFI16|IRF7|MYD88|NFKB1|NFKB2|NFKBIA|NFKBIB|TRIM21|TLR3|AIM2|TREX1|DTX4|ZBP1|NLRP4	-4.6	MyList
WikiPathways	27	WP3941	Oxidative damage response		-6.2	5.7	7	30211	41	1550	12	0.77	0.22	715|716|717|719|1028|1647|4790|4794|7124|7133|7185|10188	C1R|C1S|C2|C3AR1|CDKN1C|GADD45A|NFKB1|NFKBIE|TNF|TNFRSF1B|TRAF1|TNK2	-4.6	MyList
GO Biological Processes	19	GO:0150077	regulation of neuroinflammatory response	19_GO:0050896 response to stimulus	-6.2	5.7	7	30211	41	1550	12	0.77	0.22	3553|3569|4314|4318|5743|5788|6348|7124|7133|84630|90865|284467	IL1B|IL6|MMP3|MMP9|PTGS2|PTPRC|CCL3|TNF|TNFRSF1B|TTBK1|IL33|TAFA3	-4.6	MyList
GO Biological Processes	19	GO:0071900	regulation of protein serine/threonine kinase activity	19_GO:0008152 metabolic process	-6.2	2.3	5.7	30211	372	1550	43	2.8	0.42	25|652|859|1028|1647|1906|2081|2247|2321|3357|3481|3553|3815|4067|4217|4515|5468|5788|5997|6091|7023|7026|7124|7128|7422|7474|7855|8091|8844|10019|10333|10636|22943|26191|28951|28984|50507|51191|56892|85417|93649|124790|146433	ABL1|BMP4|CAV3|CDKN1C|GADD45A|EDN1|ERN1|FGF2|FLT1|HTR2B|IGF2|IL1B|KIT|LYN|MAP3K5|MTCP1|PPARG|PTPRC|RGS2|ROBO1|TFAP4|NR2F2|TNF|TNFAIP3|VEGFA|WNT5A|FZD5|HMGA2|KSR1|SH2B3|TLR6|RGS14|DKK1|PTPN22|TRIB2|RGCC|NOX4|HERC5|TCIM|CCNB3|MYOCD|HEXIM2|IL34	-4.6	MyList
GO Biological Processes	19	GO:0010466	negative regulation of peptidase activity	19_GO:0048519 negative regulation of biological process	-6.2	2.5	5.8	30211	262	1550	34	2.2	0.37	135|329|330|684|718|960|1294|1410|2537|3053|3428|3699|4318|4803|5054|5055|5270|5271|5329|5743|5918|6195|6318|7124|7422|7980|9314|25816|27074|89932|114769|327657|653145|728113	ADORA2A|BIRC2|BIRC3|BST2|C3|CD44|COL7A1|CRYAB|IFI6|SERPIND1|IFI16|ITIH3|MMP9|NGF|SERPINE1|SERPINB2|SERPINE2|SERPINB8|PLAUR|PTGS2|RARRES1|RPS6KA1|SERPINB4|TNF|VEGFA|TFPI2|KLF4|TNFAIP8|LAMP3|PAPLN|CARD16|SERPINA9|ANXA8|ANXA8L1	-4.5	MyList
GO Biological Processes	19	GO:0002474	antigen processing and presentation of peptide antigen via MHC class I	19_GO:0002376 immune system process	-6.2	7	7.3	30211	28	1550	10	0.65	0.2	2207|3106|3133|3134|6890|6891|6892|10437|51752|64167	FCER1G|HLA-B|HLA-E|HLA-F|TAP1|TAP2|TAPBP|IFI30|ERAP1|ERAP2	-4.5	MyList
GO Biological Processes	19	GO:0061045	negative regulation of wound healing	19_GO:0048519 negative regulation of biological process	-6.2	4.3	6.5	30211	73	1550	16	1	0.26	18|634|947|1906|2161|2247|3818|5054|5055|5156|5270|5328|7124|10019|84830|114897	ABAT|CEACAM1|CD34|EDN1|F12|FGF2|KLKB1|SERPINE1|SERPINB2|PDGFRA|SERPINE2|PLAU|TNF|SH2B3|ADTRP|C1QTNF1	-4.5	MyList
GO Biological Processes	19	GO:0043535	regulation of blood vessel endothelial cell migration	19_GO:0040011 locomotion	-6.2	3.1	6	30211	150	1550	24	1.5	0.31	25|1647|1942|2113|2247|2624|3091|4223|5468|5606|5743|6776|7124|7422|7424|9314|9734|10014|10769|28984|29775|54567|57381|407006	ABL1|GADD45A|EFNA1|ETS1|FGF2|GATA2|HIF1A|MEOX2|PPARG|MAP2K3|PTGS2|STAT5A|TNF|VEGFA|VEGFC|KLF4|HDAC9|HDAC5|PLK2|RGCC|CARD10|DLL4|RHOJ|MIR221	-4.5	MyList
GO Biological Processes	19	GO:0070098	chemokine-mediated signaling pathway	19_GO:0023052 signaling	-6.1	4	6.4	30211	82	1550	17	1.1	0.26	2919|2920|2921|3576|3627|6347|6348|6351|6352|6354|6355|6364|6372|6373|6374|10019|51554	CXCL1|CXCL2|CXCL3|CXCL8|CXCL10|CCL2|CCL3|CCL4|CCL5|CCL7|CCL8|CCL20|CXCL6|CXCL11|CXCL5|SH2B3|ACKR4	-4.5	MyList
GO Biological Processes	19	GO:0051924	regulation of calcium ion transport	19_GO:0051179 localization	-6.1	2.6	5.8	30211	251	1550	33	2.1	0.37	25|135|490|623|783|784|825|859|2149|2852|3306|3627|3718|4067|4987|5026|5142|5371|5743|5999|6236|6347|6348|6351|6352|6373|6781|7225|7779|9722|11151|151651|283229	ABL1|ADORA2A|ATP2B1|BDKRB1|CACNB2|CACNB3|CAPN3|CAV3|F2R|GPER1|HSPA2|CXCL10|JAK3|LYN|OPRL1|P2RX5|PDE4B|PML|PTGS2|RGS4|RRAD|CCL2|CCL3|CCL4|CCL5|CXCL11|STC1|TRPC6|SLC30A1|NOS1AP|CORO1A|EFHB|CRACR2B	-4.5	MyList
GO Biological Processes	19	GO:0045089	positive regulation of innate immune response	19_GO:0044419 biological process involved in interspecies interaction between organisms	-6.1	3.2	6.1	30211	140	1550	23	1.5	0.31	661|2069|3133|3134|3428|3430|3592|3665|3902|4067|4321|5359|6352|7474|9111|9447|9641|57169|81030|83666|85363|115362|117854	POLR3D|EREG|HLA-E|HLA-F|IFI16|IFI35|IL12A|IRF7|LAG3|LYN|MMP12|PLSCR1|CCL5|WNT5A|NMI|AIM2|IKBKE|ZNFX1|ZBP1|PARP9|TRIM5|GBP5|TRIM6	-4.5	MyList
GO Biological Processes	19	GO:0007519	skeletal muscle tissue development	19_GO:0032502 developmental process	-6.1	3.4	6.2	30211	120	1550	21	1.4	0.29	467|607|668|1827|2006|3142|3235|3679|4223|4654|6608|7026|7504|8837|9242|10324|10472|23764|27063|28514|59269	ATF3|BCL9|FOXL2|RCAN1|ELN|HLX|HOXD9|ITGA7|MEOX2|MYOD1|SMO|NR2F2|XK|CFLAR|MSC|KLHL41|ZBTB18|MAFF|ANKRD1|DLL1|HIVEP3	-4.5	MyList
GO Biological Processes	19	GO:0098609	cell-cell adhesion	19_GO:0022610 biological adhesion	-6.1	2	5.5	30211	533	1550	55	3.5	0.47	421|634|947|960|961|999|1000|1008|1016|1952|3383|3386|3553|3655|3672|3674|3679|3695|3815|3875|3909|3911|4814|4973|5099|5156|5271|5788|6091|6352|6662|7124|7412|7477|8613|8876|10318|10458|11187|22865|27253|54510|54538|55971|56109|57463|57575|64116|78999|79633|114798|145581|222256|347902|375033	ARVCF|CEACAM1|CD34|CD44|CD47|CDH1|CDH2|CDH10|CDH18|CELSR2|ICAM1|ICAM4|IL1B|ITGA6|ITGA1|ITGA2B|ITGA7|ITGB7|KIT|KRT18|LAMA3|LAMA5|NINJ1|OLR1|PCDH7|PDGFRA|SERPINB8|PTPRC|ROBO1|CCL5|SOX9|TNF|VCAM1|WNT7B|PLPP3|VNN1|TNIP1|BAIAP2|PKP3|SLITRK3|PCDH17|PCDH18|ROBO4|BAIAP2L1|PCDHGA6|AMIGO1|PCDH10|SLC39A8|LRFN4|FAT4|SLITRK1|LRFN5|CDHR3|AMIGO2|PEAR1	-4.5	MyList
GO Biological Processes	19	GO:1905952	regulation of lipid localization	19_GO:0051179 localization	-6.1	2.9	5.9	30211	183	1550	27	1.7	0.33	19|21|32|341|718|1588|1906|3552|3553|3569|4023|4790|4792|4824|5468|7124|9536|9641|10347|10802|10938|51703|51738|80149|80820|114897|158219	ABCA1|ABCA3|ACACB|APOC1|C3|CYP19A1|EDN1|IL1A|IL1B|IL6|LPL|NFKB1|NFKBIA|NKX3-1|PPARG|TNF|PTGES|IKBKE|ABCA7|SEC24A|EHD1|ACSL5|GHRL|ZC3H12A|EEPD1|C1QTNF1|TTC39B	-4.5	MyList
GO Biological Processes	19	GO:0070848	response to growth factor	19_GO:0050896 response to stimulus	-6.1	2.1	5.5	30211	493	1550	52	3.4	0.46	25|627|652|960|1906|2081|2247|2252|2321|2591|2619|3037|3309|3397|3576|3696|4093|4803|5156|5293|5371|5468|5606|5641|6347|6352|6591|6662|6935|7043|7133|7412|7422|7424|7474|8200|8828|8837|9314|9404|9863|10458|10938|11151|27006|27063|54541|54567|55553|79625|81792|285704	ABL1|BDNF|BMP4|CD44|EDN1|ERN1|FGF2|FGF7|FLT1|GALNT3|GAS1|HAS2|HSPA5|ID1|CXCL8|ITGB8|SMAD9|NGF|PDGFRA|PIK3CD|PML|PPARG|MAP2K3|LGMN|CCL2|CCL5|SNAI2|SOX9|ZEB1|TGFB3|TNFRSF1B|VCAM1|VEGFA|VEGFC|WNT5A|GDF5|NRP2|CFLAR|KLF4|LPXN|MAGI2|BAIAP2|EHD1|CORO1A|FGF22|ANKRD1|DDIT4|DLL4|SOX6|NDNF|ADAMTS12|RGMB	-4.5	MyList
GO Biological Processes	19	GO:0001755	neural crest cell migration	19_GO:0040011 locomotion	-6.1	4.8	6.7	30211	57	1550	14	0.9	0.24	1906|2637|2668|3091|3357|3911|6608|7869|8828|9464|10512|57715|64218|223117	EDN1|GBX2|GDNF|HIF1A|HTR2B|LAMA5|SMO|SEMA3B|NRP2|HAND2|SEMA3C|SEMA4G|SEMA4A|SEMA3D	-4.5	MyList
GO Biological Processes	19	GO:0070228	regulation of lymphocyte apoptotic process	19_GO:0050789 regulation of biological process	-6.1	4.8	6.7	30211	57	1550	14	0.9	0.24	652|972|1942|3091|3575|3620|3718|3965|4067|6352|7474|27086|29126|84941	BMP4|CD74|EFNA1|HIF1A|IL7R|IDO1|JAK3|LGALS9|LYN|CCL5|WNT5A|FOXP1|CD274|HSH2D	-4.5	MyList
GO Biological Processes	19	GO:0051047	positive regulation of secretion	19_GO:0051179 localization	-6.1	2.4	5.7	30211	300	1550	37	2.4	0.39	18|134|135|668|783|1080|1588|1906|2624|2668|2852|3091|3134|3552|3553|3623|3624|4824|4987|5021|5208|5468|5874|7043|7424|7494|8111|8564|8912|9536|10802|27063|28984|50855|51738|112755|114897	ABAT|ADORA1|ADORA2A|FOXL2|CACNB2|CFTR|CYP19A1|EDN1|GATA2|GDNF|GPER1|HIF1A|HLA-F|IL1A|IL1B|INHA|INHBA|NKX3-1|OPRL1|OXTR|PFKFB2|PPARG|RAB27B|TGFB3|VEGFC|XBP1|GPR68|KMO|CACNA1H|PTGES|SEC24A|ANKRD1|RGCC|PARD6A|GHRL|STX1B|C1QTNF1	-4.5	MyList
GO Biological Processes	19	GO:0050680	negative regulation of epithelial cell proliferation	19_GO:0048519 negative regulation of biological process	-6.1	3	6	30211	162	1550	25	1.6	0.32	367|634|652|1028|1948|2069|2321|3592|4163|4824|5468|6091|6347|6591|6662|6772|7026|7124|7421|7474|8200|28984|51738|54567|282679	AR|CEACAM1|BMP4|CDKN1C|EFNB2|EREG|FLT1|IL12A|MCC|NKX3-1|PPARG|ROBO1|CCL2|SNAI2|SOX9|STAT1|NR2F2|TNF|VDR|WNT5A|GDF5|RGCC|GHRL|DLL4|AQP11	-4.5	MyList
GO Biological Processes	19	GO:1901214	regulation of neuron death	19_GO:0050789 regulation of biological process	-6.1	2.4	5.7	30211	313	1550	38	2.5	0.39	25|134|135|627|947|1051|1435|1440|1948|2065|2149|2668|3091|3134|3672|4217|4803|5641|6347|6348|6352|6623|6648|7043|7124|7133|7474|8013|8200|8564|9244|10333|11151|22943|23321|54541|79625|135112	ABL1|ADORA1|ADORA2A|BDNF|CD34|CEBPB|CSF1|CSF3|EFNB2|ERBB3|F2R|GDNF|HIF1A|HLA-F|ITGA1|MAP3K5|NGF|LGMN|CCL2|CCL3|CCL5|SNCG|SOD2|TGFB3|TNF|TNFRSF1B|WNT5A|NR4A3|GDF5|KMO|CRLF1|TLR6|CORO1A|DKK1|TRIM2|DDIT4|NDNF|NCOA7	-4.5	MyList
WikiPathways	27	WP236	Adipogenesis		-6.1	3.3	6.1	30211	131	1550	22	1.4	0.3	196|652|1051|1052|1647|2308|2624|3091|3399|3569|3976|4023|5054|5468|6772|6773|6776|7025|7124|9021|10135|28999	AHR|BMP4|CEBPB|CEBPD|GADD45A|FOXO1|GATA2|HIF1A|ID3|IL6|LIF|LPL|SERPINE1|PPARG|STAT1|STAT2|STAT5A|NR2F1|TNF|SOCS3|NAMPT|KLF15	-4.4	MyList
GO Biological Processes	19	GO:0030193	regulation of blood coagulation	19_GO:0032501 multicellular organismal process	-6	4.4	6.5	30211	66	1550	15	0.97	0.25	18|634|947|1906|2149|2161|3818|5054|5055|5156|5270|5328|10019|84830|114897	ABAT|CEACAM1|CD34|EDN1|F2R|F12|KLKB1|SERPINE1|SERPINB2|PDGFRA|SERPINE2|PLAU|SH2B3|ADTRP|C1QTNF1	-4.4	MyList
WikiPathways	27	WP2374	Oncostatin M signaling pathway		-6	4.4	6.5	30211	66	1550	15	0.97	0.25	840|1051|3091|3718|3726|4312|4314|4790|4792|5054|6347|6772|7422|9021|9180	CASP7|CEBPB|HIF1A|JAK3|JUNB|MMP1|MMP3|NFKB1|NFKBIA|SERPINE1|CCL2|STAT1|VEGFA|SOCS3|OSMR	-4.4	MyList
Reactome Gene Sets	6	R-HSA-5668541	TNFR2 non-canonical NF-kB pathway		-6	3.6	6.2	30211	102	1550	19	1.2	0.28	329|330|3604|4050|4791|4982|5696|5698|5699|5721|5971|7124|7133|7292|8718|8784|8995|10673|60401	BIRC2|BIRC3|TNFRSF9|LTB|NFKB2|TNFRSF11B|PSMB8|PSMB9|PSMB10|PSME2|RELB|TNF|TNFRSF1B|TNFSF4|TNFRSF25|TNFRSF18|TNFSF18|TNFSF13B|EDA2R	-4.4	MyList
GO Biological Processes	19	GO:0030857	negative regulation of epithelial cell differentiation	19_GO:0032502 developmental process	-6	5.1	6.7	30211	50	1550	13	0.84	0.23	1903|2301|3204|3397|3552|4318|6608|6662|6772|6935|7422|28514|130497	S1PR3|FOXE3|HOXA7|ID1|IL1A|MMP9|SMO|SOX9|STAT1|ZEB1|VEGFA|DLL1|OSR1	-4.4	MyList
KEGG Pathway	24	hsa05145	Toxoplasmosis		-6	3.5	6.1	30211	112	1550	20	1.3	0.29	329|330|3112|3306|3460|3592|3655|3909|3911|3914|3918|4615|4790|4792|4793|5606|6772|7043|7124|10105	BIRC2|BIRC3|HLA-DOB|HSPA2|IFNGR2|IL12A|ITGA6|LAMA3|LAMA5|LAMB3|LAMC2|MYD88|NFKB1|NFKBIA|NFKBIB|MAP2K3|STAT1|TGFB3|TNF|PPIF	-4.4	MyList
WikiPathways	27	WP4969	RAS and bradykinin pathways in COVID-19		-6	6.7	7.2	30211	29	1550	10	0.65	0.2	623|624|2161|3552|3553|3818|4790|5054|7124|7421	BDKRB1|BDKRB2|F12|IL1A|IL1B|KLKB1|NFKB1|SERPINE1|TNF|VDR	-4.4	MyList
GO Biological Processes	19	GO:0072678	T cell migration	19_GO:0040011 locomotion	-6	6.7	7.2	30211	29	1550	10	0.65	0.2	1901|3383|3627|3695|5293|6347|6348|6364|6373|58191	S1PR1|ICAM1|CXCL10|ITGB7|PIK3CD|CCL2|CCL3|CCL20|CXCL11|CXCL16	-4.4	MyList
GO Biological Processes	19	GO:0032331	negative regulation of chondrocyte differentiation	19_GO:0032502 developmental process	-6	7.6	7.4	30211	23	1550	9	0.58	0.19	579|652|5744|5916|6591|6662|8200|81792|144347	NKX3-2|BMP4|PTHLH|RARG|SNAI2|SOX9|GDF5|ADAMTS12|RFLNA	-4.4	MyList
GO Biological Processes	19	GO:0002526	acute inflammatory response	19_GO:0050896 response to stimulus	-6	4.2	6.4	30211	75	1550	16	1	0.26	445|1051|2161|2683|3552|3553|3569|3818|5359|6288|6289|7124|7292|7412|8876|23780	ASS1|CEBPB|F12|B4GALT1|IL1A|IL1B|IL6|KLKB1|PLSCR1|SAA1|SAA2|TNF|TNFSF4|VCAM1|VNN1|APOL2	-4.4	MyList
GO Biological Processes	19	GO:0032760	positive regulation of tumor necrosis factor production	19_GO:0048518 positive regulation of biological process	-6	3.6	6.1	30211	103	1550	19	1.2	0.28	3133|3552|3569|3965|4023|4615|4938|4939|4940|5788|6348|7098|7474|7855|8767|23586|64135|90865|113277	HLA-E|IL1A|IL6|LGALS9|LPL|MYD88|OAS1|OAS2|OAS3|PTPRC|CCL3|TLR3|WNT5A|FZD5|RIPK2|DDX58|IFIH1|IL33|TMEM106A	-4.3	MyList
GO Biological Processes	19	GO:0045165	cell fate commitment	19_GO:0032502 developmental process	-5.9	2.6	5.7	30211	244	1550	32	2.1	0.36	639|652|1906|2114|2619|2624|2736|3084|3398|3569|3574|3714|4286|4654|5371|5468|6608|6662|6666|6911|7026|7474|7477|9314|9580|9760|23135|28514|54567|55553|55897|56833	PRDM1|BMP4|EDN1|ETS2|GAS1|GATA2|GLI2|NRG1|ID2|IL6|IL7|JAG2|MITF|MYOD1|PML|PPARG|SMO|SOX9|SOX12|TBX6|NR2F2|WNT5A|WNT7B|KLF4|SOX13|TOX|KDM6B|DLL1|DLL4|SOX6|MESP1|SLAMF8	-4.3	MyList
GO Biological Processes	19	GO:0048754	branching morphogenesis of an epithelial tube	19_GO:0032502 developmental process	-5.9	3.2	6	30211	133	1550	22	1.4	0.3	367|374|652|1435|1906|2247|2637|2668|2736|3202|3911|4323|4824|5087|5371|6662|7421|7422|7474|23129|54567|157506	AR|AREG|BMP4|CSF1|EDN1|FGF2|GBX2|GDNF|GLI2|HOXA5|LAMA5|MMP14|NKX3-1|PBX1|PML|SOX9|VDR|VEGFA|WNT5A|PLXND1|DLL4|RDH10	-4.3	MyList
GO Biological Processes	19	GO:0070304	positive regulation of stress-activated protein kinase signaling cascade	19_GO:0023052 signaling	-5.9	3.2	6	30211	133	1550	22	1.4	0.3	652|1647|3552|3553|4067|4217|4615|5610|7098|7124|7185|7422|7474|7477|8767|9464|23236|55504|60401|80149|153769|344558	BMP4|GADD45A|IL1A|IL1B|LYN|MAP3K5|MYD88|EIF2AK2|TLR3|TNF|TRAF1|VEGFA|WNT5A|WNT7B|RIPK2|HAND2|PLCB1|TNFRSF19|EDA2R|ZC3H12A|SH3RF2|SH3RF3	-4.3	MyList
GO Biological Processes	19	GO:1905332	positive regulation of morphogenesis of an epithelium	19_GO:0032502 developmental process	-5.9	6	6.9	30211	36	1550	11	0.71	0.21	25|367|652|2247|2668|2697|3976|5293|6608|6662|7422	ABL1|AR|BMP4|FGF2|GDNF|GJA1|LIF|PIK3CD|SMO|SOX9|VEGFA	-4.3	MyList
GO Biological Processes	19	GO:0060541	respiratory system development	19_GO:0032502 developmental process	-5.9	2.8	5.8	30211	198	1550	28	1.8	0.34	21|220|445|652|1116|2247|2252|2735|2736|3202|3290|3911|3976|4015|4321|4323|5156|5916|6662|7043|7422|7474|7477|9242|10409|91461|93649|157506	ABCA3|ALDH1A3|ASS1|BMP4|CHI3L1|FGF2|FGF7|GLI1|GLI2|HOXA5|HSD11B1|LAMA5|LIF|LOX|MMP12|MMP14|PDGFRA|RARG|SOX9|TGFB3|VEGFA|WNT5A|WNT7B|MSC|BASP1|PKDCC|MYOCD|RDH10	-4.3	MyList
GO Biological Processes	19	GO:0034330	cell junction organization	19_GO:0009987 cellular process	-5.9	2.1	5.4	30211	473	1550	50	3.2	0.45	88|421|627|718|783|784|999|1000|1008|1016|1308|1948|2049|2149|2668|2697|2823|3084|3655|4774|5364|5641|5800|6591|6623|7043|7474|7477|7855|8497|9722|10458|11187|22865|22866|22891|22943|23024|23129|27253|50855|55638|78999|80863|114798|145581|222256|347731|643866|100506658	ACTN2|ARVCF|BDNF|C3|CACNB2|CACNB3|CDH1|CDH2|CDH10|CDH18|COL17A1|EFNB2|EPHB3|F2R|GDNF|GJA1|GPM6A|NRG1|ITGA6|NFIA|PLXNB1|LGMN|PTPRO|SNAI2|SNCG|TGFB3|WNT5A|WNT7B|FZD5|PPFIA4|NOS1AP|BAIAP2|PKP3|SLITRK3|CNKSR2|ZNF365|DKK1|PDZRN3|PLXND1|PCDH17|PARD6A|SYBU|LRFN4|PRRT1|SLITRK1|LRFN5|CDHR3|LRRTM3|CBLN3|OCLN	-4.3	MyList
GO Biological Processes	19	GO:0009409	response to cold	19_GO:0050896 response to stimulus	-5.9	5	6.6	30211	51	1550	13	0.84	0.23	133|490|2308|2766|3306|3627|4023|4792|6648|7352|8989|9481|51316	ADM|ATP2B1|FOXO1|GMPR|HSPA2|CXCL10|LPL|NFKBIA|SOD2|UCP3|TRPA1|SLC25A27|PLAC8	-4.3	MyList
GO Biological Processes	19	GO:0060688	regulation of morphogenesis of a branching structure	19_GO:0032502 developmental process	-5.9	5	6.6	30211	51	1550	13	0.84	0.23	25|367|652|859|2252|2668|6474|6591|6608|6662|7124|7422|7474	ABL1|AR|BMP4|CAV3|FGF7|GDNF|SHOX2|SNAI2|SMO|SOX9|TNF|VEGFA|WNT5A	-4.3	MyList
GO Biological Processes	19	GO:0045926	negative regulation of growth	19_GO:0040007 growth	-5.9	2.5	5.6	30211	245	1550	32	2.1	0.36	623|652|684|859|1410|1594|2697|3091|3624|4489|4493|4499|4501|4502|5270|5371|5641|5997|5999|7474|7869|8835|10512|23251|23286|51316|57715|64218|65078|80128|87178|223117	BDKRB1|BMP4|BST2|CAV3|CRYAB|CYP27B1|GJA1|HIF1A|INHBA|MT1A|MT1E|MT1M|MT1X|MT2A|SERPINE2|PML|LGMN|RGS2|RGS4|WNT5A|SEMA3B|SOCS2|SEMA3C|MINAR1|WWC1|PLAC8|SEMA4G|SEMA4A|RTN4R|TRIM46|PNPT1|SEMA3D	-4.3	MyList
GO Biological Processes	19	GO:2000117	negative regulation of cysteine-type endopeptidase activity	19_GO:0048519 negative regulation of biological process	-5.9	3.9	6.2	30211	85	1550	17	1.1	0.26	135|329|330|960|1410|2537|3428|4318|5329|5743|6195|7124|7422|9314|25816|27074|114769	ADORA2A|BIRC2|BIRC3|CD44|CRYAB|IFI6|IFI16|MMP9|PLAUR|PTGS2|RPS6KA1|TNF|VEGFA|KLF4|TNFAIP8|LAMP3|CARD16	-4.3	MyList
GO Biological Processes	19	GO:0051271	negative regulation of cellular component movement	19_GO:0051179 localization	-5.9	2.2	5.5	30211	369	1550	42	2.7	0.41	134|684|972|999|1588|1634|1647|1803|2247|2697|3084|3204|4163|4223|4286|5054|5468|5734|5800|6091|6347|6672|6781|7026|7124|7130|9294|9314|9863|10014|11009|23236|23671|28984|29775|54567|56833|65009|84830|93649|114757|407006	ADORA1|BST2|CD74|CDH1|CYP19A1|DCN|GADD45A|DPP4|FGF2|GJA1|NRG1|HOXA7|MCC|MEOX2|MITF|SERPINE1|PPARG|PTGER4|PTPRO|ROBO1|CCL2|SP100|STC1|NR2F2|TNF|TNFAIP6|S1PR2|KLF4|MAGI2|HDAC5|IL24|PLCB1|TMEFF2|RGCC|CARD10|DLL4|SLAMF8|NDRG4|ADTRP|MYOCD|CYGB|MIR221	-4.3	MyList
GO Biological Processes	19	GO:0045137	development of primary sexual characteristics	19_GO:0022414 reproductive process	-5.9	2.6	5.7	30211	222	1550	30	1.9	0.35	367|668|1051|1588|2069|2697|3206|3309|3623|3624|3815|4323|4824|5156|5806|6662|6665|7026|7098|7130|7422|7474|8531|10184|10409|22836|56956|63951|130497|157506	AR|FOXL2|CEBPB|CYP19A1|EREG|GJA1|HOXA10|HSPA5|INHA|INHBA|KIT|MMP14|NKX3-1|PDGFRA|PTX3|SOX9|SOX15|NR2F2|TLR3|TNFAIP6|VEGFA|WNT5A|YBX3|LHFPL2|BASP1|RHOBTB3|LHX9|DMRTA1|OSR1|RDH10	-4.3	MyList
GO Biological Processes	19	GO:0060337	type I interferon signaling pathway	19_GO:0044419 biological process involved in interspecies interaction between organisms	-5.9	8.7	7.6	30211	18	1550	8	0.52	0.18	3455|3665|4615|4939|6672|6772|6773|11277	IFNAR2|IRF7|MYD88|OAS2|SP100|STAT1|STAT2|TREX1	-4.3	MyList
GO Biological Processes	19	GO:0002483	antigen processing and presentation of endogenous peptide antigen	19_GO:0002376 immune system process	-5.9	8.7	7.6	30211	18	1550	8	0.52	0.18	3106|3133|3134|6890|6891|6892|51752|64167	HLA-B|HLA-E|HLA-F|TAP1|TAP2|TAPBP|ERAP1|ERAP2	-4.3	MyList
GO Biological Processes	19	GO:1903034	regulation of response to wounding	19_GO:0050896 response to stimulus	-5.9	2.9	5.8	30211	166	1550	25	1.6	0.32	18|634|947|1839|1906|2149|2161|2247|3818|5054|5055|5156|5270|5328|7124|7128|7494|8613|9314|10019|65078|84830|114897|407006|100506658	ABAT|CEACAM1|CD34|HBEGF|EDN1|F2R|F12|FGF2|KLKB1|SERPINE1|SERPINB2|PDGFRA|SERPINE2|PLAU|TNF|TNFAIP3|XBP1|PLPP3|KLF4|SH2B3|RTN4R|ADTRP|C1QTNF1|MIR221|OCLN	-4.3	MyList
GO Biological Processes	19	GO:0048771	tissue remodeling	19_GO:0032501 multicellular organismal process	-5.9	3.7	6.1	30211	95	1550	18	1.2	0.27	1999|2149|2697|3091|3200|3351|3552|3574|3976|4286|4323|5745|7043|8200|10512|50507|54567|84870	ELF3|F2R|GJA1|HIF1A|HOXA3|HTR1B|IL1A|IL7|LIF|MITF|MMP14|PTH1R|TGFB3|GDF5|SEMA3C|NOX4|DLL4|RSPO3	-4.3	MyList
GO Biological Processes	19	GO:1900046	regulation of hemostasis	19_GO:0050789 regulation of biological process	-5.8	4.3	6.3	30211	68	1550	15	0.97	0.25	18|634|947|1906|2149|2161|3818|5054|5055|5156|5270|5328|10019|84830|114897	ABAT|CEACAM1|CD34|EDN1|F2R|F12|KLKB1|SERPINE1|SERPINB2|PDGFRA|SERPINE2|PLAU|SH2B3|ADTRP|C1QTNF1	-4.2	MyList
GO Biological Processes	19	GO:1904705	regulation of vascular associated smooth muscle cell proliferation	19_GO:0050789 regulation of biological process	-5.8	3.9	6.2	30211	86	1550	17	1.1	0.26	1906|2081|2247|2697|2852|3351|4217|4318|5468|6648|7043|7124|8013|8862|9294|93649|407006	EDN1|ERN1|FGF2|GJA1|GPER1|HTR1B|MAP3K5|MMP9|PPARG|SOD2|TGFB3|TNF|NR4A3|APLN|S1PR2|MYOCD|MIR221	-4.2	MyList
GO Biological Processes	19	GO:0043154	negative regulation of cysteine-type endopeptidase activity involved in apoptotic process	19_GO:0048519 negative regulation of biological process	-5.8	4.1	6.2	30211	77	1550	16	1	0.26	135|329|330|960|1410|2537|4318|5329|5743|6195|7124|7422|9314|25816|27074|114769	ADORA2A|BIRC2|BIRC3|CD44|CRYAB|IFI6|MMP9|PLAUR|PTGS2|RPS6KA1|TNF|VEGFA|KLF4|TNFAIP8|LAMP3|CARD16	-4.2	MyList
GO Biological Processes	19	GO:0043280	positive regulation of cysteine-type endopeptidase activity involved in apoptotic process	19_GO:0048518 positive regulation of biological process	-5.8	3.3	5.9	30211	125	1550	21	1.4	0.29	637|668|834|843|2149|2852|3965|4217|4824|5371|5468|6091|7023|7124|8743|8837|10017|55075|80758|83595|114548	BID|FOXL2|CASP1|CASP10|F2R|GPER1|LGALS9|MAP3K5|NKX3-1|PML|PPARG|ROBO1|TFAP4|TNF|TNFSF10|CFLAR|BCL2L10|UACA|PRR7|SOX7|NLRP3	-4.2	MyList
GO Biological Processes	19	GO:0048002	antigen processing and presentation of peptide antigen	19_GO:0002376 immune system process	-5.8	4.5	6.4	30211	60	1550	14	0.9	0.24	972|1520|2207|3106|3112|3133|3134|5641|6890|6891|6892|10437|51752|64167	CD74|CTSS|FCER1G|HLA-B|HLA-DOB|HLA-E|HLA-F|LGMN|TAP1|TAP2|TAPBP|IFI30|ERAP1|ERAP2	-4.2	MyList
KEGG Pathway	24	hsa05143	African trypanosomiasis		-5.8	5.8	6.8	30211	37	1550	11	0.71	0.21	3383|3553|3569|3592|3620|4615|5330|7124|7412|8542|23236	ICAM1|IL1B|IL6|IL12A|IDO1|MYD88|PLCB2|TNF|VCAM1|APOL1|PLCB1	-4.2	MyList
GO Biological Processes	19	GO:0046640	regulation of alpha-beta T cell proliferation	19_GO:0002376 immune system process	-5.8	5.8	6.8	30211	37	1550	11	0.71	0.21	868|3133|3659|3965|5788|7292|8767|10148|26191|29126|64115	CBLB|HLA-E|IRF1|LGALS9|PTPRC|TNFSF4|RIPK2|EBI3|PTPN22|CD274|VSIR	-4.2	MyList
GO Biological Processes	19	GO:0031663	lipopolysaccharide-mediated signaling pathway	19_GO:0044419 biological process involved in interspecies interaction between organisms	-5.8	5.8	6.8	30211	37	1550	11	0.71	0.21	3553|3656|4067|4615|4792|6347|6348|6352|7124|8767|26191	IL1B|IRAK2|LYN|MYD88|NFKBIA|CCL2|CCL3|CCL5|TNF|RIPK2|PTPN22	-4.2	MyList
KEGG Pathway	24	hsa05160	Hepatitis C		-5.8	3	5.8	30211	157	1550	24	1.5	0.31	637|3434|3455|3627|3665|4599|4600|4790|4792|4938|4939|4940|5293|5610|6772|6773|7098|7124|8837|9021|9641|23586|91543|100506658	BID|IFIT1|IFNAR2|CXCL10|IRF7|MX1|MX2|NFKB1|NFKBIA|OAS1|OAS2|OAS3|PIK3CD|EIF2AK2|STAT1|STAT2|TLR3|TNF|CFLAR|SOCS3|IKBKE|DDX58|RSAD2|OCLN	-4.2	MyList
Reactome Gene Sets	6	R-HSA-168898	Toll-like Receptor Cascades		-5.8	3	5.8	30211	157	1550	24	1.5	0.31	329|330|1326|1520|1759|1846|3656|3665|4615|4790|4791|4792|4793|5606|5641|6195|6288|7098|8767|9641|10333|51284|81622|257397	BIRC2|BIRC3|MAP3K8|CTSS|DNM1|DUSP4|IRAK2|IRF7|MYD88|NFKB1|NFKB2|NFKBIA|NFKBIB|MAP2K3|LGMN|RPS6KA1|SAA1|TLR3|RIPK2|IKBKE|TLR6|TLR7|UNC93B1|TAB3	-4.2	MyList
GO Biological Processes	19	GO:0006469	negative regulation of protein kinase activity	19_GO:0048519 negative regulation of biological process	-5.8	2.7	5.6	30211	213	1550	29	1.9	0.34	25|103|135|634|652|859|868|1028|1647|3553|4067|5468|5788|5794|5800|5997|7023|7026|7128|7453|9052|10019|10636|26191|28951|79007|93649|124790|374462	ABL1|ADAR|ADORA2A|CEACAM1|BMP4|CAV3|CBLB|CDKN1C|GADD45A|IL1B|LYN|PPARG|PTPRC|PTPRH|PTPRO|RGS2|TFAP4|NR2F2|TNFAIP3|WARS1|GPRC5A|SH2B3|RGS14|PTPN22|TRIB2|DBNDD1|MYOCD|HEXIM2|PTPRQ	-4.2	MyList
GO Biological Processes	19	GO:0048705	skeletal system morphogenesis	19_GO:0032502 developmental process	-5.8	2.6	5.6	30211	225	1550	30	1.9	0.35	579|652|3037|3198|3200|3201|3202|3203|3204|3205|3215|3221|3235|4323|4664|5156|5916|6474|6662|6781|6935|7043|9249|55553|64651|85301|116039|130497|144347|157506	NKX3-2|BMP4|HAS2|HOXA1|HOXA3|HOXA4|HOXA5|HOXA6|HOXA7|HOXA9|HOXB5|HOXC4|HOXD9|MMP14|NAB1|PDGFRA|RARG|SHOX2|SOX9|STC1|ZEB1|TGFB3|DHRS3|SOX6|CSRNP1|COL27A1|OSR2|OSR1|RFLNA|RDH10	-4.2	MyList
GO Biological Processes	19	GO:0002573	myeloid leukocyte differentiation	19_GO:0002376 immune system process	-5.8	3.4	5.9	30211	116	1550	20	1.3	0.29	652|861|1435|1437|1440|2624|3428|3696|3726|3815|4286|4318|5293|5468|5971|7124|7422|27086|55509|116071	BMP4|RUNX1|CSF1|CSF2|CSF3|GATA2|IFI16|ITGB8|JUNB|KIT|MITF|MMP9|PIK3CD|PPARG|RELB|TNF|VEGFA|FOXP1|BATF3|BATF2	-4.2	MyList
GO Biological Processes	19	GO:2000146	negative regulation of cell motility	19_GO:0040011 locomotion	-5.7	2.2	5.4	30211	361	1550	41	2.6	0.41	134|684|972|999|1588|1634|1647|1803|2247|2697|3084|3204|4163|4223|4286|5054|5468|5734|6091|6347|6672|6781|7026|7124|7130|9294|9314|9863|10014|11009|23236|23671|28984|29775|54567|56833|65009|84830|93649|114757|407006	ADORA1|BST2|CD74|CDH1|CYP19A1|DCN|GADD45A|DPP4|FGF2|GJA1|NRG1|HOXA7|MCC|MEOX2|MITF|SERPINE1|PPARG|PTGER4|ROBO1|CCL2|SP100|STC1|NR2F2|TNF|TNFAIP6|S1PR2|KLF4|MAGI2|HDAC5|IL24|PLCB1|TMEFF2|RGCC|CARD10|DLL4|SLAMF8|NDRG4|ADTRP|MYOCD|CYGB|MIR221	-4.2	MyList
WikiPathways	27	WP98	Prostaglandin synthesis and regulation		-5.7	5.2	6.6	30211	45	1550	12	0.77	0.22	231|1583|1906|3290|4286|5468|5732|5734|5739|5743|6662|9536	AKR1B1|CYP11A1|EDN1|HSD11B1|MITF|PPARG|PTGER2|PTGER4|PTGIR|PTGS2|SOX9|PTGES	-4.1	MyList
GO Biological Processes	19	GO:0008277	regulation of G protein-coupled receptor signaling pathway	19_GO:0023052 signaling	-5.7	3.1	5.8	30211	137	1550	22	1.4	0.3	133|718|1906|2852|2869|3351|3357|3576|4987|5142|5997|5999|6352|8601|8786|8862|9397|10636|11343|23236|23516|57561	ADM|C3|EDN1|GPER1|GRK5|HTR1B|HTR2B|CXCL8|OPRL1|PDE4B|RGS2|RGS4|CCL5|RGS20|RGS11|APLN|NMT2|RGS14|MGLL|PLCB1|SLC39A14|ARRDC3	-4.1	MyList
GO Biological Processes	19	GO:1903532	positive regulation of secretion by cell	19_GO:0051179 localization	-5.7	2.4	5.5	30211	274	1550	34	2.2	0.37	18|135|668|783|1080|1588|1906|2624|2668|2852|3091|3134|3552|3553|3623|3624|4824|5021|5208|5468|5874|7043|7424|8111|8564|8912|9536|10802|27063|28984|50855|51738|112755|114897	ABAT|ADORA2A|FOXL2|CACNB2|CFTR|CYP19A1|EDN1|GATA2|GDNF|GPER1|HIF1A|HLA-F|IL1A|IL1B|INHA|INHBA|NKX3-1|OXTR|PFKFB2|PPARG|RAB27B|TGFB3|VEGFC|GPR68|KMO|CACNA1H|PTGES|SEC24A|ANKRD1|RGCC|PARD6A|GHRL|STX1B|C1QTNF1	-4.1	MyList
Reactome Gene Sets	6	R-HSA-2022090	Assembly of collagen fibrils and other multimeric structures		-5.7	4.5	6.3	30211	61	1550	14	0.9	0.24	1294|1300|1308|1520|3655|3909|3914|3918|4015|4314|4318|7092|85301|255631	COL7A1|COL10A1|COL17A1|CTSS|ITGA6|LAMA3|LAMB3|LAMC2|LOX|MMP3|MMP9|TLL1|COL27A1|COL24A1	-4.1	MyList
GO Biological Processes	19	GO:0007610	behavior	19_GO:0007610 behavior	-5.7	1.9	5.2	30211	563	1550	56	3.6	0.47	18|25|135|220|627|885|1051|1803|1827|2115|2668|2925|3084|3091|3198|3235|3351|3357|3398|3620|3815|4130|4160|4211|4803|4891|4987|5021|5641|5743|6326|6335|6506|6623|6648|8528|8862|9099|9464|10347|10636|10769|22943|23236|23551|27253|51738|57731|63951|65009|80863|81832|84630|84879|114798|116372	ABAT|ABL1|ADORA2A|ALDH1A3|BDNF|CCK|CEBPB|DPP4|RCAN1|ETV1|GDNF|GRPR|NRG1|HIF1A|HOXA1|HOXD9|HTR1B|HTR2B|ID2|IDO1|KIT|MAP1A|MC4R|MEIS1|NGF|SLC11A2|OPRL1|OXTR|LGMN|PTGS2|SCN2A|SCN9A|SLC1A2|SNCG|SOD2|DDO|APLN|USP2|HAND2|ABCA7|RGS14|PLK2|DKK1|PLCB1|RASD2|PCDH17|GHRL|SPTBN4|DMRTA1|NDRG4|PRRT1|NETO1|TTBK1|MFSD2A|SLITRK1|LYPD1	-4.1	MyList
WikiPathways	27	WP1533	Vitamin B12 metabolism		-5.7	4.8	6.4	30211	53	1550	13	0.84	0.23	19|3383|3553|3569|4790|4791|5054|6288|6289|6347|6352|6648|7124	ABCA1|ICAM1|IL1B|IL6|NFKB1|NFKB2|SERPINE1|SAA1|SAA2|CCL2|CCL5|SOD2|TNF	-4.1	MyList
GO Biological Processes	19	GO:1903557	positive regulation of tumor necrosis factor superfamily cytokine production	19_GO:0048518 positive regulation of biological process	-5.7	3.5	5.9	30211	107	1550	19	1.2	0.28	3133|3552|3569|3965|4023|4615|4938|4939|4940|5788|6348|7098|7474|7855|8767|23586|64135|90865|113277	HLA-E|IL1A|IL6|LGALS9|LPL|MYD88|OAS1|OAS2|OAS3|PTPRC|CCL3|TLR3|WNT5A|FZD5|RIPK2|DDX58|IFIH1|IL33|TMEM106A	-4.1	MyList
GO Biological Processes	19	GO:0045861	negative regulation of proteolysis	19_GO:0048519 negative regulation of biological process	-5.7	2.2	5.4	30211	350	1550	40	2.6	0.4	135|329|330|684|718|960|1294|1410|1942|2537|2619|3053|3428|3699|4130|4318|4803|5054|5055|5270|5271|5329|5371|5743|5918|6195|6318|6737|7124|7422|7980|9314|25816|27074|89932|114769|282679|327657|653145|728113	ADORA2A|BIRC2|BIRC3|BST2|C3|CD44|COL7A1|CRYAB|EFNA1|IFI6|GAS1|SERPIND1|IFI16|ITIH3|MAP1A|MMP9|NGF|SERPINE1|SERPINB2|SERPINE2|SERPINB8|PLAUR|PML|PTGS2|RARRES1|RPS6KA1|SERPINB4|TRIM21|TNF|VEGFA|TFPI2|KLF4|TNFAIP8|LAMP3|PAPLN|CARD16|AQP11|SERPINA9|ANXA8|ANXA8L1	-4.1	MyList
GO Biological Processes	19	GO:0002709	regulation of T cell mediated immunity	19_GO:0002376 immune system process	-5.7	3.8	6	30211	88	1550	17	1.1	0.26	196|634|3106|3133|3134|3553|3569|3575|3592|3594|5788|7133|7292|7855|91543|114548|259307	AHR|CEACAM1|HLA-B|HLA-E|HLA-F|IL1B|IL6|IL7R|IL12A|IL12RB1|PTPRC|TNFRSF1B|TNFSF4|FZD5|RSAD2|NLRP3|IL4I1	-4.1	MyList
GO Biological Processes	19	GO:0043491	protein kinase B signaling	19_GO:0023052 signaling	-5.7	5.6	6.7	30211	38	1550	11	0.71	0.21	1263|3553|4015|4824|6347|6348|6352|6662|7124|84830|375033	PLK3|IL1B|LOX|NKX3-1|CCL2|CCL3|CCL5|SOX9|TNF|ADTRP|PEAR1	-4.1	MyList
GO Biological Processes	19	GO:0003018	vascular process in circulatory system	19_GO:0032501 multicellular organismal process	-5.7	2.4	5.5	30211	263	1550	33	2.1	0.37	25|133|134|135|146|490|624|634|1906|2149|2643|2852|3177|3351|3357|3672|3764|5021|5743|5997|6506|6513|6542|6565|6580|6648|7124|7422|54407|80852|84879|143282|100506658	ABL1|ADM|ADORA1|ADORA2A|ADRA1D|ATP2B1|BDKRB2|CEACAM1|EDN1|F2R|GCH1|GPER1|SLC29A2|HTR1B|HTR2B|ITGA1|KCNJ8|OXTR|PTGS2|RGS2|SLC1A2|SLC2A1|SLC7A2|SLC15A2|SLC22A1|SOD2|TNF|VEGFA|SLC38A2|GRIP2|MFSD2A|FGFBP3|OCLN	-4.1	MyList
GO Biological Processes	19	GO:0071260	cellular response to mechanical stimulus	19_GO:0050896 response to stimulus	-5.7	4.2	6.2	30211	70	1550	15	0.97	0.25	834|1647|3553|3659|4615|4790|5734|5743|6513|6662|7098|8795|27063|51284|54407	CASP1|GADD45A|IL1B|IRF1|MYD88|NFKB1|PTGER4|PTGS2|SLC2A1|SOX9|TLR3|TNFRSF10B|ANKRD1|TLR7|SLC38A2	-4.1	MyList
GO Biological Processes	19	GO:1901184	regulation of ERBB signaling pathway	19_GO:0023052 signaling	-5.7	3.9	6.1	30211	79	1550	16	1	0.26	134|374|634|685|868|1839|2069|2537|2852|3672|4318|5329|5641|9052|79628|79651	ADORA1|AREG|CEACAM1|BTC|CBLB|HBEGF|EREG|IFI6|GPER1|ITGA1|MMP9|PLAUR|LGMN|GPRC5A|SH3TC2|RHBDF2	-4.1	MyList
Reactome Gene Sets	6	R-HSA-416476	G alpha (q) signalling events		-5.7	2.6	5.5	30211	216	1550	29	1.9	0.34	146|623|624|885|1607|1839|1906|2149|2151|2769|2863|2869|2925|3357|3709|4314|5021|5330|5997|5999|6195|6288|7225|8111|9162|10235|11343|23236|51738	ADRA1D|BDKRB1|BDKRB2|CCK|DGKB|HBEGF|EDN1|F2R|F2RL2|GNA15|GPR39|GRK5|GRPR|HTR2B|ITPR2|MMP3|OXTR|PLCB2|RGS2|RGS4|RPS6KA1|SAA1|TRPC6|GPR68|DGKI|RASGRP2|MGLL|PLCB1|GHRL	-4.1	MyList
GO Biological Processes	19	GO:0009991	response to extracellular stimulus	19_GO:0050896 response to stimulus	-5.6	2	5.2	30211	470	1550	49	3.2	0.44	32|133|360|445|467|490|1594|2308|3309|3428|3552|3627|4023|4067|4160|4217|4654|4982|5468|5563|5610|5743|5788|6506|6513|6648|6751|6772|6781|6935|7124|7352|7378|7412|7421|7494|7706|7942|8942|27141|51738|54407|80149|81788|84879|90226|93649|154743|168620	ACACB|ADM|AQP3|ASS1|ATF3|ATP2B1|CYP27B1|FOXO1|HSPA5|IFI16|IL1A|CXCL10|LPL|LYN|MC4R|MAP3K5|MYOD1|TNFRSF11B|PPARG|PRKAA2|EIF2AK2|PTGS2|PTPRC|SLC1A2|SLC2A1|SOD2|SSTR1|STAT1|STC1|ZEB1|TNF|UCP3|UPP1|VCAM1|VDR|XBP1|TRIM25|TFEB|KYNU|CIDEB|GHRL|SLC38A2|ZC3H12A|NUAK2|MFSD2A|UCN2|MYOCD|BMT2|BHLHA15	-4.1	MyList
GO Biological Processes	19	GO:0000165	MAPK cascade	19_GO:0023052 signaling	-5.6	2.8	5.6	30211	182	1550	26	1.7	0.33	1326|1410|1906|3084|3357|3553|3965|4155|4217|4615|4790|5021|5606|5734|6347|6348|6352|6662|7098|7124|7474|8767|51284|55504|84451|197259	MAP3K8|CRYAB|EDN1|NRG1|HTR2B|IL1B|LGALS9|MBP|MAP3K5|MYD88|NFKB1|OXTR|MAP2K3|PTGER4|CCL2|CCL3|CCL5|SOX9|TLR3|TNF|WNT5A|RIPK2|TLR7|TNFRSF19|MAP3K21|MLKL	-4.1	MyList
GO Biological Processes	19	GO:0034762	regulation of transmembrane transport	19_GO:0051179 localization	-5.6	1.9	5.2	30211	580	1550	57	3.7	0.48	25|88|623|718|783|784|825|859|1080|1520|1906|2149|2697|2852|3099|3306|3460|3553|3627|3755|3764|3772|3781|3787|4067|4318|4987|5142|5997|5999|6236|6326|6335|6347|6373|6506|7124|7225|7779|8013|8912|9022|9722|10105|11151|23072|28999|51703|55022|57463|57520|80863|81832|130497|154043|338440|100506658	ABL1|ACTN2|BDKRB1|C3|CACNB2|CACNB3|CAPN3|CAV3|CFTR|CTSS|EDN1|F2R|GJA1|GPER1|HK2|HSPA2|IFNGR2|IL1B|CXCL10|KCNG1|KCNJ8|KCNJ15|KCNN2|KCNS1|LYN|MMP9|OPRL1|PDE4B|RGS2|RGS4|RRAD|SCN2A|SCN9A|CCL2|CXCL11|SLC1A2|TNF|TRPC6|SLC30A1|NR4A3|CACNA1H|CLIC3|NOS1AP|PPIF|CORO1A|HECW1|KLF15|ACSL5|PID1|AMIGO1|HECW2|PRRT1|NETO1|OSR1|CNKSR3|ANO9|OCLN	-4.1	MyList
WikiPathways	27	WP2865	IL1 and megakaryocytes in obesity		-5.6	7	7	30211	25	1550	9	0.58	0.19	1839|2149|3383|3553|4318|4615|4790|6347|114548	HBEGF|F2R|ICAM1|IL1B|MMP9|MYD88|NFKB1|CCL2|NLRP3	-4.1	MyList
GO Biological Processes	19	GO:0019883	antigen processing and presentation of endogenous antigen	19_GO:0002376 immune system process	-5.6	7	7	30211	25	1550	9	0.58	0.19	972|3106|3133|3134|6890|6891|6892|51752|64167	CD74|HLA-B|HLA-E|HLA-F|TAP1|TAP2|TAPBP|ERAP1|ERAP2	-4.1	MyList
GO Biological Processes	19	GO:0032757	positive regulation of interleukin-8 production	19_GO:0048518 positive regulation of biological process	-5.6	4.4	6.2	30211	62	1550	14	0.9	0.24	972|1116|2149|3553|3569|3965|4615|5054|7098|7124|7474|23586|51284|338322	CD74|CHI3L1|F2R|IL1B|IL6|LGALS9|MYD88|SERPINE1|TLR3|TNF|WNT5A|DDX58|TLR7|NLRP10	-4.1	MyList
Canonical Pathways	11	M54	PID IL12 2PATHWAY		-5.6	4.4	6.2	30211	62	1550	14	0.9	0.24	3142|3553|3592|3594|4790|4791|5606|5971|6348|6351|6772|6775|6776|8767	HLX|IL1B|IL12A|IL12RB1|NFKB1|NFKB2|MAP2K3|RELB|CCL3|CCL4|STAT1|STAT4|STAT5A|RIPK2	-4.1	MyList
GO Biological Processes	19	GO:0008406	gonad development	19_GO:0022414 reproductive process	-5.6	2.6	5.5	30211	217	1550	29	1.9	0.34	367|668|1051|1588|2069|2697|3206|3309|3623|3624|3815|4323|4824|5156|5806|6662|6665|7026|7098|7130|7422|7474|8531|10409|22836|56956|63951|130497|157506	AR|FOXL2|CEBPB|CYP19A1|EREG|GJA1|HOXA10|HSPA5|INHA|INHBA|KIT|MMP14|NKX3-1|PDGFRA|PTX3|SOX9|SOX15|NR2F2|TLR3|TNFAIP6|VEGFA|WNT5A|YBX3|BASP1|RHOBTB3|LHX9|DMRTA1|OSR1|RDH10	-4	MyList
GO Biological Processes	19	GO:0010830	regulation of myotube differentiation	19_GO:0032502 developmental process	-5.6	5.1	6.4	30211	46	1550	12	0.77	0.22	627|859|4323|4654|6474|7494|9734|10014|79365|93649|168620|284358	BDNF|CAV3|MMP14|MYOD1|SHOX2|XBP1|HDAC9|HDAC5|BHLHE41|MYOCD|BHLHA15|MAMSTR	-4	MyList
GO Biological Processes	19	GO:0044070	regulation of anion transport	19_GO:0051179 localization	-5.6	3.7	6	30211	89	1550	17	1.1	0.26	18|134|135|1051|1080|1906|3351|3552|3553|5205|5997|5999|6781|7124|8564|9536|338440	ABAT|ADORA1|ADORA2A|CEBPB|CFTR|EDN1|HTR1B|IL1A|IL1B|ATP8B1|RGS2|RGS4|STC1|TNF|KMO|PTGES|ANO9	-4	MyList
GO Biological Processes	19	GO:1903035	negative regulation of response to wounding	19_GO:0048519 negative regulation of biological process	-5.6	3.7	6	30211	89	1550	17	1.1	0.26	18|634|947|1906|2161|2247|3818|5054|5055|5156|5270|5328|7124|10019|65078|84830|114897	ABAT|CEACAM1|CD34|EDN1|F12|FGF2|KLKB1|SERPINE1|SERPINB2|PDGFRA|SERPINE2|PLAU|TNF|SH2B3|RTN4R|ADTRP|C1QTNF1	-4	MyList
WikiPathways	27	WP2328	Allograft Rejection		-5.6	3.7	6	30211	89	1550	17	1.1	0.26	717|718|840|2668|3106|3112|3133|3134|3552|3553|3576|3592|5156|6373|6772|7124|7422	C2|C3|CASP7|GDNF|HLA-B|HLA-DOB|HLA-E|HLA-F|IL1A|IL1B|CXCL8|IL12A|PDGFRA|CXCL11|STAT1|TNF|VEGFA	-4	MyList
Reactome Gene Sets	6	R-HSA-1169410	Antiviral mechanism by IFN-stimulated genes		-5.6	3.9	6	30211	80	1550	16	1	0.26	3434|4599|4600|4938|4939|4940|5610|6772|7318|7706|8638|9246|9636|11274|23586|51191	IFIT1|MX1|MX2|OAS1|OAS2|OAS3|EIF2AK2|STAT1|UBA7|TRIM25|OASL|UBE2L6|ISG15|USP18|DDX58|HERC5	-4	MyList
GO Biological Processes	19	GO:0051146	striated muscle cell differentiation	19_GO:0032502 developmental process	-5.6	2.7	5.5	30211	195	1550	27	1.7	0.33	88|607|652|825|859|1000|1827|3084|3481|3880|4654|5156|5239|6474|6608|7422|7504|8837|8912|10324|23135|25802|27063|50507|55897|80206|93649	ACTN2|BCL9|BMP4|CAPN3|CAV3|CDH2|RCAN1|NRG1|IGF2|KRT19|MYOD1|PDGFRA|PGM5|SHOX2|SMO|VEGFA|XK|CFLAR|CACNA1H|KLHL41|KDM6B|LMOD1|ANKRD1|NOX4|MESP1|FHOD3|MYOCD	-4	MyList
GO Biological Processes	19	GO:0030098	lymphocyte differentiation	19_GO:0002376 immune system process	-5.6	2.5	5.4	30211	254	1550	32	2.1	0.36	25|972|2207|3569|3574|3575|3589|3659|3714|3718|3815|4189|5087|5293|5734|5788|5971|7412|7855|9580|9734|9760|10014|10673|26191|27086|28514|54567|56833|64218|80758|91543	ABL1|CD74|FCER1G|IL6|IL7|IL7R|IL11|IRF1|JAG2|JAK3|KIT|DNAJB9|PBX1|PIK3CD|PTGER4|PTPRC|RELB|VCAM1|FZD5|SOX13|HDAC9|TOX|HDAC5|TNFSF13B|PTPN22|FOXP1|DLL1|DLL4|SLAMF8|SEMA4A|PRR7|RSAD2	-4	MyList
Reactome Gene Sets	6	R-HSA-1474228	Degradation of the extracellular matrix		-5.6	3.1	5.7	30211	140	1550	22	1.4	0.3	825|960|999|1294|1300|1308|1520|1634|2006|3818|3909|3911|3914|3918|4312|4314|4318|4319|4320|4321|4323|7092	CAPN3|CD44|CDH1|COL7A1|COL10A1|COL17A1|CTSS|DCN|ELN|KLKB1|LAMA3|LAMA5|LAMB3|LAMC2|MMP1|MMP3|MMP9|MMP10|MMP11|MMP12|MMP14|TLL1	-4	MyList
GO Biological Processes	19	GO:0050921	positive regulation of chemotaxis	19_GO:0040011 locomotion	-5.6	3.1	5.7	30211	140	1550	22	1.4	0.3	719|972|1435|1901|1906|2247|3569|3576|3592|3627|3965|5054|5641|6348|6351|6352|6354|7422|7424|7474|23604|146433	C3AR1|CD74|CSF1|S1PR1|EDN1|FGF2|IL6|CXCL8|IL12A|CXCL10|LGALS9|SERPINE1|LGMN|CCL3|CCL4|CCL5|CCL7|VEGFA|VEGFC|WNT5A|DAPK2|IL34	-4	MyList
GO Biological Processes	19	GO:0030522	intracellular receptor signaling pathway	19_GO:0023052 signaling	-5.6	3.1	5.7	30211	140	1550	22	1.4	0.3	196|367|1540|2852|3665|4792|4824|4940|5371|5468|5916|7025|7026|7128|7421|8013|8767|23586|55809|64135|92610|144811	AHR|AR|CYLD|GPER1|IRF7|NFKBIA|NKX3-1|OAS3|PML|PPARG|RARG|NR2F1|NR2F2|TNFAIP3|VDR|NR4A3|RIPK2|DDX58|TRERF1|IFIH1|TIFA|LACC1	-4	MyList
WikiPathways	27	WP3893	Development and heterogeneity of the ILC family		-5.6	6.1	6.7	30211	32	1550	10	0.65	0.2	196|374|3398|3553|3569|3574|3592|7124|9760|90865	AHR|AREG|ID2|IL1B|IL6|IL7|IL12A|TNF|TOX|IL33	-4	MyList
GO Biological Processes	19	GO:0071470	cellular response to osmotic stress	19_GO:0050896 response to stimulus	-5.6	6.1	6.7	30211	32	1550	10	0.65	0.2	231|825|5743|5971|6326|6513|8531|80131|83959|92241	AKR1B1|CAPN3|PTGS2|RELB|SCN2A|SLC2A1|YBX3|LRRC8E|SLC4A11|RCSD1	-4	MyList
GO Biological Processes	19	GO:0050673	epithelial cell proliferation	19_GO:0009987 cellular process	-5.5	3.7	5.9	30211	90	1550	17	1.1	0.26	374|652|947|1051|2069|2081|3398|3569|3815|4323|4824|6195|6662|7124|7474|26298|168667	AREG|BMP4|CD34|CEBPB|EREG|ERN1|ID2|IL6|KIT|MMP14|NKX3-1|RPS6KA1|SOX9|TNF|WNT5A|EHF|BMPER	-4	MyList
GO Biological Processes	19	GO:0061097	regulation of protein tyrosine kinase activity	19_GO:0008152 metabolic process	-5.5	3.7	5.9	30211	90	1550	17	1.1	0.26	134|374|685|868|1839|1942|2065|2069|3084|4739|5788|6352|9052|50507|51704|51738|146433	ADORA1|AREG|BTC|CBLB|HBEGF|EFNA1|ERBB3|EREG|NRG1|NEDD9|PTPRC|CCL5|GPRC5A|NOX4|GPRC5B|GHRL|IL34	-4	MyList
WikiPathways	27	WP706	Sudden infant death syndrome (SIDS) susceptibility pathways		-5.5	2.9	5.6	30211	162	1550	24	1.5	0.31	367|627|859|1051|1129|2624|2697|3091|3552|3553|3569|3576|3764|4790|4791|4803|4824|5087|5452|6751|7124|7422|9722|9734	AR|BDNF|CAV3|CEBPB|CHRM2|GATA2|GJA1|HIF1A|IL1A|IL1B|IL6|CXCL8|KCNJ8|NFKB1|NFKB2|NGF|NKX3-1|PBX1|POU2F2|SSTR1|TNF|VEGFA|NOS1AP|HDAC9	-4	MyList
GO Biological Processes	19	GO:0032655	regulation of interleukin-12 production	19_GO:0032501 multicellular organismal process	-5.5	4.3	6.2	30211	63	1550	14	0.9	0.24	961|3106|3620|3659|3663|3718|3965|4050|4790|7098|7292|8767|23236|27086	CD47|HLA-B|IDO1|IRF1|IRF5|JAK3|LGALS9|LTB|NFKB1|TLR3|TNFSF4|RIPK2|PLCB1|FOXP1	-4	MyList
WikiPathways	27	WP4787	Osteoblast differentiation and related diseases		-5.5	3.2	5.7	30211	120	1550	20	1.3	0.29	652|2247|2252|2535|2736|3714|4093|4654|5287|5293|5468|6608|6662|6772|7474|7477|7855|23462|28514|54567	BMP4|FGF2|FGF7|FZD2|GLI2|JAG2|SMAD9|MYOD1|PIK3C2B|PIK3CD|PPARG|SMO|SOX9|STAT1|WNT5A|WNT7B|FZD5|HEY1|DLL1|DLL4	-4	MyList
GO Biological Processes	19	GO:0002702	positive regulation of production of molecular mediator of immune response	19_GO:0002376 immune system process	-5.5	3.2	5.7	30211	120	1550	20	1.3	0.29	972|3133|3134|3553|3569|3815|4189|5788|7292|7474|7494|7855|8013|23586|26191|51704|91543|114548|117854|144811	CD74|HLA-E|HLA-F|IL1B|IL6|KIT|DNAJB9|PTPRC|TNFSF4|WNT5A|XBP1|FZD5|NR4A3|DDX58|PTPN22|GPRC5B|RSAD2|NLRP3|TRIM6|LACC1	-4	MyList
GO Biological Processes	19	GO:0002824	positive regulation of adaptive immune response based on somatic recombination of immune receptors built from immunoglobulin superfamily domains	19_GO:0002376 immune system process	-5.5	3.4	5.8	30211	110	1550	19	1.2	0.28	718|3106|3133|3134|3553|3569|3592|3594|5788|7124|7292|7855|8767|10673|29126|64332|91543|114548|338322	C3|HLA-B|HLA-E|HLA-F|IL1B|IL6|IL12A|IL12RB1|PTPRC|TNF|TNFSF4|FZD5|RIPK2|TNFSF13B|CD274|NFKBIZ|RSAD2|NLRP3|NLRP10	-4	MyList
GO Biological Processes	19	GO:1901222	regulation of NIK/NF-kappaB signaling	19_GO:0023052 signaling	-5.5	3.4	5.8	30211	110	1550	19	1.2	0.28	329|1540|1906|3430|3553|3965|4792|5610|7098|7124|9111|10616|26191|51284|55075|56892|80149|114548|219790	BIRC2|CYLD|EDN1|IFI35|IL1B|LGALS9|NFKBIA|EIF2AK2|TLR3|TNF|NMI|RBCK1|PTPN22|TLR7|UACA|TCIM|ZC3H12A|NLRP3|RTKN2	-4	MyList
GO Biological Processes	19	GO:0002673	regulation of acute inflammatory response	19_GO:0050896 response to stimulus	-5.5	5	6.3	30211	47	1550	12	0.77	0.22	134|718|2161|3133|3553|3569|3818|5743|7124|9180|9536|114548	ADORA1|C3|F12|HLA-E|IL1B|IL6|KLKB1|PTGS2|TNF|OSMR|PTGES|NLRP3	-3.9	MyList
WikiPathways	27	WP2203	Thymic stromal lymphopoietin (TSLP) signaling pathway		-5.5	5	6.3	30211	47	1550	12	0.77	0.22	3569|3575|3576|4067|4790|4791|4792|5971|6772|6775|6776|7292	IL6|IL7R|CXCL8|LYN|NFKB1|NFKB2|NFKBIA|RELB|STAT1|STAT4|STAT5A|TNFSF4	-3.9	MyList
GO Biological Processes	19	GO:0007249	I-kappaB kinase/NF-kappaB signaling	19_GO:0023052 signaling	-5.5	4.6	6.2	30211	55	1550	13	0.84	0.23	329|330|1906|3656|4792|5971|7098|8767|9220|9641|51284|92610|134728	BIRC2|BIRC3|EDN1|IRAK2|NFKBIA|RELB|TLR3|RIPK2|TIAF1|IKBKE|TLR7|TIFA|IRAK1BP1	-3.9	MyList
GO Biological Processes	19	GO:0045620	negative regulation of lymphocyte differentiation	19_GO:0002376 immune system process	-5.5	4.6	6.2	30211	55	1550	13	0.84	0.23	652|861|972|3142|3398|3623|3624|3659|3718|3902|7292|80149|282618	BMP4|RUNX1|CD74|HLX|ID2|INHA|INHBA|IRF1|JAK3|LAG3|TNFSF4|ZC3H12A|IFNL1	-3.9	MyList
GO Biological Processes	19	GO:0036152	phosphatidylethanolamine acyl-chain remodeling	19_GO:0008152 metabolic process	-5.5	12	7.9	30211	10	1550	6	0.39	0.16	5920|8605|54979|63874|154141|254531	PLAAT4|PLA2G4C|PLAAT2|ABHD4|MBOAT1|LPCAT4	-3.9	MyList
GO Biological Processes	19	GO:0060536	cartilage morphogenesis	19_GO:0032502 developmental process	-5.5	12	7.9	30211	10	1550	6	0.39	0.16	3202|6591|6615|6781|7477|9464	HOXA5|SNAI2|SNAI1|STC1|WNT7B|HAND2	-3.9	MyList
GO Biological Processes	19	GO:0032874	positive regulation of stress-activated MAPK cascade	19_GO:0023052 signaling	-5.5	3.1	5.7	30211	131	1550	21	1.4	0.29	652|1647|3552|3553|4217|4615|5610|7098|7124|7185|7422|7474|7477|8767|9464|23236|55504|60401|80149|153769|344558	BMP4|GADD45A|IL1A|IL1B|MAP3K5|MYD88|EIF2AK2|TLR3|TNF|TRAF1|VEGFA|WNT5A|WNT7B|RIPK2|HAND2|PLCB1|TNFRSF19|EDA2R|ZC3H12A|SH3RF2|SH3RF3	-3.9	MyList
Reactome Gene Sets	6	R-HSA-9664424	Cell recruitment (pro-inflammatory response)		-5.5	6.7	6.8	30211	26	1550	9	0.58	0.19	718|719|834|3552|3553|4790|4791|10628|114548	C3|C3AR1|CASP1|IL1A|IL1B|NFKB1|NFKB2|TXNIP|NLRP3	-3.9	MyList
Reactome Gene Sets	6	R-HSA-9660826	Purinergic signaling in leishmaniasis infection		-5.5	6.7	6.8	30211	26	1550	9	0.58	0.19	718|719|834|3552|3553|4790|4791|10628|114548	C3|C3AR1|CASP1|IL1A|IL1B|NFKB1|NFKB2|TXNIP|NLRP3	-3.9	MyList
GO Biological Processes	19	GO:0035455	response to interferon-alpha	19_GO:0050896 response to stimulus	-5.5	7.8	7.1	30211	20	1550	8	0.52	0.18	103|684|3433|3437|3455|4600|5610|27074	ADAR|BST2|IFIT2|IFIT3|IFNAR2|MX2|EIF2AK2|LAMP3	-3.9	MyList
GO Biological Processes	19	GO:0045598	regulation of fat cell differentiation	19_GO:0032502 developmental process	-5.5	3	5.6	30211	142	1550	22	1.4	0.3	1040|1051|2308|2624|2852|3398|3569|4023|4320|5468|5743|6591|6648|7124|7474|7494|9580|28951|65989|80149|84935|374462	CDS1|CEBPB|FOXO1|GATA2|GPER1|ID2|IL6|LPL|MMP11|PPARG|PTGS2|SNAI2|SOD2|TNF|WNT5A|XBP1|SOX13|TRIB2|DLK2|ZC3H12A|MEDAG|PTPRQ	-3.9	MyList
KEGG Pathway	24	hsa04936	Alcoholic liver disease		-5.5	3	5.6	30211	142	1550	22	1.4	0.3	32|717|718|719|2308|2919|2920|2921|3553|3569|3576|3592|4217|4615|4790|4792|5563|5606|7124|9641|50507|257397	ACACB|C2|C3|C3AR1|FOXO1|CXCL1|CXCL2|CXCL3|IL1B|IL6|CXCL8|IL12A|MAP3K5|MYD88|NFKB1|NFKBIA|PRKAA2|MAP2K3|TNF|IKBKE|NOX4|TAB3	-3.9	MyList
GO Biological Processes	19	GO:0080164	regulation of nitric oxide metabolic process	19_GO:0008152 metabolic process	-5.5	4.3	6.1	30211	64	1550	14	0.9	0.24	445|947|961|1906|3553|5743|5806|6648|7124|9314|9722|10333|80149|113277	ASS1|CD34|CD47|EDN1|IL1B|PTGS2|PTX3|SOD2|TNF|KLF4|NOS1AP|TLR6|ZC3H12A|TMEM106A	-3.9	MyList
GO Biological Processes	19	GO:0014066	regulation of phosphatidylinositol 3-kinase signaling	19_GO:0023052 signaling	-5.4	3.3	5.7	30211	111	1550	19	1.2	0.28	634|1440|1634|2065|2149|2247|2321|2852|3815|4824|5156|5270|5364|5783|6352|6662|7124|10385|25827	CEACAM1|CSF3|DCN|ERBB3|F2R|FGF2|FLT1|GPER1|KIT|NKX3-1|PDGFRA|SERPINE2|PLXNB1|PTPN13|CCL5|SOX9|TNF|BTN2A2|FBXL2	-3.9	MyList
WikiPathways	27	WP4172	PI3K-Akt signaling pathway		-5.4	2.2	5.2	30211	345	1550	39	2.5	0.4	627|1129|1435|1440|1942|2149|2247|2252|2321|2323|3371|3455|3481|3569|3574|3575|3655|3672|3674|3679|3695|3696|3718|3815|3909|3911|3914|3918|4790|4803|5156|5293|5563|7422|7424|9180|9586|27006|54541	BDNF|CHRM2|CSF1|CSF3|EFNA1|F2R|FGF2|FGF7|FLT1|FLT3LG|TNC|IFNAR2|IGF2|IL6|IL7|IL7R|ITGA6|ITGA1|ITGA2B|ITGA7|ITGB7|ITGB8|JAK3|KIT|LAMA3|LAMA5|LAMB3|LAMC2|NFKB1|NGF|PDGFRA|PIK3CD|PRKAA2|VEGFA|VEGFC|OSMR|CREB5|FGF22|DDIT4	-3.9	MyList
GO Biological Processes	19	GO:0070229	negative regulation of lymphocyte apoptotic process	19_GO:0048519 negative regulation of biological process	-5.4	5.9	6.6	30211	33	1550	10	0.65	0.2	652|972|1942|3091|3575|3620|3718|6352|27086|84941	BMP4|CD74|EFNA1|HIF1A|IL7R|IDO1|JAK3|CCL5|FOXP1|HSH2D	-3.9	MyList
GO Biological Processes	19	GO:0048871	multicellular organismal homeostasis	19_GO:0032501 multicellular organismal process	-5.4	2.2	5.2	30211	359	1550	40	2.6	0.4	21|32|134|216|231|360|947|1080|1435|2149|2308|2624|2697|3037|3552|3553|3569|3574|4155|4891|4938|5563|5743|5745|6513|6608|6662|7357|7422|8013|9079|11151|23371|28514|50507|57561|64116|84879|158046|100506658	ABCA3|ACACB|ADORA1|ALDH1A1|AKR1B1|AQP3|CD34|CFTR|CSF1|F2R|FOXO1|GATA2|GJA1|HAS2|IL1A|IL1B|IL6|IL7|MBP|SLC11A2|OAS1|PRKAA2|PTGS2|PTH1R|SLC2A1|SMO|SOX9|UGCG|VEGFA|NR4A3|LDB2|CORO1A|TNS2|DLL1|NOX4|ARRDC3|SLC39A8|MFSD2A|NXNL2|OCLN	-3.9	MyList
GO Biological Processes	19	GO:0043903	regulation of biological process involved in symbiotic interaction	19_GO:0044419 biological process involved in interspecies interaction between organisms	-5.4	4.5	6.1	30211	56	1550	13	0.84	0.23	972|3576|3965|5806|6372|6737|7706|9830|10346|10475|85363|117854|222537	CD74|CXCL8|LGALS9|PTX3|CXCL6|TRIM21|TRIM25|TRIM14|TRIM22|TRIM38|TRIM5|TRIM6|HS3ST5	-3.9	MyList
KEGG Pathway	24	hsa04658	Th1 and Th2 cell differentiation		-5.4	3.6	5.8	30211	92	1550	17	1.1	0.26	3112|3460|3592|3594|3714|3718|4790|4792|4793|4794|5533|6772|6775|6776|28514|54567|55534	HLA-DOB|IFNGR2|IL12A|IL12RB1|JAG2|JAK3|NFKB1|NFKBIA|NFKBIB|NFKBIE|PPP3CC|STAT1|STAT4|STAT5A|DLL1|DLL4|MAML3	-3.9	MyList
GO Biological Processes	19	GO:0044089	positive regulation of cellular component biogenesis	19_GO:0048518 positive regulation of biological process	-5.4	2	5.1	30211	493	1550	50	3.2	0.45	19|21|25|627|637|859|961|1437|1440|2049|2823|3038|3084|3397|3815|3936|4312|4314|4615|5021|6662|7043|7124|7422|7453|8739|9079|9636|10333|10458|10602|22865|25802|28984|29109|51738|54874|55604|55971|57463|64218|84630|114798|115362|139065|146206|171024|347731|347902|100506658	ABCA1|ABCA3|ABL1|BDNF|BID|CAV3|CD47|CSF2|CSF3|EPHB3|GPM6A|HAS3|NRG1|ID1|KIT|LCP1|MMP1|MMP3|MYD88|OXTR|SOX9|TGFB3|TNF|VEGFA|WARS1|HRK|LDB2|ISG15|TLR6|BAIAP2|CDC42EP3|SLITRK3|LMOD1|RGCC|FHOD1|GHRL|FNBP1L|CARMIL1|BAIAP2L1|AMIGO1|SEMA4A|TTBK1|SLITRK1|GBP5|SLITRK4|CARMIL2|SYNPO2|LRRTM3|AMIGO2|OCLN	-3.9	MyList
GO Biological Processes	19	GO:0032677	regulation of interleukin-8 production	19_GO:0032501 multicellular organismal process	-5.4	3.4	5.7	30211	102	1550	18	1.2	0.27	972|1116|2149|3553|3569|3965|4615|5054|5788|7098|7124|7474|9314|10333|23586|26191|51284|338322	CD74|CHI3L1|F2R|IL1B|IL6|LGALS9|MYD88|SERPINE1|PTPRC|TLR3|TNF|WNT5A|KLF4|TLR6|DDX58|PTPN22|TLR7|NLRP10	-3.8	MyList
WikiPathways	27	WP474	Endochondral ossification		-5.4	4.2	6	30211	65	1550	14	0.9	0.24	579|1028|1300|2247|3481|4318|5328|5744|5745|6662|6772|7422|54407|55553	NKX3-2|CDKN1C|COL10A1|FGF2|IGF2|MMP9|PLAU|PTHLH|PTH1R|SOX9|STAT1|VEGFA|SLC38A2|SOX6	-3.8	MyList
WikiPathways	27	WP4808	Endochondral ossification with skeletal dysplasias		-5.4	4.2	6	30211	65	1550	14	0.9	0.24	579|1028|1300|2247|3481|4318|5328|5744|5745|6662|6772|7422|54407|55553	NKX3-2|CDKN1C|COL10A1|FGF2|IGF2|MMP9|PLAU|PTHLH|PTH1R|SOX9|STAT1|VEGFA|SLC38A2|SOX6	-3.8	MyList
WikiPathways	27	WP2882	Nuclear receptors meta-pathway		-5.4	2.2	5.2	30211	322	1550	37	2.4	0.39	196|329|330|1028|1839|2308|2495|2941|3084|3553|3589|3592|3726|4791|5055|5142|5552|5743|5997|6347|6364|6513|6591|6817|7124|7128|7421|8436|8507|10602|10769|11182|23516|23764|27063|64116|347902	AHR|BIRC2|BIRC3|CDKN1C|HBEGF|FOXO1|FTH1|GSTA4|NRG1|IL1B|IL11|IL12A|JUNB|NFKB2|SERPINB2|PDE4B|SRGN|PTGS2|RGS2|CCL2|CCL20|SLC2A1|SNAI2|SULT1A1|TNF|TNFAIP3|VDR|CAVIN2|ENC1|CDC42EP3|PLK2|SLC2A6|SLC39A14|MAFF|ANKRD1|SLC39A8|AMIGO2	-3.8	MyList
GO Biological Processes	19	GO:0043254	regulation of protein-containing complex assembly	19_GO:0050789 regulation of biological process	-5.3	2.1	5.1	30211	401	1550	43	2.8	0.42	19|21|25|329|637|859|1410|1437|1440|2006|2670|3084|3309|3936|4312|4314|4615|5610|5734|6662|7124|7422|7453|8739|9636|9641|10333|10458|10602|11151|22943|25802|27124|55604|55971|57731|80206|84630|112476|112755|115362|146206|100506658	ABCA1|ABCA3|ABL1|BIRC2|BID|CAV3|CRYAB|CSF2|CSF3|ELN|GFAP|NRG1|HSPA5|LCP1|MMP1|MMP3|MYD88|EIF2AK2|PTGER4|SOX9|TNF|VEGFA|WARS1|HRK|ISG15|IKBKE|TLR6|BAIAP2|CDC42EP3|CORO1A|DKK1|LMOD1|INPP5J|CARMIL1|BAIAP2L1|SPTBN4|FHOD3|TTBK1|PRRT2|STX1B|GBP5|CARMIL2|OCLN	-3.8	MyList
GO Biological Processes	19	GO:0009410	response to xenobiotic stimulus	19_GO:0050896 response to stimulus	-5.3	2.1	5.1	30211	401	1550	43	2.8	0.42	18|21|25|32|135|196|445|999|1906|2330|2941|3309|3351|3357|3553|3624|4015|4023|4067|4824|4862|4982|5021|5142|5446|5563|5743|6506|6648|6772|6817|7098|7124|7424|8989|9447|10512|10628|23492|27063|29785|54498|134147	ABAT|ABCA3|ABL1|ACACB|ADORA2A|AHR|ASS1|CDH1|EDN1|FMO5|GSTA4|HSPA5|HTR1B|HTR2B|IL1B|INHBA|LOX|LPL|LYN|NKX3-1|NPAS2|TNFRSF11B|OXTR|PDE4B|PON3|PRKAA2|PTGS2|SLC1A2|SOD2|STAT1|SULT1A1|TLR3|TNF|VEGFC|TRPA1|AIM2|SEMA3C|TXNIP|CBX7|ANKRD1|CYP2S1|SMOX|CMBL	-3.8	MyList
GO Biological Processes	19	GO:0033673	negative regulation of kinase activity	19_GO:0048519 negative regulation of biological process	-5.3	2.5	5.3	30211	236	1550	30	1.9	0.35	25|103|135|634|652|859|868|1028|1647|3553|4067|5468|5788|5794|5800|5997|7023|7026|7128|7453|9052|10019|10636|26191|28951|79007|90007|93649|124790|374462	ABL1|ADAR|ADORA2A|CEACAM1|BMP4|CAV3|CBLB|CDKN1C|GADD45A|IL1B|LYN|PPARG|PTPRC|PTPRH|PTPRO|RGS2|TFAP4|NR2F2|TNFAIP3|WARS1|GPRC5A|SH2B3|RGS14|PTPN22|TRIB2|DBNDD1|MIDN|MYOCD|HEXIM2|PTPRQ	-3.8	MyList
WikiPathways	27	WP1433	Nucleotide-binding oligomerization domain (NOD) pathway		-5.3	5.2	6.3	30211	41	1550	11	0.71	0.21	639|834|840|3553|4792|8767|9447|84674|114548|147945|338322	PRDM1|CASP1|CASP7|IL1B|NFKBIA|RIPK2|AIM2|CARD6|NLRP3|NLRP4|NLRP10	-3.8	MyList
GO Biological Processes	19	GO:0061180	mammary gland epithelium development	19_GO:0032502 developmental process	-5.3	4.4	6.1	30211	57	1550	13	0.84	0.23	367|374|1051|1435|2247|3091|3202|3398|5371|6608|7421|7474|7477	AR|AREG|CEBPB|CSF1|FGF2|HIF1A|HOXA5|ID2|PML|SMO|VDR|WNT5A|WNT7B	-3.8	MyList
GO Biological Processes	19	GO:0090596	sensory organ morphogenesis	19_GO:0032502 developmental process	-5.3	2.4	5.2	30211	261	1550	32	2.1	0.36	220|357|579|639|652|668|1906|2295|2301|2535|2624|2637|3091|3198|4211|4237|5013|5357|5916|6662|6935|7422|7474|7855|10194|22882|23424|26018|28514|84879|116039|130497	ALDH1A3|SHROOM2|NKX3-2|PRDM1|BMP4|FOXL2|EDN1|FOXF2|FOXE3|FZD2|GATA2|GBX2|HIF1A|HOXA1|MEIS1|MFAP2|OTX1|PLS1|RARG|SOX9|ZEB1|VEGFA|WNT5A|FZD5|TSHZ1|ZHX2|TDRD7|LRIG1|DLL1|MFSD2A|OSR2|OSR1	-3.8	MyList
KEGG Pathway	24	hsa05132	Salmonella infection		-5.3	2.4	5.3	30211	249	1550	31	2	0.36	329|330|834|837|840|3553|3569|3576|3798|4615|4790|4792|5287|5293|5606|5788|7124|7277|8743|8767|8795|10333|26084|29109|57180|57381|113146|114548|197259|257397|338382	BIRC2|BIRC3|CASP1|CASP4|CASP7|IL1B|IL6|CXCL8|KIF5A|MYD88|NFKB1|NFKBIA|PIK3C2B|PIK3CD|MAP2K3|PTPRC|TNF|TUBA4A|TNFSF10|RIPK2|TNFRSF10B|TLR6|ARHGEF26|FHOD1|ACTR3B|RHOJ|AHNAK2|NLRP3|MLKL|TAB3|RAB7B	-3.8	MyList
GO Biological Processes	19	GO:0048247	lymphocyte chemotaxis	19_GO:0040011 locomotion	-5.3	4.8	6.1	30211	49	1550	12	0.77	0.22	3627|5293|6288|6347|6348|6351|6352|6354|6355|6364|6373|58191	CXCL10|PIK3CD|SAA1|CCL2|CCL3|CCL4|CCL5|CCL7|CCL8|CCL20|CXCL11|CXCL16	-3.8	MyList
KEGG Pathway	24	hsa05163	Human cytomegalovirus infection		-5.3	2.5	5.3	30211	225	1550	29	1.9	0.34	637|3106|3133|3134|3553|3569|3576|3709|4790|4792|5156|5293|5330|5533|5732|5734|5743|6347|6348|6351|6352|6890|6891|6892|7124|7422|9586|23236|196883	BID|HLA-B|HLA-E|HLA-F|IL1B|IL6|CXCL8|ITPR2|NFKB1|NFKBIA|PDGFRA|PIK3CD|PLCB2|PPP3CC|PTGER2|PTGER4|PTGS2|CCL2|CCL3|CCL4|CCL5|TAP1|TAP2|TAPBP|TNF|VEGFA|CREB5|PLCB1|ADCY4	-3.8	MyList
Canonical Pathways	11	M255	PID HIF1 TFPATHWAY		-5.3	4.1	5.9	30211	66	1550	14	0.9	0.24	133|1906|2113|2624|3091|3099|3398|5054|5209|6513|7422|10397|54583|79365	ADM|EDN1|ETS1|GATA2|HIF1A|HK2|ID2|SERPINE1|PFKFB3|SLC2A1|VEGFA|NDRG1|EGLN1|BHLHE41	-3.8	MyList
GO Biological Processes	19	GO:0048008	platelet-derived growth factor receptor signaling pathway	19_GO:0023052 signaling	-5.3	5.7	6.4	30211	34	1550	10	0.65	0.2	25|4015|5156|5157|7422|8013|10628|10636|64651|407006	ABL1|LOX|PDGFRA|PDGFRL|VEGFA|NR4A3|TXNIP|RGS14|CSRNP1|MIR221	-3.8	MyList
Canonical Pathways	11	M44	PID HIF2PATHWAY		-5.3	5.7	6.4	30211	34	1550	10	0.65	0.2	135|1942|2113|2321|4323|4891|5054|6513|7422|54583	ADORA2A|EFNA1|ETS1|FLT1|MMP14|SLC11A2|SERPINE1|SLC2A1|VEGFA|EGLN1	-3.8	MyList
GO Biological Processes	19	GO:0070232	regulation of T cell apoptotic process	19_GO:0050789 regulation of biological process	-5.3	5.7	6.4	30211	34	1550	10	0.65	0.2	652|1942|3091|3575|3620|3718|3965|6352|7474|29126	BMP4|EFNA1|HIF1A|IL7R|IDO1|JAK3|LGALS9|CCL5|WNT5A|CD274	-3.8	MyList
GO Biological Processes	19	GO:0072676	lymphocyte migration	19_GO:0040011 locomotion	-5.3	3.9	5.8	30211	75	1550	15	0.97	0.25	1901|3383|3627|3695|5293|6288|6347|6348|6351|6352|6354|6355|6364|6373|58191	S1PR1|ICAM1|CXCL10|ITGB7|PIK3CD|SAA1|CCL2|CCL3|CCL4|CCL5|CCL7|CCL8|CCL20|CXCL11|CXCL16	-3.8	MyList
Reactome Gene Sets	6	R-HSA-168164	Toll Like Receptor 3 (TLR3) Cascade		-5.3	3.5	5.7	30211	94	1550	17	1.1	0.26	329|330|1326|1846|3656|3665|4790|4791|4792|4793|5606|6195|6288|7098|8767|9641|257397	BIRC2|BIRC3|MAP3K8|DUSP4|IRAK2|IRF7|NFKB1|NFKB2|NFKBIA|NFKBIB|MAP2K3|RPS6KA1|SAA1|TLR3|RIPK2|IKBKE|TAB3	-3.7	MyList
GO Biological Processes	19	GO:0001704	formation of primary germ layer	19_GO:0032502 developmental process	-5.3	3.2	5.6	30211	114	1550	19	1.2	0.28	652|1294|1846|2114|3624|3679|3909|3914|4318|4323|6615|6911|7474|8091|9314|22943|23135|55897|83595	BMP4|COL7A1|DUSP4|ETS2|INHBA|ITGA7|LAMA3|LAMB3|MMP9|MMP14|SNAI1|TBX6|WNT5A|HMGA2|KLF4|DKK1|KDM6B|MESP1|SOX7	-3.7	MyList
GO Biological Processes	19	GO:0019216	regulation of lipid metabolic process	19_GO:0008152 metabolic process	-5.2	2.2	5.1	30211	339	1550	38	2.5	0.39	21|32|133|134|341|634|718|972|1594|2053|2247|2321|2330|2852|3357|3398|3552|3553|3815|4067|4790|5156|5163|5468|5743|6591|6615|6662|7124|8013|10347|11277|23541|55908|84879|134429|157506|158219	ABCA3|ACACB|ADM|ADORA1|APOC1|CEACAM1|C3|CD74|CYP27B1|EPHX2|FGF2|FLT1|FMO5|GPER1|HTR2B|ID2|IL1A|IL1B|KIT|LYN|NFKB1|PDGFRA|PDK1|PPARG|PTGS2|SNAI2|SNAI1|SOX9|TNF|NR4A3|ABCA7|TREX1|SEC14L2|ANGPTL8|MFSD2A|STARD4|RDH10|TTC39B	-3.7	MyList
GO Biological Processes	19	GO:0051129	negative regulation of cellular component organization	19_GO:0048519 negative regulation of biological process	-5.2	1.8	4.9	30211	684	1550	63	4.1	0.5	329|341|367|652|859|1410|1803|1901|1942|1948|2670|3306|3309|3397|3553|3627|3976|4155|4323|4683|5468|5734|5800|6662|6911|7025|7124|7133|7422|7474|7869|8837|9554|9882|10105|10347|10512|11151|22891|22943|23251|23258|23671|25802|27124|54464|55604|57715|57731|64218|65078|80128|80206|80312|83478|84830|112476|112755|124930|146206|157285|223117|349667	BIRC2|APOC1|AR|BMP4|CAV3|CRYAB|DPP4|S1PR1|EFNA1|EFNB2|GFAP|HSPA2|HSPA5|ID1|IL1B|CXCL10|LIF|MBP|MMP14|NBN|PPARG|PTGER4|PTPRO|SOX9|TBX6|NR2F1|TNF|TNFRSF1B|VEGFA|WNT5A|SEMA3B|CFLAR|SEC22B|TBC1D4|PPIF|ABCA7|SEMA3C|CORO1A|ZNF365|DKK1|MINAR1|DENND5A|TMEFF2|LMOD1|INPP5J|XRN1|CARMIL1|SEMA4G|SPTBN4|SEMA4A|RTN4R|TRIM46|FHOD3|TET1|ARHGAP24|ADTRP|PRRT2|STX1B|ANKRD13B|CARMIL2|PRAG1|SEMA3D|RTN4RL2	-3.7	MyList
Reactome Gene Sets	6	R-HSA-216083	Integrin cell surface interactions		-5.2	3.7	5.7	30211	85	1550	16	1	0.26	960|961|999|1294|1300|3371|3383|3386|3655|3672|3674|3679|3695|3696|4060|7412	CD44|CD47|CDH1|COL7A1|COL10A1|TNC|ICAM1|ICAM4|ITGA6|ITGA1|ITGA2B|ITGA7|ITGB7|ITGB8|LUM|VCAM1	-3.7	MyList
GO Biological Processes	19	GO:2000106	regulation of leukocyte apoptotic process	19_GO:0050789 regulation of biological process	-5.2	3.7	5.7	30211	85	1550	16	1	0.26	652|972|1942|3091|3575|3620|3665|3718|3965|4067|5293|6352|7474|27086|29126|84941	BMP4|CD74|EFNA1|HIF1A|IL7R|IDO1|IRF7|JAK3|LGALS9|LYN|PIK3CD|CCL5|WNT5A|FOXP1|CD274|HSH2D	-3.7	MyList
GO Biological Processes	19	GO:0060135	maternal process involved in female pregnancy	19_GO:0022414 reproductive process	-5.2	4.4	6	30211	58	1550	13	0.84	0.23	367|639|1594|3726|3965|3976|5743|5997|6781|7026|7421|23780|51738	AR|PRDM1|CYP27B1|JUNB|LGALS9|LIF|PTGS2|RGS2|STC1|NR2F2|VDR|APOL2|GHRL	-3.7	MyList
GO Biological Processes	19	GO:0002821	positive regulation of adaptive immune response	19_GO:0002376 immune system process	-5.2	3.2	5.5	30211	115	1550	19	1.2	0.28	718|3106|3133|3134|3553|3569|3592|3594|5788|7124|7292|7855|8767|10673|29126|64332|91543|114548|338322	C3|HLA-B|HLA-E|HLA-F|IL1B|IL6|IL12A|IL12RB1|PTPRC|TNF|TNFSF4|FZD5|RIPK2|TNFSF13B|CD274|NFKBIZ|RSAD2|NLRP3|NLRP10	-3.7	MyList
GO Biological Processes	19	GO:0034121	regulation of toll-like receptor signaling pathway	19_GO:0002376 immune system process	-5.2	3.8	5.8	30211	76	1550	15	0.97	0.25	329|330|3430|3659|3665|4067|4814|7098|7128|10333|26191|54726|91543|338382|730249	BIRC2|BIRC3|IFI35|IRF1|IRF7|LYN|NINJ1|TLR3|TNFAIP3|TLR6|PTPN22|OTUD4|RSAD2|RAB7B|ACOD1	-3.7	MyList
GO Biological Processes	19	GO:0043542	endothelial cell migration	19_GO:0040011 locomotion	-5.2	4.1	5.9	30211	67	1550	14	0.9	0.24	25|1803|1948|2050|2247|3397|3964|6091|7422|9404|23129|57449|84830|154796	ABL1|DPP4|EFNB2|EPHB4|FGF2|ID1|LGALS8|ROBO1|VEGFA|LPXN|PLXND1|PLEKHG5|ADTRP|AMOT	-3.7	MyList
GO Biological Processes	19	GO:0002704	negative regulation of leukocyte mediated immunity	19_GO:0002376 immune system process	-5.2	4.1	5.9	30211	67	1550	14	0.9	0.24	196|634|684|1379|3106|3133|3134|3575|3598|3718|3965|5788|6318|259307	AHR|CEACAM1|BST2|CR1L|HLA-B|HLA-E|HLA-F|IL7R|IL13RA2|JAK3|LGALS9|PTPRC|SERPINB4|IL4I1	-3.7	MyList
GO Biological Processes	19	GO:0052372	modulation by symbiont of entry into host	19_GO:0044419 biological process involved in interspecies interaction between organisms	-5.2	4.7	6.1	30211	50	1550	12	0.77	0.22	972|3576|3965|5806|6737|7706|9830|10346|10475|85363|117854|222537	CD74|CXCL8|LGALS9|PTX3|TRIM21|TRIM25|TRIM14|TRIM22|TRIM38|TRIM5|TRIM6|HS3ST5	-3.7	MyList
GO Biological Processes	19	GO:1903053	regulation of extracellular matrix organization	19_GO:0050789 regulation of biological process	-5.2	4.7	6.1	30211	50	1550	12	0.77	0.22	25|861|1803|3037|3569|6662|7133|8837|28984|84627|84830|146206	ABL1|RUNX1|DPP4|HAS2|IL6|SOX9|TNFRSF1B|CFLAR|RGCC|ZNF469|ADTRP|CARMIL2	-3.7	MyList
KEGG Pathway	24	hsa05144	Malaria		-5.2	4.7	6.1	30211	50	1550	12	0.77	0.22	1379|1440|3383|3553|3569|3576|3592|4615|6347|7043|7124|7412	CR1L|CSF3|ICAM1|IL1B|IL6|CXCL8|IL12A|MYD88|CCL2|TGFB3|TNF|VCAM1	-3.7	MyList
CORUM	33	CORUM:5193	TNF-alpha/NF-kappa B signaling complex (CHUK, KPNA3, NFKB2, NFKBIB, REL, IKBKG, NFKB1, NFKBIE, RELB, NFKBIA, RELA, TNIP2)		-5.2	11	7.4	30211	11	1550	6	0.39	0.16	4790|4791|4792|4793|4794|5971	NFKB1|NFKB2|NFKBIA|NFKBIB|NFKBIE|RELB	-3.7	MyList
GO Biological Processes	19	GO:0060556	regulation of vitamin D biosynthetic process	19_GO:0008152 metabolic process	-5.2	14	8	30211	7	1550	5	0.32	0.14	1594|4790|6591|6615|7124	CYP27B1|NFKB1|SNAI2|SNAI1|TNF	-3.6	MyList
GO Biological Processes	19	GO:0070106	interleukin-27-mediated signaling pathway	19_GO:0023052 signaling	-5.2	14	8	30211	7	1550	5	0.32	0.14	4599|4938|4939|6772|8638	MX1|OAS1|OAS2|STAT1|OASL	-3.6	MyList
GO Biological Processes	19	GO:0032364	oxygen homeostasis	19_GO:0065007 biological regulation	-5.2	14	8	30211	7	1550	5	0.32	0.14	3091|6648|7477|54583|282679	HIF1A|SOD2|WNT7B|EGLN1|AQP11	-3.6	MyList
GO Biological Processes	19	GO:0060558	regulation of calcidiol 1-monooxygenase activity	19_GO:0065007 biological regulation	-5.2	14	8	30211	7	1550	5	0.32	0.14	1594|3553|4790|7124|7421	CYP27B1|IL1B|NFKB1|TNF|VDR	-3.6	MyList
WikiPathways	27	WP4496	Signal transduction through IL1R		-5.2	5.6	6.3	30211	35	1550	10	0.65	0.2	3552|3553|3569|3656|4615|4790|4792|5606|7043|7124	IL1A|IL1B|IL6|IRAK2|MYD88|NFKB1|NFKBIA|MAP2K3|TGFB3|TNF	-3.6	MyList
Reactome Gene Sets	6	R-HSA-936440	Negative regulators of DDX58/IFIH1 signaling		-5.2	5.6	6.3	30211	35	1550	10	0.65	0.2	1540|7128|7318|7706|9246|9636|9641|23586|51191|64135	CYLD|TNFAIP3|UBA7|TRIM25|UBE2L6|ISG15|IKBKE|DDX58|HERC5|IFIH1	-3.6	MyList
GO Biological Processes	19	GO:0002263	cell activation involved in immune response	19_GO:0002376 immune system process	-5.1	2.7	5.3	30211	182	1550	25	1.6	0.32	25|972|2207|3383|3430|3569|3815|3936|4067|4615|4683|5293|5734|5971|6348|7462|8013|8995|9111|11151|11277|27086|28514|56892|64218	ABL1|CD74|FCER1G|ICAM1|IFI35|IL6|KIT|LCP1|LYN|MYD88|NBN|PIK3CD|PTGER4|RELB|CCL3|LAT2|NR4A3|TNFSF18|NMI|CORO1A|TREX1|FOXP1|DLL1|TCIM|SEMA4A	-3.6	MyList
GO Biological Processes	19	GO:0046425	regulation of receptor signaling pathway via JAK-STAT	19_GO:0023052 signaling	-5.1	3.8	5.7	30211	77	1550	15	0.97	0.25	2149|3569|3575|3718|3815|5788|6352|7124|8835|9021|10019|11009|54625|282618|407006	F2R|IL6|IL7R|JAK3|KIT|PTPRC|CCL5|TNF|SOCS2|SOCS3|SH2B3|IL24|PARP14|IFNL1|MIR221	-3.6	MyList
KEGG Pathway	24	hsa05140	Leishmaniasis		-5.1	3.8	5.7	30211	77	1550	15	0.97	0.25	718|1379|3112|3460|3552|3553|3592|4615|4790|4792|4793|5743|6772|7043|7124	C3|CR1L|HLA-DOB|IFNGR2|IL1A|IL1B|IL12A|MYD88|NFKB1|NFKBIA|NFKBIB|PTGS2|STAT1|TGFB3|TNF	-3.6	MyList
Reactome Gene Sets	6	R-HSA-9658195	Leishmania infection		-5.1	2.4	5.1	30211	254	1550	31	2	0.36	25|133|135|718|719|834|2863|3552|3553|3569|3709|4067|4160|4651|4790|4791|5732|5734|5739|5744|5745|6019|7474|10458|10628|10769|10811|53831|79651|114548|196883	ABL1|ADM|ADORA2A|C3|C3AR1|CASP1|GPR39|IL1A|IL1B|IL6|ITPR2|LYN|MC4R|MYO10|NFKB1|NFKB2|PTGER2|PTGER4|PTGIR|PTHLH|PTH1R|RLN2|WNT5A|BAIAP2|TXNIP|PLK2|NOXA1|GPR84|RHBDF2|NLRP3|ADCY4	-3.6	MyList
GO Biological Processes	19	GO:0031334	positive regulation of protein-containing complex assembly	19_GO:0048518 positive regulation of biological process	-5.1	2.6	5.2	30211	194	1550	26	1.7	0.33	19|21|637|859|1437|1440|3084|3936|4312|4314|4615|7124|7422|7453|8739|9636|10333|10458|10602|25802|55604|55971|84630|115362|146206|100506658	ABCA1|ABCA3|BID|CAV3|CSF2|CSF3|NRG1|LCP1|MMP1|MMP3|MYD88|TNF|VEGFA|WARS1|HRK|ISG15|TLR6|BAIAP2|CDC42EP3|LMOD1|CARMIL1|BAIAP2L1|TTBK1|GBP5|CARMIL2|OCLN	-3.6	MyList
GO Biological Processes	19	GO:2001242	regulation of intrinsic apoptotic signaling pathway	19_GO:0023052 signaling	-5.1	2.7	5.3	30211	171	1550	24	1.5	0.31	624|637|960|972|1540|3091|4318|4582|4824|5329|5743|6591|6615|6648|7494|8382|8531|8876|9709|10017|10105|23604|80237|219790	BDKRB2|BID|CD44|CD74|CYLD|HIF1A|MMP9|MUC1|NKX3-1|PLAUR|PTGS2|SNAI2|SNAI1|SOD2|XBP1|NME5|YBX3|VNN1|HERPUD1|BCL2L10|PPIF|DAPK2|ELL3|RTKN2	-3.6	MyList
GO Biological Processes	19	GO:0046635	positive regulation of alpha-beta T cell activation	19_GO:0022610 biological adhesion	-5.1	4	5.8	30211	68	1550	14	0.9	0.24	861|3133|3142|3592|3594|3965|5788|7292|8767|9308|10148|26191|64332|114548	RUNX1|HLA-E|HLX|IL12A|IL12RB1|LGALS9|PTPRC|TNFSF4|RIPK2|CD83|EBI3|PTPN22|NFKBIZ|NLRP3	-3.6	MyList
GO Biological Processes	19	GO:2000179	positive regulation of neural precursor cell proliferation	19_GO:0048518 positive regulation of biological process	-5.1	4.6	6	30211	51	1550	12	0.77	0.22	2247|2735|3091|4067|6604|6608|7422|7424|9283|9760|54567|80237	FGF2|GLI1|HIF1A|LYN|SMARCD3|SMO|VEGFA|VEGFC|GPR37L1|TOX|DLL4|ELL3	-3.6	MyList
GO Biological Processes	19	GO:0032330	regulation of chondrocyte differentiation	19_GO:0032502 developmental process	-5.1	4.6	6	30211	51	1550	12	0.77	0.22	579|652|5744|5916|6474|6591|6662|8200|55553|81792|91461|144347	NKX3-2|BMP4|PTHLH|RARG|SHOX2|SNAI2|SOX9|GDF5|SOX6|ADAMTS12|PKDCC|RFLNA	-3.6	MyList
GO Biological Processes	19	GO:1904407	positive regulation of nitric oxide metabolic process	19_GO:0048518 positive regulation of biological process	-5.1	5	6.1	30211	43	1550	11	0.71	0.21	445|1906|3553|5743|5806|6648|7124|9314|9722|10333|113277	ASS1|EDN1|IL1B|PTGS2|PTX3|SOD2|TNF|KLF4|NOS1AP|TLR6|TMEM106A	-3.6	MyList
GO Biological Processes	19	GO:0046596	regulation of viral entry into host cell	19_GO:0016032 viral process	-5.1	5	6.1	30211	43	1550	11	0.71	0.21	972|3965|5806|6737|7706|9830|10346|10475|85363|117854|222537	CD74|LGALS9|PTX3|TRIM21|TRIM25|TRIM14|TRIM22|TRIM38|TRIM5|TRIM6|HS3ST5	-3.6	MyList
GO Biological Processes	19	GO:0031667	response to nutrient levels	19_GO:0050896 response to stimulus	-5.1	2	4.9	30211	437	1550	45	2.9	0.43	32|133|360|445|467|490|1594|2308|3309|3428|3552|3627|4023|4160|4217|4654|4982|5468|5563|5610|5743|6513|6648|6751|6772|6781|6935|7124|7352|7378|7412|7421|7494|7706|7942|8942|27141|51738|54407|80149|81788|84879|90226|154743|168620	ACACB|ADM|AQP3|ASS1|ATF3|ATP2B1|CYP27B1|FOXO1|HSPA5|IFI16|IL1A|CXCL10|LPL|MC4R|MAP3K5|MYOD1|TNFRSF11B|PPARG|PRKAA2|EIF2AK2|PTGS2|SLC2A1|SOD2|SSTR1|STAT1|STC1|ZEB1|TNF|UCP3|UPP1|VCAM1|VDR|XBP1|TRIM25|TFEB|KYNU|CIDEB|GHRL|SLC38A2|ZC3H12A|NUAK2|MFSD2A|UCN2|BMT2|BHLHA15	-3.6	MyList
GO Biological Processes	19	GO:2001237	negative regulation of extrinsic apoptotic signaling pathway	19_GO:0023052 signaling	-5.1	3.4	5.5	30211	97	1550	17	1.1	0.26	367|652|1437|2537|2668|3383|3552|3553|3574|3655|5054|6591|7124|7128|8837|85450|407006	AR|BMP4|CSF2|IFI6|GDNF|ICAM1|IL1A|IL1B|IL7|ITGA6|SERPINE1|SNAI2|TNF|TNFAIP3|CFLAR|ITPRIP|MIR221	-3.6	MyList
KEGG Pathway	24	hsa04380	Osteoclast differentiation		-5.1	3	5.4	30211	128	1550	20	1.3	0.29	1435|1540|3455|3460|3552|3553|3726|4286|4790|4791|4792|4982|5293|5468|5533|5971|6772|6773|7124|9021	CSF1|CYLD|IFNAR2|IFNGR2|IL1A|IL1B|JUNB|MITF|NFKB1|NFKB2|NFKBIA|TNFRSF11B|PIK3CD|PPARG|PPP3CC|RELB|STAT1|STAT2|TNF|SOCS3	-3.6	MyList
GO Biological Processes	19	GO:0072073	kidney epithelium development	19_GO:0032502 developmental process	-5.1	3	5.4	30211	128	1550	20	1.3	0.29	652|947|1948|2247|2668|3911|5087|5800|6608|6662|7477|9244|9863|10409|26249|28514|28999|130497|168667|282679	BMP4|CD34|EFNB2|FGF2|GDNF|LAMA5|PBX1|PTPRO|SMO|SOX9|WNT7B|CRLF1|MAGI2|BASP1|KLHL3|DLL1|KLF15|OSR1|BMPER|AQP11	-3.6	MyList
GO Biological Processes	19	GO:1905114	cell surface receptor signaling pathway involved in cell-cell signaling	19_GO:0023052 signaling	-5.1	2.2	5	30211	319	1550	36	2.3	0.38	134|135|607|652|718|1540|1906|1952|2535|2735|2869|4163|4286|5026|5563|5916|6608|7474|7477|7855|8613|9127|9314|9863|22943|27123|51738|64750|79412|84327|84870|92162|144165|147495|388135|100113407	ADORA1|ADORA2A|BCL9|BMP4|C3|CYLD|EDN1|CELSR2|FZD2|GLI1|GRK5|MCC|MITF|P2RX5|PRKAA2|RARG|SMO|WNT5A|WNT7B|FZD5|PLPP3|P2RX6|KLF4|MAGI2|DKK1|DKK2|GHRL|SMURF2|KREMEN2|ZBED3|RSPO3|TMEM88|PRICKLE1|APCDD1|INSYN1|TMEM170B	-3.6	MyList
KEGG Pathway	24	hsa04612	Antigen processing and presentation		-5.1	3.7	5.7	30211	78	1550	15	0.97	0.25	972|1520|3106|3112|3133|3134|3306|3309|5641|5721|6890|6891|6892|7124|10437	CD74|CTSS|HLA-B|HLA-DOB|HLA-E|HLA-F|HSPA2|HSPA5|LGMN|PSME2|TAP1|TAP2|TAPBP|TNF|IFI30	-3.6	MyList
GO Biological Processes	19	GO:0030217	T cell differentiation	19_GO:0002376 immune system process	-5.1	2.9	5.3	30211	150	1550	22	1.4	0.3	25|972|2207|3569|3574|3575|3659|3714|3815|5293|5734|5788|5971|7855|9580|9760|26191|27086|54567|64218|80758|91543	ABL1|CD74|FCER1G|IL6|IL7|IL7R|IRF1|JAG2|KIT|PIK3CD|PTGER4|PTPRC|RELB|FZD5|SOX13|TOX|PTPN22|FOXP1|DLL4|SEMA4A|PRR7|RSAD2	-3.6	MyList
GO Biological Processes	19	GO:0060249	anatomical structure homeostasis	19_GO:0065007 biological regulation	-5.1	2.3	5	30211	281	1550	33	2.1	0.37	21|134|216|490|783|825|859|947|1435|2149|2624|2697|3091|3351|3569|3574|4015|4130|4155|4938|5743|5745|6513|6608|6662|7422|9079|11151|50507|64116|84879|158046|100506658	ABCA3|ADORA1|ALDH1A1|ATP2B1|CACNB2|CAPN3|CAV3|CD34|CSF1|F2R|GATA2|GJA1|HIF1A|HTR1B|IL6|IL7|LOX|MAP1A|MBP|OAS1|PTGS2|PTH1R|SLC2A1|SMO|SOX9|VEGFA|LDB2|CORO1A|NOX4|SLC39A8|MFSD2A|NXNL2|OCLN	-3.5	MyList
GO Biological Processes	19	GO:0002066	columnar/cuboidal epithelial cell development	19_GO:0032502 developmental process	-5	5.4	6.2	30211	36	1550	10	0.65	0.2	579|639|652|1000|3091|3202|5916|6608|7474|28514	NKX3-2|PRDM1|BMP4|CDH2|HIF1A|HOXA5|RARG|SMO|WNT5A|DLL1	-3.5	MyList
GO Biological Processes	19	GO:1904892	regulation of receptor signaling pathway via STAT	19_GO:0023052 signaling	-5	3.5	5.6	30211	88	1550	16	1	0.26	2149|3569|3575|3718|3815|5468|5788|6352|7124|8835|9021|10019|11009|54625|282618|407006	F2R|IL6|IL7R|JAK3|KIT|PPARG|PTPRC|CCL5|TNF|SOCS2|SOCS3|SH2B3|IL24|PARP14|IFNL1|MIR221	-3.5	MyList
GO Biological Processes	19	GO:0010631	epithelial cell migration	19_GO:0040011 locomotion	-5	3.5	5.6	30211	88	1550	16	1	0.26	25|1803|1948|2050|2247|3397|3815|3964|6091|7422|9404|9839|23129|57449|84830|154796	ABL1|DPP4|EFNB2|EPHB4|FGF2|ID1|KIT|LGALS8|ROBO1|VEGFA|LPXN|ZEB2|PLXND1|PLEKHG5|ADTRP|AMOT	-3.5	MyList
GO Biological Processes	19	GO:0071456	cellular response to hypoxia	19_GO:0050896 response to stimulus	-5	3	5.4	30211	129	1550	20	1.3	0.29	205|360|1263|1906|3091|4824|5163|5468|5743|6326|6781|7422|8837|10397|28984|54583|79625|84709|114769|114990	AK4|AQP3|PLK3|EDN1|HIF1A|NKX3-1|PDK1|PPARG|PTGS2|SCN2A|STC1|VEGFA|CFLAR|NDRG1|RGCC|EGLN1|NDNF|MGARP|CARD16|VASN	-3.5	MyList
Reactome Gene Sets	6	R-HSA-5669034	TNFs bind their physiological receptors		-5	6	6.3	30211	29	1550	9	0.58	0.19	3604|4982|7133|7292|8718|8784|8995|10673|60401	TNFRSF9|TNFRSF11B|TNFRSF1B|TNFSF4|TNFRSF25|TNFRSF18|TNFSF18|TNFSF13B|EDA2R	-3.5	MyList
KEGG Pathway	24	hsa05161	Hepatitis B		-5	2.8	5.2	30211	162	1550	23	1.5	0.31	637|843|3569|3576|3665|3718|4318|4615|4790|4792|5293|5606|6772|6773|6775|6776|7043|7098|7124|9586|9641|23586|64135	BID|CASP10|IL6|CXCL8|IRF7|JAK3|MMP9|MYD88|NFKB1|NFKBIA|PIK3CD|MAP2K3|STAT1|STAT2|STAT4|STAT5A|TGFB3|TLR3|TNF|CREB5|IKBKE|DDX58|IFIH1	-3.5	MyList
WikiPathways	27	WP4658	Small cell lung cancer		-5	3.4	5.5	30211	98	1550	17	1.1	0.26	329|330|637|1028|1647|3655|3674|3909|3911|3914|3918|4790|4792|4793|5293|5743|7185	BIRC2|BIRC3|BID|CDKN1C|GADD45A|ITGA6|ITGA2B|LAMA3|LAMA5|LAMB3|LAMC2|NFKB1|NFKBIA|NFKBIB|PIK3CD|PTGS2|TRAF1	-3.5	MyList
GO Biological Processes	19	GO:0051348	negative regulation of transferase activity	19_GO:0065007 biological regulation	-5	2.3	5	30211	270	1550	32	2.1	0.36	25|103|135|634|652|859|868|1028|1647|3553|4067|5468|5788|5794|5800|5997|7023|7026|7128|7453|9052|10019|10636|26191|28951|79007|84101|90007|93649|124790|151636|374462	ABL1|ADAR|ADORA2A|CEACAM1|BMP4|CAV3|CBLB|CDKN1C|GADD45A|IL1B|LYN|PPARG|PTPRC|PTPRH|PTPRO|RGS2|TFAP4|NR2F2|TNFAIP3|WARS1|GPRC5A|SH2B3|RGS14|PTPN22|TRIB2|DBNDD1|USP44|MIDN|MYOCD|HEXIM2|DTX3L|PTPRQ	-3.5	MyList
GO Biological Processes	19	GO:0051928	positive regulation of calcium ion transport	19_GO:0051179 localization	-5	3.1	5.4	30211	119	1550	19	1.2	0.28	25|490|623|783|784|825|2149|2852|3306|3627|3718|5026|6347|6348|6351|6352|6373|6781|7225	ABL1|ATP2B1|BDKRB1|CACNB2|CACNB3|CAPN3|F2R|GPER1|HSPA2|CXCL10|JAK3|P2RX5|CCL2|CCL3|CCL4|CCL5|CXCL11|STC1|TRPC6	-3.5	MyList
GO Biological Processes	19	GO:0050804	modulation of chemical synaptic transmission	19_GO:0023052 signaling	-5	2	4.9	30211	428	1550	44	2.8	0.42	25|134|135|627|783|999|1000|1759|1906|2670|2852|3351|3553|3815|4130|4803|5021|5270|5552|5641|5743|5999|6347|6623|7124|7779|8564|9162|9294|9890|10458|10636|10769|22943|22999|23236|25837|27253|51738|80863|81832|84866|112476|112755	ABL1|ADORA1|ADORA2A|BDNF|CACNB2|CDH1|CDH2|DNM1|EDN1|GFAP|GPER1|HTR1B|IL1B|KIT|MAP1A|NGF|OXTR|SERPINE2|SRGN|LGMN|PTGS2|RGS4|CCL2|SNCG|TNF|SLC30A1|KMO|DGKI|S1PR2|PLPPR4|BAIAP2|RGS14|PLK2|DKK1|RIMS1|PLCB1|RAB26|PCDH17|GHRL|PRRT1|NETO1|TMEM25|PRRT2|STX1B	-3.5	MyList
GO Biological Processes	19	GO:0034765	regulation of ion transmembrane transport	19_GO:0051179 localization	-5	1.9	4.8	30211	483	1550	48	3.1	0.44	25|88|623|783|784|825|859|1080|1520|1906|2149|2697|2852|3306|3460|3627|3755|3764|3772|3781|3787|4067|4318|4987|5142|5997|5999|6236|6326|6335|6347|6373|7124|7225|7779|8912|9022|9722|10105|11151|23072|57463|57520|80863|81832|130497|154043|338440	ABL1|ACTN2|BDKRB1|CACNB2|CACNB3|CAPN3|CAV3|CFTR|CTSS|EDN1|F2R|GJA1|GPER1|HSPA2|IFNGR2|CXCL10|KCNG1|KCNJ8|KCNJ15|KCNN2|KCNS1|LYN|MMP9|OPRL1|PDE4B|RGS2|RGS4|RRAD|SCN2A|SCN9A|CCL2|CXCL11|TNF|TRPC6|SLC30A1|CACNA1H|CLIC3|NOS1AP|PPIF|CORO1A|HECW1|AMIGO1|HECW2|PRRT1|NETO1|OSR1|CNKSR3|ANO9	-3.5	MyList
GO Biological Processes	19	GO:0045428	regulation of nitric oxide biosynthetic process	19_GO:0008152 metabolic process	-5	4.2	5.7	30211	61	1550	13	0.84	0.23	445|947|961|1906|3553|5743|5806|6648|7124|9314|9722|10333|80149	ASS1|CD34|CD47|EDN1|IL1B|PTGS2|PTX3|SOD2|TNF|KLF4|NOS1AP|TLR6|ZC3H12A	-3.5	MyList
GO Biological Processes	19	GO:0071453	cellular response to oxygen levels	19_GO:0050896 response to stimulus	-5	2.8	5.2	30211	152	1550	22	1.4	0.3	205|360|1263|1906|2308|3091|4654|4824|5163|5468|5743|6326|6781|7422|8837|10397|28984|54583|79625|84709|114769|114990	AK4|AQP3|PLK3|EDN1|FOXO1|HIF1A|MYOD1|NKX3-1|PDK1|PPARG|PTGS2|SCN2A|STC1|VEGFA|CFLAR|NDRG1|RGCC|EGLN1|NDNF|MGARP|CARD16|VASN	-3.5	MyList
Reactome Gene Sets	6	R-HSA-73887	Death Receptor Signalling		-5	2.9	5.3	30211	141	1550	21	1.4	0.29	329|330|843|1540|4615|4790|4792|4803|7124|7128|7185|8743|8767|8795|8837|9099|10616|26084|57449|65078|257397	BIRC2|BIRC3|CASP10|CYLD|MYD88|NFKB1|NFKBIA|NGF|TNF|TNFAIP3|TRAF1|TNFSF10|RIPK2|TNFRSF10B|CFLAR|USP2|RBCK1|ARHGEF26|PLEKHG5|RTN4R|TAB3	-3.5	MyList
WikiPathways	27	WP2806	Complement system		-5	3.3	5.4	30211	99	1550	17	1.1	0.26	133|629|715|716|717|718|719|1634|2161|2769|3075|3383|3674|3818|3911|5329|5806	ADM|CFB|C1R|C1S|C2|C3|C3AR1|DCN|F12|GNA15|CFH|ICAM1|ITGA2B|KLKB1|LAMA5|PLAUR|PTX3	-3.5	MyList
GO Biological Processes	19	GO:0072009	nephron epithelium development	19_GO:0032502 developmental process	-5	3.3	5.4	30211	99	1550	17	1.1	0.26	652|947|2247|2668|3911|5087|5800|6608|6662|7477|9863|10409|26249|28514|28999|130497|282679	BMP4|CD34|FGF2|GDNF|LAMA5|PBX1|PTPRO|SMO|SOX9|WNT7B|MAGI2|BASP1|KLHL3|DLL1|KLF15|OSR1|AQP11	-3.5	MyList
KEGG Pathway	24	hsa04015	Rap1 signaling pathway		-5	2.5	5.1	30211	210	1550	27	1.7	0.33	135|999|1435|1942|2149|2247|2252|2321|3397|3674|3815|4803|5156|5293|5330|5606|5900|7422|7424|9223|9863|10235|10636|23236|27006|50855|196883	ADORA2A|CDH1|CSF1|EFNA1|F2R|FGF2|FGF7|FLT1|ID1|ITGA2B|KIT|NGF|PDGFRA|PIK3CD|PLCB2|MAP2K3|RALGDS|VEGFA|VEGFC|MAGI1|MAGI2|RASGRP2|RGS14|PLCB1|FGF22|PARD6A|ADCY4	-3.5	MyList
GO Biological Processes	19	GO:0099177	regulation of trans-synaptic signaling	19_GO:0023052 signaling	-5	2	4.8	30211	429	1550	44	2.8	0.42	25|134|135|627|783|999|1000|1759|1906|2670|2852|3351|3553|3815|4130|4803|5021|5270|5552|5641|5743|5999|6347|6623|7124|7779|8564|9162|9294|9890|10458|10636|10769|22943|22999|23236|25837|27253|51738|80863|81832|84866|112476|112755	ABL1|ADORA1|ADORA2A|BDNF|CACNB2|CDH1|CDH2|DNM1|EDN1|GFAP|GPER1|HTR1B|IL1B|KIT|MAP1A|NGF|OXTR|SERPINE2|SRGN|LGMN|PTGS2|RGS4|CCL2|SNCG|TNF|SLC30A1|KMO|DGKI|S1PR2|PLPPR4|BAIAP2|RGS14|PLK2|DKK1|RIMS1|PLCB1|RAB26|PCDH17|GHRL|PRRT1|NETO1|TMEM25|PRRT2|STX1B	-3.5	MyList
GO Biological Processes	19	GO:0002706	regulation of lymphocyte mediated immunity	19_GO:0002376 immune system process	-5	2.7	5.2	30211	175	1550	24	1.5	0.31	196|634|718|1379|3106|3133|3134|3553|3569|3575|3592|3594|3902|3965|5788|6318|7124|7133|7292|7855|91543|114548|200558|259307	AHR|CEACAM1|C3|CR1L|HLA-B|HLA-E|HLA-F|IL1B|IL6|IL7R|IL12A|IL12RB1|LAG3|LGALS9|PTPRC|SERPINB4|TNF|TNFRSF1B|TNFSF4|FZD5|RSAD2|NLRP3|APLF|IL4I1	-3.5	MyList
Reactome Gene Sets	6	R-HSA-1810476	RIP-mediated NFkB activation via ZBP1		-4.9	8	6.7	30211	17	1550	7	0.45	0.17	4615|4790|4791|4792|4793|7098|81030	MYD88|NFKB1|NFKB2|NFKBIA|NFKBIB|TLR3|ZBP1	-3.5	MyList
WikiPathways	27	WP4462	Platelet-mediated interactions with vascular and circulating cells		-4.9	8	6.7	30211	17	1550	7	0.45	0.17	3383|3553|6347|6352|7043|7412|51284	ICAM1|IL1B|CCL2|CCL5|TGFB3|VCAM1|TLR7	-3.5	MyList
WikiPathways	27	WP4493	Cells and molecules involved in local acute inflammatory response		-4.9	8	6.7	30211	17	1550	7	0.45	0.17	718|3383|3552|3569|3576|7124|7412	C3|ICAM1|IL1A|IL6|CXCL8|TNF|VCAM1	-3.5	MyList
KEGG Pathway	24	hsa05131	Shigellosis		-4.9	2.4	5	30211	247	1550	30	1.9	0.35	718|834|837|960|1437|2308|3099|3553|3576|3709|4615|4790|4792|4793|5293|5330|6352|7124|8356|8767|10318|10616|23236|54874|57180|84812|92610|113026|114548|257397	C3|CASP1|CASP4|CD44|CSF2|FOXO1|HK2|IL1B|CXCL8|ITPR2|MYD88|NFKB1|NFKBIA|NFKBIB|PIK3CD|PLCB2|CCL5|TNF|H3C12|RIPK2|TNIP1|RBCK1|PLCB1|FNBP1L|ACTR3B|PLCD4|TIFA|PLCD3|NLRP3|TAB3	-3.4	MyList
GO Biological Processes	19	GO:0032693	negative regulation of interleukin-10 production	19_GO:0048519 negative regulation of biological process	-4.9	6.8	6.4	30211	23	1550	8	0.52	0.18	3620|3718|27242|28514|28951|29126|64115|80380	IDO1|JAK3|TNFRSF21|DLL1|TRIB2|CD274|VSIR|PDCD1LG2	-3.4	MyList
GO Biological Processes	19	GO:0030212	hyaluronan metabolic process	19_GO:0008152 metabolic process	-4.9	6.8	6.4	30211	23	1550	8	0.52	0.18	960|2247|3037|3038|3553|3699|7130|23670	CD44|FGF2|HAS2|HAS3|IL1B|ITIH3|TNFAIP6|CEMIP2	-3.4	MyList
GO Biological Processes	19	GO:0046903	secretion	19_GO:0051179 localization	-4.9	1.9	4.8	30211	485	1550	48	3.1	0.44	19|133|624|1080|1437|1906|1952|2252|2697|3091|3099|3177|3569|3624|3815|4067|4160|5021|5270|5293|6348|6352|6355|6583|6623|6776|7127|7421|7422|7462|8013|8825|8835|8862|9751|11151|22999|25837|51738|54843|57829|80223|83851|91828|94122|112476|112755|283849	ABCA1|ADM|BDKRB2|CFTR|CSF2|EDN1|CELSR2|FGF7|GJA1|HIF1A|HK2|SLC29A2|IL6|INHBA|KIT|LYN|MC4R|OXTR|SERPINE2|PIK3CD|CCL3|CCL5|CCL8|SLC22A4|SNCG|STAT5A|TNFAIP2|VDR|VEGFA|LAT2|NR4A3|LIN7A|SOCS2|APLN|SNPH|CORO1A|RIMS1|RAB26|GHRL|SYTL2|ZP4|RAB11FIP1|SYT16|EXOC3L4|SYTL5|PRRT2|STX1B|EXOC3L1	-3.4	MyList
GO Biological Processes	19	GO:0060341	regulation of cellular localization	19_GO:0051179 localization	-4.9	1.7	4.7	30211	788	1550	69	4.5	0.52	25|88|367|623|627|652|825|859|999|1000|1080|1263|1410|2044|2149|2619|2624|2633|2852|3091|3553|3598|3627|3936|3965|3976|4067|4130|4323|4600|5026|5357|5371|5743|6373|6608|6672|7124|7130|7855|8111|10347|10938|11151|22885|23255|23286|25893|27253|29775|50855|51738|55022|59353|65009|79628|80128|80149|83666|89866|89958|91461|116372|125170|131578|137886|151636|160622|221914	ABL1|ACTN2|AR|BDKRB1|BDNF|BMP4|CAPN3|CAV3|CDH1|CDH2|CFTR|PLK3|CRYAB|EPHA5|F2R|GAS1|GATA2|GBP1|GPER1|HIF1A|IL1B|IL13RA2|CXCL10|LCP1|LGALS9|LIF|LYN|MAP1A|MMP14|MX2|P2RX5|PLS1|PML|PTGS2|CXCL11|SMO|SP100|TNF|TNFAIP6|FZD5|GPR68|ABCA7|EHD1|CORO1A|ABLIM3|MTCL1|WWC1|TRIM58|PCDH17|CARD10|PARD6A|GHRL|PID1|TMEM35A|NDRG4|SH3TC2|TRIM46|ZC3H12A|PARP9|SEC16B|SAPCD2|PKDCC|LYPD1|MIEF2|LRRC15|UBXN2B|DTX3L|TAMALIN|…	-3.4	MyList
WikiPathways	27	WP3614	Photodynamic therapy-induced HIF-1 survival signaling		-4.9	5.3	6	30211	37	1550	10	0.65	0.2	597|637|1906|3091|5054|5743|6513|7043|7422|54583	BCL2A1|BID|EDN1|HIF1A|SERPINE1|PTGS2|SLC2A1|TGFB3|VEGFA|EGLN1	-3.4	MyList
GO Biological Processes	19	GO:0003176	aortic valve development	19_GO:0032502 developmental process	-4.9	5.3	6	30211	37	1550	10	0.65	0.2	652|1942|2006|6091|6591|6615|6662|7133|23462|54567	BMP4|EFNA1|ELN|ROBO1|SNAI2|SNAI1|SOX9|TNFRSF1B|HEY1|DLL4	-3.4	MyList
WikiPathways	27	WP4331	Neovascularisation processes		-4.9	5.3	6	30211	37	1550	10	0.65	0.2	2050|3091|3815|4093|4318|4790|4791|5971|7043|54567	EPHB4|HIF1A|KIT|SMAD9|MMP9|NFKB1|NFKB2|RELB|TGFB3|DLL4	-3.4	MyList
GO Biological Processes	19	GO:0071674	mononuclear cell migration	19_GO:0040011 locomotion	-4.9	3.2	5.3	30211	110	1550	18	1.2	0.27	1901|2321|3383|3569|3627|3695|5293|5800|6288|6347|6348|6351|6352|6354|6355|6364|6373|58191	S1PR1|FLT1|ICAM1|IL6|CXCL10|ITGB7|PIK3CD|PTPRO|SAA1|CCL2|CCL3|CCL4|CCL5|CCL7|CCL8|CCL20|CXCL11|CXCL16	-3.4	MyList
GO Biological Processes	19	GO:0007548	sex differentiation	19_GO:0022414 reproductive process	-4.9	2.3	5	30211	273	1550	32	2.1	0.36	367|668|1051|1588|2069|2295|2697|3206|3309|3623|3624|3815|4323|4824|5087|5156|5806|6662|6665|7026|7098|7130|7422|7474|8531|10184|10409|22836|56956|63951|130497|157506	AR|FOXL2|CEBPB|CYP19A1|EREG|FOXF2|GJA1|HOXA10|HSPA5|INHA|INHBA|KIT|MMP14|NKX3-1|PBX1|PDGFRA|PTX3|SOX9|SOX15|NR2F2|TLR3|TNFAIP6|VEGFA|WNT5A|YBX3|LHFPL2|BASP1|RHOBTB3|LHX9|DMRTA1|OSR1|RDH10	-3.4	MyList
GO Biological Processes	19	GO:0097191	extrinsic apoptotic signaling pathway	19_GO:0023052 signaling	-4.9	3.5	5.4	30211	90	1550	16	1	0.26	597|637|2065|3552|3553|3592|3624|3875|4803|5371|7098|7124|7133|8795|10017|50486	BCL2A1|BID|ERBB3|IL1A|IL1B|IL12A|INHBA|KRT18|NGF|PML|TLR3|TNF|TNFRSF1B|TNFRSF10B|BCL2L10|G0S2	-3.4	MyList
Reactome Gene Sets	6	R-HSA-1474290	Collagen formation		-4.9	3.5	5.4	30211	90	1550	16	1	0.26	1294|1300|1308|1520|3655|3909|3914|3918|4015|4314|4318|7092|8974|55214|85301|255631	COL7A1|COL10A1|COL17A1|CTSS|ITGA6|LAMA3|LAMB3|LAMC2|LOX|MMP3|MMP9|TLL1|P4HA2|P3H2|COL27A1|COL24A1	-3.4	MyList
GO Biological Processes	19	GO:0046545	development of primary female sexual characteristics	19_GO:0022414 reproductive process	-4.9	3.3	5.4	30211	100	1550	17	1.1	0.26	668|1051|1588|2069|3309|3623|3624|3815|4323|5156|5806|7026|7130|7422|10184|56956|63951	FOXL2|CEBPB|CYP19A1|EREG|HSPA5|INHA|INHBA|KIT|MMP14|PDGFRA|PTX3|NR2F2|TNFAIP6|VEGFA|LHFPL2|LHX9|DMRTA1	-3.4	MyList
GO Biological Processes	19	GO:0031345	negative regulation of cell projection organization	19_GO:0048519 negative regulation of biological process	-4.9	2.6	5.1	30211	188	1550	25	1.6	0.32	1942|1948|2670|3397|4155|5800|6911|7025|7474|7869|10512|22891|22943|23251|23258|27124|57715|64218|65078|80128|83478|112755|157285|223117|349667	EFNA1|EFNB2|GFAP|ID1|MBP|PTPRO|TBX6|NR2F1|WNT5A|SEMA3B|SEMA3C|ZNF365|DKK1|MINAR1|DENND5A|INPP5J|SEMA4G|SEMA4A|RTN4R|TRIM46|ARHGAP24|STX1B|PRAG1|SEMA3D|RTN4RL2	-3.4	MyList
GO Biological Processes	19	GO:0051639	actin filament network formation	19_GO:0009987 cellular process	-4.9	9.7	7	30211	12	1550	6	0.39	0.16	3936|5357|29109|55604|80206|146206	LCP1|PLS1|FHOD1|CARMIL1|FHOD3|CARMIL2	-3.4	MyList
GO Biological Processes	19	GO:0030656	regulation of vitamin metabolic process	19_GO:0008152 metabolic process	-4.9	9.7	7	30211	12	1550	6	0.39	0.16	1594|4790|6591|6615|7124|157506	CYP27B1|NFKB1|SNAI2|SNAI1|TNF|RDH10	-3.4	MyList
GO Biological Processes	19	GO:0031650	regulation of heat generation	19_GO:0032501 multicellular organismal process	-4.9	9.7	7	30211	12	1550	6	0.39	0.16	18|3553|5743|7124|9536|57561	ABAT|IL1B|PTGS2|TNF|PTGES|ARRDC3	-3.4	MyList
WikiPathways	27	WP3929	Chemokine signaling pathway		-4.9	2.7	5.1	30211	165	1550	23	1.5	0.31	2869|2921|3627|3718|4067|4790|4792|4793|5293|5330|6348|6351|6352|6354|6364|6373|6374|6772|6773|10235|23236|58191|196883	GRK5|CXCL3|CXCL10|JAK3|LYN|NFKB1|NFKBIA|NFKBIB|PIK3CD|PLCB2|CCL3|CCL4|CCL5|CCL7|CCL20|CXCL11|CXCL5|STAT1|STAT2|RASGRP2|PLCB1|CXCL16|ADCY4	-3.4	MyList
GO Biological Processes	19	GO:0061037	negative regulation of cartilage development	19_GO:0032502 developmental process	-4.9	5.8	6.2	30211	30	1550	9	0.58	0.19	579|652|5744|5916|6591|6662|8200|81792|144347	NKX3-2|BMP4|PTHLH|RARG|SNAI2|SOX9|GDF5|ADAMTS12|RFLNA	-3.4	MyList
Reactome Gene Sets	6	R-HSA-5357956	TNFR1-induced NFkappaB signaling pathway		-4.9	5.8	6.2	30211	30	1550	9	0.58	0.19	329|330|1540|7124|7128|7185|9099|10616|257397	BIRC2|BIRC3|CYLD|TNF|TNFAIP3|TRAF1|USP2|RBCK1|TAB3	-3.4	MyList
GO Biological Processes	19	GO:0070302	regulation of stress-activated protein kinase signaling cascade	19_GO:0023052 signaling	-4.9	2.5	5.1	30211	200	1550	26	1.7	0.33	652|859|1540|1647|2308|3552|3553|4067|4217|4615|5610|7098|7124|7185|7422|7474|7477|8767|9464|23236|26191|55504|60401|80149|153769|344558	BMP4|CAV3|CYLD|GADD45A|FOXO1|IL1A|IL1B|LYN|MAP3K5|MYD88|EIF2AK2|TLR3|TNF|TRAF1|VEGFA|WNT5A|WNT7B|RIPK2|HAND2|PLCB1|PTPN22|TNFRSF19|EDA2R|ZC3H12A|SH3RF2|SH3RF3	-3.4	MyList
GO Biological Processes	19	GO:0060627	regulation of vesicle-mediated transport	19_GO:0051179 localization	-4.9	1.9	4.7	30211	529	1550	51	3.3	0.45	25|88|135|341|634|717|718|783|859|961|1080|1948|2207|2619|2624|3134|3351|3553|3598|3601|3965|4067|5054|5337|5359|5533|5788|5806|5874|6347|7124|7422|7474|8862|8912|9863|9882|10188|10347|10938|11037|11151|22943|25837|28514|65009|91461|112476|112755|124930|160622	ABL1|ACTN2|ADORA2A|APOC1|CEACAM1|C2|C3|CACNB2|CAV3|CD47|CFTR|EFNB2|FCER1G|GAS1|GATA2|HLA-F|HTR1B|IL1B|IL13RA2|IL15RA|LGALS9|LYN|SERPINE1|PLD1|PLSCR1|PPP3CC|PTPRC|PTX3|RAB27B|CCL2|TNF|VEGFA|WNT5A|APLN|CACNA1H|MAGI2|TBC1D4|TNK2|ABCA7|EHD1|STON1|CORO1A|DKK1|RAB26|DLL1|NDRG4|PKDCC|PRRT2|STX1B|ANKRD13B|TAMALIN	-3.4	MyList
GO Biological Processes	19	GO:0050770	regulation of axonogenesis	19_GO:0032502 developmental process	-4.9	2.8	5.2	30211	154	1550	22	1.4	0.3	627|1000|1942|2049|4155|4803|5364|6091|6474|7422|7474|7504|7869|10512|23129|57463|57715|64218|65078|80128|114798|223117	BDNF|CDH2|EFNA1|EPHB3|MBP|NGF|PLXNB1|ROBO1|SHOX2|VEGFA|WNT5A|XK|SEMA3B|SEMA3C|PLXND1|AMIGO1|SEMA4G|SEMA4A|RTN4R|TRIM46|SLITRK1|SEMA3D	-3.4	MyList
WikiPathways	27	WP4666	Hepatitis B infection		-4.9	2.8	5.2	30211	154	1550	22	1.4	0.3	637|843|3569|3576|3665|3718|4318|4615|4790|5293|5606|6772|6773|6775|6776|7043|7098|7124|9586|9641|23586|64135	BID|CASP10|IL6|CXCL8|IRF7|JAK3|MMP9|MYD88|NFKB1|PIK3CD|MAP2K3|STAT1|STAT2|STAT4|STAT5A|TGFB3|TLR3|TNF|CREB5|IKBKE|DDX58|IFIH1	-3.4	MyList
GO Biological Processes	19	GO:0001656	metanephros development	19_GO:0032502 developmental process	-4.9	3.6	5.5	30211	81	1550	15	0.97	0.25	231|652|947|2668|3399|4824|5156|6608|6662|6772|7477|10409|116039|130497|157506	AKR1B1|BMP4|CD34|GDNF|ID3|NKX3-1|PDGFRA|SMO|SOX9|STAT1|WNT7B|BASP1|OSR2|OSR1|RDH10	-3.4	MyList
GO Biological Processes	19	GO:0030500	regulation of bone mineralization	19_GO:0110148 biomineralization	-4.9	3.6	5.5	30211	81	1550	15	0.97	0.25	490|652|1594|1901|2697|3091|5552|6348|6662|7043|9636|91461|116039|130497|144347	ATP2B1|BMP4|CYP27B1|S1PR1|GJA1|HIF1A|SRGN|CCL3|SOX9|TGFB3|ISG15|PKDCC|OSR2|OSR1|RFLNA	-3.4	MyList
GO Biological Processes	19	GO:0050803	regulation of synapse structure or activity	19_GO:0065007 biological regulation	-4.8	2.5	5	30211	213	1550	27	1.7	0.33	25|627|1000|1942|2049|2823|5021|5552|5800|7124|7474|8828|10458|22865|22943|26050|51738|57463|64218|78999|79012|112755|114798|139065|145581|347731|347902	ABL1|BDNF|CDH2|EFNA1|EPHB3|GPM6A|OXTR|SRGN|PTPRO|TNF|WNT5A|NRP2|BAIAP2|SLITRK3|DKK1|SLITRK5|GHRL|AMIGO1|SEMA4A|LRFN4|CAMKV|STX1B|SLITRK1|SLITRK4|LRFN5|LRRTM3|AMIGO2	-3.4	MyList
GO Biological Processes	19	GO:0045638	negative regulation of myeloid cell differentiation	19_GO:0002376 immune system process	-4.8	3.4	5.4	30211	91	1550	16	1	0.26	634|2624|3202|3204|3205|3623|3624|4067|4211|4792|6348|7098|7130|8111|8359|28514	CEACAM1|GATA2|HOXA5|HOXA7|HOXA9|INHA|INHBA|LYN|MEIS1|NFKBIA|CCL3|TLR3|TNFAIP6|GPR68|H4C1|DLL1	-3.4	MyList
GO Biological Processes	19	GO:0070664	negative regulation of leukocyte proliferation	19_GO:0048519 negative regulation of biological process	-4.8	3.4	5.4	30211	91	1550	16	1	0.26	652|868|1051|3620|3965|4067|6355|7128|7940|10385|27242|29126|64115|80380|90865|259307	BMP4|CBLB|CEBPB|IDO1|LGALS9|LYN|CCL8|TNFAIP3|LST1|BTN2A2|TNFRSF21|CD274|VSIR|PDCD1LG2|IL33|IL4I1	-3.4	MyList
GO Biological Processes	19	GO:0090132	epithelium migration	19_GO:0032501 multicellular organismal process	-4.8	3.4	5.4	30211	91	1550	16	1	0.26	25|1803|1948|2050|2247|3397|3815|3964|6091|7422|9404|9839|23129|57449|84830|154796	ABL1|DPP4|EFNB2|EPHB4|FGF2|ID1|KIT|LGALS8|ROBO1|VEGFA|LPXN|ZEB2|PLXND1|PLEKHG5|ADTRP|AMOT	-3.4	MyList
GO Biological Processes	19	GO:0003158	endothelium development	19_GO:0032502 developmental process	-4.8	3.4	5.4	30211	91	1550	16	1	0.26	652|947|1901|3084|3215|3383|4615|6781|7026|23135|23462|26084|28514|54538|54567|55897	BMP4|CD34|S1PR1|NRG1|HOXB5|ICAM1|MYD88|STC1|NR2F2|KDM6B|HEY1|ARHGEF26|DLL1|ROBO4|DLL4|MESP1	-3.4	MyList
GO Biological Processes	19	GO:0002366	leukocyte activation involved in immune response	19_GO:0002376 immune system process	-4.8	2.6	5.1	30211	178	1550	24	1.5	0.31	25|972|2207|3383|3430|3569|3815|3936|4067|4615|4683|5293|5734|5971|6348|7462|8013|8995|9111|11151|11277|27086|28514|64218	ABL1|CD74|FCER1G|ICAM1|IFI35|IL6|KIT|LCP1|LYN|MYD88|NBN|PIK3CD|PTGER4|RELB|CCL3|LAT2|NR4A3|TNFSF18|NMI|CORO1A|TREX1|FOXP1|DLL1|SEMA4A	-3.4	MyList
GO Biological Processes	19	GO:0002062	chondrocyte differentiation	19_GO:0032502 developmental process	-4.8	3.8	5.5	30211	72	1550	14	0.9	0.24	652|861|5745|5916|6474|6662|8091|23516|55553|81792|85301|116039|130497|389125	BMP4|RUNX1|PTH1R|RARG|SHOX2|SOX9|HMGA2|SLC39A14|SOX6|ADAMTS12|COL27A1|OSR2|OSR1|MUSTN1	-3.4	MyList
[truncated: 1,620 more rows]
