# Supplementary material for: Inflammatory Cytokine-Induced HIF-1 Activation Promotes Epithelial–Mesenchymal Transition in Endometrial Epithelial Cells
Source: Biomedicines. 2023 Jan 14;11(1):210. doi: 10.3390/biomedicines11010210 (PMC9855875; doi:10.3390/biomedicines11010210)
Supplement: Supplementary file 1 [file biomedicines-11-00210-s001.zip › Table_S3.csv]

Category	CategoryID	GO	Description	PARENT_GO	LogP	Enrichment	Z-score	#TotalGeneInLibrary	#GeneInGO	#GeneInHitList	#GeneInGOAndHitList	%InGO	STDV %InGO	GeneID	Hits	Log(q-value)	GeneList
Canonical Pathways	11	M255	PID HIF1 TFPATHWAY		-12	39	18	28160	66	99	9	9.1	2.9	133|3099|3939|5209|6513|7422|10397|54583|79365	ADM|HK2|LDHA|PFKFB3|SLC2A1|VEGFA|NDRG1|EGLN1|BHLHE41	-7.4	MyList
GO Biological Processes	19	GO:0001666	response to hypoxia	19_GO:0050896 response to stimulus	-11	13	13	28160	307	99	14	14	3.5	133|205|3099|3939|5163|5328|5352|6513|6781|7422|10397|51129|54541|54583	ADM|AK4|HK2|LDHA|PDK1|PLAU|PLOD2|SLC2A1|STC1|VEGFA|NDRG1|ANGPTL4|DDIT4|EGLN1	-7.3	MyList
GO Biological Processes	19	GO:0036293	response to decreased oxygen levels	19_GO:0050896 response to stimulus	-11	12	12	28160	322	99	14	14	3.5	133|205|3099|3939|5163|5328|5352|6513|6781|7422|10397|51129|54541|54583	ADM|AK4|HK2|LDHA|PDK1|PLAU|PLOD2|SLC2A1|STC1|VEGFA|NDRG1|ANGPTL4|DDIT4|EGLN1	-7.2	MyList
GO Biological Processes	19	GO:0070482	response to oxygen levels	19_GO:0050896 response to stimulus	-11	11	12	28160	347	99	14	14	3.5	133|205|3099|3939|5163|5328|5352|6513|6781|7422|10397|51129|54541|54583	ADM|AK4|HK2|LDHA|PDK1|PLAU|PLOD2|SLC2A1|STC1|VEGFA|NDRG1|ANGPTL4|DDIT4|EGLN1	-6.9	MyList
WikiPathways	27	WP3859	TGF-beta signaling in thyroid cells for epithelial-mesenchymal transition		-8.4	79	20	28160	18	99	5	5.1	2.2	1000|2335|6591|6615|7431	CDH2|FN1|SNAI2|SNAI1|VIM	-4.7	MyList
WikiPathways	27	WP4206	Hereditary leiomyomatosis and renal cell carcinoma pathway		-8.1	71	19	28160	20	99	5	5.1	2.2	3939|5163|6513|7422|54583	LDHA|PDK1|SLC2A1|VEGFA|EGLN1	-4.6	MyList
GO Biological Processes	19	GO:2000810	regulation of bicellular tight junction assembly	19_GO:0050789 regulation of biological process	-7.8	62	17	28160	23	99	5	5.1	2.2	6591|6615|7082|7124|9076	SNAI2|SNAI1|TJP1|TNF|CLDN1	-4.3	MyList
GO Biological Processes	19	GO:0042060	wound healing	19_GO:0050896 response to stimulus	-7.5	8.1	8.7	28160	424	99	12	12	3.3	2069|2161|2335|5055|5328|5864|7006|7124|7422|9076|9241|25987	EREG|F12|FN1|SERPINB2|PLAU|RAB3A|TEC|TNF|VEGFA|CLDN1|NOG|TSKU	-4	MyList
Canonical Pathways	11	M5885	NABA MATRISOME ASSOCIATED		-7.2	5.7	7.7	28160	751	99	15	15	3.6	1437|2069|2161|2256|5055|5328|5352|5365|6347|7124|7422|9518|51129|54583|113791	CSF2|EREG|F12|FGF11|SERPINB2|PLAU|PLOD2|PLXNB3|CCL2|TNF|VEGFA|GDF15|ANGPTL4|EGLN1|PIK3IP1	-3.8	MyList
GO Biological Processes	19	GO:0009611	response to wounding	19_GO:0050896 response to stimulus	-7.1	6.7	8	28160	552	99	13	13	3.4	133|2069|2161|2335|5055|5328|5864|7006|7124|7422|9076|9241|25987	ADM|EREG|F12|FN1|SERPINB2|PLAU|RAB3A|TEC|TNF|VEGFA|CLDN1|NOG|TSKU	-3.8	MyList
WikiPathways	27	WP3932	Focal adhesion: PI3K-Akt-mTOR-signaling pathway		-6.8	9.2	8.6	28160	309	99	10	10	3	2256|2335|2997|5209|5210|5526|6513|7422|54541|113791	FGF11|FN1|GYS1|PFKFB3|PFKFB4|PPP2R5B|SLC2A1|VEGFA|DDIT4|PIK3IP1	-3.5	MyList
GO Biological Processes	19	GO:0034330	cell junction organization	19_GO:0009987 cellular process	-6.8	5.7	7.5	28160	695	99	14	14	3.5	1000|2335|5864|6591|6615|7082|7124|7422|8497|9076|9758|10397|91156|389813	CDH2|FN1|RAB3A|SNAI2|SNAI1|TJP1|TNF|VEGFA|PPFIA4|CLDN1|FRMPD4|NDRG1|IGFN1|AJM1	-3.5	MyList
WikiPathways	27	WP3614	Photodynamic therapy-induced HIF-1 survival signaling		-6.7	38	14	28160	37	99	5	5.1	2.2	597|3939|6513|7422|54583	BCL2A1|LDHA|SLC2A1|VEGFA|EGLN1	-3.5	MyList
KEGG Pathway	24	hsa04066	HIF-1 signaling pathway		-6.7	17	10	28160	119	99	7	7.1	2.6	3099|3939|5163|5209|6513|7422|54583	HK2|LDHA|PDK1|PFKFB3|SLC2A1|VEGFA|EGLN1	-3.4	MyList
GO Biological Processes	19	GO:0062012	regulation of small molecule metabolic process	19_GO:0050789 regulation of biological process	-6.5	8.5	8.2	28160	335	99	10	10	3	133|205|5163|5507|6591|6615|7124|51141|54541|648791	ADM|AK4|PDK1|PPP1R3C|SNAI2|SNAI1|TNF|INSIG2|DDIT4|PPP1R3G	-3.3	MyList
GO Biological Processes	19	GO:0045216	cell-cell junction organization	19_GO:0009987 cellular process	-6.2	11	8.7	28160	201	99	8	8.1	2.7	1000|6591|6615|7082|7124|7422|9076|389813	CDH2|SNAI2|SNAI1|TJP1|TNF|VEGFA|CLDN1|AJM1	-3.1	MyList
WikiPathways	27	WP4018	Clear cell renal cell carcinoma pathways		-6.2	20	10	28160	87	99	6	6.1	2.4	3099|3939|5352|6513|7422|79365	HK2|LDHA|PLOD2|SLC2A1|VEGFA|BHLHE41	-3.1	MyList
PANTHER Pathway	28	P00028	Heterotrimeric G-protein signaling pathway-rod outer segment phototransduction		-6.1	1.40E+02	21	28160	6	99	3	3	1.7	629|2161|5328	CFB|F12|PLAU	-3	MyList
GO Biological Processes	19	GO:0048514	blood vessel morphogenesis	19_GO:0032502 developmental process	-6	5.3	6.9	28160	693	99	13	13	3.4	133|1000|2069|2335|3099|6347|7082|7124|7422|8862|9241|51129|54583	ADM|CDH2|EREG|FN1|HK2|CCL2|TJP1|TNF|VEGFA|APLN|NOG|ANGPTL4|EGLN1	-2.9	MyList
GO Biological Processes	19	GO:0050878	regulation of body fluid levels	19_GO:0065007 biological regulation	-6	7.4	7.5	28160	382	99	10	10	3	133|2161|2335|3099|5055|5328|7006|7422|8862|9076	ADM|F12|FN1|HK2|SERPINB2|PLAU|TEC|VEGFA|APLN|CLDN1	-2.9	MyList
GO Biological Processes	19	GO:0060556	regulation of vitamin D biosynthetic process	19_GO:0050789 regulation of biological process	-5.8	1.20E+02	19	28160	7	99	3	3	1.7	6591|6615|7124	SNAI2|SNAI1|TNF	-2.8	MyList
WikiPathways	27	WP4239	Epithelial to mesenchymal transition in colorectal cancer		-5.7	12	8.5	28160	165	99	7	7.1	2.6	1000|2335|6591|6615|7082|9076|9518	CDH2|FN1|SNAI2|SNAI1|TJP1|CLDN1|GDF15	-2.7	MyList
Reactome Gene Sets	6	R-HSA-6785807	Interleukin-4 and Interleukin-13 signaling		-5.6	16	9.2	28160	108	99	6	6.1	2.4	2335|6347|7124|7422|7431|58480	FN1|CCL2|TNF|VEGFA|VIM|RHOU	-2.6	MyList
GO Biological Processes	19	GO:0001568	blood vessel development	19_GO:0032502 developmental process	-5.5	4.8	6.3	28160	771	99	13	13	3.4	133|1000|2069|2335|3099|6347|7082|7124|7422|8862|9241|51129|54583	ADM|CDH2|EREG|FN1|HK2|CCL2|TJP1|TNF|VEGFA|APLN|NOG|ANGPTL4|EGLN1	-2.5	MyList
Canonical Pathways	11	M5883	NABA SECRETED FACTORS		-5.5	7.5	7.2	28160	343	99	9	9.1	2.9	1437|2069|2256|6347|7124|7422|9518|51129|113791	CSF2|EREG|FGF11|CCL2|TNF|VEGFA|GDF15|ANGPTL4|PIK3IP1	-2.5	MyList
GO Biological Processes	19	GO:0005996	monosaccharide metabolic process	19_GO:0008152 metabolic process	-5.4	8.9	7.5	28160	257	99	8	8.1	2.7	3099|5163|5209|5210|5507|6513|7124|648791	HK2|PDK1|PFKFB3|PFKFB4|PPP1R3C|SLC2A1|TNF|PPP1R3G	-2.5	MyList
GO Biological Processes	19	GO:0001885	endothelial cell development	19_GO:0032502 developmental process	-5.3	21	9.7	28160	69	99	5	5.1	2.2	6781|7082|7124|7422|9076	STC1|TJP1|TNF|VEGFA|CLDN1	-2.4	MyList
GO Biological Processes	19	GO:0070830	bicellular tight junction assembly	19_GO:0009987 cellular process	-5.3	20	9.6	28160	70	99	5	5.1	2.2	6591|6615|7082|7124|9076	SNAI2|SNAI1|TJP1|TNF|CLDN1	-2.4	MyList
GO Biological Processes	19	GO:0050810	regulation of steroid biosynthetic process	19_GO:0050789 regulation of biological process	-5.3	20	9.6	28160	70	99	5	5.1	2.2	133|6591|6615|7124|51141	ADM|SNAI2|SNAI1|TNF|INSIG2	-2.4	MyList
GO Biological Processes	19	GO:0045446	endothelial cell differentiation	19_GO:0032502 developmental process	-5.3	14	8.5	28160	123	99	6	6.1	2.4	6781|7082|7124|7422|9076|23135	STC1|TJP1|TNF|VEGFA|CLDN1|KDM6B	-2.4	MyList
GO Biological Processes	19	GO:0042368	vitamin D biosynthetic process	19_GO:0008152 metabolic process	-5.3	85	16	28160	10	99	3	3	1.7	6591|6615|7124	SNAI2|SNAI1|TNF	-2.4	MyList
GO Biological Processes	19	GO:0071396	cellular response to lipid	19_GO:0050896 response to stimulus	-5.2	5.4	6.4	28160	575	99	11	11	3.2	1437|6347|6591|6781|7124|7431|9076|51141|54541|55818|81606	CSF2|CCL2|SNAI2|STC1|TNF|VIM|CLDN1|INSIG2|DDIT4|KDM3A|LBH	-2.4	MyList
GO Biological Processes	19	GO:0030656	regulation of vitamin metabolic process	19_GO:0050789 regulation of biological process	-5.2	78	15	28160	11	99	3	3	1.7	6591|6615|7124	SNAI2|SNAI1|TNF	-2.3	MyList
GO Biological Processes	19	GO:0120192	tight junction assembly	19_GO:0009987 cellular process	-5.2	19	9.3	28160	75	99	5	5.1	2.2	6591|6615|7082|7124|9076	SNAI2|SNAI1|TJP1|TNF|CLDN1	-2.3	MyList
WikiPathways	27	WP3617	Photodynamic therapy-induced NF-kB survival signaling		-5.2	33	11	28160	35	99	4	4	2	597|1437|7124|7422	BCL2A1|CSF2|TNF|VEGFA	-2.3	MyList
GO Biological Processes	19	GO:0044262	cellular carbohydrate metabolic process	19_GO:0008152 metabolic process	-5.1	8	7.1	28160	284	99	8	8.1	2.7	2997|3099|5163|5209|5210|5507|54541|648791	GYS1|HK2|PDK1|PFKFB3|PFKFB4|PPP1R3C|DDIT4|PPP1R3G	-2.3	MyList
GO Biological Processes	19	GO:0005975	carbohydrate metabolic process	19_GO:0008152 metabolic process	-5.1	5.3	6.3	28160	593	99	11	11	3.2	2997|3099|3939|5163|5209|5210|5507|6513|7124|54541|648791	GYS1|HK2|LDHA|PDK1|PFKFB3|PFKFB4|PPP1R3C|SLC2A1|TNF|DDIT4|PPP1R3G	-2.3	MyList
GO Biological Processes	19	GO:0043297	apical junction assembly	19_GO:0009987 cellular process	-5.1	18	9.1	28160	78	99	5	5.1	2.2	6591|6615|7082|7124|9076	SNAI2|SNAI1|TJP1|TNF|CLDN1	-2.3	MyList
GO Biological Processes	19	GO:0001525	angiogenesis	19_GO:0032502 developmental process	-5.1	5.2	6.2	28160	600	99	11	11	3.2	133|2069|2335|3099|6347|7082|7124|7422|8862|51129|54583	ADM|EREG|FN1|HK2|CCL2|TJP1|TNF|VEGFA|APLN|ANGPTL4|EGLN1	-2.3	MyList
GO Biological Processes	19	GO:0120193	tight junction organization	19_GO:0009987 cellular process	-5	18	8.9	28160	81	99	5	5.1	2.2	6591|6615|7082|7124|9076	SNAI2|SNAI1|TJP1|TNF|CLDN1	-2.2	MyList
GO Biological Processes	19	GO:0050678	regulation of epithelial cell proliferation	19_GO:0050789 regulation of biological process	-5	6.5	6.5	28160	392	99	9	9.1	2.9	2069|5365|6347|6591|7124|7422|8862|9076|9241	EREG|PLXNB3|CCL2|SNAI2|TNF|VEGFA|APLN|CLDN1|NOG	-2.2	MyList
GO Biological Processes	19	GO:0003158	endothelium development	19_GO:0032502 developmental process	-5	12	7.9	28160	141	99	6	6.1	2.4	6781|7082|7124|7422|9076|23135	STC1|TJP1|TNF|VEGFA|CLDN1|KDM6B	-2.2	MyList
GO Biological Processes	19	GO:0042362	fat-soluble vitamin biosynthetic process	19_GO:0008152 metabolic process	-4.9	66	14	28160	13	99	3	3	1.7	6591|6615|7124	SNAI2|SNAI1|TNF	-2.2	MyList
GO Biological Processes	19	GO:0048871	multicellular organismal homeostasis	19_GO:0032501 multicellular organismal process	-4.9	5.6	6.2	28160	511	99	10	10	3	4982|6513|7082|7124|7422|8862|9076|23135|25987|55818	TNFRSF11B|SLC2A1|TJP1|TNF|VEGFA|APLN|CLDN1|KDM6B|TSKU|KDM3A	-2.2	MyList
GO Biological Processes	19	GO:0007043	cell-cell junction assembly	19_GO:0009987 cellular process	-4.9	12	7.7	28160	147	99	6	6.1	2.4	1000|6591|6615|7082|7124|9076	CDH2|SNAI2|SNAI1|TJP1|TNF|CLDN1	-2.2	MyList
GO Biological Processes	19	GO:0002064	epithelial cell development	19_GO:0032502 developmental process	-4.8	8.8	7	28160	225	99	7	7.1	2.6	1000|6781|7082|7124|7422|7431|9076	CDH2|STC1|TJP1|TNF|VEGFA|VIM|CLDN1	-2.1	MyList
GO Biological Processes	19	GO:0071456	cellular response to hypoxia	19_GO:0050896 response to stimulus	-4.8	11	7.5	28160	151	99	6	6.1	2.4	205|5163|6781|7422|10397|54583	AK4|PDK1|STC1|VEGFA|NDRG1|EGLN1	-2.1	MyList
GO Biological Processes	19	GO:0034329	cell junction assembly	19_GO:0009987 cellular process	-4.7	6.1	6.2	28160	421	99	9	9.1	2.9	1000|2335|6591|6615|7082|7124|7422|9076|91156	CDH2|FN1|SNAI2|SNAI1|TJP1|TNF|VEGFA|CLDN1|IGFN1	-2.1	MyList
GO Biological Processes	19	GO:0019318	hexose metabolic process	19_GO:0008152 metabolic process	-4.7	8.4	6.8	28160	237	99	7	7.1	2.6	3099|5163|5209|5210|5507|7124|648791	HK2|PDK1|PFKFB3|PFKFB4|PPP1R3C|TNF|PPP1R3G	-2	MyList
GO Biological Processes	19	GO:0036294	cellular response to decreased oxygen levels	19_GO:0050896 response to stimulus	-4.6	11	7.3	28160	161	99	6	6.1	2.4	205|5163|6781|7422|10397|54583	AK4|PDK1|STC1|VEGFA|NDRG1|EGLN1	-2	MyList
GO Biological Processes	19	GO:0008630	intrinsic apoptotic signaling pathway in response to DNA damage	19_GO:0023052 signaling	-4.6	14	7.9	28160	99	99	5	5.1	2.2	597|6591|6615|7124|54541	BCL2A1|SNAI2|SNAI1|TNF|DDIT4	-1.9	MyList
GO Biological Processes	19	GO:0045833	negative regulation of lipid metabolic process	19_GO:0048519 negative regulation of biological process	-4.6	14	7.9	28160	100	99	5	5.1	2.2	6591|6615|7124|51141|113791	SNAI2|SNAI1|TNF|INSIG2|PIK3IP1	-1.9	MyList
GO Biological Processes	19	GO:0019218	regulation of steroid metabolic process	19_GO:0050789 regulation of biological process	-4.6	14	7.9	28160	100	99	5	5.1	2.2	133|6591|6615|7124|51141	ADM|SNAI2|SNAI1|TNF|INSIG2	-1.9	MyList
GO Biological Processes	19	GO:0050673	epithelial cell proliferation	19_GO:0009987 cellular process	-4.5	5.7	6	28160	450	99	9	9.1	2.9	2069|5365|6347|6591|7124|7422|8862|9076|9241	EREG|PLXNB3|CCL2|SNAI2|TNF|VEGFA|APLN|CLDN1|NOG	-1.9	MyList
GO Biological Processes	19	GO:0061028	establishment of endothelial barrier	19_GO:0032502 developmental process	-4.5	22	9	28160	51	99	4	4	2	7082|7124|7422|9076	TJP1|TNF|VEGFA|CLDN1	-1.9	MyList
GO Biological Processes	19	GO:0010469	regulation of signaling receptor activity	19_GO:0023052 signaling	-4.5	9.9	6.9	28160	173	99	6	6.1	2.4	2069|5328|5526|6347|7124|9241	EREG|PLAU|PPP2R5B|CCL2|TNF|NOG	-1.8	MyList
Reactome Gene Sets	6	R-HSA-449147	Signaling by Interleukins		-4.4	5.5	5.8	28160	462	99	9	9.1	2.9	1437|2335|5055|6347|7006|7124|7422|7431|58480	CSF2|FN1|SERPINB2|CCL2|TEC|TNF|VEGFA|VIM|RHOU	-1.8	MyList
GO Biological Processes	19	GO:0071453	cellular response to oxygen levels	19_GO:0050896 response to stimulus	-4.4	9.6	6.9	28160	177	99	6	6.1	2.4	205|5163|6781|7422|10397|54583	AK4|PDK1|STC1|VEGFA|NDRG1|EGLN1	-1.8	MyList
GO Biological Processes	19	GO:0003198	epithelial to mesenchymal transition involved in endocardial cushion formation	19_GO:0032502 developmental process	-4.4	45	11	28160	19	99	3	3	1.7	6591|6615|9241	SNAI2|SNAI1|NOG	-1.8	MyList
GO Biological Processes	19	GO:0009110	vitamin biosynthetic process	19_GO:0008152 metabolic process	-4.4	45	11	28160	19	99	3	3	1.7	6591|6615|7124	SNAI2|SNAI1|TNF	-1.8	MyList
Reactome Gene Sets	6	R-HSA-1280215	Cytokine Signaling in Immune system		-4.4	4.4	5.4	28160	715	99	11	11	3.2	1437|2335|3669|4982|5055|6347|7006|7124|7422|7431|58480	CSF2|FN1|ISG20|TNFRSF11B|SERPINB2|CCL2|TEC|TNF|VEGFA|VIM|RHOU	-1.8	MyList
GO Biological Processes	19	GO:0042359	vitamin D metabolic process	19_GO:0008152 metabolic process	-4.3	43	11	28160	20	99	3	3	1.7	6591|6615|7124	SNAI2|SNAI1|TNF	-1.8	MyList
WikiPathways	27	WP304	Kit receptor signaling pathway		-4.2	19	8.3	28160	60	99	4	4	2	6591|6615|7006|10603	SNAI2|SNAI1|TEC|SH2B2	-1.7	MyList
WikiPathways	27	WP272	Blood clotting cascade		-4.1	37	10	28160	23	99	3	3	1.7	2161|5055|5328	F12|SERPINB2|PLAU	-1.6	MyList
WikiPathways	27	WP3624	Lung fibrosis		-4.1	18	8.1	28160	63	99	4	4	2	1437|5328|6347|7124	CSF2|PLAU|CCL2|TNF	-1.6	MyList
GO Biological Processes	19	GO:0038034	signal transduction in absence of ligand	19_GO:0023052 signaling	-4.1	18	7.9	28160	65	99	4	4	2	597|1437|6591|7124	BCL2A1|CSF2|SNAI2|TNF	-1.6	MyList
KEGG Pathway	24	ko05230	Central carbon metabolism in cancer		-4.1	18	7.9	28160	65	99	4	4	2	3099|3939|5163|6513	HK2|LDHA|PDK1|SLC2A1	-1.6	MyList
GO Biological Processes	19	GO:0097192	extrinsic apoptotic signaling pathway in absence of ligand	19_GO:0023052 signaling	-4.1	18	7.9	28160	65	99	4	4	2	597|1437|6591|7124	BCL2A1|CSF2|SNAI2|TNF	-1.6	MyList
GO Biological Processes	19	GO:1901888	regulation of cell junction assembly	19_GO:0050789 regulation of biological process	-4.1	8.4	6.3	28160	204	99	6	6.1	2.4	6591|6615|7082|7124|7422|9076	SNAI2|SNAI1|TJP1|TNF|VEGFA|CLDN1	-1.5	MyList
GO Biological Processes	19	GO:0030855	epithelial cell differentiation	19_GO:0032502 developmental process	-4	4.4	5.2	28160	643	99	10	10	3	1000|2069|6781|7082|7124|7422|7431|9076|23135|81606	CDH2|EREG|STC1|TJP1|TNF|VEGFA|VIM|CLDN1|KDM6B|LBH	-1.5	MyList
Canonical Pathways	11	M118	PID INTEGRIN A9B1 PATHWAY		-4	34	9.8	28160	25	99	3	3	1.7	1437|2335|7422	CSF2|FN1|VEGFA	-1.5	MyList
GO Biological Processes	19	GO:0046835	carbohydrate phosphorylation	19_GO:0008152 metabolic process	-4	34	9.8	28160	25	99	3	3	1.7	3099|5209|5210	HK2|PFKFB3|PFKFB4	-1.5	MyList
GO Biological Processes	19	GO:0042730	fibrinolysis	19_GO:0048519 negative regulation of biological process	-4	34	9.8	28160	25	99	3	3	1.7	2161|5055|5328	F12|SERPINB2|PLAU	-1.5	MyList
GO Biological Processes	19	GO:0061041	regulation of wound healing	19_GO:0050896 response to stimulus	-3.9	11	6.6	28160	134	99	5	5.1	2.2	2161|5055|5328|7124|9076	F12|SERPINB2|PLAU|TNF|CLDN1	-1.5	MyList
GO Biological Processes	19	GO:0010894	negative regulation of steroid biosynthetic process	19_GO:0048519 negative regulation of biological process	-3.9	32	9.5	28160	27	99	3	3	1.7	6591|6615|51141	SNAI2|SNAI1|INSIG2	-1.5	MyList
GO Biological Processes	19	GO:0007409	axonogenesis	19_GO:0032502 developmental process	-3.9	5.4	5.4	28160	418	99	8	8.1	2.7	1000|2335|5365|5864|7422|8577|9241|25987	CDH2|FN1|PLXNB3|RAB3A|VEGFA|TMEFF1|NOG|TSKU	-1.5	MyList
Canonical Pathways	11	M145	PID P53 DOWNSTREAM PATHWAY		-3.9	10	6.5	28160	137	99	5	5.1	2.2	597|6591|9518|10397|54541	BCL2A1|SNAI2|GDF15|NDRG1|DDIT4	-1.4	MyList
WikiPathways	27	WP5092	Interactions of natural killer cells in pancreatic cancer		-3.9	30	9.3	28160	28	99	3	3	1.7	1437|6347|7124	CSF2|CCL2|TNF	-1.4	MyList
GO Biological Processes	19	GO:0044331	cell-cell adhesion mediated by cadherin	19_GO:0022610 biological adhesion	-3.9	30	9.3	28160	28	99	3	3	1.7	1000|7082|7422	CDH2|TJP1|VEGFA	-1.4	MyList
GO Biological Processes	19	GO:0048667	cell morphogenesis involved in neuron differentiation	19_GO:0032502 developmental process	-3.9	4.7	5.2	28160	544	99	9	9.1	2.9	1000|2335|5365|5864|7422|7436|8577|9241|25987	CDH2|FN1|PLXNB3|RAB3A|VEGFA|VLDLR|TMEFF1|NOG|TSKU	-1.4	MyList
GO Biological Processes	19	GO:0008202	steroid metabolic process	19_GO:0008152 metabolic process	-3.9	6.2	5.6	28160	319	99	7	7.1	2.6	133|6591|6615|7124|7436|25987|51141	ADM|SNAI2|SNAI1|TNF|VLDLR|TSKU|INSIG2	-1.4	MyList
GO Biological Processes	19	GO:2001234	negative regulation of apoptotic signaling pathway	19_GO:0048519 negative regulation of biological process	-3.8	7.6	5.9	28160	224	99	6	6.1	2.4	1437|6591|6615|7124|9241|56624	CSF2|SNAI2|SNAI1|TNF|NOG|ASAH2	-1.4	MyList
GO Biological Processes	19	GO:0048568	embryonic organ development	19_GO:0032502 developmental process	-3.8	5.3	5.3	28160	433	99	8	8.1	2.7	133|1437|6615|7124|7422|9241|26018|51141	ADM|CSF2|SNAI1|TNF|VEGFA|NOG|LRIG1|INSIG2	-1.4	MyList
GO Biological Processes	19	GO:0030335	positive regulation of cell migration	19_GO:0040011 locomotion	-3.8	4.6	5.1	28160	556	99	9	9.1	2.9	2335|5328|6591|6615|7082|7124|7422|9076|285966	FN1|PLAU|SNAI2|SNAI1|TJP1|TNF|VEGFA|CLDN1|TCAF2	-1.4	MyList
GO Biological Processes	19	GO:0045939	negative regulation of steroid metabolic process	19_GO:0048519 negative regulation of biological process	-3.8	28	8.9	28160	30	99	3	3	1.7	6591|6615|51141	SNAI2|SNAI1|INSIG2	-1.4	MyList
GO Biological Processes	19	GO:0003272	endocardial cushion formation	19_GO:0032502 developmental process	-3.8	28	8.9	28160	30	99	3	3	1.7	6591|6615|9241	SNAI2|SNAI1|NOG	-1.4	MyList
GO Biological Processes	19	GO:0061311	cell surface receptor signaling pathway involved in heart development	19_GO:0032502 developmental process	-3.8	28	8.9	28160	30	99	3	3	1.7	6591|6615|9241	SNAI2|SNAI1|NOG	-1.4	MyList
GO Biological Processes	19	GO:0048732	gland development	19_GO:0032502 developmental process	-3.8	5.2	5.2	28160	440	99	8	8.1	2.7	205|3099|7124|7422|8862|9076|9241|81606	AK4|HK2|TNF|VEGFA|APLN|CLDN1|NOG|LBH	-1.4	MyList
GO Biological Processes	19	GO:0019216	regulation of lipid metabolic process	19_GO:0050789 regulation of biological process	-3.8	6.1	5.5	28160	329	99	7	7.1	2.6	133|5163|6591|6615|7124|51141|113791	ADM|PDK1|SNAI2|SNAI1|TNF|INSIG2|PIK3IP1	-1.4	MyList
GO Biological Processes	19	GO:0061045	negative regulation of wound healing	19_GO:0048519 negative regulation of biological process	-3.8	15	7.1	28160	78	99	4	4	2	2161|5055|5328|7124	F12|SERPINB2|PLAU|TNF	-1.4	MyList
KEGG Pathway	24	hsa05230	Central carbon metabolism in cancer		-3.8	15	7.1	28160	78	99	4	4	2	3099|3939|5163|6513	HK2|LDHA|PDK1|SLC2A1	-1.4	MyList
GO Biological Processes	19	GO:0000904	cell morphogenesis involved in differentiation	19_GO:0032502 developmental process	-3.8	4.1	4.9	28160	694	99	10	10	3	1000|2335|5365|5864|6781|7422|7436|8577|9241|25987	CDH2|FN1|PLXNB3|RAB3A|STC1|VEGFA|VLDLR|TMEFF1|NOG|TSKU	-1.4	MyList
KEGG Pathway	24	hsa04610	Complement and coagulation cascades		-3.8	14	7.1	28160	79	99	4	4	2	629|2161|5055|5328	CFB|F12|SERPINB2|PLAU	-1.4	MyList
KEGG Pathway	24	ko04610	Complement and coagulation cascades		-3.8	14	7.1	28160	79	99	4	4	2	629|2161|5055|5328	CFB|F12|SERPINB2|PLAU	-1.4	MyList
GO Biological Processes	19	GO:0010975	regulation of neuron projection development	19_GO:0032502 developmental process	-3.7	5.1	5.2	28160	445	99	8	8.1	2.7	1000|2335|5365|5526|7422|7431|7436|25987	CDH2|FN1|PLXNB3|PPP2R5B|VEGFA|VIM|VLDLR|TSKU	-1.4	MyList
GO Biological Processes	19	GO:0051384	response to glucocorticoid	19_GO:0050896 response to stimulus	-3.7	9.6	6.2	28160	148	99	5	5.1	2.2	133|6781|7124|9076|54541	ADM|STC1|TNF|CLDN1|DDIT4	-1.4	MyList
GO Biological Processes	19	GO:0048545	response to steroid hormone	19_GO:0050896 response to stimulus	-3.7	5.9	5.4	28160	339	99	7	7.1	2.6	133|6781|7124|9076|54541|55818|81606	ADM|STC1|TNF|CLDN1|DDIT4|KDM3A|LBH	-1.3	MyList
KEGG Pathway	24	hsa00051	Fructose and mannose metabolism		-3.7	26	8.5	28160	33	99	3	3	1.7	3099|5209|5210	HK2|PFKFB3|PFKFB4	-1.3	MyList
KEGG Pathway	24	ko00051	Fructose and mannose metabolism		-3.7	26	8.5	28160	33	99	3	3	1.7	3099|5209|5210	HK2|PFKFB3|PFKFB4	-1.3	MyList
GO Biological Processes	19	GO:1901099	negative regulation of signal transduction in absence of ligand	19_GO:0048519 negative regulation of biological process	-3.7	26	8.5	28160	33	99	3	3	1.7	1437|6591|7124	CSF2|SNAI2|TNF	-1.3	MyList
GO Biological Processes	19	GO:2001240	negative regulation of extrinsic apoptotic signaling pathway in absence of ligand	19_GO:0048519 negative regulation of biological process	-3.7	26	8.5	28160	33	99	3	3	1.7	1437|6591|7124	CSF2|SNAI2|TNF	-1.3	MyList
GO Biological Processes	19	GO:2000147	positive regulation of cell motility	19_GO:0040011 locomotion	-3.7	4.4	4.9	28160	582	99	9	9.1	2.9	2335|5328|6591|6615|7082|7124|7422|9076|285966	FN1|PLAU|SNAI2|SNAI1|TJP1|TNF|VEGFA|CLDN1|TCAF2	-1.3	MyList
GO Biological Processes	19	GO:0097190	apoptotic signaling pathway	19_GO:0023052 signaling	-3.7	4.4	4.9	28160	582	99	9	9.1	2.9	597|1437|5163|6591|6615|7124|9241|54541|56624	BCL2A1|CSF2|PDK1|SNAI2|SNAI1|TNF|NOG|DDIT4|ASAH2	-1.3	MyList
GO Biological Processes	19	GO:0008360	regulation of cell shape	19_GO:0032502 developmental process	-3.7	9.2	6.1	28160	154	99	5	5.1	2.2	2335|5365|6347|7422|58480	FN1|PLXNB3|CCL2|VEGFA|RHOU	-1.3	MyList
GO Biological Processes	19	GO:0071407	cellular response to organic cyclic compound	19_GO:0050896 response to stimulus	-3.7	4.4	4.9	28160	585	99	9	9.1	2.9	5032|6347|6591|6781|7124|51141|54541|55818|81606	P2RY11|CCL2|SNAI2|STC1|TNF|INSIG2|DDIT4|KDM3A|LBH	-1.3	MyList
GO Biological Processes	19	GO:0045765	regulation of angiogenesis	19_GO:0032502 developmental process	-3.6	5.8	5.3	28160	346	99	7	7.1	2.6	133|3099|7082|7124|7422|51129|54583	ADM|HK2|TJP1|TNF|VEGFA|ANGPTL4|EGLN1	-1.3	MyList
Canonical Pathways	11	M44	PID HIF2PATHWAY		-3.6	25	8.4	28160	34	99	3	3	1.7	6513|7422|54583	SLC2A1|VEGFA|EGLN1	-1.3	MyList
GO Biological Processes	19	GO:0061564	axon development	19_GO:0032502 developmental process	-3.6	4.9	5	28160	467	99	8	8.1	2.7	1000|2335|5365|5864|7422|8577|9241|25987	CDH2|FN1|PLXNB3|RAB3A|VEGFA|TMEFF1|NOG|TSKU	-1.3	MyList
GO Biological Processes	19	GO:1901342	regulation of vasculature development	19_GO:0032502 developmental process	-3.6	5.7	5.2	28160	352	99	7	7.1	2.6	133|3099|7082|7124|7422|51129|54583	ADM|HK2|TJP1|TNF|VEGFA|ANGPTL4|EGLN1	-1.3	MyList
GO Biological Processes	19	GO:0051272	positive regulation of cellular component movement	19_GO:0048518 positive regulation of biological process	-3.6	4.3	4.8	28160	594	99	9	9.1	2.9	2335|5328|6591|6615|7082|7124|7422|9076|285966	FN1|PLAU|SNAI2|SNAI1|TJP1|TNF|VEGFA|CLDN1|TCAF2	-1.3	MyList
GO Biological Processes	19	GO:0007507	heart development	19_GO:0032502 developmental process	-3.6	4.3	4.8	28160	595	99	9	9.1	2.9	133|2335|2997|6591|6615|7422|8862|9241|23135	ADM|FN1|GYS1|SNAI2|SNAI1|VEGFA|APLN|NOG|KDM6B	-1.3	MyList
GO Biological Processes	19	GO:0034331	cell junction maintenance	19_GO:0009987 cellular process	-3.6	24	8.2	28160	35	99	3	3	1.7	5864|7082|9076	RAB3A|TJP1|CLDN1	-1.3	MyList
GO Biological Processes	19	GO:0035633	maintenance of blood-brain barrier	19_GO:0032501 multicellular organismal process	-3.6	24	8.2	28160	35	99	3	3	1.7	7082|7422|9076	TJP1|VEGFA|CLDN1	-1.3	MyList
GO Biological Processes	19	GO:0040017	positive regulation of locomotion	19_GO:0040011 locomotion	-3.6	4.3	4.8	28160	596	99	9	9.1	2.9	2335|5328|6591|6615|7082|7124|7422|9076|285966	FN1|PLAU|SNAI2|SNAI1|TJP1|TNF|VEGFA|CLDN1|TCAF2	-1.3	MyList
GO Biological Processes	19	GO:0060317	cardiac epithelial to mesenchymal transition	19_GO:0032502 developmental process	-3.6	24	8.1	28160	36	99	3	3	1.7	6591|6615|9241	SNAI2|SNAI1|NOG	-1.3	MyList
WikiPathways	27	WP4241	Type 2 papillary renal cell carcinoma		-3.6	24	8.1	28160	36	99	3	3	1.7	6513|7422|54583	SLC2A1|VEGFA|EGLN1	-1.3	MyList
GO Biological Processes	19	GO:0046031	ADP metabolic process	19_GO:0008152 metabolic process	-3.5	13	6.6	28160	90	99	4	4	2	205|3099|3939|54541	AK4|HK2|LDHA|DDIT4	-1.2	MyList
KEGG Pathway	24	ko05323	Rheumatoid arthritis		-3.5	13	6.6	28160	90	99	4	4	2	1437|6347|7124|7422	CSF2|CCL2|TNF|VEGFA	-1.2	MyList
GO Biological Processes	19	GO:0090596	sensory organ morphogenesis	19_GO:0032502 developmental process	-3.5	6.6	5.4	28160	257	99	6	6.1	2.4	7422|9241|25987|26018|51141|91156	VEGFA|NOG|TSKU|LRIG1|INSIG2|IGFN1	-1.2	MyList
GO Biological Processes	19	GO:1903034	regulation of response to wounding	19_GO:0050896 response to stimulus	-3.5	8.5	5.8	28160	167	99	5	5.1	2.2	2161|5055|5328|7124|9076	F12|SERPINB2|PLAU|TNF|CLDN1	-1.2	MyList
GO Biological Processes	19	GO:0031960	response to corticosteroid	19_GO:0050896 response to stimulus	-3.5	8.5	5.8	28160	167	99	5	5.1	2.2	133|6781|7124|9076|54541	ADM|STC1|TNF|CLDN1|DDIT4	-1.2	MyList
GO Biological Processes	19	GO:0048812	neuron projection morphogenesis	19_GO:0032502 developmental process	-3.5	4.2	4.7	28160	614	99	9	9.1	2.9	1000|2335|5365|5864|7422|7436|8577|9241|25987	CDH2|FN1|PLXNB3|RAB3A|VEGFA|VLDLR|TMEFF1|NOG|TSKU	-1.2	MyList
GO Biological Processes	19	GO:0021543	pallium development	19_GO:0032502 developmental process	-3.5	8.4	5.7	28160	170	99	5	5.1	2.2	597|1000|6513|23135|25987	BCL2A1|CDH2|SLC2A1|KDM6B|TSKU	-1.2	MyList
GO Biological Processes	19	GO:1903035	negative regulation of response to wounding	19_GO:0048519 negative regulation of biological process	-3.5	12	6.4	28160	94	99	4	4	2	2161|5055|5328|7124	F12|SERPINB2|PLAU|TNF	-1.2	MyList
GO Biological Processes	19	GO:0050730	regulation of peptidyl-tyrosine phosphorylation	19_GO:0050789 regulation of biological process	-3.5	6.5	5.3	28160	264	99	6	6.1	2.4	1437|2069|5526|7006|7124|7422	CSF2|EREG|PPP2R5B|TEC|TNF|VEGFA	-1.2	MyList
GO Biological Processes	19	GO:0003203	endocardial cushion morphogenesis	19_GO:0032502 developmental process	-3.5	22	7.8	28160	39	99	3	3	1.7	6591|6615|9241	SNAI2|SNAI1|NOG	-1.2	MyList
GO Biological Processes	19	GO:0046890	regulation of lipid biosynthetic process	19_GO:0050789 regulation of biological process	-3.5	8.3	5.7	28160	171	99	5	5.1	2.2	133|6591|6615|7124|51141	ADM|SNAI2|SNAI1|TNF|INSIG2	-1.2	MyList
GO Biological Processes	19	GO:0048589	developmental growth	19_GO:0040007 growth	-3.4	4.1	4.6	28160	627	99	9	9.1	2.9	133|2069|2335|6781|7006|7422|9241|9518|25987	ADM|EREG|FN1|STC1|TEC|VEGFA|NOG|GDF15|TSKU	-1.2	MyList
WikiPathways	27	WP500	Glycogen synthesis and degradation		-3.4	21	7.6	28160	40	99	3	3	1.7	2997|3099|5526	GYS1|HK2|PPP2R5B	-1.2	MyList
GO Biological Processes	19	GO:0007169	transmembrane receptor protein tyrosine kinase signaling pathway	19_GO:0023052 signaling	-3.4	4.1	4.6	28160	629	99	9	9.1	2.9	2069|5526|7422|8862|9241|9518|10603|54541|79930	EREG|PPP2R5B|VEGFA|APLN|NOG|GDF15|SH2B2|DDIT4|DOK3	-1.2	MyList
GO Biological Processes	19	GO:0120039	plasma membrane bounded cell projection morphogenesis	19_GO:0032502 developmental process	-3.4	4.1	4.6	28160	629	99	9	9.1	2.9	1000|2335|5365|5864|7422|7436|8577|9241|25987	CDH2|FN1|PLXNB3|RAB3A|VEGFA|VLDLR|TMEFF1|NOG|TSKU	-1.2	MyList
GO Biological Processes	19	GO:0001659	temperature homeostasis	19_GO:0032501 multicellular organismal process	-3.4	8.2	5.6	28160	174	99	5	5.1	2.2	7124|7422|8862|23135|55818	TNF|VEGFA|APLN|KDM6B|KDM3A	-1.2	MyList
GO Biological Processes	19	GO:0006694	steroid biosynthetic process	19_GO:0008152 metabolic process	-3.4	8.2	5.6	28160	174	99	5	5.1	2.2	133|6591|6615|7124|51141	ADM|SNAI2|SNAI1|TNF|INSIG2	-1.2	MyList
GO Biological Processes	19	GO:0051346	negative regulation of hydrolase activity	19_GO:0065007 biological regulation	-3.4	5.3	5	28160	379	99	7	7.1	2.6	5055|5365|5918|7124|7422|51129|54583	SERPINB2|PLXNB3|RARRES1|TNF|VEGFA|ANGPTL4|EGLN1	-1.2	MyList
KEGG Pathway	24	hsa04151	PI3K-Akt signaling pathway		-3.4	5.2	4.9	28160	380	99	7	7.1	2.6	2069|2256|2335|2997|5526|7422|54541	EREG|FGF11|FN1|GYS1|PPP2R5B|VEGFA|DDIT4	-1.2	MyList
GO Biological Processes	19	GO:0048858	cell projection morphogenesis	19_GO:0032502 developmental process	-3.4	4	4.6	28160	633	99	9	9.1	2.9	1000|2335|5365|5864|7422|7436|8577|9241|25987	CDH2|FN1|PLXNB3|RAB3A|VEGFA|VLDLR|TMEFF1|NOG|TSKU	-1.2	MyList
GO Biological Processes	19	GO:0061061	muscle structure development	19_GO:0032502 developmental process	-3.4	4	4.6	28160	636	99	9	9.1	2.9	133|1000|2069|7124|7422|9241|9518|23135|79365	ADM|CDH2|EREG|TNF|VEGFA|NOG|GDF15|KDM6B|BHLHE41	-1.2	MyList
KEGG Pathway	24	hsa05323	Rheumatoid arthritis		-3.4	11	6.2	28160	99	99	4	4	2	1437|6347|7124|7422	CSF2|CCL2|TNF|VEGFA	-1.2	MyList
KEGG Pathway	24	ko04933	AGE-RAGE signaling pathway in diabetic complications		-3.4	11	6.2	28160	99	99	4	4	2	2335|6347|7124|7422	FN1|CCL2|TNF|VEGFA	-1.2	MyList
GO Biological Processes	19	GO:0006165	nucleoside diphosphate phosphorylation	19_GO:0008152 metabolic process	-3.4	11	6.2	28160	99	99	4	4	2	205|3099|3939|54541	AK4|HK2|LDHA|DDIT4	-1.2	MyList
GO Biological Processes	19	GO:0042692	muscle cell differentiation	19_GO:0032502 developmental process	-3.4	5.2	4.9	28160	384	99	7	7.1	2.6	133|1000|2069|7422|9518|23135|79365	ADM|CDH2|EREG|VEGFA|GDF15|KDM6B|BHLHE41	-1.2	MyList
Canonical Pathways	11	M174	PID UPA UPAR PATHWAY		-3.4	20	7.4	28160	42	99	3	3	1.7	2335|5328|7436	FN1|PLAU|VLDLR	-1.1	MyList
GO Biological Processes	19	GO:0046939	nucleotide phosphorylation	19_GO:0008152 metabolic process	-3.3	11	6.1	28160	101	99	4	4	2	205|3099|3939|54541	AK4|HK2|LDHA|DDIT4	-1.1	MyList
GO Biological Processes	19	GO:0045766	positive regulation of angiogenesis	19_GO:0048518 positive regulation of biological process	-3.3	7.9	5.5	28160	181	99	5	5.1	2.2	133|3099|7082|7422|51129	ADM|HK2|TJP1|VEGFA|ANGPTL4	-1.1	MyList
GO Biological Processes	19	GO:1904018	positive regulation of vasculature development	19_GO:0048518 positive regulation of biological process	-3.3	7.9	5.5	28160	181	99	5	5.1	2.2	133|3099|7082|7422|51129	ADM|HK2|TJP1|VEGFA|ANGPTL4	-1.1	MyList
WikiPathways	27	WP4754	IL-18 signaling pathway		-3.3	6.1	5.1	28160	279	99	6	6.1	2.4	2335|4982|6347|7124|7422|9076	FN1|TNFRSF11B|CCL2|TNF|VEGFA|CLDN1	-1.1	MyList
GO Biological Processes	19	GO:0062014	negative regulation of small molecule metabolic process	19_GO:0048519 negative regulation of biological process	-3.3	11	6.1	28160	102	99	4	4	2	6591|6615|51141|54541	SNAI2|SNAI1|INSIG2|DDIT4	-1.1	MyList
GO Biological Processes	19	GO:2001239	regulation of extrinsic apoptotic signaling pathway in absence of ligand	19_GO:0023052 signaling	-3.3	20	7.3	28160	43	99	3	3	1.7	1437|6591|7124	CSF2|SNAI2|TNF	-1.1	MyList
Canonical Pathways	11	M53	PID INTEGRIN3 PATHWAY		-3.3	20	7.3	28160	43	99	3	3	1.7	2335|5328|7422	FN1|PLAU|VEGFA	-1.1	MyList
GO Biological Processes	19	GO:0006775	fat-soluble vitamin metabolic process	19_GO:0008152 metabolic process	-3.3	20	7.3	28160	43	99	3	3	1.7	6591|6615|7124	SNAI2|SNAI1|TNF	-1.1	MyList
GO Biological Processes	19	GO:0032990	cell part morphogenesis	19_GO:0032502 developmental process	-3.3	3.9	4.5	28160	651	99	9	9.1	2.9	1000|2335|5365|5864|7422|7436|8577|9241|25987	CDH2|FN1|PLXNB3|RAB3A|VEGFA|VLDLR|TMEFF1|NOG|TSKU	-1.1	MyList
GO Biological Processes	19	GO:0009135	purine nucleoside diphosphate metabolic process	19_GO:0008152 metabolic process	-3.3	11	6.1	28160	103	99	4	4	2	205|3099|3939|54541	AK4|HK2|LDHA|DDIT4	-1.1	MyList
GO Biological Processes	19	GO:0009179	purine ribonucleoside diphosphate metabolic process	19_GO:0008152 metabolic process	-3.3	11	6.1	28160	103	99	4	4	2	205|3099|3939|54541	AK4|HK2|LDHA|DDIT4	-1.1	MyList
GO Biological Processes	19	GO:0005978	glycogen biosynthetic process	19_GO:0008152 metabolic process	-3.3	19	7.3	28160	44	99	3	3	1.7	2997|5507|648791	GYS1|PPP1R3C|PPP1R3G	-1.1	MyList
GO Biological Processes	19	GO:0009250	glucan biosynthetic process	19_GO:0008152 metabolic process	-3.3	19	7.3	28160	44	99	3	3	1.7	2997|5507|648791	GYS1|PPP1R3C|PPP1R3G	-1.1	MyList
GO Biological Processes	19	GO:0001936	regulation of endothelial cell proliferation	19_GO:0050789 regulation of biological process	-3.3	7.7	5.4	28160	185	99	5	5.1	2.2	5365|6347|7124|7422|8862	PLXNB3|CCL2|TNF|VEGFA|APLN	-1.1	MyList
GO Biological Processes	19	GO:0007369	gastrulation	19_GO:0032502 developmental process	-3.3	7.6	5.4	28160	186	99	5	5.1	2.2	2335|6615|8862|9241|23135	FN1|SNAI1|APLN|NOG|KDM6B	-1.1	MyList
WikiPathways	27	WP534	Glycolysis and gluconeogenesis		-3.3	19	7.2	28160	45	99	3	3	1.7	3099|3939|6513	HK2|LDHA|SLC2A1	-1.1	MyList
GO Biological Processes	19	GO:0006766	vitamin metabolic process	19_GO:0008152 metabolic process	-3.3	11	6	28160	106	99	4	4	2	6513|6591|6615|7124	SLC2A1|SNAI2|SNAI1|TNF	-1.1	MyList
GO Biological Processes	19	GO:0006090	pyruvate metabolic process	19_GO:0008152 metabolic process	-3.3	11	6	28160	106	99	4	4	2	3099|3939|5163|54541	HK2|LDHA|PDK1|DDIT4	-1.1	MyList
GO Biological Processes	19	GO:0009185	ribonucleoside diphosphate metabolic process	19_GO:0008152 metabolic process	-3.3	11	6	28160	106	99	4	4	2	205|3099|3939|54541	AK4|HK2|LDHA|DDIT4	-1.1	MyList
GO Biological Processes	19	GO:0097193	intrinsic apoptotic signaling pathway	19_GO:0023052 signaling	-3.3	5.9	5	28160	288	99	6	6.1	2.4	597|5163|6591|6615|7124|54541	BCL2A1|PDK1|SNAI2|SNAI1|TNF|DDIT4	-1.1	MyList
KEGG Pathway	24	hsa04933	AGE-RAGE signaling pathway in diabetic complications		-3.3	11	5.9	28160	107	99	4	4	2	2335|6347|7124|7422	FN1|CCL2|TNF|VEGFA	-1.1	MyList
GO Biological Processes	19	GO:0042303	molting cycle	19_GO:0032501 multicellular organismal process	-3.3	11	5.9	28160	107	99	4	4	2	6615|7124|25987|26018	SNAI1|TNF|TSKU|LRIG1	-1.1	MyList
GO Biological Processes	19	GO:0042633	hair cycle	19_GO:0032501 multicellular organismal process	-3.3	11	5.9	28160	107	99	4	4	2	6615|7124|25987|26018	SNAI1|TNF|TSKU|LRIG1	-1.1	MyList
GO Biological Processes	19	GO:0051216	cartilage development	19_GO:0032502 developmental process	-3.2	7.4	5.3	28160	191	99	5	5.1	2.2	6591|6615|6781|9241|25987	SNAI2|SNAI1|STC1|NOG|TSKU	-1.1	MyList
GO Biological Processes	19	GO:1901615	organic hydroxy compound metabolic process	19_GO:0008152 metabolic process	-3.2	4.3	4.5	28160	533	99	8	8.1	2.7	3939|6591|6615|7124|7436|25987|51141|56624	LDHA|SNAI2|SNAI1|TNF|VLDLR|TSKU|INSIG2|ASAH2	-1.1	MyList
GO Biological Processes	19	GO:0050731	positive regulation of peptidyl-tyrosine phosphorylation	19_GO:0048518 positive regulation of biological process	-3.2	7.4	5.3	28160	193	99	5	5.1	2.2	1437|2069|7006|7124|7422	CSF2|EREG|TEC|TNF|VEGFA	-1.1	MyList
Reactome Gene Sets	6	R-HSA-6783783	Interleukin-10 signaling		-3.2	18	7	28160	47	99	3	3	1.7	1437|6347|7124	CSF2|CCL2|TNF	-1.1	MyList
GO Biological Processes	19	GO:0043114	regulation of vascular permeability	19_GO:0032501 multicellular organismal process	-3.2	18	7	28160	47	99	3	3	1.7	133|7082|7422	ADM|TJP1|VEGFA	-1.1	MyList
GO Biological Processes	19	GO:0003197	endocardial cushion development	19_GO:0032502 developmental process	-3.2	18	7	28160	47	99	3	3	1.7	6591|6615|9241	SNAI2|SNAI1|NOG	-1.1	MyList
GO Biological Processes	19	GO:0007595	lactation	19_GO:0051179 localization	-3.2	18	7	28160	47	99	3	3	1.7	3099|7422|8862	HK2|VEGFA|APLN	-1.1	MyList
Reactome Gene Sets	6	R-HSA-71387	Metabolism of carbohydrates		-3.2	5.8	4.9	28160	295	99	6	6.1	2.4	2997|3099|5209|5210|5507|6513	GYS1|HK2|PFKFB3|PFKFB4|PPP1R3C|SLC2A1	-1.1	MyList
GO Biological Processes	19	GO:0006006	glucose metabolic process	19_GO:0008152 metabolic process	-3.2	7.3	5.2	28160	196	99	5	5.1	2.2	3099|5163|5507|7124|648791	HK2|PDK1|PPP1R3C|TNF|PPP1R3G	-1.1	MyList
GO Biological Processes	19	GO:0045596	negative regulation of cell differentiation	19_GO:0048519 negative regulation of biological process	-3.2	3.7	4.3	28160	683	99	9	9.1	2.9	2069|6591|6615|7124|7422|9241|25987|79365|81606	EREG|SNAI2|SNAI1|TNF|VEGFA|NOG|TSKU|BHLHE41|LBH	-1	MyList
KEGG Pathway	24	hsa04931	insulin resistance		-3.2	10	5.7	28160	113	99	4	4	2	2997|5507|6513|7124	GYS1|PPP1R3C|SLC2A1|TNF	-1	MyList
GO Biological Processes	19	GO:0030195	negative regulation of blood coagulation	19_GO:0048519 negative regulation of biological process	-3.2	17	6.8	28160	49	99	3	3	1.7	2161|5055|5328	F12|SERPINB2|PLAU	-1	MyList
GO Biological Processes	19	GO:0042063	gliogenesis	19_GO:0032502 developmental process	-3.2	5.7	4.8	28160	301	99	6	6.1	2.4	1000|6347|7124|7431|9241|10397	CDH2|CCL2|TNF|VIM|NOG|NDRG1	-1	MyList
WikiPathways	27	WP4659	Gastrin signaling pathway		-3.1	10	5.7	28160	114	99	4	4	2	5055|7082|7422|9076	SERPINB2|TJP1|VEGFA|CLDN1	-1	MyList
GO Biological Processes	19	GO:0001935	endothelial cell proliferation	19_GO:0009987 cellular process	-3.1	7.1	5.2	28160	200	99	5	5.1	2.2	5365|6347|7124|7422|8862	PLXNB3|CCL2|TNF|VEGFA|APLN	-1	MyList
GO Biological Processes	19	GO:0071363	cellular response to growth factor stimulus	19_GO:0050896 response to stimulus	-3.1	3.7	4.3	28160	689	99	9	9.1	2.9	5526|6347|6591|7422|8862|9076|9241|9518|54541	PPP2R5B|CCL2|SNAI2|VEGFA|APLN|CLDN1|NOG|GDF15|DDIT4	-1	MyList
GO Biological Processes	19	GO:0060688	regulation of morphogenesis of a branching structure	19_GO:0032502 developmental process	-3.1	17	6.8	28160	50	99	3	3	1.7	7124|7422|9241	TNF|VEGFA|NOG	-1	MyList
GO Biological Processes	19	GO:1900047	negative regulation of hemostasis	19_GO:0048519 negative regulation of biological process	-3.1	17	6.8	28160	50	99	3	3	1.7	2161|5055|5328	F12|SERPINB2|PLAU	-1	MyList
GO Biological Processes	19	GO:0044283	small molecule biosynthetic process	19_GO:0008152 metabolic process	-3.1	4.1	4.4	28160	554	99	8	8.1	2.7	133|5352|6591|6615|7124|51141|55818|56624	ADM|PLOD2|SNAI2|SNAI1|TNF|INSIG2|KDM3A|ASAH2	-1	MyList
GO Biological Processes	19	GO:0048608	reproductive structure development	19_GO:0022414 reproductive process	-3.1	4.7	4.5	28160	426	99	7	7.1	2.6	133|1437|2069|6615|6781|7422|9241	ADM|CSF2|EREG|SNAI1|STC1|VEGFA|NOG	-1	MyList
GO Biological Processes	19	GO:0050808	synapse organization	19_GO:0009987 cellular process	-3.1	4.7	4.5	28160	426	99	7	7.1	2.6	1000|5864|7124|8497|9758|10397|91156	CDH2|RAB3A|TNF|PPFIA4|FRMPD4|NDRG1|IGFN1	-1	MyList
GO Biological Processes	19	GO:0061458	reproductive system development	19_GO:0032502 developmental process	-3.1	4.6	4.5	28160	429	99	7	7.1	2.6	133|1437|2069|6615|6781|7422|9241	ADM|CSF2|EREG|SNAI1|STC1|VEGFA|NOG	-1	MyList
Canonical Pathways	11	M231	PID KIT PATHWAY		-3.1	16	6.6	28160	52	99	3	3	1.7	6591|7006|10603	SNAI2|TEC|SH2B2	-1	MyList
GO Biological Processes	19	GO:0048863	stem cell differentiation	19_GO:0032502 developmental process	-3.1	6.9	5	28160	207	99	5	5.1	2.2	1000|2335|6591|55818|81606	CDH2|FN1|SNAI2|KDM3A|LBH	-0.99	MyList
KEGG Pathway	24	ko04152	AMPK signaling pathway		-3.1	9.5	5.5	28160	120	99	4	4	2	2997|5209|5210|5526	GYS1|PFKFB3|PFKFB4|PPP2R5B	-0.98	MyList
GO Biological Processes	19	GO:0050819	negative regulation of coagulation	19_GO:0048519 negative regulation of biological process	-3.1	16	6.5	28160	53	99	3	3	1.7	2161|5055|5328	F12|SERPINB2|PLAU	-0.98	MyList
GO Biological Processes	19	GO:0050679	positive regulation of epithelial cell proliferation	19_GO:0048518 positive regulation of biological process	-3.1	6.8	5	28160	209	99	5	5.1	2.2	5365|7422|8862|9076|9241	PLXNB3|VEGFA|APLN|CLDN1|NOG	-0.98	MyList
GO Biological Processes	19	GO:0001704	formation of primary germ layer	19_GO:0032502 developmental process	-3.1	9.4	5.5	28160	121	99	4	4	2	2335|6615|9241|23135	FN1|SNAI1|NOG|KDM6B	-0.97	MyList
GO Biological Processes	19	GO:0019058	viral life cycle	19_GO:0016032 viral process	-3	5.4	4.7	28160	318	99	6	6.1	2.4	3669|6347|7124|9076|10318|155382	ISG20|CCL2|TNF|CLDN1|TNIP1|VPS37D	-0.96	MyList
GO Biological Processes	19	GO:0010035	response to inorganic substance	19_GO:0050896 response to stimulus	-3	4	4.3	28160	574	99	8	8.1	2.7	1437|3939|4982|8989|9076|10397|23135|54583	CSF2|LDHA|TNFRSF11B|TRPA1|CLDN1|NDRG1|KDM6B|EGLN1	-0.95	MyList
GO Biological Processes	19	GO:0072132	mesenchyme morphogenesis	19_GO:0032502 developmental process	-3	16	6.4	28160	55	99	3	3	1.7	6591|6615|9241	SNAI2|SNAI1|NOG	-0.94	MyList
GO Biological Processes	19	GO:0009132	nucleoside diphosphate metabolic process	19_GO:0008152 metabolic process	-3	9.2	5.4	28160	124	99	4	4	2	205|3099|3939|54541	AK4|HK2|LDHA|DDIT4	-0.94	MyList
WikiPathways	27	WP2882	Nuclear receptors meta-pathway		-3	5.3	4.6	28160	322	99	6	6.1	2.4	5055|6347|6513|6591|7124|51129	SERPINB2|CCL2|SLC2A1|SNAI2|TNF|ANGPTL4	-0.94	MyList
GO Biological Processes	19	GO:0070848	response to growth factor	19_GO:0050896 response to stimulus	-3	3.6	4.1	28160	720	99	9	9.1	2.9	5526|6347|6591|7422|8862|9076|9241|9518|54541	PPP2R5B|CCL2|SNAI2|VEGFA|APLN|CLDN1|NOG|GDF15|DDIT4	-0.94	MyList
GO Biological Processes	19	GO:2000027	regulation of animal organ morphogenesis	19_GO:0032502 developmental process	-3	9.1	5.4	28160	125	99	4	4	2	4982|7124|7422|9241	TNFRSF11B|TNF|VEGFA|NOG	-0.94	MyList
GO Biological Processes	19	GO:0045071	negative regulation of viral genome replication	19_GO:0016032 viral process	-3	15	6.3	28160	56	99	3	3	1.7	3669|7124|10318	ISG20|TNF|TNIP1	-0.93	MyList
GO Biological Processes	19	GO:0007596	blood coagulation	19_GO:0032501 multicellular organismal process	-3	6.5	4.9	28160	218	99	5	5.1	2.2	2161|2335|5055|5328|7006	F12|FN1|SERPINB2|PLAU|TEC	-0.92	MyList
GO Biological Processes	19	GO:0007498	mesoderm development	19_GO:0032502 developmental process	-2.9	8.8	5.3	28160	129	99	4	4	2	6615|7422|9241|23135	SNAI1|VEGFA|NOG|KDM6B	-0.89	MyList
KEGG Pathway	24	hsa04152	AMPK signaling pathway		-2.9	8.8	5.3	28160	129	99	4	4	2	2997|5209|5210|5526	GYS1|PFKFB3|PFKFB4|PPP2R5B	-0.89	MyList
GO Biological Processes	19	GO:0043467	regulation of generation of precursor metabolites and energy	19_GO:0050789 regulation of biological process	-2.9	8.8	5.3	28160	130	99	4	4	2	205|5507|54541|648791	AK4|PPP1R3C|DDIT4|PPP1R3G	-0.89	MyList
GO Biological Processes	19	GO:0007599	hemostasis	19_GO:0065007 biological regulation	-2.9	6.4	4.8	28160	223	99	5	5.1	2.2	2161|2335|5055|5328|7006	F12|FN1|SERPINB2|PLAU|TEC	-0.89	MyList
GO Biological Processes	19	GO:0050817	coagulation	19_GO:0032501 multicellular organismal process	-2.9	6.4	4.8	28160	223	99	5	5.1	2.2	2161|2335|5055|5328|7006	F12|FN1|SERPINB2|PLAU|TEC	-0.89	MyList
WikiPathways	27	WP558	Complement and coagulation cascades		-2.9	14	6.1	28160	59	99	3	3	1.7	629|2161|5328	CFB|F12|PLAU	-0.88	MyList
GO Biological Processes	19	GO:0051055	negative regulation of lipid biosynthetic process	19_GO:0048519 negative regulation of biological process	-2.9	14	6.1	28160	59	99	3	3	1.7	6591|6615|51141	SNAI2|SNAI1|INSIG2	-0.88	MyList
GO Biological Processes	19	GO:0019827	stem cell population maintenance	19_GO:0032502 developmental process	-2.9	8.7	5.2	28160	131	99	4	4	2	1000|9241|55818|81606	CDH2|NOG|KDM3A|LBH	-0.88	MyList
GO Biological Processes	19	GO:0019079	viral genome replication	19_GO:0016032 viral process	-2.9	8.7	5.2	28160	131	99	4	4	2	3669|6347|7124|10318	ISG20|CCL2|TNF|TNIP1	-0.88	MyList
GO Biological Processes	19	GO:0048598	embryonic morphogenesis	19_GO:0032502 developmental process	-2.9	3.8	4.1	28160	595	99	8	8.1	2.7	133|2335|6615|8862|9241|23135|26018|51141	ADM|FN1|SNAI1|APLN|NOG|KDM6B|LRIG1|INSIG2	-0.88	MyList
GO Biological Processes	19	GO:0010001	glial cell differentiation	19_GO:0032502 developmental process	-2.9	6.3	4.8	28160	225	99	5	5.1	2.2	1000|7124|7431|9241|10397	CDH2|TNF|VIM|NOG|NDRG1	-0.88	MyList
GO Biological Processes	19	GO:0032989	cellular component morphogenesis	19_GO:0032502 developmental process	-2.9	3.4	4	28160	743	99	9	9.1	2.9	1000|2335|5365|5864|7422|7436|8577|9241|25987	CDH2|FN1|PLXNB3|RAB3A|VEGFA|VLDLR|TMEFF1|NOG|TSKU	-0.88	MyList
GO Biological Processes	19	GO:0098727	maintenance of cell number	19_GO:0032502 developmental process	-2.9	8.5	5.2	28160	134	99	4	4	2	1000|9241|55818|81606	CDH2|NOG|KDM3A|LBH	-0.86	MyList
GO Biological Processes	19	GO:0032496	response to lipopolysaccharide	19_GO:0044419 biological process involved in interspecies interaction between organisms	-2.9	5	4.4	28160	342	99	6	6.1	2.4	133|1437|6347|7124|7431|9076	ADM|CSF2|CCL2|TNF|VIM|CLDN1	-0.85	MyList
KEGG Pathway	24	ko04151	PI3K-Akt signaling pathway		-2.9	5	4.4	28160	342	99	6	6.1	2.4	2256|2335|2997|5526|7422|54541	FGF11|FN1|GYS1|PPP2R5B|VEGFA|DDIT4	-0.85	MyList
GO Biological Processes	19	GO:0007420	brain development	19_GO:0032502 developmental process	-2.9	3.4	4	28160	753	99	9	9.1	2.9	205|597|1000|5209|6513|9241|23135|25987|54541	AK4|BCL2A1|CDH2|PFKFB3|SLC2A1|NOG|KDM6B|TSKU|DDIT4	-0.84	MyList
GO Biological Processes	19	GO:2000351	regulation of endothelial cell apoptotic process	19_GO:0050789 regulation of biological process	-2.9	14	6	28160	62	99	3	3	1.7	6347|7124|51129	CCL2|TNF|ANGPTL4	-0.84	MyList
WikiPathways	27	WP3863	T-cell antigen receptor (TCR) pathway during Staphylococcus aureus infection		-2.9	14	6	28160	62	99	3	3	1.7	1437|5163|7124	CSF2|PDK1|TNF	-0.84	MyList
WikiPathways	27	WP4172	PI3K-Akt signaling pathway		-2.9	4.9	4.4	28160	345	99	6	6.1	2.4	2256|2335|2997|5526|7422|54541	FGF11|FN1|GYS1|PPP2R5B|VEGFA|DDIT4	-0.84	MyList
GO Biological Processes	19	GO:0031667	response to nutrient levels	19_GO:0050896 response to stimulus	-2.9	4.2	4.2	28160	472	99	7	7.1	2.6	133|3939|4982|6513|6591|6781|9518	ADM|LDHA|TNFRSF11B|SLC2A1|SNAI2|STC1|GDF15	-0.84	MyList
KEGG Pathway	24	hsa04910	Insulin signaling pathway		-2.8	8.2	5.1	28160	138	99	4	4	2	2997|3099|5507|10603	GYS1|HK2|PPP1R3C|SH2B2	-0.83	MyList
KEGG Pathway	24	ko04910	Insulin signaling pathway		-2.8	8.2	5.1	28160	138	99	4	4	2	2997|3099|5507|10603	GYS1|HK2|PPP1R3C|SH2B2	-0.83	MyList
GO Biological Processes	19	GO:1901617	organic hydroxy compound biosynthetic process	19_GO:0008152 metabolic process	-2.8	6	4.6	28160	237	99	5	5.1	2.2	6591|6615|7124|51141|56624	SNAI2|SNAI1|TNF|INSIG2|ASAH2	-0.81	MyList
GO Biological Processes	19	GO:0030879	mammary gland development	19_GO:0032502 developmental process	-2.8	8.1	5	28160	140	99	4	4	2	3099|7422|8862|81606	HK2|VEGFA|APLN|LBH	-0.81	MyList
GO Biological Processes	19	GO:0048729	tissue morphogenesis	19_GO:0032502 developmental process	-2.8	3.7	4	28160	618	99	8	8.1	2.7	133|6591|6615|6781|7124|7422|9241|23135	ADM|SNAI2|SNAI1|STC1|TNF|VEGFA|NOG|KDM6B	-0.81	MyList
GO Biological Processes	19	GO:0048762	mesenchymal cell differentiation	19_GO:0032502 developmental process	-2.8	6	4.6	28160	238	99	5	5.1	2.2	1000|2335|6591|6615|9241	CDH2|FN1|SNAI2|SNAI1|NOG	-0.81	MyList
Canonical Pathways	11	M3468	NABA ECM REGULATORS		-2.8	6	4.6	28160	238	99	5	5.1	2.2	2161|5055|5328|5352|54583	F12|SERPINB2|PLAU|PLOD2|EGLN1	-0.81	MyList
KEGG Pathway	24	hsa05211	Renal cell carcinoma		-2.8	13	5.8	28160	65	99	3	3	1.7	6513|7422|54583	SLC2A1|VEGFA|EGLN1	-0.81	MyList
KEGG Pathway	24	ko05211	Renal cell carcinoma		-2.8	13	5.8	28160	65	99	3	3	1.7	6513|7422|54583	SLC2A1|VEGFA|EGLN1	-0.81	MyList
GO Biological Processes	19	GO:1905330	regulation of morphogenesis of an epithelium	19_GO:0032502 developmental process	-2.8	13	5.8	28160	65	99	3	3	1.7	7124|7422|9241	TNF|VEGFA|NOG	-0.81	MyList
GO Biological Processes	19	GO:2001233	regulation of apoptotic signaling pathway	19_GO:0023052 signaling	-2.8	4.8	4.3	28160	356	99	6	6.1	2.4	1437|6591|6615|7124|9241|56624	CSF2|SNAI2|SNAI1|TNF|NOG|ASAH2	-0.8	MyList
GO Biological Processes	19	GO:0033692	cellular polysaccharide biosynthetic process	19_GO:0008152 metabolic process	-2.8	13	5.8	28160	66	99	3	3	1.7	2997|5507|648791	GYS1|PPP1R3C|PPP1R3G	-0.8	MyList
GO Biological Processes	19	GO:0030193	regulation of blood coagulation	19_GO:0032501 multicellular organismal process	-2.8	13	5.8	28160	66	99	3	3	1.7	2161|5055|5328	F12|SERPINB2|PLAU	-0.8	MyList
Canonical Pathways	11	M18	PID INTEGRIN1 PATHWAY		-2.8	13	5.8	28160	66	99	3	3	1.7	2335|5328|7422	FN1|PLAU|VEGFA	-0.8	MyList
WikiPathways	27	WP2858	Ectoderm differentiation		-2.8	7.9	4.9	28160	144	99	4	4	2	4982|6347|6781|25987	TNFRSF11B|CCL2|STC1|TSKU	-0.78	MyList
GO Biological Processes	19	GO:0008285	negative regulation of cell population proliferation	19_GO:0048519 negative regulation of biological process	-2.8	3.3	3.8	28160	779	99	9	9.1	2.9	133|2069|5918|6347|6591|7124|8862|9241|10397	ADM|EREG|RARRES1|CCL2|SNAI2|TNF|APLN|NOG|NDRG1	-0.78	MyList
GO Biological Processes	19	GO:0043954	cellular component maintenance	19_GO:0009987 cellular process	-2.8	13	5.7	28160	67	99	3	3	1.7	5864|7082|9076	RAB3A|TJP1|CLDN1	-0.78	MyList
GO Biological Processes	19	GO:0072577	endothelial cell apoptotic process	19_GO:0009987 cellular process	-2.8	13	5.7	28160	67	99	3	3	1.7	6347|7124|51129	CCL2|TNF|ANGPTL4	-0.78	MyList
GO Biological Processes	19	GO:0001890	placenta development	19_GO:0022414 reproductive process	-2.8	7.8	4.9	28160	145	99	4	4	2	133|1437|6615|6781	ADM|CSF2|SNAI1|STC1	-0.78	MyList
GO Biological Processes	19	GO:0006091	generation of precursor metabolites and energy	19_GO:0008152 metabolic process	-2.8	4.1	4.1	28160	490	99	7	7.1	2.6	205|2997|3099|3939|5507|54541|648791	AK4|GYS1|HK2|LDHA|PPP1R3C|DDIT4|PPP1R3G	-0.78	MyList
GO Biological Processes	19	GO:0002237	response to molecule of bacterial origin	19_GO:0044419 biological process involved in interspecies interaction between organisms	-2.7	4.7	4.2	28160	362	99	6	6.1	2.4	133|1437|6347|7124|7431|9076	ADM|CSF2|CCL2|TNF|VIM|CLDN1	-0.78	MyList
GO Biological Processes	19	GO:0010675	regulation of cellular carbohydrate metabolic process	19_GO:0050789 regulation of biological process	-2.7	7.8	4.9	28160	146	99	4	4	2	5163|5507|54541|648791	PDK1|PPP1R3C|DDIT4|PPP1R3G	-0.78	MyList
WikiPathways	27	WP5039	SARS-CoV-2 innate immunity evasion and cell-specific immune response		-2.7	13	5.7	28160	68	99	3	3	1.7	1437|6347|7124	CSF2|CCL2|TNF	-0.78	MyList
GO Biological Processes	19	GO:1900046	regulation of hemostasis	19_GO:0050789 regulation of biological process	-2.7	13	5.7	28160	68	99	3	3	1.7	2161|5055|5328	F12|SERPINB2|PLAU	-0.78	MyList
GO Biological Processes	19	GO:0050767	regulation of neurogenesis	19_GO:0032502 developmental process	-2.7	4.7	4.2	28160	364	99	6	6.1	2.4	2335|5365|7124|7422|9241|79365	FN1|PLXNB3|TNF|VEGFA|NOG|BHLHE41	-0.77	MyList
GO Biological Processes	19	GO:0042531	positive regulation of tyrosine phosphorylation of STAT protein	19_GO:0048518 positive regulation of biological process	-2.7	12	5.6	28160	69	99	3	3	1.7	1437|7124|7422	CSF2|TNF|VEGFA	-0.76	MyList
GO Biological Processes	19	GO:0051966	regulation of synaptic transmission, glutamatergic	19_GO:0023052 signaling	-2.7	12	5.6	28160	69	99	3	3	1.7	1000|6347|7124	CDH2|CCL2|TNF	-0.76	MyList
Canonical Pathways	11	M167	PID AP1 PATHWAY		-2.7	12	5.6	28160	70	99	3	3	1.7	1437|5328|6347	CSF2|PLAU|CCL2	-0.75	MyList
GO Biological Processes	19	GO:0021537	telencephalon development	19_GO:0032502 developmental process	-2.7	5.7	4.4	28160	251	99	5	5.1	2.2	597|1000|6513|23135|25987	BCL2A1|CDH2|SLC2A1|KDM6B|TSKU	-0.75	MyList
GO Biological Processes	19	GO:0060322	head development	19_GO:0032502 developmental process	-2.7	3.2	3.8	28160	796	99	9	9.1	2.9	205|597|1000|5209|6513|9241|23135|25987|54541	AK4|BCL2A1|CDH2|PFKFB3|SLC2A1|NOG|KDM6B|TSKU|DDIT4	-0.74	MyList
GO Biological Processes	19	GO:0009991	response to extracellular stimulus	19_GO:0050896 response to stimulus	-2.7	4	4	28160	503	99	7	7.1	2.6	133|3939|4982|6513|6591|6781|9518	ADM|LDHA|TNFRSF11B|SLC2A1|SNAI2|STC1|GDF15	-0.74	MyList
WikiPathways	27	WP2880	Glucocorticoid receptor pathway		-2.7	12	5.5	28160	71	99	3	3	1.7	6347|6591|51129	CCL2|SNAI2|ANGPTL4	-0.74	MyList
GO Biological Processes	19	GO:0050818	regulation of coagulation	19_GO:0032501 multicellular organismal process	-2.7	12	5.5	28160	71	99	3	3	1.7	2161|5055|5328	F12|SERPINB2|PLAU	-0.74	MyList
Reactome Gene Sets	6	R-HSA-70171	Glycolysis		-2.7	12	5.5	28160	71	99	3	3	1.7	3099|5209|5210	HK2|PFKFB3|PFKFB4	-0.74	MyList
GO Biological Processes	19	GO:0061448	connective tissue development	19_GO:0032502 developmental process	-2.7	5.6	4.4	28160	255	99	5	5.1	2.2	6591|6615|6781|9241|25987	SNAI2|SNAI1|STC1|NOG|TSKU	-0.73	MyList
KEGG Pathway	24	hsa04520	Adherens junction		-2.7	12	5.5	28160	72	99	3	3	1.7	6591|6615|7082	SNAI2|SNAI1|TJP1	-0.73	MyList
GO Biological Processes	19	GO:0001707	mesoderm formation	19_GO:0032502 developmental process	-2.7	12	5.5	28160	72	99	3	3	1.7	6615|9241|23135	SNAI1|NOG|KDM6B	-0.73	MyList
GO Biological Processes	19	GO:0005977	glycogen metabolic process	19_GO:0008152 metabolic process	-2.7	12	5.5	28160	72	99	3	3	1.7	2997|5507|648791	GYS1|PPP1R3C|PPP1R3G	-0.73	MyList
KEGG Pathway	24	ko04520	Adherens junction		-2.7	12	5.5	28160	72	99	3	3	1.7	6591|6615|7082	SNAI2|SNAI1|TJP1	-0.73	MyList
GO Biological Processes	19	GO:0001501	skeletal system development	19_GO:0032502 developmental process	-2.7	3.9	3.9	28160	508	99	7	7.1	2.6	4982|6591|6615|6781|9241|25987|51141	TNFRSF11B|SNAI2|SNAI1|STC1|NOG|TSKU|INSIG2	-0.73	MyList
GO Biological Processes	19	GO:1901652	response to peptide	19_GO:0050896 response to stimulus	-2.7	3.9	3.9	28160	508	99	7	7.1	2.6	133|2069|6513|7431|9518|10603|51141	ADM|EREG|SLC2A1|VIM|GDF15|SH2B2|INSIG2	-0.73	MyList
GO Biological Processes	19	GO:0018108	peptidyl-tyrosine phosphorylation	19_GO:0008152 metabolic process	-2.7	4.5	4.1	28160	376	99	6	6.1	2.4	1437|2069|5526|7006|7124|7422	CSF2|EREG|PPP2R5B|TEC|TNF|VEGFA	-0.73	MyList
GO Biological Processes	19	GO:0050770	regulation of axonogenesis	19_GO:0032502 developmental process	-2.7	7.4	4.7	28160	154	99	4	4	2	1000|2335|5365|7422	CDH2|FN1|PLXNB3|VEGFA	-0.73	MyList
GO Biological Processes	19	GO:0000271	polysaccharide biosynthetic process	19_GO:0008152 metabolic process	-2.7	12	5.4	28160	73	99	3	3	1.7	2997|5507|648791	GYS1|PPP1R3C|PPP1R3G	-0.73	MyList
GO Biological Processes	19	GO:0006073	cellular glucan metabolic process	19_GO:0008152 metabolic process	-2.7	12	5.4	28160	73	99	3	3	1.7	2997|5507|648791	GYS1|PPP1R3C|PPP1R3G	-0.73	MyList
GO Biological Processes	19	GO:0051145	smooth muscle cell differentiation	19_GO:0032502 developmental process	-2.7	12	5.4	28160	73	99	3	3	1.7	133|2069|7422	ADM|EREG|VEGFA	-0.73	MyList
GO Biological Processes	19	GO:0044042	glucan metabolic process	19_GO:0008152 metabolic process	-2.7	12	5.4	28160	73	99	3	3	1.7	2997|5507|648791	GYS1|PPP1R3C|PPP1R3G	-0.73	MyList
GO Biological Processes	19	GO:0030330	DNA damage response, signal transduction by p53 class mediator	19_GO:0023052 signaling	-2.7	12	5.4	28160	73	99	3	3	1.7	6591|6615|10397	SNAI2|SNAI1|NDRG1	-0.73	MyList
GO Biological Processes	19	GO:0120035	regulation of plasma membrane bounded cell projection organization	19_GO:0050789 regulation of biological process	-2.7	3.5	3.8	28160	655	99	8	8.1	2.7	1000|2335|5365|5526|7422|7431|7436|25987	CDH2|FN1|PLXNB3|PPP2R5B|VEGFA|VIM|VLDLR|TSKU	-0.73	MyList
GO Biological Processes	19	GO:0018212	peptidyl-tyrosine modification	19_GO:0008152 metabolic process	-2.7	4.5	4.1	28160	379	99	6	6.1	2.4	1437|2069|5526|7006|7124|7422	CSF2|EREG|PPP2R5B|TEC|TNF|VEGFA	-0.72	MyList
WikiPathways	27	WP2572	Primary focal segmental glomerulosclerosis (FSGS)		-2.6	12	5.4	28160	74	99	3	3	1.7	1000|7431|9076	CDH2|VIM|CLDN1	-0.72	MyList
GO Biological Processes	19	GO:0048332	mesoderm morphogenesis	19_GO:0032502 developmental process	-2.6	12	5.4	28160	74	99	3	3	1.7	6615|9241|23135	SNAI1|NOG|KDM6B	-0.72	MyList
GO Biological Processes	19	GO:0046323	glucose import	19_GO:0051179 localization	-2.6	12	5.4	28160	74	99	3	3	1.7	3099|6513|7124	HK2|SLC2A1|TNF	-0.72	MyList
GO Biological Processes	19	GO:0030900	forebrain development	19_GO:0032502 developmental process	-2.6	4.5	4.1	28160	381	99	6	6.1	2.4	597|1000|6513|9241|23135|25987	BCL2A1|CDH2|SLC2A1|NOG|KDM6B|TSKU	-0.72	MyList
GO Biological Processes	19	GO:0003018	vascular process in circulatory system	19_GO:0032501 multicellular organismal process	-2.6	5.4	4.3	28160	263	99	5	5.1	2.2	133|6513|7082|7422|8862	ADM|SLC2A1|TJP1|VEGFA|APLN	-0.7	MyList
GO Biological Processes	19	GO:0031344	regulation of cell projection organization	19_GO:0050789 regulation of biological process	-2.6	3.4	3.7	28160	673	99	8	8.1	2.7	1000|2335|5365|5526|7422|7431|7436|25987	CDH2|FN1|PLXNB3|PPP2R5B|VEGFA|VIM|VLDLR|TSKU	-0.67	MyList
GO Biological Processes	19	GO:0001894	tissue homeostasis	19_GO:0032501 multicellular organismal process	-2.6	5.3	4.2	28160	268	99	5	5.1	2.2	4982|6513|7082|7422|9076	TNFRSF11B|SLC2A1|TJP1|VEGFA|CLDN1	-0.67	MyList
GO Biological Processes	19	GO:0043408	regulation of MAPK cascade	19_GO:0023052 signaling	-2.6	3.4	3.7	28160	674	99	8	8.1	2.7	1000|2335|6347|7124|7422|9518|10318|81606	CDH2|FN1|CCL2|TNF|VEGFA|GDF15|TNIP1|LBH	-0.67	MyList
KEGG Pathway	24	ko04060	Cytokine-cytokine receptor interaction		-2.6	5.3	4.2	28160	270	99	5	5.1	2.2	1437|4982|6347|7124|7422	CSF2|TNFRSF11B|CCL2|TNF|VEGFA	-0.66	MyList
KEGG Pathway	24	hsa04060	Cytokine-cytokine receptor interaction		-2.6	5.3	4.2	28160	270	99	5	5.1	2.2	1437|4982|6347|7124|7422	CSF2|TNFRSF11B|CCL2|TNF|VEGFA	-0.66	MyList
GO Biological Processes	19	GO:0050772	positive regulation of axonogenesis	19_GO:0048518 positive regulation of biological process	-2.6	11	5.2	28160	79	99	3	3	1.7	2335|5365|7422	FN1|PLXNB3|VEGFA	-0.65	MyList
GO Biological Processes	19	GO:0034637	cellular carbohydrate biosynthetic process	19_GO:0008152 metabolic process	-2.6	11	5.2	28160	79	99	3	3	1.7	2997|5507|648791	GYS1|PPP1R3C|PPP1R3G	-0.65	MyList
Canonical Pathways	11	M66	PID MYC ACTIV PATHWAY		-2.6	11	5.2	28160	79	99	3	3	1.7	3939|6513|6615	LDHA|SLC2A1|SNAI1	-0.65	MyList
GO Biological Processes	19	GO:0072331	signal transduction by p53 class mediator	19_GO:0023052 signaling	-2.6	6.9	4.5	28160	165	99	4	4	2	6591|6615|10397|54541	SNAI2|SNAI1|NDRG1|DDIT4	-0.65	MyList
GO Biological Processes	19	GO:0050680	negative regulation of epithelial cell proliferation	19_GO:0048519 negative regulation of biological process	-2.6	6.9	4.5	28160	165	99	4	4	2	2069|6347|6591|7124	EREG|CCL2|SNAI2|TNF	-0.65	MyList
GO Biological Processes	19	GO:0006096	glycolytic process	19_GO:0008152 metabolic process	-2.5	11	5.1	28160	81	99	3	3	1.7	3099|3939|54541	HK2|LDHA|DDIT4	-0.63	MyList
GO Biological Processes	19	GO:0048708	astrocyte differentiation	19_GO:0032502 developmental process	-2.5	11	5.1	28160	81	99	3	3	1.7	7124|7431|9241	TNF|VIM|NOG	-0.63	MyList
GO Biological Processes	19	GO:0007259	receptor signaling pathway via JAK-STAT	19_GO:0023052 signaling	-2.5	6.7	4.4	28160	169	99	4	4	2	1437|6347|7124|7422	CSF2|CCL2|TNF|VEGFA	-0.62	MyList
GO Biological Processes	19	GO:0006757	ATP generation from ADP	19_GO:0008152 metabolic process	-2.5	10	5.1	28160	82	99	3	3	1.7	3099|3939|54541	HK2|LDHA|DDIT4	-0.62	MyList
GO Biological Processes	19	GO:0014032	neural crest cell development	19_GO:0032502 developmental process	-2.5	10	5.1	28160	82	99	3	3	1.7	1000|2335|6591	CDH2|FN1|SNAI2	-0.62	MyList
GO Biological Processes	19	GO:0030178	negative regulation of Wnt signaling pathway	19_GO:0048519 negative regulation of biological process	-2.5	6.7	4.4	28160	171	99	4	4	2	1000|6591|9241|25987	CDH2|SNAI2|NOG|TSKU	-0.61	MyList
GO Biological Processes	19	GO:0001892	embryonic placenta development	19_GO:0022414 reproductive process	-2.5	10	5	28160	83	99	3	3	1.7	133|1437|6615	ADM|CSF2|SNAI1	-0.61	MyList
GO Biological Processes	19	GO:0007584	response to nutrient	19_GO:0050896 response to stimulus	-2.5	6.6	4.4	28160	172	99	4	4	2	3939|4982|6591|6781	LDHA|TNFRSF11B|SNAI2|STC1	-0.6	MyList
GO Biological Processes	19	GO:0022404	molting cycle process	19_GO:0032501 multicellular organismal process	-2.5	10	5	28160	84	99	3	3	1.7	6615|7124|26018	SNAI1|TNF|LRIG1	-0.6	MyList
GO Biological Processes	19	GO:0022405	hair cycle process	19_GO:0032501 multicellular organismal process	-2.5	10	5	28160	84	99	3	3	1.7	6615|7124|26018	SNAI1|TNF|LRIG1	-0.6	MyList
GO Biological Processes	19	GO:0006112	energy reserve metabolic process	19_GO:0008152 metabolic process	-2.5	10	5	28160	84	99	3	3	1.7	2997|5507|648791	GYS1|PPP1R3C|PPP1R3G	-0.6	MyList
GO Biological Processes	19	GO:1900542	regulation of purine nucleotide metabolic process	19_GO:0050789 regulation of biological process	-2.5	10	5	28160	84	99	3	3	1.7	205|5163|54541	AK4|PDK1|DDIT4	-0.6	MyList
GO Biological Processes	19	GO:0006970	response to osmotic stress	19_GO:0050896 response to stimulus	-2.5	10	5	28160	85	99	3	3	1.7	6513|7124|9076	SLC2A1|TNF|CLDN1	-0.59	MyList
GO Biological Processes	19	GO:0045069	regulation of viral genome replication	19_GO:0016032 viral process	-2.5	10	5	28160	85	99	3	3	1.7	3669|7124|10318	ISG20|TNF|TNIP1	-0.59	MyList
GO Biological Processes	19	GO:0051146	striated muscle cell differentiation	19_GO:0032502 developmental process	-2.5	5	4	28160	285	99	5	5.1	2.2	1000|7422|9518|23135|79365	CDH2|VEGFA|GDF15|KDM6B|BHLHE41	-0.59	MyList
GO Biological Processes	19	GO:0050954	sensory perception of mechanical stimulus	19_GO:0032501 multicellular organismal process	-2.5	6.5	4.3	28160	175	99	4	4	2	5864|6591|8989|26018	RAB3A|SNAI2|TRPA1|LRIG1	-0.59	MyList
GO Biological Processes	19	GO:1905475	regulation of protein localization to membrane	19_GO:0051179 localization	-2.5	6.5	4.3	28160	175	99	4	4	2	1000|7124|27237|285966	CDH2|TNF|ARHGEF16|TCAF2	-0.59	MyList
GO Biological Processes	19	GO:0007423	sensory organ development	19_GO:0032502 developmental process	-2.5	3.6	3.7	28160	555	99	7	7.1	2.6	7422|7431|9241|25987|26018|51141|91156	VEGFA|VIM|NOG|TSKU|LRIG1|INSIG2|IGFN1	-0.58	MyList
GO Biological Processes	19	GO:0042509	regulation of tyrosine phosphorylation of STAT protein	19_GO:0023052 signaling	-2.5	9.9	4.9	28160	86	99	3	3	1.7	1437|7124|7422	CSF2|TNF|VEGFA	-0.58	MyList
GO Biological Processes	19	GO:0006140	regulation of nucleotide metabolic process	19_GO:0050789 regulation of biological process	-2.5	9.9	4.9	28160	86	99	3	3	1.7	205|5163|54541	AK4|PDK1|DDIT4	-0.58	MyList
GO Biological Processes	19	GO:0043434	response to peptide hormone	19_GO:0050896 response to stimulus	-2.5	4.1	3.8	28160	416	99	6	6.1	2.4	133|2069|6513|9518|10603|51141	ADM|EREG|SLC2A1|GDF15|SH2B2|INSIG2	-0.58	MyList
GO Biological Processes	19	GO:0016032	viral process	19_GO:0016032 viral process	-2.5	4.1	3.8	28160	416	99	6	6.1	2.4	3669|6347|7124|9076|10318|155382	ISG20|CCL2|TNF|CLDN1|TNIP1|VPS37D	-0.58	MyList
GO Biological Processes	19	GO:0030324	lung development	19_GO:0032502 developmental process	-2.4	6.4	4.3	28160	177	99	4	4	2	5864|7124|7422|9241	RAB3A|TNF|VEGFA|NOG	-0.58	MyList
GO Biological Processes	19	GO:0048864	stem cell development	19_GO:0032502 developmental process	-2.4	9.8	4.9	28160	87	99	3	3	1.7	1000|2335|6591	CDH2|FN1|SNAI2	-0.58	MyList
GO Biological Processes	19	GO:0014031	mesenchymal cell development	19_GO:0032502 developmental process	-2.4	9.8	4.9	28160	87	99	3	3	1.7	1000|2335|6591	CDH2|FN1|SNAI2	-0.58	MyList
GO Biological Processes	19	GO:0006109	regulation of carbohydrate metabolic process	19_GO:0050789 regulation of biological process	-2.4	6.4	4.3	28160	178	99	4	4	2	5163|5507|54541|648791	PDK1|PPP1R3C|DDIT4|PPP1R3G	-0.57	MyList
GO Biological Processes	19	GO:0060485	mesenchyme development	19_GO:0032502 developmental process	-2.4	4.9	3.9	28160	292	99	5	5.1	2.2	1000|2335|6591|6615|9241	CDH2|FN1|SNAI2|SNAI1|NOG	-0.56	MyList
GO Biological Processes	19	GO:0097696	receptor signaling pathway via STAT	19_GO:0023052 signaling	-2.4	6.3	4.3	28160	180	99	4	4	2	1437|6347|7124|7422	CSF2|CCL2|TNF|VEGFA	-0.56	MyList
WikiPathways	27	WP2328	Allograft Rejection		-2.4	9.6	4.8	28160	89	99	3	3	1.7	7124|7422|7431	TNF|VEGFA|VIM	-0.56	MyList
GO Biological Processes	19	GO:0007260	tyrosine phosphorylation of STAT protein	19_GO:0023052 signaling	-2.4	9.6	4.8	28160	89	99	3	3	1.7	1437|7124|7422	CSF2|TNF|VEGFA	-0.56	MyList
GO Biological Processes	19	GO:0051781	positive regulation of cell division	19_GO:0048518 positive regulation of biological process	-2.4	9.6	4.8	28160	89	99	3	3	1.7	2069|7422|81606	EREG|VEGFA|LBH	-0.56	MyList
GO Biological Processes	19	GO:0030323	respiratory tube development	19_GO:0032502 developmental process	-2.4	6.3	4.2	28160	181	99	4	4	2	5864|7124|7422|9241	RAB3A|TNF|VEGFA|NOG	-0.55	MyList
GO Biological Processes	19	GO:0061138	morphogenesis of a branching epithelium	19_GO:0032502 developmental process	-2.4	6.2	4.2	28160	183	99	4	4	2	133|7124|7422|9241	ADM|TNF|VEGFA|NOG	-0.54	MyList
Reactome Gene Sets	6	R-HSA-70326	Glucose metabolism		-2.4	9.4	4.8	28160	91	99	3	3	1.7	3099|5209|5210	HK2|PFKFB3|PFKFB4	-0.53	MyList
GO Biological Processes	19	GO:0035249	synaptic transmission, glutamatergic	19_GO:0023052 signaling	-2.4	9.3	4.7	28160	92	99	3	3	1.7	1000|6347|7124	CDH2|CCL2|TNF	-0.52	MyList
GO Biological Processes	19	GO:0014033	neural crest cell differentiation	19_GO:0032502 developmental process	-2.4	9.3	4.7	28160	92	99	3	3	1.7	1000|2335|6591	CDH2|FN1|SNAI2	-0.52	MyList
GO Biological Processes	19	GO:0048525	negative regulation of viral process	19_GO:0016032 viral process	-2.4	9.3	4.7	28160	92	99	3	3	1.7	3669|7124|10318	ISG20|TNF|TNIP1	-0.52	MyList
KEGG Pathway	24	ko04657	IL-17 signaling pathway		-2.4	9.2	4.7	28160	93	99	3	3	1.7	1437|6347|7124	CSF2|CCL2|TNF	-0.51	MyList
GO Biological Processes	19	GO:1990830	cellular response to leukemia inhibitory factor	19_GO:0050896 response to stimulus	-2.3	9.1	4.7	28160	94	99	3	3	1.7	3099|5277|55818	HK2|PIGA|KDM3A	-0.5	MyList
GO Biological Processes	19	GO:0060349	bone morphogenesis	19_GO:0032502 developmental process	-2.3	9.1	4.7	28160	94	99	3	3	1.7	6781|25987|51141	STC1|TSKU|INSIG2	-0.5	MyList
WikiPathways	27	WP3888	VEGFA-VEGFR2 signaling pathway		-2.3	3.9	3.6	28160	439	99	6	6.1	2.4	2335|3939|5328|6347|7422|10397	FN1|LDHA|PLAU|CCL2|VEGFA|NDRG1	-0.5	MyList
GO Biological Processes	19	GO:0007589	body fluid secretion	19_GO:0051179 localization	-2.3	9	4.6	28160	95	99	3	3	1.7	3099|7422|8862	HK2|VEGFA|APLN	-0.5	MyList
KEGG Pathway	24	ko04064	NF-kappa B signaling pathway		-2.3	9	4.6	28160	95	99	3	3	1.7	597|5328|7124	BCL2A1|PLAU|TNF	-0.5	MyList
KEGG Pathway	24	hsa04657	IL-17 signaling pathway		-2.3	9	4.6	28160	95	99	3	3	1.7	1437|6347|7124	CSF2|CCL2|TNF	-0.5	MyList
GO Biological Processes	19	GO:1990823	response to leukemia inhibitory factor	19_GO:0050896 response to stimulus	-2.3	9	4.6	28160	95	99	3	3	1.7	3099|5277|55818	HK2|PIGA|KDM3A	-0.5	MyList
KEGG Pathway	24	ko05146	Amoebiasis		-2.3	8.9	4.6	28160	96	99	3	3	1.7	1437|2335|7124	CSF2|FN1|TNF	-0.49	MyList
GO Biological Processes	19	GO:0022604	regulation of cell morphogenesis	19_GO:0032502 developmental process	-2.3	4.6	3.8	28160	309	99	5	5.1	2.2	2335|5365|6347|7422|58480	FN1|PLXNB3|CCL2|VEGFA|RHOU	-0.49	MyList
GO Biological Processes	19	GO:0032870	cellular response to hormone stimulus	19_GO:0050896 response to stimulus	-2.3	3.4	3.5	28160	588	99	7	7.1	2.6	6781|9518|10603|51141|54541|55818|81606	STC1|GDF15|SH2B2|INSIG2|DDIT4|KDM3A|LBH	-0.49	MyList
GO Biological Processes	19	GO:0051960	regulation of nervous system development	19_GO:0032502 developmental process	-2.3	3.9	3.6	28160	443	99	6	6.1	2.4	2335|5365|7124|7422|9241|79365	FN1|PLXNB3|TNF|VEGFA|NOG|BHLHE41	-0.48	MyList
GO Biological Processes	19	GO:0007565	female pregnancy	19_GO:0051704 multi-organism process	-2.3	5.9	4.1	28160	193	99	4	4	2	133|6513|6781|7422	ADM|SLC2A1|STC1|VEGFA	-0.48	MyList
GO Biological Processes	19	GO:2001237	negative regulation of extrinsic apoptotic signaling pathway	19_GO:0048519 negative regulation of biological process	-2.3	8.8	4.6	28160	97	99	3	3	1.7	1437|6591|7124	CSF2|SNAI2|TNF	-0.48	MyList
GO Biological Processes	19	GO:0120162	positive regulation of cold-induced thermogenesis	19_GO:0048518 positive regulation of biological process	-2.3	8.8	4.6	28160	97	99	3	3	1.7	7422|23135|55818	VEGFA|KDM6B|KDM3A	-0.48	MyList
GO Biological Processes	19	GO:0044264	cellular polysaccharide metabolic process	19_GO:0008152 metabolic process	-2.3	8.8	4.6	28160	97	99	3	3	1.7	2997|5507|648791	GYS1|PPP1R3C|PPP1R3G	-0.48	MyList
GO Biological Processes	19	GO:0051345	positive regulation of hydrolase activity	19_GO:0065007 biological regulation	-2.3	3.4	3.4	28160	593	99	7	7.1	2.6	2335|6347|7124|7422|23526|27237|80758	FN1|CCL2|TNF|VEGFA|ARHGAP45|ARHGEF16|PRR7	-0.47	MyList
GO Biological Processes	19	GO:0030155	regulation of cell adhesion	19_GO:0022610 biological adhesion	-2.3	3	3.3	28160	751	99	8	8.1	2.7	2335|5328|5365|6347|6591|7082|7124|7422	FN1|PLAU|PLXNB3|CCL2|SNAI2|TJP1|TNF|VEGFA	-0.47	MyList
GO Biological Processes	19	GO:0030162	regulation of proteolysis	19_GO:0050789 regulation of biological process	-2.3	3	3.3	28160	752	99	8	8.1	2.7	2161|2335|5055|5918|7124|7422|10318|80758	F12|FN1|SERPINB2|RARRES1|TNF|VEGFA|TNIP1|PRR7	-0.47	MyList
GO Biological Processes	19	GO:0060249	anatomical structure homeostasis	19_GO:0065007 biological regulation	-2.3	4.5	3.7	28160	314	99	5	5.1	2.2	4982|6513|7082|7422|9076	TNFRSF11B|SLC2A1|TJP1|VEGFA|CLDN1	-0.47	MyList
WikiPathways	27	WP2806	Complement system		-2.3	8.6	4.5	28160	99	99	3	3	1.7	133|629|2161	ADM|CFB|F12	-0.46	MyList
GO Biological Processes	19	GO:0001763	morphogenesis of a branching structure	19_GO:0032502 developmental process	-2.3	5.8	4	28160	197	99	4	4	2	133|7124|7422|9241	ADM|TNF|VEGFA|NOG	-0.46	MyList
GO Biological Processes	19	GO:1904035	regulation of epithelial cell apoptotic process	19_GO:0050789 regulation of biological process	-2.3	8.5	4.5	28160	100	99	3	3	1.7	6347|7124|51129	CCL2|TNF|ANGPTL4	-0.45	MyList
WikiPathways	27	WP2064	Neural crest differentiation		-2.2	8.4	4.4	28160	102	99	3	3	1.7	1000|6591|6615	CDH2|SNAI2|SNAI1	-0.43	MyList
GO Biological Processes	19	GO:0006935	chemotaxis	19_GO:0040011 locomotion	-2.2	3.3	3.4	28160	607	99	7	7.1	2.6	5328|5365|6347|7422|8577|9241|27237	PLAU|PLXNB3|CCL2|VEGFA|TMEFF1|NOG|ARHGEF16	-0.43	MyList
KEGG Pathway	24	hsa04660	T cell receptor signaling pathway		-2.2	8.3	4.4	28160	103	99	3	3	1.7	1437|7006|7124	CSF2|TEC|TNF	-0.42	MyList
KEGG Pathway	24	ko04660	T cell receptor signaling pathway		-2.2	8.3	4.4	28160	103	99	3	3	1.7	1437|7006|7124	CSF2|TEC|TNF	-0.42	MyList
KEGG Pathway	24	ko04922	Glucagon signaling pathway		-2.2	8.3	4.4	28160	103	99	3	3	1.7	2997|3939|6513	GYS1|LDHA|SLC2A1	-0.42	MyList
GO Biological Processes	19	GO:0042330	taxis	19_GO:0040011 locomotion	-2.2	3.3	3.4	28160	610	99	7	7.1	2.6	5328|5365|6347|7422|8577|9241|27237	PLAU|PLXNB3|CCL2|VEGFA|TMEFF1|NOG|ARHGEF16	-0.42	MyList
KEGG Pathway	24	ko05205	Proteoglycans in cancer		-2.2	5.6	3.9	28160	203	99	4	4	2	2335|5328|7124|7422	FN1|PLAU|TNF|VEGFA	-0.42	MyList
GO Biological Processes	19	GO:0071383	cellular response to steroid hormone stimulus	19_GO:0050896 response to stimulus	-2.2	5.6	3.9	28160	204	99	4	4	2	6781|54541|55818|81606	STC1|DDIT4|KDM3A|LBH	-0.42	MyList
GO Biological Processes	19	GO:0060541	respiratory system development	19_GO:0032502 developmental process	-2.2	5.6	3.9	28160	204	99	4	4	2	5864|7124|7422|9241	RAB3A|TNF|VEGFA|NOG	-0.42	MyList
GO Biological Processes	19	GO:0052547	regulation of peptidase activity	19_GO:0050789 regulation of biological process	-2.2	3.7	3.5	28160	464	99	6	6.1	2.4	2335|5055|5918|7124|7422|80758	FN1|SERPINB2|RARRES1|TNF|VEGFA|PRR7	-0.41	MyList
GO Biological Processes	19	GO:0000165	MAPK cascade	19_GO:0023052 signaling	-2.2	2.9	3.2	28160	775	99	8	8.1	2.7	1000|2335|6347|7124|7422|9518|10318|81606	CDH2|FN1|CCL2|TNF|VEGFA|GDF15|TNIP1|LBH	-0.41	MyList
GO Biological Processes	19	GO:0010942	positive regulation of cell death	19_GO:0048518 positive regulation of biological process	-2.2	3.2	3.3	28160	618	99	7	7.1	2.6	133|3939|6347|7124|54541|79845|80758	ADM|LDHA|CCL2|TNF|DDIT4|RNF122|PRR7	-0.4	MyList
GO Biological Processes	19	GO:1905477	positive regulation of protein localization to membrane	19_GO:0048518 positive regulation of biological process	-2.2	8.1	4.3	28160	106	99	3	3	1.7	7124|27237|285966	TNF|ARHGEF16|TCAF2	-0.4	MyList
GO Biological Processes	19	GO:0071222	cellular response to lipopolysaccharide	19_GO:0044419 biological process involved in interspecies interaction between organisms	-2.2	5.5	3.8	28160	208	99	4	4	2	1437|6347|7124|7431	CSF2|CCL2|TNF|VIM	-0.4	MyList
Reactome Gene Sets	6	R-HSA-109582	Hemostasis		-2.2	3.2	3.3	28160	621	99	7	7.1	2.6	2161|2335|5055|5328|5526|7422|10603	F12|FN1|SERPINB2|PLAU|PPP2R5B|VEGFA|SH2B2	-0.39	MyList
KEGG Pathway	24	hsa04064	NF-kappa B signaling pathway		-2.2	8	4.3	28160	107	99	3	3	1.7	597|5328|7124	BCL2A1|PLAU|TNF	-0.39	MyList
KEGG Pathway	24	hsa05146	Amoebiasis		-2.2	8	4.3	28160	107	99	3	3	1.7	1437|2335|7124	CSF2|FN1|TNF	-0.39	MyList
KEGG Pathway	24	hsa04922	Glucagon signaling pathway		-2.2	8	4.3	28160	107	99	3	3	1.7	2997|3939|6513	GYS1|LDHA|SLC2A1	-0.39	MyList
WikiPathways	27	WP615	Senescence and autophagy in cancer		-2.2	7.9	4.3	28160	108	99	3	3	1.7	2335|5055|5328	FN1|SERPINB2|PLAU	-0.39	MyList
KEGG Pathway	24	ko04668	TNF signaling pathway		-2.2	7.9	4.3	28160	108	99	3	3	1.7	1437|6347|7124	CSF2|CCL2|TNF	-0.39	MyList
GO Biological Processes	19	GO:0005976	polysaccharide metabolic process	19_GO:0008152 metabolic process	-2.2	7.9	4.3	28160	108	99	3	3	1.7	2997|5507|648791	GYS1|PPP1R3C|PPP1R3G	-0.39	MyList
GO Biological Processes	19	GO:0043086	negative regulation of catalytic activity	19_GO:0065007 biological regulation	-2.2	2.9	3.2	28160	789	99	8	8.1	2.7	5055|5365|5918|7124|7422|51129|54583|113791	SERPINB2|PLXNB3|RARRES1|TNF|VEGFA|ANGPTL4|EGLN1|PIK3IP1	-0.38	MyList
GO Biological Processes	19	GO:0014066	regulation of phosphatidylinositol 3-kinase signaling	19_GO:0023052 signaling	-2.2	7.8	4.2	28160	109	99	3	3	1.7	2335|7124|113791	FN1|TNF|PIK3IP1	-0.38	MyList
GO Biological Processes	19	GO:0043583	ear development	19_GO:0032502 developmental process	-2.2	5.3	3.8	28160	213	99	4	4	2	9241|25987|26018|51141	NOG|TSKU|LRIG1|INSIG2	-0.37	MyList
GO Biological Processes	19	GO:0001938	positive regulation of endothelial cell proliferation	19_GO:0048518 positive regulation of biological process	-2.1	7.7	4.2	28160	111	99	3	3	1.7	5365|7422|8862	PLXNB3|VEGFA|APLN	-0.36	MyList
GO Biological Processes	19	GO:1904659	glucose transmembrane transport	19_GO:0051179 localization	-2.1	7.7	4.2	28160	111	99	3	3	1.7	3099|6513|7124	HK2|SLC2A1|TNF	-0.36	MyList
GO Biological Processes	19	GO:0071417	cellular response to organonitrogen compound	19_GO:0050896 response to stimulus	-2.1	3.1	3.2	28160	637	99	7	7.1	2.6	5032|6781|7124|7431|9518|10603|51141	P2RY11|STC1|TNF|VIM|GDF15|SH2B2|INSIG2	-0.35	MyList
GO Biological Processes	19	GO:0002526	acute inflammatory response	19_GO:0050896 response to stimulus	-2.1	7.6	4.2	28160	112	99	3	3	1.7	2161|2335|7124	F12|FN1|TNF	-0.35	MyList
GO Biological Processes	19	GO:0044344	cellular response to fibroblast growth factor stimulus	19_GO:0050896 response to stimulus	-2.1	7.6	4.2	28160	112	99	3	3	1.7	6347|8862|9241	CCL2|APLN|NOG	-0.35	MyList
GO Biological Processes	19	GO:0030336	negative regulation of cell migration	19_GO:0040011 locomotion	-2.1	4.1	3.5	28160	343	99	5	5.1	2.2	5365|6347|6781|7124|9241	PLXNB3|CCL2|STC1|TNF|NOG	-0.35	MyList
KEGG Pathway	24	hsa05205	Proteoglycans in cancer		-2.1	5.2	3.7	28160	218	99	4	4	2	2335|5328|7124|7422	FN1|PLAU|TNF|VEGFA	-0.35	MyList
GO Biological Processes	19	GO:0097191	extrinsic apoptotic signaling pathway	19_GO:0023052 signaling	-2.1	5.2	3.7	28160	219	99	4	4	2	597|1437|6591|7124	BCL2A1|CSF2|SNAI2|TNF	-0.34	MyList
GO Biological Processes	19	GO:0008645	hexose transmembrane transport	19_GO:0051179 localization	-2.1	7.5	4.1	28160	114	99	3	3	1.7	3099|6513|7124	HK2|SLC2A1|TNF	-0.34	MyList
GO Biological Processes	19	GO:0031623	receptor internalization	19_GO:0051179 localization	-2.1	7.5	4.1	28160	114	99	3	3	1.7	133|7422|8862	ADM|VEGFA|APLN	-0.34	MyList
GO Biological Processes	19	GO:0071219	cellular response to molecule of bacterial origin	19_GO:0044419 biological process involved in interspecies interaction between organisms	-2.1	5.2	3.7	28160	220	99	4	4	2	1437|6347|7124|7431	CSF2|CCL2|TNF|VIM	-0.34	MyList
GO Biological Processes	19	GO:0044706	multi-multicellular organism process	19_GO:0051704 multi-organism process	-2.1	5.2	3.7	28160	220	99	4	4	2	133|6513|6781|7422	ADM|SLC2A1|STC1|VEGFA	-0.34	MyList
GO Biological Processes	19	GO:0048705	skeletal system morphogenesis	19_GO:0032502 developmental process	-2.1	5.1	3.7	28160	221	99	4	4	2	6781|9241|25987|51141	STC1|NOG|TSKU|INSIG2	-0.33	MyList
GO Biological Processes	19	GO:0021987	cerebral cortex development	19_GO:0032502 developmental process	-2.1	7.4	4.1	28160	115	99	3	3	1.7	597|1000|6513	BCL2A1|CDH2|SLC2A1	-0.33	MyList
GO Biological Processes	19	GO:0042471	ear morphogenesis	19_GO:0032502 developmental process	-2.1	7.4	4.1	28160	115	99	3	3	1.7	9241|26018|51141	NOG|LRIG1|INSIG2	-0.33	MyList
KEGG Pathway	24	hsa04668	TNF signaling pathway		-2.1	7.4	4.1	28160	115	99	3	3	1.7	1437|6347|7124	CSF2|CCL2|TNF	-0.33	MyList
GO Biological Processes	19	GO:0015749	monosaccharide transmembrane transport	19_GO:0051179 localization	-2.1	7.4	4.1	28160	116	99	3	3	1.7	3099|6513|7124	HK2|SLC2A1|TNF	-0.32	MyList
GO Biological Processes	19	GO:0021782	glial cell development	19_GO:0032502 developmental process	-2.1	7.4	4.1	28160	116	99	3	3	1.7	7124|7431|10397	TNF|VIM|NDRG1	-0.32	MyList
GO Biological Processes	19	GO:0031346	positive regulation of cell projection organization	19_GO:0048518 positive regulation of biological process	-2.1	4	3.4	28160	353	99	5	5.1	2.2	2335|5365|5526|7422|7436	FN1|PLXNB3|PPP2R5B|VEGFA|VLDLR	-0.31	MyList
GO Biological Processes	19	GO:0050769	positive regulation of neurogenesis	19_GO:0048518 positive regulation of biological process	-2.1	5.1	3.6	28160	225	99	4	4	2	2335|5365|7124|7422	FN1|PLXNB3|TNF|VEGFA	-0.31	MyList
GO Biological Processes	19	GO:0034219	carbohydrate transmembrane transport	19_GO:0051179 localization	-2.1	7.2	4	28160	118	99	3	3	1.7	3099|6513|7124	HK2|SLC2A1|TNF	-0.31	MyList
GO Biological Processes	19	GO:0071346	cellular response to interferon-gamma	19_GO:0044419 biological process involved in interspecies interaction between organisms	-2.1	7.2	4	28160	118	99	3	3	1.7	6347|7431|9076	CCL2|VIM|CLDN1	-0.31	MyList
KEGG Pathway	24	ko04071	Sphingolipid signaling pathway		-2.1	7.2	4	28160	118	99	3	3	1.7	5526|7124|56624	PPP2R5B|TNF|ASAH2	-0.31	MyList
GO Biological Processes	19	GO:0007411	axon guidance	19_GO:0040011 locomotion	-2.1	5	3.6	28160	227	99	4	4	2	5365|7422|8577|9241	PLXNB3|VEGFA|TMEFF1|NOG	-0.3	MyList
GO Biological Processes	19	GO:0071774	response to fibroblast growth factor	19_GO:0050896 response to stimulus	-2.1	7.2	4	28160	119	99	3	3	1.7	6347|8862|9241	CCL2|APLN|NOG	-0.3	MyList
GO Biological Processes	19	GO:0010906	regulation of glucose metabolic process	19_GO:0050789 regulation of biological process	-2.1	7.2	4	28160	119	99	3	3	1.7	5163|5507|648791	PDK1|PPP1R3C|PPP1R3G	-0.3	MyList
GO Biological Processes	19	GO:0097485	neuron projection guidance	19_GO:0040011 locomotion	-2.1	5	3.6	28160	228	99	4	4	2	5365|7422|8577|9241	PLXNB3|VEGFA|TMEFF1|NOG	-0.3	MyList
GO Biological Processes	19	GO:0060284	regulation of cell development	19_GO:0032502 developmental process	-2.1	3.4	3.2	28160	502	99	6	6.1	2.4	2335|5365|7124|7422|9241|79365	FN1|PLXNB3|TNF|VEGFA|NOG|BHLHE41	-0.3	MyList
GO Biological Processes	19	GO:2000146	negative regulation of cell motility	19_GO:0040011 locomotion	-2.1	4	3.4	28160	358	99	5	5.1	2.2	5365|6347|6781|7124|9241	PLXNB3|CCL2|STC1|TNF|NOG	-0.3	MyList
WikiPathways	27	WP2431	Spinal cord injury		-2.1	7.1	4	28160	120	99	3	3	1.7	6347|7124|7431	CCL2|TNF|VIM	-0.3	MyList
GO Biological Processes	19	GO:0001649	osteoblast differentiation	19_GO:0032502 developmental process	-2	4.9	3.6	28160	230	99	4	4	2	6591|6615|7124|9241	SNAI2|SNAI1|TNF|NOG	-0.29	MyList
GO Biological Processes	19	GO:0048593	camera-type eye morphogenesis	19_GO:0032502 developmental process	-2	7.1	4	28160	121	99	3	3	1.7	7422|25987|91156	VEGFA|TSKU|IGFN1	-0.29	MyList
GO Biological Processes	19	GO:0051271	negative regulation of cellular component movement	19_GO:0048519 negative regulation of biological process	-2	3.9	3.3	28160	366	99	5	5.1	2.2	5365|6347|6781|7124|9241	PLXNB3|CCL2|STC1|TNF|NOG	-0.27	MyList
GO Biological Processes	19	GO:1904019	epithelial cell apoptotic process	19_GO:0009987 cellular process	-2	6.9	3.9	28160	124	99	3	3	1.7	6347|7124|51129	CCL2|TNF|ANGPTL4	-0.26	MyList
GO Biological Processes	19	GO:0001701	in utero embryonic development	19_GO:0032502 developmental process	-2	3.9	3.3	28160	369	99	5	5.1	2.2	133|1437|6615|7422|9241	ADM|CSF2|SNAI1|VEGFA|NOG	-0.25	MyList
GO Biological Processes	19	GO:0009150	purine ribonucleotide metabolic process	19_GO:0008152 metabolic process	-2	3.9	3.3	28160	369	99	5	5.1	2.2	205|3099|3939|5163|54541	AK4|HK2|LDHA|PDK1|DDIT4	-0.25	MyList
