# Supplementary figures and images for: Inflammatory Cytokine-Induced HIF-1 Activation Promotes Epithelial–Mesenchymal Transition in Endometrial Epithelial Cells
Source: MDPI journal article supplement (doi:10.3390/biomedicines11010210), 2023-01-14

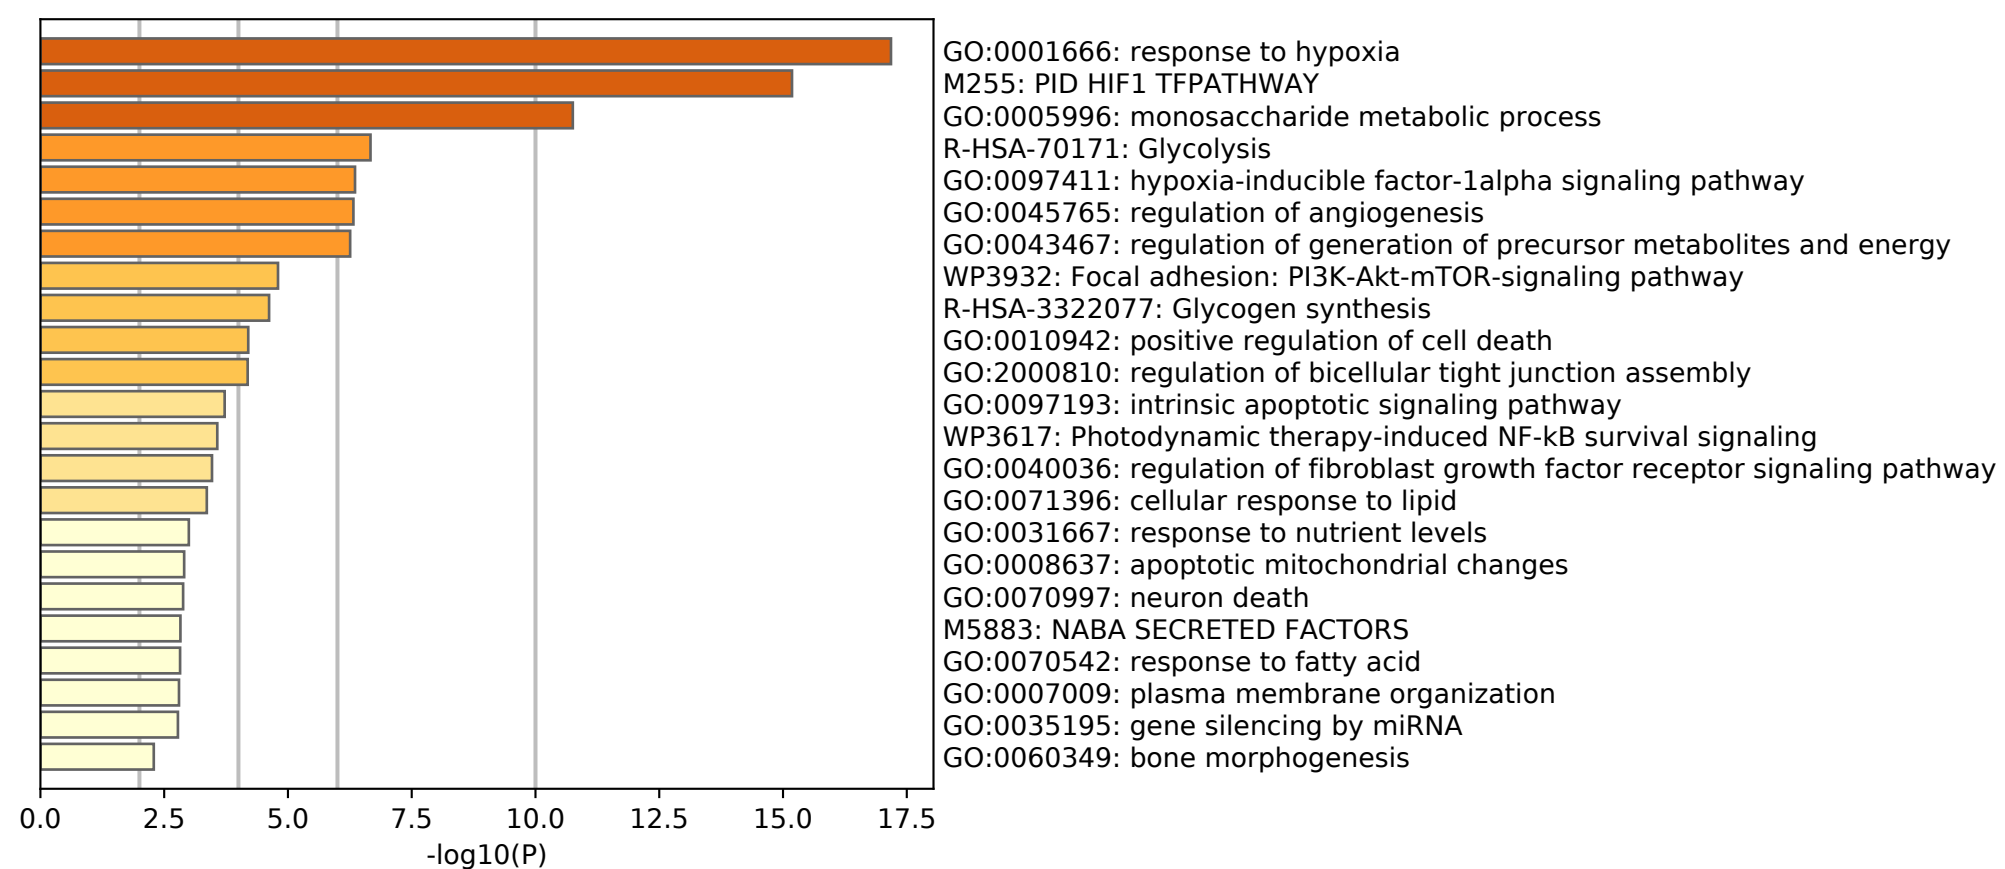

Supplement: s1 [file s1]

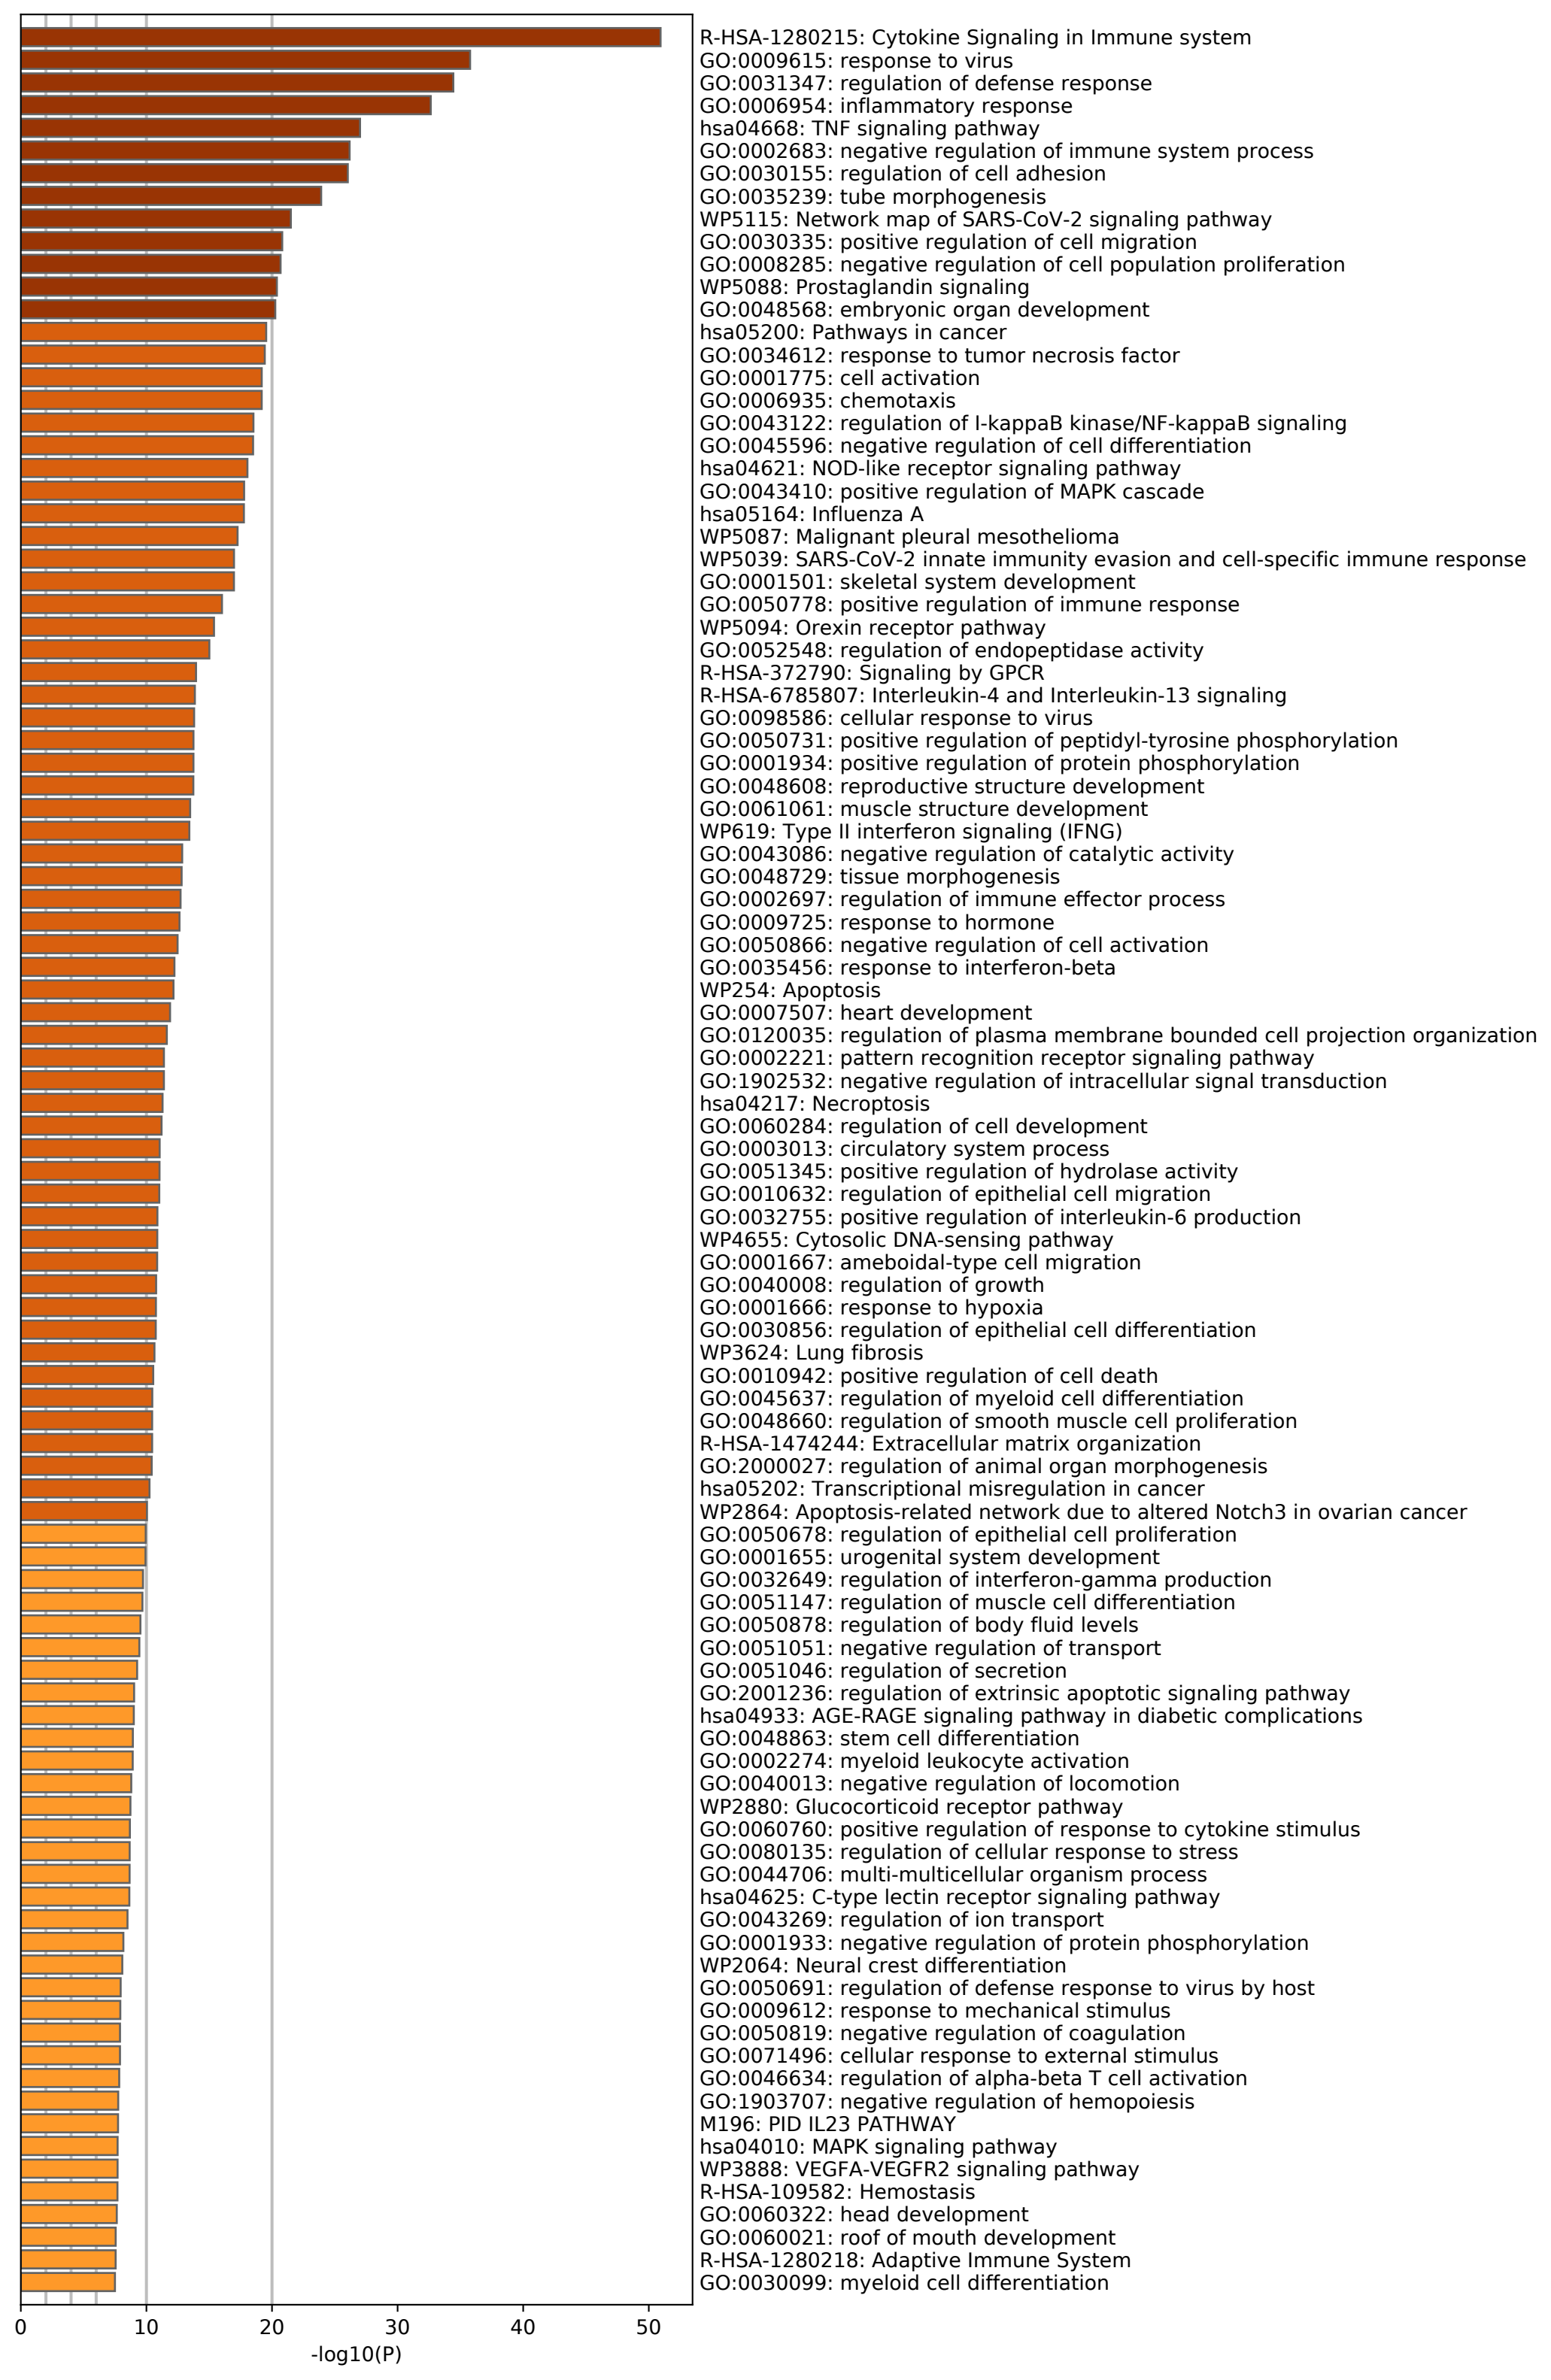

Supplement: s1 [file s1]

**A**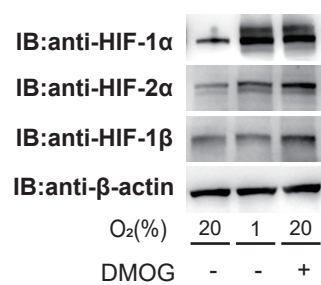**B**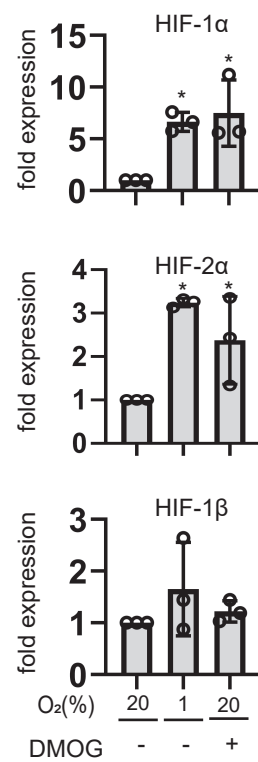

Supplement: s1 [file s1]

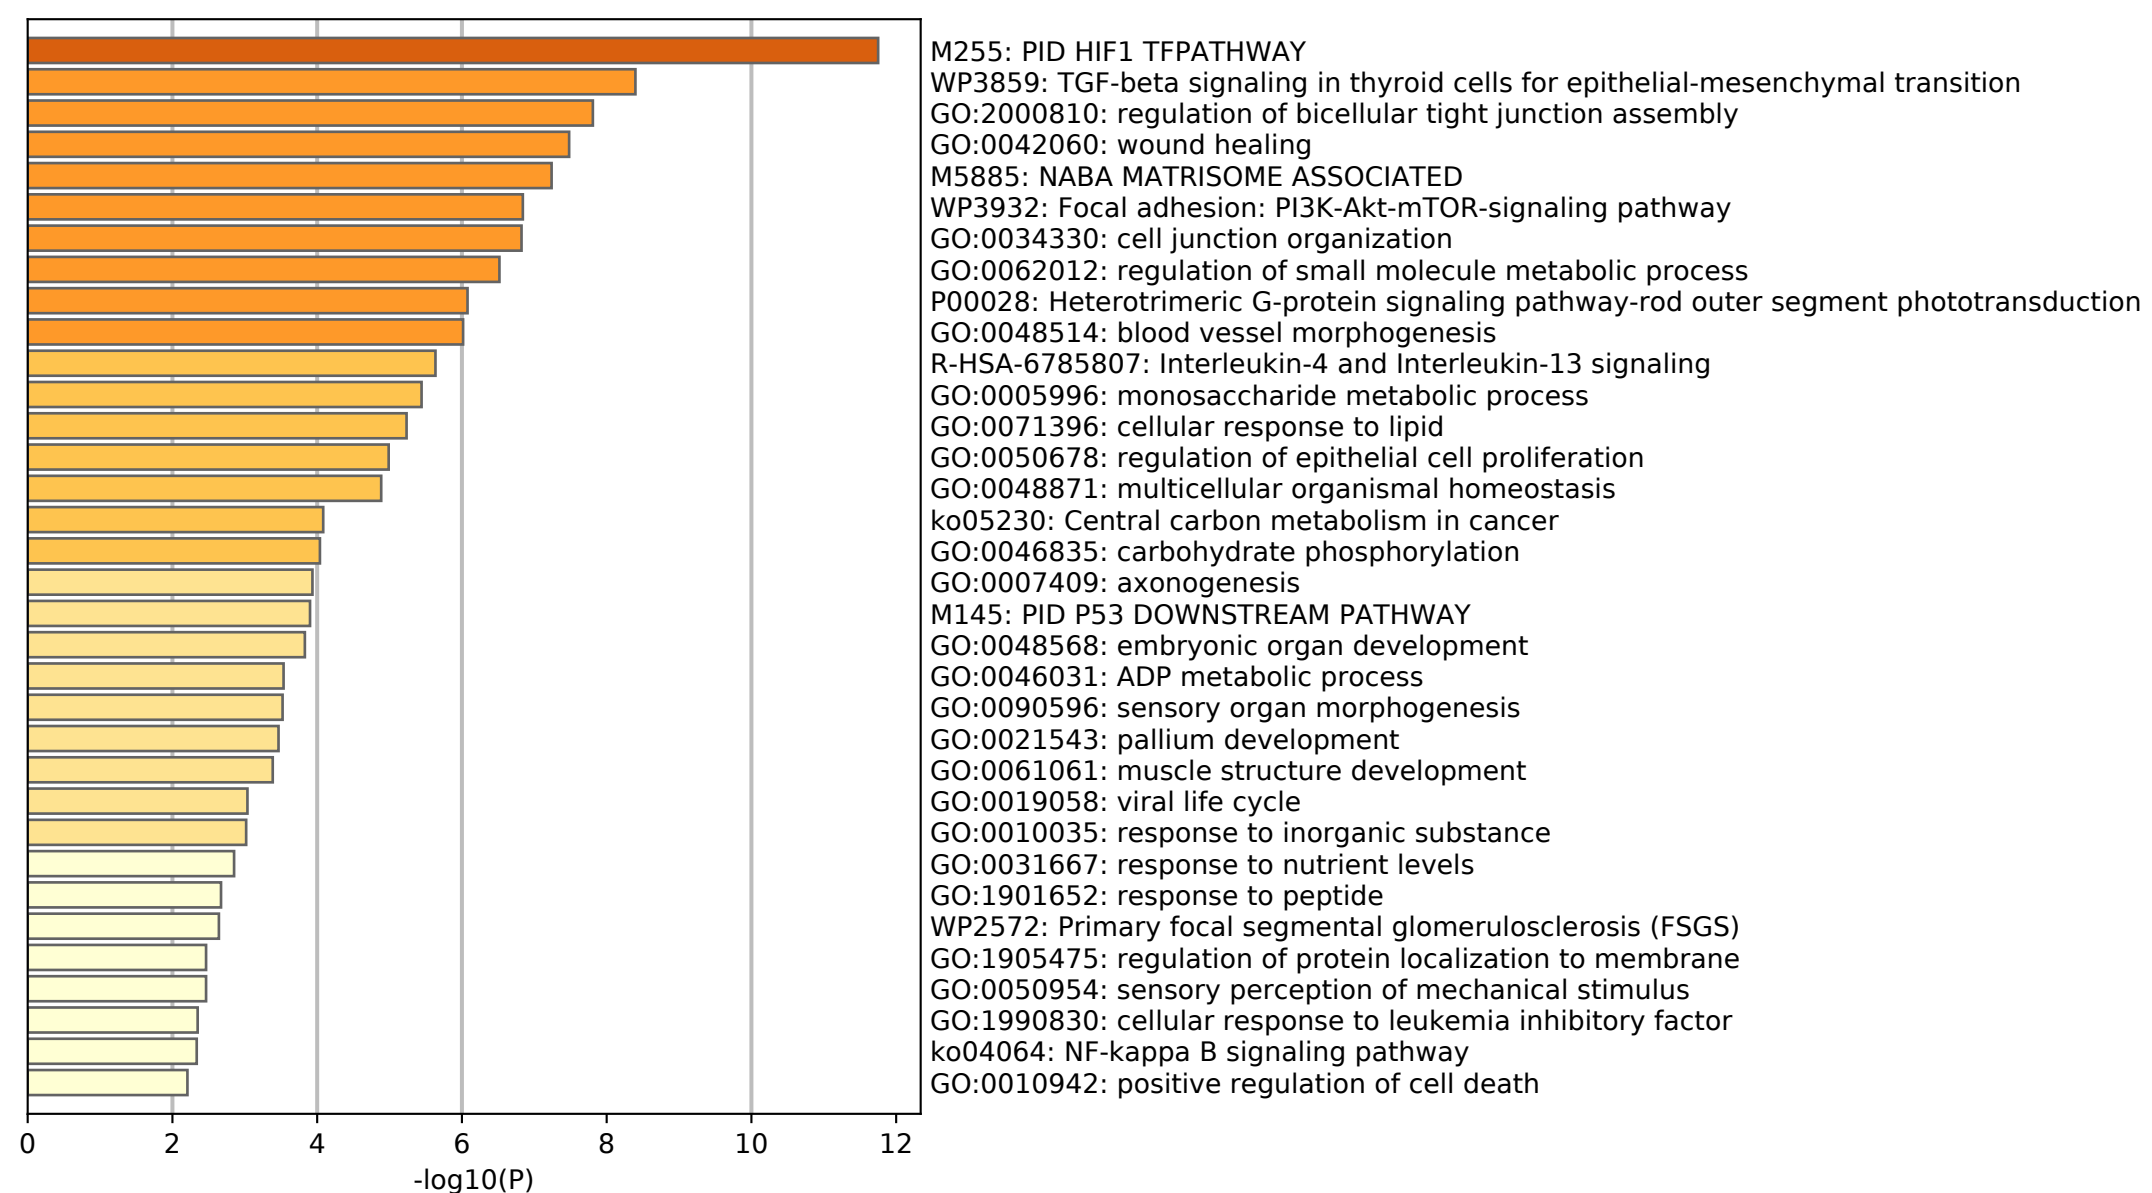

Supplement: s1 [file s1]
